# Supplementary material for: A New Face of the Old Gene: Deletion of the PssA, Encoding Monotopic Inner Membrane Phosphoglycosyl Transferase in Rhizobium leguminosarum, Leads to Diverse Phenotypes That Could Be Attributable to Downstream Effects of the Lack of Exopolysaccharide
Source: Int J Mol Sci. 2023 Jan 5;24(2):1035. doi: 10.3390/ijms24021035 (PMC9860679; doi:10.3390/ijms24021035)
Supplement: Supplementary file 1 [file ijms-24-01035-s001.zip]

Archive with 6 entries (6 files):
- Supplementary Data for PssA final.pdf
- Supplementary Table S3. RNAseq reads QC and filtering statistics.xlsx
- Supplementary Table S4. RNAseq WT vs. ΔpssA raw data set summary.xlsx
- Supplementary Table S5. All DEGs log2fold change values.xlsx
- Supplementary Table S6. DEGs rate on individual RtTA1 replicons.xlsx
- Supplementary Table S7. Comparison of set of data of proteomic and transcriptomic of delpssA.xlsx
