# Supplementary material for: A New Face of the Old Gene: Deletion of the PssA, Encoding Monotopic Inner Membrane Phosphoglycosyl Transferase in Rhizobium leguminosarum, Leads to Diverse Phenotypes That Could Be Attributable to Downstream Effects of the Lack of Exopolysaccharide
Source: Int J Mol Sci. 2023 Jan 5;24(2):1035. doi: 10.3390/ijms24021035 (PMC9860679; doi:10.3390/ijms24021035)
Supplement: Supplementary file 1 [file ijms-24-01035-s001.zip › Supplementary Table S3. RNAseq reads QC and filtering statistics.xlsx]

## Sheet: Arkusz1
	sample name	Sequenced bases	Number of reads	Number of PE reads	No/% of reads that passed filter	Low quality reads/%	Reads with too many N	Too short reads	% Adapter trimmed reads	Duplication rate in filtered reads
	WT_1	6114000000	40760000	20380000	40414220/99.2	332680/0.8	2754	10388	8.7%	14.1%
	WT_2	6725550000	44837000	22418500	44452290/99.1	370300/0.8	2994	11494	11.5%	14.4%
	WT_3	4805760000	32038400	16019200	31800882/99.3	228448/0.7	3046	6042	9.6%	15.4%
	delpssA_1	5291670000	35277800	17638900	34959816/99.1	307310/0.9	2418	8206	7.3%	15.1%
	delpssA_2	5111400000	34076000	17038000	33794412/99.2	269600/0.8	3294	8730	13.1%	21.9%
	delpssA_3	5559300000	37062000	18531000	36732574/99.1	319528/0.9	3462	6372	8.2%	16.5%
