# Supplementary material for: A New Face of the Old Gene: Deletion of the PssA, Encoding Monotopic Inner Membrane Phosphoglycosyl Transferase in Rhizobium leguminosarum, Leads to Diverse Phenotypes That Could Be Attributable to Downstream Effects of the Lack of Exopolysaccharide
Source: Int J Mol Sci. 2023 Jan 5;24(2):1035. doi: 10.3390/ijms24021035 (PMC9860679; doi:10.3390/ijms24021035)
Supplement: Supplementary file 1 [file ijms-24-01035-s001.zip › Supplementary Table S4. RNAseq WT vs. ΔpssA raw data set summary.xlsx]

## Sheet: WTvsDelpssA_deseq2
Geneid	baseMean	log2FoldChange	lfcSE	stat	pvalue	padj	DelpssA_1 raw counts	DelpssA_2 raw counts	DelpssA_3 raw counts	WT_1 raw counts	WT_2 raw counts	WT_3 raw counts	DelpssA_1.1 normalized counts	DelpssA_2.1 normalized counts	DelpssA_3.1 normalized counts	WT_1.1 normalized counts	WT_2.1 normalized counts	WT_3.1 normalized counts
RLTA1_RS27750	2043.66	-4.06466	0.125313	-32.436	8.5477e-231	5.5013e-227	221	225	206	3845	4699	3747	243.535	234.516	213.679	3805.04	3900.8	3864.38
RLTA1_RS27755	2125.95	-4.31993	0.146808	-29.4257	2.57338e-190	8.28114e-187	182	198	194	3661	4851	4361	200.558	206.374	201.231	3622.95	4026.98	4497.61
RLTA1_RS27770	1852.49	-3.32664	0.127291	-26.1341	1.49576e-150	3.20891e-147	276	332	344	3338	3978	3396	304.143	346.041	356.823	3303.31	3302.27	3502.38
RLTA1_RS27765	1104.43	-4.01379	0.153926	-26.0762	6.78886e-150	1.09233e-146	131	108	125	2032	2411	2160	144.358	112.568	129.659	2010.88	2001.45	2227.66
RLTA1_RS27745	2859.13	-4.19206	0.162738	-25.7595	2.52232e-146	3.24673e-143	221	328	293	5179	6280	5747	243.535	341.872	303.922	5125.18	5213.24	5927.03
RLTA1_RS27740	3882.46	-3.43957	0.134366	-25.5986	1.5815e-144	1.69643e-141	573	698	585	7728	8485	6436	631.428	727.52	606.806	7647.69	7043.68	6637.61
RLTA1_RS17400	10119.8	-4.40067	0.187579	-23.4604	1.03623e-121	9.52737e-119	696	888	1014	23777	20621	16800	766.97	925.555	1051.8	23529.9	17118.2	17326.3
RLTA1_RS27760	1455.68	-3.35903	0.155083	-21.6596	4.93918e-104	3.97357e-101	192	267	275	2535	3282	2643	211.578	278.292	285.251	2508.65	2724.5	2725.79
RLTA1_RS34375	14793.5	2.27022	0.163245	13.9069	5.75476e-44	4.11529e-41	21194	22426	25829	5599	6745	3975	23355.1	23374.4	26791.8	5540.81	5599.25	4099.52
RLTA1_RS34380	942.253	1.7315	0.126288	13.7107	8.75779e-43	5.63651e-40	1355	1456	1286	450	506	430	1493.17	1517.58	1333.94	445.323	420.047	443.47
RLTA1_RS09750	913.465	1.17002	0.113836	10.2782	8.84035e-25	5.17241e-22	1149	1220	1212	549	703	542	1266.16	1271.6	1257.18	543.295	583.584	558.979
RLTA1_RS23195	1680.26	1.32747	0.137309	9.66773	4.13446e-22	2.21745e-19	2398	2213	2179	868	1199	987	2642.52	2306.59	2260.22	858.979	995.33	1017.92
RLTA1_RS34350	6591.52	1.89353	0.214976	8.80807	1.27322e-18	6.30341e-16	10143	8970	10254	3298	3860	1860	11177.3	9349.36	10636.2	3263.73	3204.31	1918.27
RLTA1_RS23165	3483.29	1.18507	0.136004	8.71349	2.9467e-18	1.35464e-15	4844	4197	4631	2312	2582	1893	5337.93	4374.5	4803.62	2287.97	2143.4	1952.3
RLTA1_RS26875	3109.31	1.19294	0.140825	8.4711	2.43095e-17	1.04304e-14	3960	4104	4182	2156	2320	1568	4363.79	4277.57	4337.88	2133.59	1925.91	1617.12
RLTA1_RS10060	1926.07	2.03895	0.245874	8.29267	1.10736e-16	4.45434e-14	2640	2913	3230	830	1171	453	2909.2	3036.2	3350.4	821.374	972.086	467.191
RLTA1_RS14840	1266.01	1.31239	0.158961	8.25605	1.50578e-16	5.384e-14	1505	2048	1564	794	853	666	1658.46	2134.61	1622.3	785.748	708.103	686.863
RLTA1_RS23265	1628.87	1.27621	0.154541	8.25806	1.48065e-16	5.384e-14	1873	2368	2300	822	1282	948	2063.99	2468.15	2385.73	813.457	1064.23	977.697
RLTA1_RS14845	18775.3	1.60184	0.195874	8.1779	2.88832e-16	9.78381e-14	26484	25145	28287	12225	9059	8047	29184.5	26208.4	29341.4	12098	7520.18	8299.08
RLTA1_RS07400	300.806	1.56062	0.192416	8.11067	5.03418e-16	1.62e-13	386	479	407	153	147	179	425.36	499.258	422.171	151.41	122.03	184.607
RLTA1_RS07395	289.932	1.69364	0.215197	7.87021	3.54043e-15	1.08506e-12	400	478	375	118	139	174	440.787	498.216	388.978	116.774	115.388	179.451
RLTA1_RS23585	627.72	1.27098	0.161847	7.85299	4.06228e-15	1.1884e-12	869	768	872	435	406	326	957.61	800.48	904.504	430.479	337.034	336.212
RLTA1_RS34280	953.251	1.13627	0.147132	7.72281	1.13797e-14	3.18434e-12	1262	1275	1167	609	627	646	1390.68	1328.92	1210.5	602.671	520.493	666.236
RLTA1_RS07405	339.397	1.35802	0.176921	7.67586	1.64306e-14	4.40614e-12	485	493	401	189	203	210	534.454	513.85	415.947	187.036	168.517	216.578
RLTA1_RS34450	925.967	1.24196	0.164123	7.56724	3.81227e-14	9.81431e-12	1143	1269	1276	453	778	539	1259.55	1322.67	1323.56	448.292	645.844	555.885
RLTA1_RS34385	1919.26	0.789667	0.105124	7.51174	5.83486e-14	1.44435e-11	2217	2350	2316	1439	1626	1403	2443.06	2449.39	2402.33	1424.05	1349.8	1446.95
RLTA1_RS20865	15077.7	-0.845256	0.112682	-7.50126	6.32052e-14	1.50662e-11	10178	9871	10455	18151	23872	19720	11215.8	10288.5	10844.7	17962.4	19816.9	20337.7
RLTA1_RS29630	10937.9	1.15772	0.155901	7.42595	1.11975e-13	2.57381e-11	14236	13601	14896	8081	6939	6356	15687.6	14176.2	15451.2	7997.02	5760.29	6555.11
RLTA1_RS07700	2865.94	-1.02895	0.13899	-7.40303	1.33115e-13	2.95423e-11	1726	1683	1928	3589	5258	3513	1902	1754.18	1999.87	3551.7	4364.84	3623.05
RLTA1_RS20855	1603.12	-1.20452	0.163571	-7.36391	1.78604e-13	3.83164e-11	937	843	964	1861	3039	2272	1032.54	878.652	999.933	1841.66	2522.77	2343.17
RLTA1_RS20760	1299.02	0.89539	0.121838	7.34904	1.99642e-13	4.14483e-11	1444	1642	1702	954	1016	910	1591.24	1711.44	1765.44	944.086	843.415	938.506
RLTA1_RS10065	879.104	1.3101	0.178644	7.33362	2.24023e-13	4.50566e-11	1013	1351	1191	451	738	442	1116.29	1408.14	1235.39	446.313	612.638	455.846
RLTA1_RS23580	516.58	1.26439	0.173001	7.30856	2.70016e-13	5.26613e-11	690	702	671	377	323	262	760.358	731.689	696.012	373.082	268.133	270.207
RLTA1_RS26880	3356.32	1.20934	0.169561	7.13221	9.87673e-13	1.86961e-10	4323	4295	4645	2435	2475	1566	4763.81	4476.64	4818.14	2409.69	2054.58	1615.06
RLTA1_RS19735	3210.11	1.22089	0.17141	7.12262	1.05895e-12	1.94725e-10	4714	3845	4122	2304	2085	1718	5194.68	4007.61	4275.65	2280.06	1730.83	1771.82
RLTA1_RS23015	2176.18	1.15882	0.16333	7.095	1.29353e-12	2.31254e-10	2267	3412	2857	1441	1611	1237	2498.16	3556.3	2963.49	1426.02	1337.34	1275.75
RLTA1_RS19740	614.978	1.23677	0.175074	7.06429	1.61439e-12	2.80817e-10	883	858	697	425	398	338	973.038	894.286	722.981	420.583	330.393	348.588
RLTA1_RS34895	673.074	0.884086	0.125411	7.04949	1.79572e-12	3.04138e-10	744	869	861	472	550	481	819.864	905.752	893.094	467.095	456.573	496.068
RLTA1_RS14995	1790.71	0.881785	0.126856	6.95109	3.62462e-12	5.98155e-10	1955	2407	2219	1336	1555	1131	2154.35	2508.8	2301.71	1322.12	1290.86	1166.43
RLTA1_RS32075	1152.57	1.01838	0.146811	6.9367	4.01378e-12	6.45817e-10	1537	1502	1322	812	967	658	1693.72	1565.52	1371.28	803.561	802.739	678.612
RLTA1_RS14850	38751.1	1.27405	0.18482	6.89346	5.44512e-12	8.54751e-10	51417	46955	56773	28862	24101	18857	56659.9	48940.8	58889.2	28562.1	20007	19447.7
RLTA1_RS19670	3991.5	-1.0949	0.158991	-6.88652	5.71755e-12	8.76147e-10	2256	2313	2641	5100	5754	6292	2486.04	2410.82	2739.44	5047	4776.59	6489.1
RLTA1_RS23180	2481.62	1.03541	0.150534	6.87824	6.0597e-12	9.06983e-10	3032	3402	3007	1771	1641	1715	3341.17	3545.88	3119.09	1752.59	1362.25	1768.72
RLTA1_RS07705	7416.31	-1.00241	0.146886	-6.82437	8.83144e-12	1.2918e-09	5104	4120	4722	9181	12687	9758	5624.44	4294.24	4898.01	9085.59	10531.9	10063.7
RLTA1_RS09995	313.855	-1.03659	0.153719	-6.74336	1.54761e-11	2.21343e-09	199	199	184	390	549	411	219.292	207.416	190.859	385.947	455.743	423.875
RLTA1_RS29620	5807.83	1.25299	0.187228	6.69235	2.19619e-11	3.07276e-09	8912	7545	6616	4116	3864	2927	9820.74	7864.09	6862.61	4073.22	3207.63	3018.69
RLTA1_RS23160	14948.8	0.918113	0.137956	6.65513	2.83042e-11	3.87587e-09	18167	18121	19036	11442	10633	10560	20019.4	18887.4	19745.6	11323.1	8826.8	10890.8
RLTA1_RS34270	7850.3	1.00993	0.152352	6.62893	3.3814e-11	4.53389e-09	11016	9032	9564	5662	6467	4515	12139.3	9413.98	9920.5	5603.16	5368.47	4656.44
RLTA1_RS28380	4424.74	0.829975	0.125814	6.59683	4.20054e-11	5.51728e-09	4666	5877	5518	3256	4035	2895	5141.78	6125.55	5723.68	3222.16	3349.59	2985.69
RLTA1_RS06710	3400.87	-1.04105	0.158162	-6.5822	4.6354e-11	5.96669e-09	2192	1875	2221	5280	5474	3842	2415.51	1954.3	2303.79	5225.13	4544.15	3962.35
RLTA1_RS32080	6334.23	1.16431	0.177288	6.56733	5.12243e-11	6.4643e-09	8988	7961	7788	4574	4922	3018	9904.49	8297.69	8078.3	4526.46	4085.91	3112.54
RLTA1_RS29625	7559.49	1.12033	0.171137	6.54637	5.89507e-11	7.29628e-09	10629	9373	9240	5784	5376	3979	11712.8	9769.4	9584.42	5723.89	4462.8	4103.65
RLTA1_RS24030	1226.73	-0.886286	0.135759	-6.52838	6.64858e-11	8.07363e-09	847	720	868	1668	1873	1523	933.367	750.45	900.355	1650.67	1554.84	1570.71
RLTA1_RS17025	1323.01	-1.22406	0.187682	-6.522	6.93745e-11	8.26841e-09	797	671	773	2332	1932	1597	878.268	699.378	801.814	2307.76	1603.82	1647.03
RLTA1_RS28065	889.437	0.737459	0.113463	6.49957	8.05511e-11	9.42595e-09	1026	1067	1054	648	820	658	1130.62	1112.13	1093.29	641.266	680.709	678.612
RLTA1_RS05790	14098.4	1.02014	0.158954	6.41788	1.38186e-10	1.58816e-08	14990	19854	18745	10105	12146	7613	16518.5	20693.7	19443.7	9999.98	10082.8	7851.48
RLTA1_RS34310	283.288	0.976954	0.153202	6.37691	1.80693e-10	2.04025e-08	363	354	345	212	215	179	400.014	368.971	357.86	209.797	178.479	184.607
RLTA1_RS10055	1436.25	1.80967	0.28448	6.36132	2.00021e-10	2.21954e-08	1919	1873	2544	746	990	341	2114.68	1952.21	2638.83	738.247	821.832	351.682
RLTA1_RS20755	19910.2	1.31204	0.207811	6.31362	2.72579e-10	2.97343e-08	25840	25976	28548	15518	11177	9371	28474.8	27074.6	29612.1	15356.7	9278.4	9664.55
RLTA1_RS13985	1652.91	0.883333	0.140506	6.28682	3.24039e-10	3.41888e-08	1836	2261	1977	1313	1291	1082	2023.21	2356.62	2050.69	1299.35	1071.7	1115.89
RLTA1_RS16800	1397.67	0.790866	0.125761	6.28864	3.20269e-10	3.41888e-08	1554	1843	1621	1059	1288	925	1712.46	1920.94	1681.42	1047.99	1069.21	953.976
RLTA1_RS24115	5408.59	-0.733013	0.11687	-6.27206	3.56304e-10	3.66667e-08	3847	3635	4013	6364	8530	6673	4239.27	3788.73	4162.58	6297.86	7081.03	6882.04
RLTA1_RS34355	30097.2	1.15774	0.184621	6.27092	3.58919e-10	3.66667e-08	39284	40666	37615	23212	17374	17935	43289.7	42385.8	39017.1	22970.8	14422.7	18496.8
RLTA1_RS13105	1005.05	1.01255	0.162053	6.24827	4.15037e-10	4.1095e-08	998	1426	1394	633	855	642	1099.76	1486.31	1445.96	626.422	709.764	662.111
RLTA1_RS34285	2166.11	0.821569	0.131441	6.25046	4.09251e-10	4.1095e-08	2681	2765	2375	1541	1807	1621	2954.38	2881.94	2463.53	1524.99	1500.05	1671.78
RLTA1_RS06355	3225.31	-0.987571	0.158645	-6.22504	4.81418e-10	4.69456e-08	2226	1714	2168	4062	5607	4062	2452.98	1786.49	2248.81	4019.79	4654.56	4189.25
RLTA1_RS06905	1082.48	0.925914	0.149817	6.18029	6.39837e-10	6.14625e-08	1153	1579	1291	730	954	703	1270.57	1645.78	1339.12	722.413	791.947	725.022
RLTA1_RS13980	3620.06	1.86034	0.301707	6.16604	7.00194e-10	6.62713e-08	4805	6040	5244	2509	1489	942	5294.96	6295.44	5439.47	2482.93	1236.07	971.509
RLTA1_RS29615	227.509	1.06085	0.172272	6.15799	7.36735e-10	6.87192e-08	308	291	270	168	171	130	339.406	303.307	280.064	166.254	141.953	134.072
RLTA1_RS35780	16302.6	-0.997978	0.162336	-6.14762	7.86522e-10	7.23151e-08	10219	9113	11449	21640	22463	24355	11261	9498.41	11875.8	21415.1	18647.3	25117.9
RLTA1_RS29850	766.508	1.71618	0.279745	6.13479	8.52695e-10	7.7295e-08	1388	991	928	365	276	469	1529.53	1032.91	962.591	361.207	229.117	483.692
RLTA1_RS34410	1378.8	0.865564	0.141696	6.10858	1.0052e-09	8.98541e-08	1853	1642	1531	966	1172	972	2041.95	1711.44	1588.07	955.961	972.916	1002.45
RLTA1_RS34900	1555.89	0.734931	0.120444	6.10186	1.04844e-09	9.24346e-08	1853	1927	1717	1228	1373	1114	2041.95	2008.5	1781	1215.24	1139.77	1148.9
RLTA1_RS07710	6713.94	-0.92655	0.152427	-6.07863	1.21214e-09	1.04018e-07	4842	3697	4530	8793	11023	8284	5335.73	3853.35	4698.86	8701.62	9150.56	8543.5
RLTA1_RS32895	759.848	0.76433	0.12572	6.07963	1.20456e-09	1.04018e-07	867	858	983	593	654	543	955.406	894.286	1019.64	586.837	542.907	560.01
RLTA1_RS00820	20528.5	0.8034	0.132736	6.05261	1.42514e-09	1.20687e-07	23217	24221	26487	16111	19178	12608	25584.4	25245.4	27474.3	15943.6	15920.3	13003
RLTA1_RS16725	1083.68	0.782356	0.129825	6.02625	1.67803e-09	1.40257e-07	1108	1367	1413	815	969	756	1220.98	1424.81	1465.67	806.53	804.399	779.682
RLTA1_RS09635	4358.27	0.768	0.128242	5.98867	2.11569e-09	1.70208e-07	4657	5812	5096	3165	4182	2977	5131.86	6057.8	5285.95	3132.11	3471.62	3070.26
RLTA1_RS27345	2185.18	0.796656	0.133012	5.98933	2.10701e-09	1.70208e-07	2635	2515	2696	1740	2002	1363	2903.69	2621.36	2796.49	1721.92	1661.93	1405.7
RLTA1_RS33005	6308.41	1.14704	0.191529	5.98886	2.11312e-09	1.70208e-07	5885	9745	9095	3765	5229	3595	6485.08	10157.1	9434.02	3725.87	4340.77	3707.62
RLTA1_RS07715	1292.65	-0.947877	0.158414	-5.98353	2.1835e-09	1.73494e-07	847	738	912	1602	2358	1517	933.367	769.211	945.995	1585.35	1957.45	1564.52
RLTA1_RS34705	1246.2	0.649692	0.108879	5.96708	2.41538e-09	1.89578e-07	1388	1411	1510	999	1165	926	1529.53	1470.67	1566.29	988.618	967.105	955.008
RLTA1_RS34290	1501.62	0.989159	0.165876	5.96324	2.47286e-09	1.91751e-07	2140	1679	1815	1076	1068	1035	2358.21	1750.01	1882.65	1064.82	886.582	1067.42
RLTA1_RS17135	928.522	0.715808	0.120341	5.94816	2.7118e-09	2.07776e-07	1083	1036	1147	734	852	654	1193.43	1079.81	1189.75	726.372	707.273	674.487
RLTA1_RS24660	1940.9	-0.865663	0.148137	-5.84364	5.10712e-09	3.86699e-07	1324	1116	1450	2480	2860	2609	1459.01	1163.2	1504.05	2454.23	2374.18	2690.73
RLTA1_RS23255	3385.57	0.896635	0.154295	5.81116	6.20425e-09	4.64309e-07	4573	3793	4071	2656	2851	2039	5039.3	3953.41	4222.75	2628.4	2366.71	2102.87
RLTA1_RS27300	1189.99	0.921972	0.159071	5.796	6.79167e-09	5.02427e-07	1297	1569	1552	813	1156	680	1429.25	1635.36	1609.85	804.551	959.634	701.301
RLTA1_RS23965	868.753	-0.741152	0.129079	-5.74187	9.36355e-09	6.84816e-07	562	611	670	1012	1357	1099	619.306	636.84	694.974	1001.48	1126.49	1133.43
RLTA1_RS17375	4347.96	-0.661547	0.11529	-5.73813	9.57286e-09	6.92258e-07	3205	3104	3218	4980	6732	5300	3531.81	3235.27	3337.95	4928.25	5588.46	5466.03
RLTA1_RS00415	8441.67	-1.14588	0.200707	-5.7092	1.13509e-08	7.85533e-07	4805	4890	5180	8816	13460	14532	5294.96	5096.81	5373.08	8724.38	11173.6	14987.2
RLTA1_RS01875	930.631	-0.800037	0.140077	-5.71139	1.12057e-08	7.85533e-07	631	607	684	1067	1570	1151	695.342	632.671	709.496	1055.91	1303.31	1187.06
RLTA1_RS09745	1633.8	0.84984	0.148851	5.70934	1.13417e-08	7.85533e-07	2115	1935	1888	1116	1600	1032	2330.66	2016.83	1958.38	1104.4	1328.21	1064.33
RLTA1_RS17160	930.578	-0.899477	0.157514	-5.71047	1.12667e-08	7.85533e-07	542	616	684	1050	1652	1187	597.267	642.052	709.496	1039.09	1371.38	1224.18
RLTA1_RS04210	719.165	-0.839781	0.14737	-5.69844	1.20911e-08	8.27854e-07	464	500	496	795	1204	952	511.313	521.146	514.488	786.738	999.48	981.822
RLTA1_RS12540	480.861	0.822945	0.1449	5.67939	1.35174e-08	9.15771e-07	576	587	576	311	466	336	634.733	611.825	597.47	307.768	386.842	346.525
RLTA1_RS20550	1197.47	-0.840395	0.148294	-5.66709	1.4524e-08	9.73713e-07	812	698	918	1547	1754	1574	894.798	727.52	952.218	1530.92	1456.05	1623.31
RLTA1_RS25710	2747.49	-0.757476	0.133896	-5.65721	1.53855e-08	1.02084e-06	2107	1802	1858	3394	4094	3491	2321.85	1878.21	1927.26	3358.73	3398.56	3600.36
RLTA1_RS12310	1045.57	0.636832	0.112704	5.65047	1.60006e-08	1.05081e-06	1156	1231	1216	858	998	754	1273.87	1283.06	1261.33	849.083	828.473	777.62
RLTA1_RS34045	8862.59	-1.17593	0.208182	-5.64856	1.61798e-08	1.05185e-06	6068	3933	5330	14690	13095	11105	6686.74	4099.33	5528.68	14537.3	10870.6	11452.9
RLTA1_RS12985	1177.58	1.16494	0.206468	5.64225	1.67845e-08	1.08025e-06	1182	1855	1590	757	694	829	1302.53	1933.45	1649.27	749.133	576.112	854.969
RLTA1_RS32810	773.564	-0.779303	0.138855	-5.61233	1.99617e-08	1.27202e-06	525	518	569	884	1182	1044	578.533	539.907	590.209	874.813	981.217	1076.7
RLTA1_RS18200	4807.31	0.796732	0.142221	5.60209	2.11785e-08	1.33632e-06	5853	5441	5964	3473	4813	3010	6449.82	5671.11	6186.31	3436.91	3995.43	3104.29
RLTA1_RS28385	2408.04	0.629855	0.113368	5.55585	2.76263e-08	1.70965e-06	2537	3009	2742	1866	2249	1899	2795.69	3136.26	2844.21	1846.61	1866.97	1958.49
RLTA1_RS34710	1800.18	0.658219	0.118441	5.55738	2.73862e-08	1.70965e-06	1884	2177	2185	1496	1688	1268	2076.11	2269.07	2266.45	1480.45	1401.26	1307.72
RLTA1_RS17245	3621	0.555815	0.10028	5.54262	2.97978e-08	1.82646e-06	3991	4045	4161	3046	3517	2775	4397.95	4216.07	4316.1	3014.34	2919.58	2861.93
RLTA1_RS33555	629.016	-1.28905	0.233162	-5.52856	3.2287e-08	1.96037e-06	459	285	283	781	1128	939	505.803	297.053	293.549	772.883	936.39	968.415
RLTA1_RS07730	7069.64	-0.668361	0.121221	-5.51357	3.51619e-08	2.11497e-06	5301	4732	5407	8553	10207	8822	5841.53	4932.12	5608.55	8464.11	8473.17	9098.36
RLTA1_RS21930	700.974	-0.993555	0.180286	-5.51099	3.56821e-08	2.12639e-06	380	501	448	819	1034	1097	418.748	522.188	464.699	810.489	858.358	1131.36
RLTA1_RS27350	1084.46	0.772573	0.140233	5.5092	3.60471e-08	2.12843e-06	1228	1271	1376	823	1072	676	1353.22	1324.75	1427.29	814.447	889.903	697.176
RLTA1_RS12160	6279.22	0.835369	0.152099	5.49228	3.96778e-08	2.32151e-06	7705	6352	8708	4699	5262	4376	8490.66	6620.64	9032.59	4650.17	4368.16	4513.08
RLTA1_RS04700	4744.47	0.785305	0.143108	5.48749	4.0769e-08	2.36387e-06	5090	6590	5337	3749	3843	3445	5609.02	6868.7	5535.94	3710.04	3190.2	3552.92
RLTA1_RS06920	487.91	-1.21555	0.222193	-5.47072	4.48211e-08	2.54641e-06	267	240	325	510	1028	667	294.225	250.15	337.114	504.7	853.377	687.894
RLTA1_RS15450	339.752	-0.834806	0.15255	-5.47235	4.44096e-08	2.54641e-06	243	228	219	477	520	390	267.778	237.643	227.163	472.043	431.669	402.217
RLTA1_RS23070	241.811	0.964589	0.176354	5.4696	4.51042e-08	2.54641e-06	324	294	285	146	191	183	357.038	306.434	295.623	144.483	158.555	188.733
RLTA1_RS11795	1631.59	0.699661	0.128227	5.45641	4.85846e-08	2.71905e-06	1834	2068	1815	1356	1497	1111	2021.01	2155.46	1882.65	1341.91	1242.71	1145.8
RLTA1_RS12190	2149.79	1.42051	0.260718	5.44844	5.08122e-08	2.8192e-06	2714	3743	2409	1552	1445	749	2990.74	3901.3	2498.8	1535.87	1199.54	772.463
RLTA1_RS17240	978.829	0.68974	0.126708	5.44355	5.22284e-08	2.87301e-06	1069	1140	1214	686	933	770	1178	1188.21	1259.25	678.871	774.514	794.121
RLTA1_RS22530	1431.95	-0.58828	0.108101	-5.44194	5.27026e-08	2.87452e-06	1068	1058	1111	1780	2061	1636	1176.9	1102.74	1152.41	1761.5	1710.9	1687.25
RLTA1_RS15390	1974.69	-0.834884	0.153758	-5.42986	5.63992e-08	3.0503e-06	1445	1233	1330	2485	3460	2191	1592.34	1285.15	1379.58	2459.17	2872.26	2259.63
RLTA1_RS19195	2094.03	-1.34347	0.247948	-5.41837	6.01459e-08	3.22582e-06	1287	1241	810	3750	3741	2129	1418.23	1293.48	840.193	3711.03	3105.53	2195.69
RLTA1_RS28060	672.188	0.751348	0.138924	5.40832	6.36169e-08	3.38379e-06	723	805	863	483	671	453	796.723	839.045	895.168	477.98	557.019	467.191
RLTA1_RS20860	1990.05	-0.927069	0.171704	-5.39921	6.69347e-08	3.53108e-06	1475	1178	1217	2293	3128	2869	1625.4	1227.82	1262.36	2269.17	2596.66	2958.87
RLTA1_RS23810	710.912	0.72125	0.13373	5.39332	6.91669e-08	3.61917e-06	742	875	892	586	639	485	817.66	912.005	925.249	579.91	530.455	500.193
RLTA1_RS25910	868.344	-1.16532	0.217253	-5.36389	8.14499e-08	4.22751e-06	646	407	454	1388	1375	1055	711.871	424.213	470.923	1373.58	1141.43	1088.05
RLTA1_RS12640	2448.88	0.682771	0.127648	5.34884	8.85197e-08	4.5577e-06	2586	3076	2890	2057	2288	1653	2849.69	3206.09	2997.72	2035.62	1899.34	1704.78
RLTA1_RS11620	3705.31	0.707992	0.132894	5.32748	9.95851e-08	5.08675e-06	4159	4354	4501	3223	3297	2439	4583.08	4538.14	4668.77	3189.5	2736.95	2515.4
RLTA1_RS02295	2290.75	-0.815649	0.153178	-5.32485	1.01038e-07	5.12031e-06	1770	1366	1548	3064	3351	2861	1950.48	1423.77	1605.7	3032.16	2781.78	2950.62
RLTA1_RS34275	2173.38	0.794319	0.149367	5.3179	1.04974e-07	5.27821e-06	2787	2586	2414	1505	1775	1752	3071.18	2695.37	2503.98	1489.36	1473.49	1806.88
RLTA1_RS17700	831.429	-1.01162	0.190486	-5.3107	1.09204e-07	5.44834e-06	596	452	507	1155	1101	1239	656.773	471.116	525.898	1143	913.976	1277.81
RLTA1_RS17370	1778.66	-0.729286	0.137494	-5.30414	1.13208e-07	5.60466e-06	1359	1165	1257	2068	2749	2257	1497.57	1214.27	1303.85	2046.51	2282.04	2327.7
RLTA1_RS00420	2572.5	0.766519	0.145161	5.28046	1.28861e-07	6.33091e-06	2730	3031	3426	2079	2418	1599	3008.37	3159.19	3553.7	2057.39	2007.26	1649.09
RLTA1_RS26910	617.763	0.725797	0.137513	5.27803	1.30578e-07	6.36666e-06	633	757	794	443	595	450	697.546	789.015	823.596	438.396	493.929	464.097
RLTA1_RS33015	449.93	0.728261	0.138486	5.25872	1.45059e-07	7.01952e-06	468	562	561	320	419	341	515.721	585.768	581.911	316.674	347.826	351.682
RLTA1_RS02835	1915.34	-0.994292	0.189497	-5.24702	1.54581e-07	7.36949e-06	1252	1082	1286	2779	3559	1887	1379.66	1127.76	1333.94	2750.12	2954.44	1946.11
RLTA1_RS17020	2065.46	-1.85985	0.354408	-5.24777	1.53953e-07	7.36949e-06	985	714	817	4136	5137	1317	1085.44	744.196	847.454	4093.02	4264.39	1358.26
RLTA1_RS07660	9470.09	-0.64939	0.123878	-5.24217	1.58697e-07	7.51009e-06	6761	6951	7160	10338	14663	11922	7450.4	7244.97	7426.89	10230.6	12172.2	12295.5
RLTA1_RS22160	1711.43	-0.583595	0.111365	-5.24039	1.60241e-07	7.52782e-06	1301	1298	1276	2147	2495	1903	1433.66	1352.89	1323.56	2124.69	2071.18	1962.61
RLTA1_RS29840	1271.14	1.43489	0.27396	5.23757	1.62702e-07	7.58807e-06	1771	1846	1630	725	476	919	1951.58	1924.07	1690.76	717.465	395.143	947.788
RLTA1_RS23090	2610.24	0.768842	0.146939	5.23241	1.67316e-07	7.7471e-06	3480	2878	2926	1830	2384	1941	3834.85	2999.72	3035.07	1810.98	1979.04	2001.8
RLTA1_RS15745	3396.79	0.744485	0.142457	5.22603	1.7319e-07	7.96181e-06	3617	4432	4009	2637	3371	2142	3985.82	4619.44	4158.44	2609.59	2798.38	2209.1
RLTA1_RS11090	1909.38	-0.603865	0.115939	-5.20848	1.90398e-07	8.69081e-06	1441	1360	1486	2422	2796	2125	1587.94	1417.52	1541.39	2396.83	2321.05	2191.57
RLTA1_RS18600	870.015	-0.7034	0.135119	-5.20578	1.9318e-07	8.75569e-06	575	600	701	1003	1362	1077	633.631	625.375	727.13	992.576	1130.64	1110.74
RLTA1_RS28075	1415.93	0.678693	0.130538	5.19919	2.00164e-07	9.00878e-06	1600	1809	1524	1123	1372	985	1763.15	1885.51	1580.81	1111.33	1138.94	1015.86
RLTA1_RS28970	724.632	0.891122	0.171494	5.19623	2.03366e-07	9.08933e-06	789	874	1006	458	553	593	869.453	910.963	1043.5	453.24	459.064	611.576
RLTA1_RS00805	11003.1	0.80191	0.155013	5.17317	2.30156e-07	1.02157e-05	11951	12761	14928	8732	10498	6504	13169.6	13300.7	15484.4	8641.25	8714.74	6707.74
RLTA1_RS10120	3251.66	1.47568	0.285721	5.16476	2.4075e-07	1.06128e-05	3900	5246	4420	2524	2004	968	4297.67	5467.86	4584.76	2497.77	1663.59	998.323
RLTA1_RS20870	5990.07	-0.72251	0.139944	-5.16286	2.43206e-07	1.06481e-05	4281	4018	4490	6652	10119	7170	4717.52	4187.93	4657.36	6582.87	8400.12	7394.61
RLTA1_RS13405	2590.12	0.851599	0.165243	5.15361	2.55518e-07	1.11116e-05	2652	3569	3237	1967	2471	1496	2922.42	3719.94	3357.66	1946.56	2051.26	1542.86
RLTA1_RS25445	2600.48	0.675774	0.131273	5.14784	2.63497e-07	1.13817e-05	3016	2922	3110	1946	2209	2180	3323.53	3045.58	3225.93	1925.78	1833.76	2248.29
RLTA1_RS06715	701.125	-0.687663	0.133693	-5.14359	2.6953e-07	1.15646e-05	482	482	557	810	1054	891	531.148	502.385	577.762	801.582	874.96	918.911
RLTA1_RS05060	393.508	-0.783552	0.152731	-5.13026	2.89346e-07	1.23327e-05	246	287	287	453	671	473	271.084	299.138	297.698	448.292	557.019	487.817
RLTA1_RS29845	1292.15	1.55608	0.303991	5.11883	3.07441e-07	1.30177e-05	2042	1914	1484	727	420	873	2250.22	1994.95	1539.32	719.445	348.656	900.347
RLTA1_RS28055	2443.34	0.699751	0.137186	5.10075	3.38302e-07	1.42308e-05	2690	3056	2820	1902	2498	1580	2964.29	3185.24	2925.12	1882.23	2073.67	1629.49
RLTA1_RS12990	1906.28	0.955377	0.187985	5.08221	3.73073e-07	1.55915e-05	2222	2753	2147	1355	1229	1485	2448.57	2869.43	2227.03	1340.92	1020.23	1531.52
RLTA1_RS23105	1257.1	0.813619	0.160287	5.07601	3.85435e-07	1.60043e-05	1404	1683	1453	892	1286	760	1547.16	1754.18	1507.16	882.73	1067.55	783.808
RLTA1_RS29930	482.966	0.69757	0.137514	5.0727	3.92205e-07	1.6181e-05	538	562	591	391	398	377	592.859	585.768	613.03	386.937	330.393	388.81
RLTA1_RS22005	1076.46	0.658293	0.130048	5.06192	4.15065e-07	1.69736e-05	1085	1293	1360	839	1063	768	1195.64	1347.68	1410.69	830.281	882.431	792.058
RLTA1_RS23135	2663.34	0.710477	0.140378	5.06117	4.16691e-07	1.69736e-05	3467	2978	2887	1995	2509	1943	3820.52	3103.95	2994.61	1974.27	2082.8	2003.87
RLTA1_RS21800	1258.89	-0.577288	0.114332	-5.04924	4.43579e-07	1.79552e-05	873	960	1030	1528	1862	1420	962.018	1000.6	1068.39	1512.12	1545.71	1464.48
RLTA1_RS17695	7269.78	-1.06608	0.2117	-5.03582	4.75811e-07	1.91395e-05	5458	3400	4378	10846	12583	8087	6014.54	3543.79	4541.19	10733.3	10445.6	8340.33
RLTA1_RS12380	2535.53	-1.24533	0.247364	-5.03439	4.7937e-07	1.91629e-05	1602	1164	1480	4296	4961	2259	1765.35	1213.23	1535.17	4251.35	4118.29	2329.76
RLTA1_RS23060	276.559	-0.811156	0.161189	-5.03233	4.84545e-07	1.92502e-05	175	171	223	353	435	336	192.844	178.232	231.312	349.331	361.108	346.525
RLTA1_RS21885	1631.9	-0.608164	0.120921	-5.02944	4.91926e-07	1.94235e-05	1127	1214	1322	1867	2359	2043	1241.92	1265.34	1371.28	1847.6	1958.28	2107
RLTA1_RS05735	2295.01	0.588261	0.117408	5.01038	5.43236e-07	2.13187e-05	2377	2825	2609	1857	2322	1682	2619.38	2944.47	2706.25	1837.7	1927.57	1734.69
RLTA1_RS17380	4461.42	-0.652122	0.130314	-5.00422	5.60894e-07	2.18783e-05	3151	3188	3485	4841	7000	5582	3472.3	3322.83	3614.9	4790.69	5810.93	5756.86
RLTA1_RS06265	1679.7	-0.610087	0.12216	-4.99418	5.90861e-07	2.29083e-05	1233	1173	1357	2126	2305	2009	1358.73	1222.61	1407.58	2103.91	1913.46	2071.93
RLTA1_RS18710	134.214	-0.969728	0.194271	-4.99161	5.98765e-07	2.30758e-05	73	87	97	183	191	188	80.4437	90.6794	100.616	181.098	158.555	193.889
RLTA1_RS02070	4057.76	-0.64599	0.12985	-4.97488	6.52885e-07	2.50117e-05	3136	2801	3006	4669	6469	4715	3455.77	2919.46	3118.05	4620.48	5370.13	4862.7
RLTA1_RS03560	2732.75	0.732541	0.147743	4.9582	7.11495e-07	2.67788e-05	2885	3218	3570	2303	2557	1705	3179.18	3354.1	3703.07	2279.07	2122.65	1758.41
RLTA1_RS13625	809.362	0.640917	0.129248	4.95882	7.09222e-07	2.67788e-05	852	961	982	674	791	556	938.877	1001.64	1018.6	666.995	656.635	573.417
RLTA1_RS23145	2015.61	0.700968	0.141375	4.95823	7.11373e-07	2.67788e-05	2619	2158	2268	1514	1860	1516	2886.05	2249.27	2352.54	1498.27	1544.05	1563.49
RLTA1_RS05615	3059.62	0.766156	0.154788	4.94971	7.43229e-07	2.78106e-05	3253	4203	3465	2161	2491	2513	3584.7	4380.75	3594.16	2138.54	2067.86	2591.72
RLTA1_RS23590	634.651	0.903173	0.182572	4.94694	7.53906e-07	2.8047e-05	824	673	840	536	464	399	908.021	701.462	871.311	530.43	385.182	411.499
RLTA1_RS22260	850.165	-0.627078	0.126904	-4.94137	7.75746e-07	2.86937e-05	590	656	647	1098	1290	910	650.161	683.743	671.117	1086.59	1070.87	938.506
RLTA1_RS30665	1528.78	0.615864	0.12481	4.93441	8.03946e-07	2.95669e-05	1785	1696	1751	1309	1463	1078	1967.01	1767.73	1816.27	1295.4	1214.48	1111.77
RLTA1_RS34390	235.88	0.965233	0.195759	4.93073	8.19237e-07	2.9958e-05	322	299	260	130	206	174	354.834	311.645	269.691	128.649	171.007	179.451
RLTA1_RS08845	1935.33	0.631752	0.128212	4.9274	8.33294e-07	3.02999e-05	2102	2156	2404	1695	1768	1367	2316.34	2247.18	2493.61	1677.38	1467.68	1409.82
RLTA1_RS22475	7647.17	-0.668453	0.135711	-4.92555	8.41231e-07	3.04166e-05	5475	5355	5885	9941	9798	9883	6033.27	5581.47	6104.36	9837.69	8133.64	10192.6
RLTA1_RS07695	17078	-0.683106	0.138887	-4.91843	8.72419e-07	3.13681e-05	12988	10818	13245	19910	26132	21085	14312.4	11275.5	13738.7	19703.1	21693	21745.5
RLTA1_RS04350	407.655	-0.906579	0.184402	-4.91632	8.81842e-07	3.15308e-05	266	233	304	452	746	512	293.123	242.854	315.332	447.303	619.279	528.039
RLTA1_RS21310	1447.35	-0.974509	0.198477	-4.90993	9.11072e-07	3.23959e-05	1029	769	958	2343	2256	1516	1133.92	801.522	993.709	2318.65	1872.78	1563.49
RLTA1_RS11935	347.032	0.705326	0.143923	4.90073	9.54808e-07	3.37645e-05	363	447	409	270	303	265	400.014	465.904	424.245	267.194	251.53	273.301
RLTA1_RS10050	1215.3	1.29886	0.265384	4.89428	9.86662e-07	3.47003e-05	1764	1250	1869	786	1065	431	1943.87	1302.86	1938.67	777.831	884.092	444.501
RLTA1_RS02775	1152.7	0.699383	0.142992	4.89108	1.00286e-06	3.50783e-05	1148	1433	1466	907	956	917	1265.06	1493.6	1520.65	897.574	793.607	945.726
RLTA1_RS33030	1103.18	0.624775	0.127829	4.8876	1.02072e-06	3.55101e-05	1147	1382	1263	851	995	908	1263.96	1440.45	1310.08	842.156	825.982	936.444
RLTA1_RS15945	4297.22	-0.679754	0.139253	-4.88142	1.05322e-06	3.64438e-05	3165	2924	3253	4691	6483	5672	3487.73	3047.66	3374.26	4642.25	5381.75	5849.68
RLTA1_RS30615	455.823	0.686921	0.141457	4.85606	1.19746e-06	4.12132e-05	459	544	592	362	421	330	505.803	567.007	614.067	358.238	349.486	340.337
RLTA1_RS01445	422.579	0.62952	0.12967	4.8548	1.20509e-06	4.12552e-05	489	480	483	329	403	325	538.862	500.3	501.004	325.581	334.544	335.181
RLTA1_RS18275	5579.17	-0.684681	0.141114	-4.85198	1.22235e-06	4.16246e-05	4050	3566	4492	6523	9002	6504	4462.97	3716.81	4659.44	6455.21	7472.86	6707.74
RLTA1_RS06145	3022.52	0.553427	0.114223	4.84516	1.26509e-06	4.28531e-05	3170	3442	3571	2408	2797	2565	3493.24	3587.57	3704.11	2382.97	2321.88	2645.35
RLTA1_RS03575	1008.83	-0.699764	0.144462	-4.84394	1.27287e-06	4.28911e-05	746	632	796	1322	1419	1222	822.068	658.728	825.671	1308.26	1177.96	1260.28
RLTA1_RS12165	191.269	0.889744	0.183869	4.839	1.30495e-06	4.37429e-05	244	255	203	124	158	144	268.88	265.784	210.567	122.711	131.161	148.511
RLTA1_RS07630	709.538	-0.744786	0.154084	-4.83365	1.34055e-06	4.47036e-05	536	466	496	865	972	973	590.655	485.708	514.488	856.01	806.889	1003.48
RLTA1_RS29835	2502.28	0.941863	0.195078	4.82813	1.37821e-06	4.57224e-05	3062	2866	3385	1806	1538	2014	3374.23	2987.21	3511.18	1787.23	1276.74	2077.09
RLTA1_RS27515	1824.83	-0.868711	0.179966	-4.8271	1.38539e-06	4.5725e-05	1176	1055	1426	2572	3140	1864	1295.91	1099.62	1479.15	2545.27	2606.62	1922.39
RLTA1_RS18655	150.236	1.10585	0.2292	4.82484	1.40119e-06	4.60105e-05	186	173	222	123	112	69	204.966	180.316	230.275	121.722	92.9749	71.1615
RLTA1_RS11215	610.835	0.695606	0.144305	4.82038	1.43285e-06	4.68114e-05	613	741	788	458	529	492	675.506	772.338	817.373	453.24	439.14	507.412
RLTA1_RS23955	593.698	-0.84796	0.176049	-4.81663	1.46005e-06	4.74591e-05	337	435	431	653	896	873	371.363	453.397	447.066	646.214	743.799	900.347
RLTA1_RS02860	4666.79	-0.691224	0.143727	-4.80928	1.51478e-06	4.89905e-05	3686	3044	3350	5367	6991	5989	4061.85	3172.74	3474.87	5311.22	5803.46	6176.61
RLTA1_RS25350	3850.88	0.885585	0.184502	4.79987	1.5877e-06	5.1092e-05	4318	4302	5543	2926	3725	2061	4758.3	4483.94	5749.62	2895.59	3092.25	2125.56
RLTA1_RS07805	7380.73	-0.907849	0.189764	-4.78409	1.71768e-06	5.49998e-05	5648	3772	5053	10827	10841	8895	6223.91	3931.52	5241.35	10714.5	8999.47	9173.64
RLTA1_RS07135	849.434	0.616735	0.129211	4.77308	1.81431e-06	5.78063e-05	932	951	1029	691	867	589	1027.03	991.22	1067.36	683.819	719.725	607.451
RLTA1_RS03260	3376.59	0.722763	0.15156	4.76882	1.85308e-06	5.8751e-05	3512	4564	3844	2749	2665	2630	3870.11	4757.02	3987.28	2720.43	2212.3	2712.39
RLTA1_RS07580	1513.34	0.817288	0.171456	4.76676	1.87211e-06	5.90634e-05	1960	1785	1709	1295	1330	874	2159.86	1860.49	1772.7	1281.54	1104.08	901.379
RLTA1_RS22345	1539.79	0.62845	0.132197	4.7539	1.99526e-06	6.26413e-05	1596	1817	1886	1325	1301	1201	1758.74	1893.84	1956.3	1311.23	1080	1238.62
RLTA1_RS01685	800.208	0.62238	0.131231	4.74263	2.10959e-06	6.55911e-05	846	894	1009	678	766	566	932.265	931.809	1046.61	670.954	635.882	583.73
RLTA1_RS12285	3153.16	0.969755	0.204444	4.74337	2.10196e-06	6.55911e-05	4459	3214	4107	2627	2090	1998	4913.67	3349.93	4260.09	2599.7	1734.98	2060.59
RLTA1_RS15655	2667.03	-0.701243	0.147975	-4.73894	2.1484e-06	6.6269e-05	1950	1797	1998	2830	4273	3452	2148.84	1873	2072.48	2800.59	3547.16	3560.14
RLTA1_RS35045	5113.37	0.618293	0.13048	4.7386	2.15199e-06	6.6269e-05	5205	6698	5650	3904	4860	4077	5735.74	6981.27	5860.6	3863.43	4034.45	4204.71
RLTA1_RS18270	8223.76	-0.71058	0.15021	-4.73056	2.23897e-06	6.86192e-05	6434	4979	6205	10292	12750	9558	7090.06	5189.57	6436.29	10185	10584.2	9857.41
RLTA1_RS24110	1005.05	-0.654611	0.138465	-4.72764	2.27149e-06	6.92858e-05	716	704	791	1175	1663	1109	789.009	733.773	820.484	1162.79	1380.51	1143.74
RLTA1_RS33695	6943.87	0.774482	0.16394	4.72417	2.31052e-06	7.0144e-05	7140	8995	8724	6067	6120	4156	7868.05	9375.42	9049.19	6003.95	5080.41	4286.19
RLTA1_RS27860	901.167	0.620191	0.132218	4.69068	2.72294e-06	8.22764e-05	927	1110	1057	738	778	733	1021.52	1156.94	1096.4	730.33	645.844	755.962
RLTA1_RS00380	2511.34	0.56898	0.121479	4.68377	2.81644e-06	8.39195e-05	2478	3005	3025	2147	2414	1880	2730.68	3132.09	3137.76	2124.69	2003.94	1938.89
RLTA1_RS02865	3104.08	-0.600608	0.128188	-4.68536	2.79474e-06	8.39195e-05	2124	2442	2425	3369	4636	3918	2340.58	2545.28	2515.39	3333.99	3848.5	4040.73
RLTA1_RS21630	210.972	-1.05938	0.226139	-4.68462	2.80481e-06	8.39195e-05	125	154	108	233	323	346	137.746	160.513	112.026	230.579	268.133	356.839
RLTA1_RS28770	250.571	-0.95572	0.204349	-4.67689	2.91258e-06	8.63841e-05	133	201	150	298	468	299	146.562	209.501	155.591	294.903	388.502	308.366
RLTA1_RS28070	605.834	0.722433	0.154561	4.6741	2.95239e-06	8.71633e-05	671	804	662	430	622	416	739.42	838.003	686.676	425.531	516.343	429.031
RLTA1_RS01765	780.609	-0.770311	0.164916	-4.67094	2.99827e-06	8.81136e-05	488	504	644	859	1268	1018	537.76	525.315	668.005	850.073	1052.61	1049.89
RLTA1_RS18280	1201.22	0.652372	0.139758	4.66788	3.04321e-06	8.90277e-05	1237	1443	1482	1068	1056	843	1363.13	1504.03	1537.24	1056.9	876.62	869.408
RLTA1_RS12530	863.772	-0.683507	0.146479	-4.66625	3.06745e-06	8.93309e-05	628	565	682	1167	1151	1051	692.036	588.895	707.422	1154.87	955.483	1083.92
RLTA1_RS17995	157.996	0.845571	0.181275	4.66458	3.09243e-06	8.96526e-05	161	212	203	122	135	103	177.417	220.966	210.567	120.732	112.068	106.227
RLTA1_RS11380	2572.69	-1.07378	0.230714	-4.65416	3.25307e-06	9.38867e-05	1768	1216	1693	4317	4377	2481	1948.28	1267.43	1756.11	4272.14	3633.49	2558.72
RLTA1_RS05065	1043.11	-0.630515	0.135629	-4.64881	3.33856e-06	9.5924e-05	787	750	779	1216	1705	1147	867.249	781.719	808.037	1203.36	1415.38	1182.93
RLTA1_RS11440	7832.44	0.634138	0.136734	4.63774	3.52233e-06	0.000100288	7801	8984	10237	6197	6823	6418	8596.45	9363.95	10618.6	6132.6	5664	6619.05
RLTA1_RS24470	6101.48	-1.01295	0.218456	-4.63687	3.53719e-06	0.000100288	4314	2967	4130	10046	9840	6175	4753.89	3092.48	4283.95	9941.6	8168.51	6368.44
RLTA1_RS33010	583.969	0.585891	0.126333	4.63767	3.52364e-06	0.000100288	637	710	637	489	552	445	701.953	740.027	660.744	483.918	458.233	458.94
RLTA1_RS22405	2262.29	-0.584997	0.126245	-4.63382	3.58974e-06	0.00010122	1675	1568	1879	2874	3099	2645	1845.8	1634.31	1949.04	2844.13	2572.58	2727.86
RLTA1_RS28975	704.802	0.657323	0.141874	4.63314	3.60153e-06	0.00010122	763	815	866	483	728	541	840.801	849.468	898.28	477.98	604.337	557.947
RLTA1_RS30115	2107.57	0.625155	0.135171	4.62492	3.74746e-06	0.000104864	2096	2759	2397	1710	2067	1518	2309.72	2875.68	2486.35	1692.23	1715.89	1565.55
RLTA1_RS07720	14038.6	-0.79171	0.171333	-4.62088	3.82113e-06	0.000106462	10825	7691	10505	17218	22265	17325	11928.8	8016.27	10896.6	17039.1	18482.9	17867.7
RLTA1_RS25440	1465.72	0.650343	0.140901	4.61559	3.91982e-06	0.000108741	1733	1496	1834	1154	1283	1179	1909.71	1559.27	1902.36	1142.01	1065.06	1215.93
RLTA1_RS15080	1628.98	0.549626	0.119221	4.61016	4.02368e-06	0.000111143	1800	1796	1882	1345	1706	1182	1983.54	1871.96	1952.15	1331.02	1416.21	1219.03
RLTA1_RS24730	1994.32	0.558691	0.121221	4.60885	4.04911e-06	0.000111368	2080	2357	2292	1614	1794	1700	2292.09	2456.68	2377.43	1597.23	1489.26	1753.25
RLTA1_RS23960	328.741	-0.786071	0.170592	-4.6079	4.06762e-06	0.000111401	216	249	218	373	472	473	238.025	259.531	226.126	369.124	391.823	487.817
RLTA1_RS04705	714.518	0.638909	0.139483	4.58056	4.63723e-06	0.000126463	732	924	810	560	631	581	806.64	963.078	840.193	554.18	523.814	599.2
RLTA1_RS32815	1415.61	-0.615157	0.134335	-4.57929	4.66561e-06	0.0001267	1008	1025	1133	1916	1852	1654	1110.78	1068.35	1175.23	1896.09	1537.41	1705.81
RLTA1_RS26905	246.377	0.756152	0.16544	4.57055	4.86437e-06	0.000131542	257	292	328	193	197	190	283.206	304.349	340.226	190.994	163.536	195.952
RLTA1_RS24105	2018.22	-0.590879	0.129713	-4.55529	5.23127e-06	0.000140872	1397	1446	1721	2287	3009	2440	1539.45	1507.15	1785.15	2263.23	2497.87	2516.43
RLTA1_RS07420	649.616	0.642046	0.141181	4.54768	5.424e-06	0.000145454	815	699	722	516	601	497	898.104	728.562	748.913	510.637	498.91	512.569
RLTA1_RS07325	463.811	-0.806657	0.177443	-4.54601	5.46728e-06	0.000146006	251	350	357	547	669	654	276.594	364.802	370.307	541.315	555.359	674.487
RLTA1_RS04830	892.798	0.57576	0.126861	4.5385	5.66557e-06	0.000150676	963	1040	1022	795	798	681	1061.2	1083.98	1060.1	786.738	662.446	702.333
RLTA1_RS10705	520.766	1.20526	0.265771	4.53494	5.76198e-06	0.000152609	582	809	670	442	373	192	641.345	843.214	694.974	437.407	309.64	198.015
RLTA1_RS07740	9663.31	-0.583376	0.128749	-4.5311	5.86785e-06	0.000154777	7717	6814	7328	11226	13407	12153	8503.89	7102.18	7601.15	11109.3	11129.6	12533.7
RLTA1_RS22670	28139.9	1.26867	0.280883	4.51672	6.28034e-06	0.000164981	44641	30012	37448	20596	23441	9386	49192.9	31281.3	38843.9	20382	19459.1	9680.02
RLTA1_RS28870	1986.18	-0.563287	0.12476	-4.51498	6.33227e-06	0.000165669	1503	1404	1630	2385	3028	2165	1656.26	1463.38	1690.76	2360.21	2513.64	2232.82
RLTA1_RS33020	781.475	0.594733	0.131762	4.51369	6.37082e-06	0.000166002	929	885	844	632	789	569	1023.73	922.428	875.46	625.432	654.975	586.824
RLTA1_RS23115	4247.49	0.661759	0.14686	4.50606	6.60414e-06	0.000171388	5311	4978	4410	3013	4303	3215	5852.55	5188.53	4574.38	2981.69	3572.06	3315.71
RLTA1_RS33025	982.185	0.575491	0.12796	4.49742	6.87821e-06	0.000177784	990	1110	1233	803	990	727	1090.95	1156.94	1278.96	794.655	821.832	749.774
RLTA1_RS00860	995.786	0.710112	0.157928	4.49644	6.91021e-06	0.000177896	1132	1232	1134	911	836	651	1247.43	1284.1	1176.27	901.532	693.991	671.393
RLTA1_RS09630	10613.6	0.644741	0.143717	4.48618	7.25112e-06	0.000184459	12805	11399	12387	8772	10829	6953	14110.7	11881.1	12848.7	8680.84	8989.51	7170.81
RLTA1_RS19655	3476.99	-0.542062	0.120821	-4.4865	7.24019e-06	0.000184459	2712	2442	2854	4061	4950	4111	2988.54	2545.28	2960.38	4018.8	4109.16	4239.78
RLTA1_RS28830	567.031	-0.714885	0.159336	-4.48664	7.23557e-06	0.000184459	398	409	408	594	877	774	438.583	426.297	423.208	587.827	728.027	798.246
RLTA1_RS28020	2369.58	0.517686	0.115556	4.47997	7.46532e-06	0.000189161	2516	2754	2629	2119	2191	1873	2772.55	2870.47	2727	2096.98	1818.82	1931.67
RLTA1_RS01760	624.12	-0.718799	0.160629	-4.47491	7.64441e-06	0.000192939	387	469	482	662	992	825	426.462	488.835	499.967	655.12	823.492	850.844
RLTA1_RS27060	510.089	0.567382	0.12688	4.47181	7.7561e-06	0.000194993	561	591	572	437	496	377	618.204	615.994	593.321	432.458	411.746	388.81
RLTA1_RS24650	1512.98	-0.960337	0.215024	-4.46618	7.96277e-06	0.00019941	1050	773	1079	2417	2509	1475	1157.07	805.692	1119.22	2391.88	2082.8	1521.21
RLTA1_RS34360	9899.84	0.93284	0.209255	4.45792	8.27599e-06	0.000206451	12239	11398	13123	8454	5774	7040	13487	11880	13612.2	8366.14	4793.19	7260.53
RLTA1_RS01865	919.27	-0.732094	0.164528	-4.44965	8.60095e-06	0.000213729	641	557	758	1115	1543	1026	706.361	580.557	786.254	1103.41	1280.9	1058.14
RLTA1_RS02590	3120.9	-1.02547	0.230561	-4.4477	8.67936e-06	0.000214848	2220	1597	1984	5354	5102	2931	2446.37	1664.54	2057.95	5298.36	4235.34	3022.82
RLTA1_RS02830	360.907	-0.667319	0.150291	-4.44018	8.98826e-06	0.000221641	277	244	267	466	490	447	305.245	254.319	276.952	461.157	406.765	461.003
RLTA1_RS23130	638.149	0.78161	0.17671	4.42311	9.72908e-06	0.000238519	864	757	656	468	633	406	952.1	789.015	680.452	463.136	525.474	418.718
RLTA1_RS25090	1178.23	0.841836	0.190344	4.42272	9.7468e-06	0.000238519	1510	1501	1262	1066	912	698	1663.97	1564.48	1309.04	1054.92	757.081	719.865
RLTA1_RS25915	842.418	-1.0156	0.229922	-4.41714	1.00014e-05	0.000243822	645	403	523	1203	1578	854	710.769	420.044	542.495	1190.5	1309.95	880.752
RLTA1_RS11500	6284.73	-0.654501	0.148534	-4.40642	1.05093e-05	0.000254631	4896	4059	4843	7037	9195	8205	5395.23	4230.66	5023.52	6963.87	7633.07	8462.03
RLTA1_RS18255	3878.38	-0.796159	0.180694	-4.40612	1.05239e-05	0.000254631	2842	2335	2833	5754	6175	3826	3131.79	2433.75	2938.6	5694.2	5126.07	3945.85
RLTA1_RS23030	6322.42	-0.698828	0.158708	-4.40323	1.06651e-05	0.000257081	4523	3898	5220	8258	10114	6695	4984.2	4062.85	5414.58	8172.18	8395.97	6904.73
RLTA1_RS19890	2430.79	0.455816	0.103569	4.4011	1.07702e-05	0.000258646	2460	2749	2756	2118	2472	1941	2710.84	2865.26	2858.73	2095.99	2052.09	2001.8
RLTA1_RS34370	114.119	0.964373	0.219163	4.40026	1.08124e-05	0.000258693	120	157	151	62	94	90	132.236	163.64	156.629	61.3557	78.0325	92.8193
RLTA1_RS23140	140.035	0.784714	0.178377	4.39919	1.08656e-05	0.000259003	176	161	164	105	127	96	193.946	167.809	170.113	103.909	105.427	99.0073
RLTA1_RS21315	1219.98	-0.619399	0.140929	-4.3951	1.10722e-05	0.000261987	923	793	1005	1563	1726	1410	1017.12	826.537	1042.46	1546.76	1432.81	1454.17
RLTA1_RS34795	599.662	0.584084	0.132891	4.39521	1.10667e-05	0.000261987	618	739	681	473	550	500	681.016	770.254	706.384	468.084	456.573	515.663
RLTA1_RS17960	614.921	0.577622	0.1315	4.39256	1.12021e-05	0.000264091	610	716	762	514	582	474	672.2	746.281	790.404	508.658	483.137	488.848
RLTA1_RS00975	1757.53	0.620543	0.141544	4.38409	1.16473e-05	0.000273584	1732	2231	2077	1459	1494	1428	1908.61	2325.35	2154.42	1443.84	1240.22	1472.73
RLTA1_RS21975	343.486	-0.631805	0.144503	-4.37227	1.22963e-05	0.000286736	265	257	240	419	528	387	292.021	267.869	248.946	414.646	438.31	399.123
RLTA1_RS29820	4575.98	-1.2505	0.285995	-4.37246	1.22853e-05	0.000286736	3721	1660	2212	6494	6652	7158	4100.42	1730.2	2294.45	6426.51	5522.05	7382.23
RLTA1_RS13400	1380.62	0.575255	0.131963	4.3592	1.30541e-05	0.000303307	1489	1745	1443	1100	1283	1138	1640.83	1818.8	1496.79	1088.57	1065.06	1173.65
RLTA1_RS01170	290.988	-0.786165	0.181152	-4.33981	1.42607e-05	0.00033015	189	170	246	351	431	388	208.272	177.19	255.17	347.352	357.787	400.154
RLTA1_RS06725	624.295	-0.561088	0.129574	-4.33024	1.48945e-05	0.000343587	446	462	521	715	946	717	491.478	481.539	540.42	707.569	785.306	739.461
RLTA1_RS29610	698.697	0.570687	0.131975	4.32421	1.53078e-05	0.00035186	781	815	766	559	626	596	860.637	849.468	794.553	553.191	519.663	614.67
RLTA1_RS28865	424.669	-0.630699	0.146056	-4.3182	1.57309e-05	0.000359666	271	329	345	499	601	539	298.633	342.914	357.86	493.814	498.91	555.885
RLTA1_RS29815	1970.94	-1.17464	0.272047	-4.3178	1.57592e-05	0.000359666	1533	819	1049	2477	4281	2123	1689.32	853.637	1088.1	2451.26	3553.8	2189.5
RLTA1_RS11240	20407.1	0.977396	0.226648	4.31239	1.61497e-05	0.000366147	26384	22561	27583	18999	14304	10245	29074.3	23515.1	28611.2	18801.6	11874.2	10565.9
RLTA1_RS12895	195.221	0.885604	0.205367	4.31229	1.61569e-05	0.000366147	216	247	254	147	124	159	238.025	257.446	263.468	145.472	102.936	163.981
RLTA1_RS07120	1892.5	-0.72345	0.16791	-4.30855	1.64327e-05	0.000370921	1500	1154	1376	2672	2526	2260	1652.95	1202.8	1427.29	2644.23	2096.92	2330.8
RLTA1_RS25100	1981.3	0.775798	0.180088	4.30788	1.64828e-05	0.000370921	2383	2644	2046	1770	1496	1348	2625.99	2755.82	2122.26	1751.61	1241.88	1390.23
RLTA1_RS17225	925.543	0.623696	0.145032	4.3004	1.70488e-05	0.000382322	1002	995	1183	664	977	695	1104.17	1037.08	1227.1	657.099	811.04	716.771
RLTA1_RS10575	659.601	0.618751	0.144221	4.2903	1.78436e-05	0.000398754	806	777	674	508	648	504	888.186	809.861	699.123	502.721	537.926	519.788
RLTA1_RS12020	403.611	-0.80919	0.188783	-4.28635	1.81635e-05	0.000402815	315	253	260	559	682	409	347.12	263.7	269.691	553.191	566.151	421.812
RLTA1_RS23795	525.738	0.65352	0.152487	4.28574	1.82131e-05	0.000402815	519	650	655	435	523	350	571.921	677.49	679.415	430.479	434.16	360.964
RLTA1_RS26210	1216.88	0.542273	0.126495	4.28691	1.81174e-05	0.000402815	1202	1489	1400	943	1223	993	1324.57	1551.97	1452.18	933.2	1015.25	1024.11
RLTA1_RS06080	154.378	-0.975683	0.228335	-4.27302	1.9284e-05	0.00042504	102	91	101	170	218	257	112.401	94.8486	104.765	168.233	180.969	265.051
RLTA1_RS15445	552.692	-1.27683	0.29897	-4.27077	1.948e-05	0.000427894	391	200	318	929	1111	490	430.869	208.458	329.853	919.345	922.278	505.35
RLTA1_RS17690	575.237	-0.878013	0.206389	-4.25417	2.09829e-05	0.00045934	382	434	331	574	1081	746	420.952	452.355	343.338	568.035	897.374	769.369
RLTA1_RS00515	4296.15	-0.684659	0.161223	-4.24667	2.16971e-05	0.000473365	3321	2680	3310	6115	5899	4792	3659.64	2793.34	3433.38	6051.45	4896.95	4942.11
RLTA1_RS22735	5538.97	-0.911565	0.214809	-4.2436	2.19959e-05	0.000476652	4011	2848	3998	8835	8839	5447	4419.99	2968.45	4147.03	8743.18	7337.55	5617.63
RLTA1_RS28375	5674.88	0.543772	0.128136	4.2437	2.19867e-05	0.000476652	6136	6375	6546	5012	5849	3915	6761.67	6644.61	6790	4959.91	4855.45	4037.64
RLTA1_RS02090	4758.31	0.518807	0.122391	4.23894	2.24581e-05	0.000485034	4690	5514	5686	4143	4344	3908	5168.23	5747.2	5897.95	4099.94	3606.1	4030.42
RLTA1_RS32795	1852.79	0.71255	0.16865	4.22501	2.38933e-05	0.000514305	1691	2575	2272	1386	1831	1281	1863.43	2683.9	2356.69	1371.6	1519.97	1321.13
RLTA1_RS01325	260.284	-0.791636	0.188125	-4.20802	2.57614e-05	0.000552667	186	178	175	398	391	263	204.966	185.528	181.523	393.864	324.582	271.239
RLTA1_RS14990	1941.73	0.684615	0.162773	4.20595	2.59984e-05	0.000555899	1920	2480	2393	1442	2101	1257	2115.78	2584.88	2482.2	1427.01	1744.11	1296.38
RLTA1_RS08335	148.927	0.894697	0.212865	4.20312	2.6326e-05	0.00056104	165	201	182	117	94	116	181.825	209.501	188.784	115.784	78.0325	119.634
RLTA1_RS23455	1411.47	0.557218	0.132706	4.19889	2.68221e-05	0.000569726	1377	1703	1687	1215	1417	1016	1517.41	1775.02	1749.88	1202.37	1176.3	1047.83
RLTA1_RS01820	803.034	-0.54299	0.129411	-4.19588	2.71819e-05	0.00057547	593	575	683	927	1196	918	653.467	599.318	708.459	917.366	992.839	946.757
RLTA1_RS06780	852.846	-0.843891	0.201464	-4.1888	2.80436e-05	0.000591767	578	524	625	1214	1543	779	636.937	546.161	648.297	1201.38	1280.9	803.403
RLTA1_RS06365	1749.52	-0.706987	0.168819	-4.18783	2.81629e-05	0.000592341	1295	1156	1307	1811	2604	2478	1427.05	1204.89	1355.72	1792.18	2161.67	2555.63
RLTA1_RS01870	689.075	-0.666332	0.159187	-4.18585	2.84098e-05	0.000594871	513	439	555	757	1115	835	565.309	457.566	575.688	749.133	925.598	861.157
RLTA1_RS11290	1003.78	-0.525496	0.125555	-4.18539	2.8468e-05	0.000594871	724	767	840	1122	1407	1237	797.825	799.438	871.311	1110.34	1168	1275.75
RLTA1_RS03000	1514.13	0.721288	0.172406	4.18365	2.8686e-05	0.000597485	1716	1810	1809	1405	1110	1085	1890.98	1886.55	1876.43	1390.4	921.448	1118.99
RLTA1_RS23170	792.52	0.679208	0.162524	4.17912	2.9264e-05	0.000607559	955	913	891	530	867	565	1052.38	951.612	924.212	524.492	719.725	582.699
RLTA1_RS04985	1021.83	0.610622	0.146316	4.17331	3.002e-05	0.000621249	1121	1182	1192	918	827	807	1235.31	1231.99	1236.43	908.46	686.52	832.28
RLTA1_RS12535	2851.95	0.639067	0.153965	4.15074	3.31403e-05	0.000683626	3719	3059	3021	2298	2485	2283	4098.22	3188.37	3133.61	2274.12	2062.88	2354.52
RLTA1_RS05730	7602.59	0.857888	0.206764	4.14911	3.33767e-05	0.000686301	8152	10419	9210	6922	6491	3860	8983.24	10859.6	9553.3	6850.06	5388.39	3980.92
RLTA1_RS20280	467.128	0.538819	0.130069	4.14256	3.43448e-05	0.000703959	478	565	525	382	470	363	526.741	588.895	544.569	378.03	390.163	374.371
RLTA1_RS15245	4573.61	0.546864	0.132183	4.13716	3.51631e-05	0.000718398	5052	5495	4816	4148	4082	3547	5567.14	5727.39	4995.52	4104.89	3388.6	3658.11
RLTA1_RS23020	38637.3	0.867813	0.209797	4.13645	3.52725e-05	0.000718398	49808	42649	48607	32208	23191	30001	54886.8	44452.7	50418.8	31873.3	19251.6	30940.8
RLTA1_RS17625	1572.17	0.704972	0.170557	4.13336	3.57502e-05	0.000725831	1859	1957	1694	1337	1150	1270	2048.56	2039.77	1757.14	1323.11	954.653	1309.78
RLTA1_RS03695	2777.63	-0.66681	0.161657	-4.12484	3.70987e-05	0.000750841	1965	2068	2043	3610	3300	3795	2165.37	2155.46	2119.15	3572.48	2739.44	3913.88
RLTA1_RS06965	1253.64	0.651922	0.158205	4.12075	3.77636e-05	0.000760194	1295	1514	1535	1038	1319	778	1427.05	1578.03	1592.22	1027.21	1094.95	802.371
RLTA1_RS13975	4214.25	1.12852	0.273875	4.12055	3.77971e-05	0.000760194	5541	5312	5502	4052	2611	1705	6106	5536.65	5707.09	4009.89	2167.48	1758.41
RLTA1_RS09640	11709.7	0.459831	0.111624	4.11947	3.79745e-05	0.000760212	12499	12541	13339	10339	12355	8813	13773.5	13071.4	13836.2	10231.6	10256.3	9089.07
RLTA1_RS17715	808.727	0.681899	0.165545	4.11911	3.80342e-05	0.000760212	929	976	913	631	614	708	1023.73	1017.28	947.032	624.442	509.702	730.179
RLTA1_RS02850	1326.32	-0.573033	0.139333	-4.11269	3.91069e-05	0.000779232	1053	911	1050	1487	1889	1667	1160.37	949.528	1089.14	1471.55	1568.12	1719.22
RLTA1_RS08230	3216	0.457367	0.11129	4.1097	3.96175e-05	0.00078697	3519	3546	3462	2901	3242	2491	3877.82	3695.97	3591.05	2870.85	2691.29	2569.03
RLTA1_RS23340	161.143	-0.676853	0.164732	-4.10882	3.97689e-05	0.000787547	114	116	121	203	236	192	125.624	120.906	125.51	200.89	195.911	198.015
RLTA1_RS29935	1123.64	0.56462	0.137771	4.09826	4.16268e-05	0.000821811	1084	1318	1401	907	1023	944	1194.53	1373.74	1453.22	897.574	849.226	973.571
RLTA1_RS23200	1346.65	0.604772	0.147893	4.08924	4.32783e-05	0.000851801	1604	1354	1635	1179	1279	947	1767.56	1411.26	1695.94	1166.75	1061.74	976.665
RLTA1_RS10855	1311.54	0.624996	0.152876	4.08826	4.34618e-05	0.000852806	1299	1773	1440	1042	1147	1079	1431.46	1847.98	1493.68	1031.17	952.163	1112.8
RLTA1_RS28575	2698.32	0.443921	0.108811	4.07973	4.50875e-05	0.000876974	2715	2963	3133	2351	2626	2282	2991.84	3088.31	3249.78	2326.57	2179.93	2353.49
RLTA1_RS28875	3604.86	-0.446512	0.109434	-4.08021	4.49958e-05	0.000876974	2781	2791	3066	4121	4844	4243	3064.57	2909.04	3180.29	4078.17	4021.16	4375.92
RLTA1_RS34315	1438.9	0.576035	0.141197	4.07966	4.51023e-05	0.000876974	1594	1788	1492	1050	1508	1139	1756.54	1863.62	1547.61	1039.09	1251.84	1174.68
RLTA1_RS25945	1141.21	0.512788	0.125803	4.07613	4.57909e-05	0.000887682	1110	1302	1393	974	1088	926	1223.18	1357.06	1444.92	963.878	903.185	955.008
RLTA1_RS35190	803.756	0.639976	0.157289	4.06878	4.72602e-05	0.000913414	821	865	1091	583	836	595	904.716	901.582	1131.67	576.941	693.991	613.639
RLTA1_RS22355	593.018	-0.518311	0.12745	-4.06676	4.76707e-05	0.000918588	468	444	467	743	817	661	515.721	462.778	484.407	735.278	678.219	681.706
RLTA1_RS32875	1291.1	-0.588197	0.144742	-4.06377	4.82868e-05	0.000927684	962	954	1003	1749	1921	1286	1060.09	994.346	1040.39	1730.82	1594.69	1326.28
RLTA1_RS02080	6858.96	-0.44074	0.108582	-4.05904	4.92747e-05	0.000942083	5469	5277	5718	7659	9443	8026	6026.66	5500.17	5931.14	7579.4	7838.95	8277.42
RLTA1_RS15240	8622.32	0.546333	0.134628	4.05809	4.94755e-05	0.000942083	10304	9179	9433	7539	7629	7014	11354.7	9567.2	9784.61	7460.65	6333.08	7233.72
RLTA1_RS26915	476.988	0.533759	0.13151	4.05869	4.93486e-05	0.000942083	489	532	578	402	483	359	538.862	554.499	599.545	397.822	400.954	370.246
RLTA1_RS25815	362.481	-0.603714	0.148801	-4.05719	4.96658e-05	0.000942918	260	270	285	394	577	429	286.512	281.419	295.623	389.905	478.987	442.439
RLTA1_RS28365	4014.78	0.493202	0.121696	4.05275	5.062e-05	0.000958207	4300	4738	4248	3665	3907	3040	4738.46	4938.38	4406.34	3626.91	3243.33	3135.23
RLTA1_RS12375	2502.36	-0.803593	0.198895	-4.04029	5.33849e-05	0.00100758	1965	1389	1789	3878	3356	2833	2165.37	1447.74	1855.68	3837.7	2785.93	2921.75
RLTA1_RS35785	9546.8	-0.801069	0.198681	-4.03194	5.53174e-05	0.001041	7279	4961	7419	13181	15614	10072	8021.22	5170.81	7695.54	13044	12961.7	10387.5
RLTA1_RS29165	571.45	0.596384	0.148064	4.02788	5.6281e-05	0.00105605	614	712	621	461	487	490	676.608	742.112	644.148	456.209	404.275	505.35
RLTA1_RS07750	4259.33	-0.533449	0.132538	-4.02487	5.70075e-05	0.00106657	3093	3182	3584	4526	6641	4966	3408.39	3316.57	3717.59	4478.96	5512.91	5121.56
RLTA1_RS34415	313.269	0.711477	0.17738	4.01102	6.04567e-05	0.00112782	409	384	305	242	295	221	450.705	400.24	316.369	239.485	244.889	227.923
RLTA1_RS08630	6172.6	0.774955	0.193799	3.99875	6.36782e-05	0.00118449	6424	7229	8447	5263	6090	3293	7079.04	7534.73	8761.86	5208.3	5055.51	3396.16
RLTA1_RS02290	637.225	-0.778793	0.19512	-3.99135	6.5699e-05	0.00121855	465	364	498	869	1093	628	512.415	379.394	516.563	859.969	907.335	647.673
RLTA1_RS01915	1131.28	0.514445	0.128934	3.98997	6.60805e-05	0.00122211	1204	1223	1341	1039	1085	840	1326.77	1274.72	1390.99	1028.2	900.694	866.314
RLTA1_RS25475	2029.28	-0.550418	0.138046	-3.98721	6.68537e-05	0.00123287	1470	1513	1681	2115	3076	2510	1619.89	1576.99	1743.66	2093.02	2553.49	2588.63
RLTA1_RS24930	5564.71	0.951452	0.238949	3.98182	6.83887e-05	0.00125757	6084	6948	7772	5175	4480	2463	6704.37	7241.84	8061.7	5121.22	3719	2540.16
RLTA1_RS19850	14854	-0.408929	0.103318	-3.95796	7.55939e-05	0.0013861	11880	12001	12232	17484	19279	16997	13091.4	12508.5	12687.9	17302.3	16004.1	17529.4
RLTA1_RS28880	7432.26	-0.466826	0.118077	-3.95358	7.69906e-05	0.0014077	6224	5545	5864	8795	10187	8448	6858.65	5779.51	6082.58	8703.6	8456.57	8712.64
RLTA1_RS13860	1717.01	0.930508	0.235473	3.95166	7.76111e-05	0.00141503	1821	2595	1972	1579	1367	822	2006.68	2704.75	2045.51	1562.59	1134.79	847.75
RLTA1_RS24600	741.47	-1.17617	0.298436	-3.94113	8.10979e-05	0.00147442	471	371	443	1137	1692	537	519.027	386.69	459.513	1125.18	1404.59	553.822
RLTA1_RS23825	1514.91	-0.497715	0.126452	-3.93601	8.2849e-05	0.00150202	1173	1099	1283	1826	2236	1607	1292.61	1145.48	1330.82	1807.02	1856.18	1657.34
RLTA1_RS16510	606.64	0.48508	0.123409	3.93068	8.47063e-05	0.00153138	648	692	663	540	602	468	714.075	721.266	687.713	534.388	499.74	482.66
RLTA1_RS11725	4048.19	-0.699356	0.178007	-3.92881	8.53675e-05	0.00153901	3150	2532	3034	6094	5548	4262	3471.2	2639.08	3147.09	6030.67	4605.58	4395.51
RLTA1_RS31180	417.015	-1.10716	0.282057	-3.92532	8.66162e-05	0.00155716	168	277	308	650	845	353	185.131	288.715	319.481	643.245	701.462	364.058
RLTA1_RS17965	279.386	0.614895	0.156681	3.92452	8.69038e-05	0.00155798	283	366	309	221	260	221	311.857	381.479	320.518	218.703	215.835	227.923
RLTA1_RS31175	1604.06	-0.909825	0.232152	-3.91908	8.8886e-05	0.00158908	1040	917	1197	2615	2753	1365	1146.05	955.782	1241.62	2587.82	2285.36	1407.76
RLTA1_RS24965	125.313	-0.769736	0.196723	-3.91278	9.12379e-05	0.00162661	76	89	98	161	211	135	83.7496	92.764	101.653	159.327	175.158	139.229
RLTA1_RS06860	1950.91	0.544611	0.139229	3.91161	9.16844e-05	0.00163006	1890	2466	2209	1740	1887	1428	2082.72	2570.29	2291.34	1721.92	1566.46	1472.73
RLTA1_RS33035	1185.19	0.459767	0.117602	3.90952	9.24797e-05	0.00163967	1296	1293	1294	1029	1257	903	1428.15	1347.68	1342.23	1018.31	1043.48	931.287
RLTA1_RS20750	22953	0.865889	0.22202	3.90006	9.61706e-05	0.00170042	26919	25713	31293	22059	14381	14570	29663.9	26800.5	32459.4	21829.8	11938.1	15026.4
RLTA1_RS07745	2966.49	-0.653883	0.167756	-3.89782	9.70612e-05	0.00170755	2557	1837	2106	3595	4378	3578	2817.73	1914.69	2184.5	3557.64	3634.32	3690.08
RLTA1_RS10275	2720.92	0.560109	0.143702	3.89772	9.71041e-05	0.00170755	2656	3444	3095	2427	2366	2165	2926.83	3589.65	3210.37	2401.78	1964.09	2232.82
RLTA1_RS23100	328.999	0.742846	0.190921	3.89087	9.98873e-05	0.0017517	372	404	391	198	369	228	409.932	421.086	405.575	195.942	306.319	235.142
RLTA1_RS07830	4617.87	-0.514619	0.132337	-3.88869	0.000100788	0.00176269	3492	3438	3835	5194	7372	4885	3848.07	3583.4	3977.95	5140.02	6119.74	5038.03
RLTA1_RS12180	220.277	0.708554	0.182281	3.88715	0.00010143	0.00176911	298	238	235	163	206	164	328.386	248.065	243.76	161.306	171.007	169.137
RLTA1_RS16795	1773.37	0.51951	0.133702	3.88557	0.000102089	0.0017758	1838	2000	2081	1531	1908	1234	2025.42	2084.58	2158.57	1515.09	1583.89	1272.66
RLTA1_RS22810	637.298	-0.733352	0.189087	-3.87838	0.000105154	0.00182418	446	438	471	608	1121	829	491.478	456.524	488.557	601.681	930.579	854.969
RLTA1_RS32780	2990.81	-0.482833	0.12456	-3.87632	0.000106047	0.00183472	2177	2220	2672	3543	4060	3475	2398.98	2313.89	2771.6	3506.18	3370.34	3583.86
RLTA1_RS21440	6495.41	-0.983501	0.254047	-3.87134	0.00010824	0.00186765	4728	3126	4456	10861	11235	5631	5210.1	3258.2	4622.1	10748.1	9326.54	5807.4
RLTA1_RS15235	8108.98	0.496343	0.12829	3.8689	0.000109326	0.00188135	9388	8350	9084	7350	7955	6114	10345.3	8703.14	9422.61	7273.62	6603.71	6305.53
RLTA1_RS19895	47801.8	0.573773	0.14854	3.86275	0.000112116	0.0019242	55055	48783	57879	42882	39993	38420	60668.8	50846.1	60036.4	42436.3	33199.5	39623.5
RLTA1_RS02570	783.872	0.527745	0.136908	3.85475	0.000115848	0.00198297	742	976	908	659	771	615	817.66	1017.28	941.846	652.151	640.033	634.265
RLTA1_RS34305	489.019	0.670841	0.174204	3.85088	0.000117694	0.00200923	607	529	561	454	431	315	668.894	551.372	581.911	449.282	357.787	324.868
RLTA1_RS20185	891.421	-0.734478	0.190879	-3.84788	0.000119144	0.00202859	631	569	694	864	1575	1142	695.342	593.064	719.869	855.021	1307.46	1177.77
RLTA1_RS01285	621.568	0.502342	0.130705	3.84334	0.00012137	0.00205723	641	724	699	566	608	464	706.361	754.619	725.055	560.118	504.721	478.535
RLTA1_RS10370	947.546	0.498949	0.129828	3.84315	0.000121465	0.00205723	989	1163	990	779	911	804	1089.85	1212.19	1026.9	770.904	756.251	829.186
RLTA1_RS03530	907.019	0.620819	0.161573	3.84235	0.000121861	0.00205852	835	1126	1161	724	942	626	920.143	1173.62	1204.28	716.476	781.985	645.61
RLTA1_RS27425	407.184	-0.515982	0.134327	-3.84124	0.000122416	0.00206248	316	334	298	490	570	465	348.222	348.125	309.108	484.908	473.176	479.566
RLTA1_RS19405	3330.22	-0.391982	0.102212	-3.83499	0.000125568	0.00211007	2542	2769	2848	3951	4479	3599	2801.2	2886.11	2954.16	3909.94	3718.17	3711.74
RLTA1_RS28570	1373.78	0.501536	0.130858	3.83268	0.000126756	0.00212448	1481	1681	1395	1140	1440	1055	1632.01	1752.09	1447	1128.15	1195.39	1088.05
RLTA1_RS02285	553.124	-0.552014	0.144078	-3.83135	0.000127444	0.00213046	437	414	417	612	764	711	481.56	431.509	432.544	605.64	634.222	733.273
RLTA1_RS08830	544.202	-0.515212	0.134708	-3.82467	0.000130947	0.00218335	403	445	420	662	702	663	444.093	463.82	435.655	655.12	582.753	683.769
RLTA1_RS00575	989.637	0.647458	0.169462	3.82068	0.000133084	0.00219623	1194	1160	1061	733	1113	643	1315.75	1209.06	1100.55	725.382	923.938	663.142
RLTA1_RS01530	482.621	-0.829878	0.217202	-3.82076	0.000133043	0.00219623	388	320	272	511	913	571	427.564	333.533	282.139	505.689	757.911	588.887
RLTA1_RS11905	11550.5	0.405325	0.106053	3.8219	0.000132428	0.00219623	11578	12168	13541	10092	11705	9805	12758.6	12682.6	14045.7	9987.12	9716.71	10112.1
RLTA1_RS28780	177.576	-0.682184	0.178465	-3.82251	0.000132101	0.00219623	115	136	135	226	230	235	126.726	141.752	140.032	223.651	190.931	242.362
RLTA1_RS15540	487.635	0.594138	0.155684	3.8163	0.000135467	0.00222983	499	594	569	360	432	438	549.882	619.121	590.209	356.259	358.617	451.721
RLTA1_RS18460	373.166	0.593068	0.155728	3.80837	0.000139887	0.00228506	370	474	429	315	380	257	407.728	494.046	444.991	311.726	315.451	265.051
RLTA1_RS27355	390.138	0.679887	0.178501	3.80888	0.000139598	0.00228506	374	522	467	272	339	339	412.136	544.076	484.407	269.173	281.415	349.619
RLTA1_RS30120	1360.9	0.529707	0.139067	3.80901	0.000139525	0.00228506	1432	1525	1597	1272	1331	948	1578.02	1589.5	1656.53	1258.78	1104.91	977.697
RLTA1_RS11030	1516.69	0.633095	0.166365	3.80546	0.000141541	0.00230623	1703	1698	1819	1374	1522	915	1876.65	1769.81	1886.8	1359.72	1263.46	943.663
RLTA1_RS09355	760.541	0.447232	0.117593	3.80322	0.000142827	0.00231846	788	848	849	619	811	625	868.351	883.863	880.646	612.567	673.238	644.579
RLTA1_RS19385	2796.25	0.572293	0.150504	3.80251	0.000143237	0.00231846	3305	2838	3308	2558	2672	1936	3642	2958.02	3431.31	2531.42	2218.12	1996.65
RLTA1_RS30765	237.341	0.889391	0.23391	3.80228	0.000143373	0.00231846	353	228	287	189	158	176	388.995	237.643	297.698	187.036	131.161	181.513
RLTA1_RS18205	422.992	0.582834	0.153353	3.80061	0.000144339	0.00232823	502	504	428	348	432	303	553.188	525.315	443.954	344.383	358.617	312.492
RLTA1_RS22515	2793.48	-0.740427	0.194986	-3.79733	0.000146265	0.00235341	2064	1649	2201	4130	4402	2660	2274.46	1718.74	2283.04	4087.08	3654.25	2743.33
RLTA1_RS32085	2004.7	0.910446	0.239852	3.79587	0.000147126	0.00236135	2639	2337	2418	1611	2048	855	2908.09	2435.84	2508.13	1594.26	1700.11	881.783
RLTA1_RS01770	964.321	-0.53846	0.141925	-3.79397	0.000148257	0.0023677	672	696	861	1083	1381	1172	740.522	725.435	893.094	1071.74	1146.41	1208.71
RLTA1_RS08445	302.971	-0.566552	0.149311	-3.79444	0.000147979	0.0023677	211	240	241	331	448	374	232.515	250.15	249.983	327.56	371.9	385.716
RLTA1_RS27560	4200.3	-0.980009	0.258365	-3.79312	0.000148766	0.00236994	2575	2358	3069	6851	7944	3247	2837.57	2457.72	3183.4	6779.8	6594.58	3348.71
RLTA1_RS22730	9656.06	-0.946033	0.249561	-3.7908	0.000150165	0.00238283	7307	4747	6553	15491	17001	8432	8052.08	4947.76	6797.26	15330	14113.1	8696.14
RLTA1_RS32190	1629.28	0.46943	0.123842	3.79055	0.000150315	0.00238283	1603	1986	1773	1392	1574	1373	1766.45	2069.99	1839.09	1377.53	1306.63	1416.01
RLTA1_RS28910	1138.54	-0.737342	0.195311	-3.77521	0.000159873	0.00252811	838	711	865	1648	1884	1042	923.449	741.069	897.243	1630.87	1563.97	1074.64
RLTA1_RS34050	4690.21	-1.14071	0.303212	-3.76209	0.000168502	0.00265804	3330	2269	2648	7293	10416	3390	3669.55	2364.96	2746.7	7217.21	8646.67	3496.19
RLTA1_RS30125	1489.65	0.603149	0.160607	3.75543	0.000173045	0.00272303	1458	1706	1933	1351	1446	980	1606.67	1778.15	2005.05	1336.96	1200.37	1010.7
RLTA1_RS21465	3818.73	0.454342	0.121352	3.744	0.000181111	0.00284301	3899	4411	4195	3541	3883	2850	4296.57	4597.55	4351.37	3504.2	3223.41	2939.28
RLTA1_RS17440	455.908	0.541757	0.145384	3.72639	0.000194242	0.0030417	474	503	555	349	500	342	522.333	524.273	575.688	345.373	415.067	352.713
RLTA1_RS07785	8695.76	-0.484417	0.130201	-3.72053	0.000198803	0.00310558	7313	6270	6898	9937	12972	9525	8058.69	6535.17	7155.12	9833.73	10768.5	9823.38
RLTA1_RS10125	227.285	0.919208	0.247157	3.71912	0.000199917	0.00311542	230	379	235	184	202	118	253.453	395.029	243.76	182.088	167.687	121.696
RLTA1_RS01005	817.633	-0.563923	0.151741	-3.71636	0.000202114	0.00314205	659	549	657	1060	1200	854	726.197	572.218	681.49	1048.98	996.16	880.752
RLTA1_RS35855	490.722	-0.577997	0.155577	-3.71518	0.000203059	0.00314913	412	338	362	582	761	538	454.011	352.295	375.494	575.952	631.731	554.853
RLTA1_RS20270	427.289	-0.518415	0.139778	-3.70886	0.000208198	0.00322106	328	305	361	509	581	508	361.445	317.899	374.456	503.71	482.307	523.913
RLTA1_RS07100	14634.9	-0.608298	0.164231	-3.70392	0.00021229	0.00327649	12090	9274	11371	15708	22635	18123	13322.8	9666.21	11794.9	15544.8	18790.1	18690.7
RLTA1_RS18375	226.235	0.642972	0.173805	3.69939	0.000216119	0.0033251	231	301	250	158	225	181	254.555	313.73	259.319	156.358	186.78	186.67
RLTA1_RS21400	2842.78	-0.690858	0.18677	-3.69897	0.000216473	0.0033251	2116	1784	2250	3871	4781	2649	2331.76	1859.45	2333.87	3830.77	3968.87	2731.98
RLTA1_RS31325	724.21	0.480258	0.129983	3.69477	0.000220089	0.00336894	711	855	825	587	705	629	783.499	891.16	855.752	580.9	585.244	648.704
RLTA1_RS35170	604.79	0.51646	0.139794	3.69444	0.000220374	0.00336894	685	699	629	548	591	446	754.848	728.562	652.446	542.305	490.609	459.971
RLTA1_RS24455	1623.13	-0.802643	0.21746	-3.69099	0.000223382	0.00340684	1092	1171	1085	2225	3099	1372	1203.35	1220.52	1125.44	2201.88	2572.58	1414.98
RLTA1_RS24065	8774.61	0.405729	0.109953	3.69002	0.000224238	0.0034118	9737	9456	9077	7780	8866	7357	10729.9	9855.91	9415.34	7699.15	7359.96	7587.46
RLTA1_RS27900	2537.19	0.404186	0.109575	3.68865	0.000225445	0.00342208	2578	2942	2664	2267	2567	2112	2840.87	3066.42	2763.3	2243.44	2130.95	2178.16
RLTA1_RS01900	1821.75	-0.497694	0.135097	-3.68399	0.000229613	0.00346899	1343	1369	1567	1944	2832	2059	1479.94	1426.9	1625.41	1923.8	2350.94	2123.5
RLTA1_RS24935	212.704	-0.771081	0.209291	-3.68425	0.000229381	0.00346899	126	136	184	318	322	216	138.848	141.752	190.859	314.695	267.303	222.766
RLTA1_RS23260	2542.85	0.50981	0.138432	3.68274	0.000230738	0.00347782	3064	2764	2608	2277	2412	1977	3376.43	2880.89	2705.21	2253.34	2002.28	2038.93
RLTA1_RS27960	1935.72	0.756072	0.205362	3.68166	0.000231721	0.00348448	2230	2199	2455	1578	2096	986	2457.39	2292	2546.51	1561.6	1739.96	1016.89
RLTA1_RS29160	306.4	0.666817	0.181371	3.67654	0.000236415	0.00354677	314	396	355	232	240	274	346.018	412.748	368.233	229.589	199.232	282.583
RLTA1_RS05905	2182.06	0.453914	0.123561	3.67361	0.000239147	0.00357943	2385	2293	2458	2020	2207	1642	2628.19	2389.98	2549.62	1999.01	1832.1	1693.44
RLTA1_RS10270	1928.53	0.375381	0.102236	3.67171	0.000240934	0.0035978	1952	2130	2085	1679	2003	1661	2151.04	2220.08	2162.72	1661.55	1662.76	1713.03
RLTA1_RS26960	2236.83	0.378664	0.103172	3.67022	0.00024234	0.00361042	2246	2466	2449	2003	2265	1913	2475.02	2570.29	2540.29	1982.18	1880.25	1972.93
RLTA1_RS21455	611.907	-0.724858	0.197711	-3.66625	0.000246135	0.00365849	459	402	443	938	935	565	505.803	419.001	459.513	928.252	776.174	582.699
RLTA1_RS17720	836.667	0.677879	0.185405	3.65621	0.000255968	0.00379588	995	1064	851	694	614	713	1096.46	1109	882.721	686.788	509.702	735.335
RLTA1_RS09610	265.96	0.831487	0.22766	3.65233	0.000259874	0.00383612	235	435	298	209	224	176	258.962	453.397	309.108	206.828	185.95	181.513
RLTA1_RS23395	12837.9	-0.395364	0.108239	-3.65269	0.000259509	0.00383612	9823	10237	11351	15251	16791	14280	10824.6	10669.9	11774.1	15092.5	13938.8	14727.3
RLTA1_RS22635	10023.7	0.567814	0.155493	3.65171	0.000260501	0.00383658	9914	11586	12449	9011	10356	6510	10924.9	12076	12913	8917.35	8596.86	6713.93
RLTA1_RS06500	1069.91	-0.709939	0.19448	-3.65044	0.000261787	0.00384671	862	635	794	1253	1380	1550	949.896	661.855	823.596	1239.98	1145.58	1598.55
RLTA1_RS23120	1046.11	0.648074	0.177802	3.64492	0.000267472	0.0039213	1340	1084	1182	703	1157	764	1476.64	1129.84	1226.06	695.694	960.464	787.933
RLTA1_RS08435	1115.1	-0.470798	0.129265	-3.64211	0.000270408	0.00395533	917	859	866	1258	1490	1362	1010.5	895.329	898.28	1244.93	1236.9	1404.67
RLTA1_RS17250	9328.08	-0.641899	0.176712	-3.63246	0.000280736	0.0040786	6870	5956	7791	12833	14708	8920	7570.52	6207.89	8081.41	12699.6	12209.6	9199.43
RLTA1_RS24460	734.773	-0.571802	0.157393	-3.63295	0.000280204	0.0040786	534	513	626	934	908	929	588.451	534.696	649.334	924.293	753.761	958.102
RLTA1_RS31170	1681.58	-0.795685	0.219014	-3.63304	0.000280104	0.0040786	1090	1083	1309	2878	2344	1559	1201.14	1128.8	1357.79	2848.09	1945.83	1607.84
RLTA1_RS20425	3339.03	0.595533	0.164073	3.62968	0.000283776	0.00411348	4094	3516	3740	3186	2921	2328	4511.46	3664.7	3879.41	3152.89	2424.82	2400.93
RLTA1_RS25105	1023.85	0.652445	0.179811	3.6285	0.000285076	0.00412303	1156	1276	1109	1003	846	673	1273.87	1329.96	1150.34	992.576	702.293	694.082
RLTA1_RS04165	493.963	-0.934634	0.257656	-3.62745	0.000286231	0.00413046	331	309	319	475	645	912	364.751	322.068	330.891	470.064	535.436	940.569
RLTA1_RS25340	6076.4	0.757091	0.208794	3.62602	0.000287823	0.00414414	6426	6493	8732	4685	6654	3289	7081.25	6767.6	9057.49	4636.31	5523.71	3392.03
RLTA1_RS15765	1575.16	-0.478952	0.132121	-3.62511	0.000288841	0.00414951	1248	1168	1307	2034	2180	1629	1375.26	1217.4	1355.72	2012.86	1809.69	1680.03
RLTA1_RS16580	1941.77	0.534708	0.147754	3.6189	0.000295858	0.00424085	1808	2389	2323	1504	1820	1706	1992.36	2490.04	2409.59	1488.37	1510.84	1759.44
RLTA1_RS17230	853.713	0.422727	0.117058	3.61127	0.0003047	0.00434822	903	892	973	720	908	700	995.077	929.724	1009.27	712.517	753.761	721.928
RLTA1_RS28400	492.846	0.535422	0.148242	3.6118	0.000304081	0.00434822	580	520	549	414	525	350	639.141	541.992	569.464	409.697	435.82	360.964
RLTA1_RS32155	31471	0.732668	0.203097	3.60749	0.000309177	0.00440236	33576	39245	38544	26694	33556	16162	36999.7	40904.7	39980.7	26416.6	27855.9	16668.3
RLTA1_RS08690	275.91	-0.658474	0.182611	-3.60588	0.000311099	0.0044102	172	220	215	283	419	374	189.538	229.304	223.014	280.059	347.826	385.716
RLTA1_RS33885	3591.46	0.619887	0.171902	3.60605	0.000310899	0.0044102	3528	5027	3786	2507	3759	2805	3887.74	5239.6	3927.12	2480.95	3120.47	2892.87
RLTA1_RS02010	274.391	-0.702884	0.195112	-3.60246	0.000315215	0.00445873	187	179	226	300	500	298	206.068	186.57	234.424	296.882	415.067	307.335
RLTA1_RS31490	1629.26	-0.421495	0.117043	-3.6012	0.000316753	0.00447067	1244	1325	1376	1744	2389	1830	1370.85	1381.04	1427.29	1725.88	1983.19	1887.33
RLTA1_RS23175	1129.87	0.585582	0.162692	3.59934	0.000319031	0.00449296	1288	1261	1287	733	1195	963	1419.33	1314.33	1334.97	725.382	992.009	993.167
RLTA1_RS04170	1821.48	0.520407	0.144709	3.59623	0.000322866	0.00453705	1859	2206	2017	1631	1925	1238	2048.56	2299.3	2092.18	1614.05	1598.01	1276.78
RLTA1_RS34890	371.358	0.644234	0.179196	3.59513	0.000324228	0.00454626	377	383	524	311	312	294	415.442	399.198	543.532	307.768	259.002	303.21
RLTA1_RS01825	957.828	-0.575582	0.16013	-3.59446	0.000325061	0.00454803	727	648	802	1143	1572	972	801.131	675.405	831.895	1131.12	1304.97	1002.45
RLTA1_RS00980	1687.4	0.418707	0.116523	3.59335	0.000326448	0.00455752	1679	1877	1913	1539	1619	1422	1850.2	1956.38	1984.31	1523.01	1343.99	1466.55
RLTA1_RS07790	11768.3	-0.3797	0.105754	-3.5904	0.000330168	0.00459948	9708	9204	10021	13380	15722	13218	10697.9	9593.25	10394.5	13240.9	13051.4	13632.1
RLTA1_RS20110	3541.39	-0.627524	0.175033	-3.58518	0.000336843	0.00468234	2823	2165	2875	4941	5096	3664	3110.86	2256.56	2982.17	4889.65	4230.36	3778.78
RLTA1_RS26390	776.653	0.481285	0.134329	3.58289	0.000339819	0.00471352	910	821	826	689	777	599	1002.79	855.722	856.789	681.84	645.013	617.764
RLTA1_RS30280	202.18	-0.56333	0.157267	-3.58201	0.000340966	0.00471926	151	149	162	254	294	221	166.397	155.301	168.039	251.36	244.059	227.923
RLTA1_RS22020	377.36	0.532852	0.14888	3.57907	0.000344825	0.00476244	436	402	423	327	333	316	480.458	419.001	438.767	323.602	276.434	325.899
RLTA1_RS13935	2290.12	0.415486	0.116204	3.57548	0.000349587	0.00481786	2465	2369	2571	2086	2215	1925	2716.35	2469.19	2666.83	2064.32	1838.74	1985.3
RLTA1_RS22330	497.528	-0.58603	0.16403	-3.5727	0.000353319	0.00485889	322	398	409	540	832	549	354.834	414.832	424.245	534.388	690.671	566.198
RLTA1_RS07725	2567.25	-0.604861	0.169333	-3.57202	0.000354243	0.00486121	2146	1588	2016	2926	4129	2879	2364.82	1655.16	2091.15	2895.59	3427.62	2969.19
RLTA1_RS01880	311.966	-0.625967	0.175359	-3.56962	0.000357496	0.00488985	182	245	270	369	496	348	200.558	255.362	280.064	365.165	411.746	358.901
RLTA1_RS09670	464.007	-0.780078	0.218548	-3.56936	0.000357849	0.00488985	370	272	322	631	836	427	407.728	283.503	334.003	624.442	693.991	440.376
RLTA1_RS15770	4236.66	-0.419203	0.117815	-3.55814	0.000373489	0.00508198	3381	3255	3623	4539	5975	4937	3725.75	3392.66	3758.05	4491.83	4960.04	5091.66
RLTA1_RS29535	1421.62	0.387981	0.109026	3.55862	0.000372807	0.00508198	1448	1522	1593	1231	1436	1246	1595.65	1586.37	1652.38	1218.21	1192.07	1285.03
RLTA1_RS10045	1944.82	1.01266	0.284697	3.55698	0.000375147	0.00509377	2856	1870	2609	1622	1812	734	3147.22	1949.09	2706.25	1605.14	1504.2	756.993
RLTA1_RS06370	3542.56	-0.72298	0.203396	-3.55454	0.000378645	0.00513044	2820	2081	2644	3604	5121	5254	3107.55	2169.01	2742.56	3566.55	4251.11	5418.59
RLTA1_RS08720	629.906	0.427279	0.120237	3.55363	0.000379957	0.00513069	631	709	707	526	666	522	695.342	738.985	733.353	520.534	552.869	538.352
RLTA1_RS23930	872.179	0.488458	0.137461	3.55342	0.000380258	0.00513069	834	963	1092	742	910	667	919.041	1003.73	1132.7	734.289	755.421	687.894
RLTA1_RS17435	3990.07	0.483789	0.136309	3.5492	0.000386409	0.00520278	3973	4280	4935	3736	3715	3104	4378.12	4461.01	5118.95	3697.17	3083.94	3201.24
RLTA1_RS23970	543.609	-0.60334	0.170056	-3.54789	0.000388329	0.00521772	355	407	462	550	838	705	391.199	424.213	479.221	544.284	695.651	727.085
RLTA1_RS22610	24724.4	-0.84907	0.239503	-3.54513	0.00039242	0.0052617	19035	12161	18611	36230	43753	22511	20976	12675.3	19304.7	35853.5	36320.8	23216.2
RLTA1_RS01535	695.554	-0.737652	0.208357	-3.54032	0.000399642	0.00531165	576	497	397	762	967	1020	634.733	518.019	411.798	754.081	802.739	1051.95
RLTA1_RS01755	4261.3	-0.465443	0.131485	-3.5399	0.000400272	0.00531165	3252	3151	3733	4938	6494	4412	3583.6	3284.26	3872.15	4886.68	5390.88	4550.21
RLTA1_RS19550	12431.4	-0.654901	0.185003	-3.53994	0.000400211	0.00531165	9687	7746	9856	18602	15431	13961	10674.8	8073.59	10223.4	18408.7	12809.8	14398.3
RLTA1_RS29640	9603.43	0.432353	0.122109	3.54072	0.000399031	0.00531165	10609	9635	10954	8723	9904	7438	11690.8	10042.5	11362.3	8632.35	8221.64	7671
RLTA1_RS29855	514.312	0.709098	0.200224	3.54152	0.000397825	0.00531165	698	574	527	384	391	453	769.174	598.276	546.644	380.009	324.582	467.191
RLTA1_RS30285	2758.99	0.486044	0.137394	3.53758	0.000403805	0.00534751	2751	3528	2843	2392	2627	2277	3031.51	3677.21	2948.97	2367.14	2180.76	2348.33
RLTA1_RS02915	4577.76	0.414581	0.117416	3.53088	0.00041418	0.00546243	4403	5274	5152	4172	4764	3578	4851.96	5497.05	5344.04	4128.64	3954.75	3690.08
RLTA1_RS17450	2008.46	0.649614	0.183971	3.53106	0.000413896	0.00546243	2445	2111	2376	1975	1630	1342	2694.31	2200.28	2464.57	1954.47	1353.12	1384.04
RLTA1_RS17605	652.624	0.531916	0.150688	3.52991	0.000415709	0.00547137	603	829	758	509	672	523	664.487	864.06	786.254	503.71	557.849	539.383
RLTA1_RS01945	332.198	-0.596469	0.169249	-3.52421	0.000424745	0.00556922	228	249	273	355	563	369	251.249	259.531	283.176	351.311	467.365	380.559
RLTA1_RS10280	1769.83	0.557499	0.158195	3.52413	0.000424874	0.00556922	1554	2188	2246	1385	1790	1396	1712.46	2280.53	2329.72	1370.61	1485.94	1439.73
RLTA1_RS17015	872.177	-1.22915	0.348928	-3.52265	0.000427254	0.00558904	544	422	507	1248	2261	539	599.47	439.847	525.898	1235.03	1876.93	555.885
RLTA1_RS19720	3035.02	-0.752395	0.213784	-3.51941	0.000432505	0.00564625	2543	1708	2122	4517	4741	2929	2802.3	1780.23	2201.1	4470.06	3935.66	3020.75
RLTA1_RS06720	478.055	-0.578015	0.164334	-3.51731	0.000435947	0.00566819	364	332	389	493	700	629	401.116	346.041	403.5	487.876	581.093	648.704
RLTA1_RS23900	2489.32	-0.74703	0.212361	-3.51774	0.000435232	0.00566819	2036	1317	1890	3742	3546	2630	2243.61	1372.7	1960.45	3703.11	2943.65	2712.39
RLTA1_RS04810	1961.67	0.528149	0.150483	3.50968	0.000448641	0.00581889	2078	2260	2222	1909	1858	1346	2289.89	2355.58	2304.82	1889.16	1542.39	1388.16
RLTA1_RS06095	2614.48	0.510599	0.1455	3.50927	0.000449346	0.00581889	2585	2969	3157	2268	2864	1791	2848.59	3094.56	3274.68	2244.43	2377.5	1847.1
RLTA1_RS21590	4847.46	-0.722634	0.205954	-3.50871	0.000450282	0.00581931	3992	2746	3580	7446	6355	5300	4399.06	2862.13	3713.44	7368.62	5275.5	5466.03
RLTA1_RS26675	2985.89	0.468258	0.133551	3.50621	0.000454532	0.00586247	3440	3147	3208	2791	2786	2368	3790.77	3280.09	3327.58	2761.99	2312.75	2442.18
RLTA1_RS00005	9169.89	0.427531	0.121967	3.5053	0.0004561	0.00587091	9355	10132	10302	7461	8868	8454	10308.9	10560.5	10686	7383.46	7361.62	8718.83
RLTA1_RS03510	2089.05	-0.49057	0.140024	-3.50346	0.000459251	0.00589967	1542	1577	1801	2407	2639	2667	1699.23	1643.69	1868.13	2381.99	2190.72	2750.55
RLTA1_RS07735	14624.7	-0.475705	0.136161	-3.49369	0.000476388	0.00610763	12098	10167	12318	16160	21040	17050	13331.6	10597	12777.2	15992.1	17466	17584.1
RLTA1_RS06530	2451.29	0.462082	0.132299	3.49271	0.000478147	0.006118	2541	2441	3063	2168	2450	1946	2800.1	2544.23	3177.17	2145.47	2033.83	2006.96
RLTA1_RS18390	2762.5	0.509016	0.145807	3.49103	0.000481153	0.00614425	2844	3148	3201	2404	3065	1858	3134	3281.13	3320.32	2379.02	2544.36	1916.2
RLTA1_RS30180	846.882	-0.708408	0.202992	-3.48984	0.000483308	0.00615955	651	556	610	1226	1407	747	717.381	579.514	632.738	1213.26	1168	770.4
RLTA1_RS14575	815.93	0.423302	0.121369	3.48772	0.000487166	0.00619644	881	923	840	725	814	677	970.834	962.035	871.311	717.465	675.728	698.208
RLTA1_RS02365	652.41	-0.479969	0.137719	-3.48514	0.000491882	0.00623179	502	497	543	699	902	814	553.188	518.019	563.24	691.736	748.78	839.499
RLTA1_RS18885	33444.8	0.644481	0.184898	3.4856	0.000491032	0.00623179	42335	34588	38252	29230	34951	19730	46651.8	36050.8	39677.8	28926.2	29014	20348.1
RLTA1_RS00060	2753.24	-0.446732	0.128311	-3.48162	0.000498392	0.00628951	2045	2230	2327	3301	4147	2733	2253.52	2324.31	2413.74	3266.69	3442.56	2818.61
RLTA1_RS13340	314.963	0.561721	0.161326	3.48189	0.000497884	0.00628951	312	389	363	247	278	280	343.814	405.452	376.531	244.433	230.777	288.771
RLTA1_RS23125	2630.15	0.512911	0.147467	3.47813	0.000504924	0.00635948	3173	2825	2736	1936	2785	2205	3496.54	2944.47	2837.98	1915.88	2311.92	2274.07
RLTA1_RS06520	738.153	0.594991	0.171269	3.47401	0.000512742	0.00643277	728	1021	769	596	639	625	802.233	1064.18	797.664	589.806	530.455	644.579
RLTA1_RS24100	1852.95	-0.492192	0.141657	-3.47453	0.000511755	0.00643277	1372	1411	1578	1943	2550	2384	1511.9	1470.67	1636.82	1922.81	2116.84	2458.68
RLTA1_RS05355	3032.2	0.464828	0.134088	3.4666	0.000527085	0.00659281	2810	3677	3490	2436	3058	2613	3096.53	3832.51	3620.09	2410.68	2538.55	2694.85
RLTA1_RS09325	398.56	0.547996	0.158098	3.46618	0.000527908	0.00659281	370	514	459	335	370	323	407.728	535.738	476.109	331.519	307.149	333.118
RLTA1_RS12170	320.846	0.589955	0.17022	3.46584	0.000528572	0.00659281	371	333	386	228	294	290	408.83	347.083	400.388	225.631	244.059	299.084
RLTA1_RS17235	534.564	0.427851	0.123709	3.45854	0.000543119	0.00674924	563	597	576	442	571	442	620.408	622.248	597.47	437.407	474.006	455.846
RLTA1_RS33750	576.713	-0.413691	0.119616	-3.45849	0.000543211	0.00674924	449	467	484	676	774	645	494.784	486.75	502.041	668.975	642.523	665.205
RLTA1_RS25930	1725.94	-0.865304	0.250328	-3.45667	0.000546886	0.0067818	1351	884	1215	2653	3063	1471	1488.76	921.386	1260.29	2625.43	2542.7	1517.08
RLTA1_RS19155	10823	0.429183	0.124286	3.45318	0.000554026	0.00685713	11681	11598	11860	10287	10047	8877	12872.1	12088.5	12302.1	10180.1	8340.35	9155.08
RLTA1_RS26215	1097.28	0.463825	0.134362	3.45204	0.00055636	0.00687281	1025	1323	1261	968	1126	848	1129.52	1378.95	1308	957.94	934.73	874.564
RLTA1_RS19165	4843.47	-0.68391	0.198165	-3.45121	0.000558083	0.00688089	3770	2899	3831	6988	7650	4504	4154.42	3021.6	3973.8	6915.38	6350.52	4645.09
RLTA1_RS34790	860.14	0.474688	0.13759	3.45003	0.000560533	0.00689788	870	991	973	646	869	775	958.712	1032.91	1009.27	639.286	721.386	799.277
RLTA1_RS23950	468.457	-0.566482	0.16424	-3.44911	0.000562442	0.00690816	316	361	394	477	754	562	348.222	376.267	408.686	472.043	625.92	579.605
RLTA1_RS07620	18346.1	-0.459419	0.133399	-3.44396	0.000573262	0.00702443	14818	12954	15924	20157	25800	21684	16329	13501.8	16517.6	19947.5	21417.4	22363.3
RLTA1_RS22105	3637.9	0.417523	0.121247	3.44357	0.000574091	0.00702443	3664	3917	4204	3248	3399	3210	4037.61	4082.66	4360.7	3214.25	2821.62	3310.56
RLTA1_RS21415	4905.53	-0.747724	0.217275	-3.44137	0.000578779	0.00706836	3749	2855	3740	7462	7944	4332	4131.28	2975.74	3879.41	7384.45	6594.58	4467.7
RLTA1_RS11060	475.664	-0.590195	0.171627	-3.43881	0.000584274	0.00712195	362	356	356	688	669	464	398.912	371.056	369.27	680.85	555.359	478.535
RLTA1_RS14570	393.536	0.530504	0.154475	3.43423	0.00059423	0.00722961	365	495	460	331	400	297	402.218	515.934	477.146	327.56	332.053	306.304
RLTA1_RS24450	1189.02	-0.677697	0.197663	-3.42855	0.000606806	0.00736868	937	785	862	1693	1951	1061	1032.54	818.199	894.131	1675.41	1619.59	1094.24
RLTA1_RS13950	1787.6	0.372517	0.108669	3.42799	0.000608062	0.00737003	1810	1979	1922	1526	1833	1593	1994.56	2062.7	1993.64	1510.14	1521.63	1642.9
RLTA1_RS13875	1185.47	0.518835	0.151442	3.42597	0.000612607	0.00741117	1432	1139	1373	1042	1175	889	1578.02	1187.17	1424.18	1031.17	975.406	916.849
RLTA1_RS17035	548.941	0.698417	0.203919	3.42498	0.000614854	0.0074244	471	812	648	474	476	380	519.027	846.341	672.154	469.074	395.143	391.904
RLTA1_RS20295	643.558	-0.511531	0.149417	-3.42351	0.000618175	0.00745052	493	438	571	719	941	753	543.27	456.524	592.284	711.528	781.155	776.588
RLTA1_RS10025	4455.82	0.981463	0.286756	3.42265	0.000620148	0.00746032	6141	4270	6295	3657	4401	1663	6767.18	4450.59	6529.65	3618.99	3653.42	1715.09
RLTA1_RS00870	438.775	0.512499	0.149776	3.42176	0.000622163	0.0074706	525	495	437	360	428	362	578.533	515.934	453.289	356.259	355.297	373.34
RLTA1_RS02085	2557.29	0.339914	0.0995505	3.41449	0.000639012	0.00765863	2534	2765	2793	2274	2724	2192	2792.39	2881.94	2897.11	2250.37	2261.28	2260.67
RLTA1_RS22335	3844.68	-0.436745	0.127979	-3.41264	0.00064337	0.00769653	3130	2806	3305	4329	5699	4122	3449.16	2924.67	3428.19	4284.01	4730.93	4251.12
RLTA1_RS14940	2429.73	-0.760484	0.22306	-3.40932	0.000651239	0.00777621	1975	1433	1679	3926	3572	2246	2176.39	1493.6	1741.58	3885.2	2965.24	2316.36
RLTA1_RS10925	927.002	0.490473	0.144065	3.40453	0.000662782	0.0078269	931	1126	1011	799	816	820	1025.93	1173.62	1048.68	790.696	677.389	845.687
RLTA1_RS15910	1157.77	-0.469967	0.137965	-3.40642	0.000658211	0.0078269	993	830	919	1388	1550	1332	1094.25	865.102	953.256	1373.58	1286.71	1373.73
RLTA1_RS18550	507.324	-0.711182	0.208861	-3.40505	0.000661512	0.0078269	329	351	411	683	910	444	362.547	365.844	426.32	675.902	755.421	457.909
RLTA1_RS19900	29578.8	-0.636991	0.187041	-3.40563	0.000660121	0.0078269	24792	17952	22586	41184	44737	29205	27320	18711.2	23427.9	40756	37137.7	30119.9
RLTA1_RS20320	2053.42	0.351953	0.103324	3.40632	0.000658451	0.0078269	2099	2192	2227	1891	2123	1725	2313.03	2284.7	2310.01	1871.35	1762.37	1779.04
RLTA1_RS31625	1848.89	0.370724	0.108881	3.40486	0.000661977	0.0078269	1794	2022	2093	1649	1965	1527	1976.93	2107.51	2171.02	1631.86	1631.21	1574.83
RLTA1_RS12195	78090.5	1.06595	0.313371	3.40155	0.000670051	0.00789825	85258	120432	94100	77365	57630	26235	93951.6	125525	97607.6	76561	47840.6	27056.8
RLTA1_RS01385	486.521	-0.541326	0.15918	-3.40071	0.000672122	0.00790819	345	358	420	654	702	485	380.179	373.14	435.655	647.203	582.753	500.193
RLTA1_RS18030	786.37	-0.7066	0.20792	-3.39842	0.000677756	0.00795992	567	469	655	756	1400	984	624.816	488.835	679.415	748.143	1162.19	1014.82
RLTA1_RS30875	150.052	-0.762444	0.224414	-3.39749	0.000680063	0.00797247	101	135	79	173	235	194	111.299	140.709	81.9447	171.202	195.081	200.077
RLTA1_RS01885	638.991	-0.606268	0.17856	-3.39531	0.000685507	0.00802168	368	485	587	746	1000	723	405.524	505.512	608.88	738.247	830.133	745.648
RLTA1_RS21810	2548.21	0.596861	0.176052	3.39025	0.000698284	0.00815637	2303	2995	3416	2114	2086	2194	2537.83	3121.66	3543.33	2092.03	1731.66	2262.73
RLTA1_RS26140	21250.2	0.415279	0.122624	3.38659	0.000707676	0.00825109	23365	22583	22730	20250	20406	17123	25747.5	23538.1	23577.3	20039.6	16939.7	17659.4
RLTA1_RS36140	4903.7	0.883462	0.260922	3.38592	0.000709402	0.00825626	7728	4299	5865	2640	5247	3271	8516.01	4480.81	6083.62	2612.56	4355.71	3373.47
RLTA1_RS00130	1260.12	-0.510361	0.150948	-3.38103	0.000722147	0.00838942	1012	862	1065	1419	1672	1600	1115.19	898.456	1104.7	1404.25	1387.98	1650.12
RLTA1_RS11320	750.863	0.569344	0.168598	3.37694	0.000732966	0.00849977	752	930	862	645	825	475	828.68	969.331	894.131	638.297	684.86	489.88
RLTA1_RS33900	543.35	0.567701	0.168172	3.37571	0.000736243	0.0085224	554	644	640	482	425	470	610.49	671.236	663.856	476.991	352.807	484.723
RLTA1_RS18090	1462.16	-0.488393	0.144886	-3.37087	0.00074931	0.00864928	1187	1052	1202	1907	2070	1470	1308.04	1096.49	1246.8	1887.18	1718.38	1516.05
RLTA1_RS32665	5349.19	-0.745922	0.221299	-3.37066	0.000749891	0.00864928	4414	3204	3650	7568	9345	4711	4864.09	3339.5	3786.05	7489.35	7757.59	4858.58
RLTA1_RS32410	318.955	0.497061	0.147504	3.36982	0.00075218	0.00866016	305	379	375	274	325	245	336.1	395.029	388.978	271.152	269.793	252.675
RLTA1_RS02920	101091	0.504063	0.149629	3.36874	0.000755127	0.00867856	116366	103059	115757	97272	89161	78103	128232	107418	120072	96261.1	74015.5	80549.6
RLTA1_RS33560	104.022	-0.908831	0.269943	-3.36675	0.000760587	0.00872574	67	79	59	106	222	114	73.8318	82.3411	61.1992	104.898	184.29	117.571
RLTA1_RS18650	1181.01	0.781198	0.232297	3.36293	0.000771208	0.00883184	1366	1295	1566	1206	942	612	1505.29	1349.77	1624.37	1193.47	781.985	631.171
RLTA1_RS01175	3008.45	-0.708123	0.210744	-3.36012	0.000779092	0.0088977	2423	1878	2147	3992	5410	2671	2670.07	1957.42	2227.03	3950.51	4491.02	2754.67
RLTA1_RS21915	7249.64	0.401527	0.119506	3.35989	0.000779724	0.0088977	6711	8208	8489	6303	7573	6029	7395.31	8555.13	8805.43	6237.5	6286.6	6217.86
RLTA1_RS03790	563.652	0.532586	0.15879	3.35403	0.000796447	0.00907245	545	748	597	433	564	471	600.572	779.634	619.253	428.5	468.195	485.754
RLTA1_RS00040	10253	-0.595831	0.177718	-3.35269	0.000800313	0.00908433	8142	6656	8278	14955	14079	10215	8972.22	6937.49	8586.56	14799.6	11687.4	10535
RLTA1_RS24620	1510.72	0.382305	0.114015	3.3531	0.000799106	0.00908433	1574	1605	1660	1413	1565	1200	1734.5	1672.88	1721.88	1398.32	1299.16	1237.59
RLTA1_RS01690	3833.85	0.508315	0.151878	3.34686	0.000817323	0.00926107	4014	4344	4393	3523	4119	2511	4423.3	4527.72	4556.75	3486.39	3419.32	2589.66
RLTA1_RS04375	295.452	0.496628	0.148412	3.34628	0.000819027	0.00926407	314	303	362	242	293	245	346.018	315.814	375.494	239.485	243.229	252.675
RLTA1_RS00855	304.988	0.518413	0.155015	3.34427	0.000824979	0.00931503	358	343	314	274	295	229	394.504	357.506	325.704	271.152	244.889	236.174
RLTA1_RS24605	461.728	-0.584061	0.174676	-3.34368	0.000826763	0.00931882	356	358	331	661	662	444	392.301	373.14	343.338	654.131	549.548	457.909
RLTA1_RS21765	510.11	-0.553391	0.165582	-3.3421	0.000831457	0.00935535	349	386	437	517	748	667	384.587	402.325	453.289	511.627	620.94	687.894
RLTA1_RS00825	2108.05	0.465497	0.139471	3.3376	0.000845065	0.00947533	2013	2429	2493	1934	2208	1518	2218.26	2531.73	2585.93	1913.9	1832.93	1565.55
RLTA1_RS23035	1151.27	-0.512755	0.153622	-3.33777	0.000844538	0.00947533	850	784	1053	1335	1542	1416	936.673	817.157	1092.25	1321.13	1280.07	1460.36
RLTA1_RS23150	3316.09	0.569325	0.170668	3.33586	0.000850368	0.0095182	4107	3625	3453	2346	3033	3075	4525.78	3778.31	3581.71	2321.62	2517.79	3171.33
RLTA1_RS20945	2418.76	0.438263	0.131447	3.33413	0.000855652	0.00956072	2493	2452	2937	2033	2321	2157	2747.21	2555.7	3046.48	2011.87	1926.74	2224.57
RLTA1_RS16835	7488.78	0.333212	0.0999722	3.33305	0.00085901	0.0095816	7451	7935	8260	6955	7900	6247	8210.76	8270.59	8567.89	6882.72	6558.05	6442.69
RLTA1_RS10115	1056.8	1.13071	0.339502	3.33048	0.000866948	0.00965343	1183	1422	1511	1016	823	290	1303.63	1482.14	1567.32	1005.44	683.199	299.084
RLTA1_RS15070	16400.9	0.440426	0.132316	3.3286	0.00087284	0.00968551	16493	18649	18358	16021	15740	12440	18174.8	19437.7	19042.3	15854.5	13066.3	12829.7
RLTA1_RS34010	187.181	-0.582146	0.17488	-3.32884	0.000872096	0.00968551	138	133	153	251	239	220	152.072	138.625	158.703	248.391	198.402	226.892
RLTA1_RS24575	3283.09	0.328388	0.098772	3.32471	0.000885119	0.00980486	3305	3591	3452	2919	3543	2815	3642	3742.87	3580.67	2888.66	2941.16	2903.18
RLTA1_RS33820	263.951	0.552079	0.166242	3.32094	0.000897137	0.00992092	268	291	330	201	239	238	295.327	303.307	342.301	198.911	198.402	245.456
RLTA1_RS35185	420.829	0.587903	0.177268	3.31646	0.00091165	0.0100641	380	492	564	318	453	308	418.748	512.808	585.023	314.695	376.05	317.648
RLTA1_RS02415	141.676	-0.759646	0.229144	-3.31515	0.00091594	0.0100906	89	116	93	140	210	215	98.0751	120.906	96.4666	138.545	174.328	221.735
RLTA1_RS23820	829.359	-0.429213	0.129485	-3.31477	0.000917183	0.0100906	673	627	700	973	1212	859	741.624	653.517	726.092	962.888	1006.12	885.909
RLTA1_RS16075	6052.1	0.457682	0.13815	3.31294	0.000923204	0.0101395	6386	6498	6943	5937	5535	4684	7037.17	6772.81	7201.8	5875.3	4594.79	4830.73
RLTA1_RS08110	113.622	0.66414	0.200639	3.31012	0.000932554	0.0101984	129	139	126	77	102	100	142.154	144.879	130.697	76.1998	84.6736	103.133
RLTA1_RS13865	9379.79	0.447893	0.135323	3.30981	0.000933604	0.0101984	10724	9631	10235	8926	8815	7423	11817.5	10038.3	10616.5	8833.24	7317.62	7655.53
RLTA1_RS17195	215.917	-0.61284	0.185114	-3.3106	0.000930969	0.0101984	155	145	183	296	267	261	170.805	151.132	189.821	292.924	221.646	269.176
RLTA1_RS24725	1841.04	-0.526536	0.159102	-3.30942	0.00093491	0.0101984	1617	1251	1389	2036	2609	2268	1781.88	1303.91	1440.77	2014.84	2165.82	2339.05
RLTA1_RS27470	1373.96	0.661702	0.200046	3.30775	0.000940488	0.0102419	1342	2074	1360	1120	1395	898	1478.84	2161.71	1410.69	1108.36	1158.04	926.13
RLTA1_RS01950	6696.42	0.572817	0.173237	3.30655	0.000944521	0.0102512	6908	7509	8278	6746	5827	4499	7612.39	7826.57	8586.56	6675.89	4837.19	4639.93
RLTA1_RS25920	1375.66	-1.05939	0.320391	-3.30655	0.000944508	0.0102512	748	815	967	1593	3577	1000	824.272	849.468	1003.04	1576.44	2969.39	1031.33
RLTA1_RS21195	177.232	-0.534391	0.161912	-3.3005	0.000965116	0.0104571	133	140	137	203	267	200	146.562	145.921	142.107	200.89	221.646	206.265
RLTA1_RS31320	627.214	0.713839	0.216603	3.29561	0.000982078	0.0106229	495	817	907	513	590	415	545.474	851.552	940.808	507.669	489.778	428
RLTA1_RS06525	779.585	0.542629	0.164933	3.29	0.00100187	0.0108154	708	1023	893	636	699	674	780.193	1066.26	926.287	629.39	580.263	695.114
RLTA1_RS26900	479.181	0.579272	0.176091	3.28962	0.00100323	0.0108154	459	599	571	451	467	309	505.803	624.333	592.284	446.313	387.672	318.68
RLTA1_RS08580	27288.8	0.426055	0.129599	3.28748	0.00101088	0.0108797	29790	29375	29329	26461	25528	21805	32827.6	30617.3	30422.2	26186	21191.6	22488.1
RLTA1_RS02385	1219.09	-0.460603	0.140137	-3.28681	0.00101329	0.0108874	1022	855	1023	1359	1695	1439	1126.21	891.16	1061.13	1344.88	1407.08	1484.08
RLTA1_RS09625	34255.3	0.531006	0.161639	3.28514	0.00101932	0.0109339	39899	33037	41519	29339	37370	23278	43967.4	34434.2	43066.6	29034.1	31022.1	24007.2
RLTA1_RS25345	4426.08	0.763147	0.232564	3.28145	0.00103275	0.0110595	4790	4551	6449	3539	4904	2203	5278.43	4743.47	6689.39	3502.22	4070.97	2272.01
RLTA1_RS11975	608.553	-0.448556	0.136813	-3.27861	0.00104319	0.0111425	512	455	488	670	893	681	564.208	474.243	506.19	663.037	741.309	702.333
RLTA1_RS16370	446.093	-0.450109	0.137295	-3.2784	0.00104396	0.0111425	358	362	347	528	660	460	394.504	377.31	359.934	522.513	547.888	474.41
RLTA1_RS15460	12597.5	0.874649	0.266841	3.2778	0.00104621	0.011148	15338	16091	14689	13416	8937	5798	16902	16771.5	15236.5	13276.6	7418.9	5979.63
RLTA1_RS10465	718.082	0.376867	0.11502	3.27652	0.00105093	0.0111798	737	782	778	643	762	587	812.15	815.072	807	636.318	632.561	605.388
RLTA1_RS20530	2630.42	-0.801922	0.245435	-3.26735	0.00108558	0.0115294	2087	1292	2031	4135	4147	2419	2299.81	1346.64	2106.71	4092.03	3442.56	2494.78
RLTA1_RS01260	37139.2	0.38058	0.116522	3.26617	0.00109013	0.0115415	36319	40751	41967	35186	35938	31177	40022.4	42474.4	43531.3	34820.3	29833.3	32153.6
RLTA1_RS26290	468.283	-0.523317	0.160249	-3.26566	0.0010921	0.0115415	348	364	376	464	701	597	383.485	379.394	390.015	459.178	581.923	615.701
RLTA1_RS29435	900.489	0.442468	0.135474	3.26607	0.0010905	0.0115415	1003	1005	925	719	891	814	1105.27	1047.5	959.479	711.528	739.649	839.499
RLTA1_RS13290	26978.1	0.524689	0.160734	3.26432	0.00109727	0.0115771	31517	28760	29678	26785	23540	19712	34730.7	29976.3	30784.2	26506.6	19541.3	20329.5
RLTA1_RS24520	2074.72	-0.536579	0.164457	-3.26273	0.00110345	0.0116232	1676	1360	1750	2799	2624	2347	1846.9	1417.52	1815.23	2769.91	2178.27	2420.52
RLTA1_RS12025	166.713	-0.935895	0.287235	-3.25829	0.00112086	0.0117379	95	115	115	202	381	136	104.687	119.864	119.287	199.901	316.281	140.26
RLTA1_RS16240	575.572	-0.433965	0.133196	-3.2581	0.00112163	0.0117379	423	458	506	684	741	672	466.132	477.37	524.861	676.892	615.129	693.051
RLTA1_RS25395	568.599	0.458447	0.140686	3.25867	0.00111937	0.0117379	576	645	644	520	605	407	634.733	672.278	668.005	514.596	502.23	419.75
RLTA1_RS33550	132.875	-1.19149	0.365561	-3.25933	0.00111675	0.0117379	88	69	71	147	124	297	96.9732	71.9181	73.6465	145.472	102.936	306.304
RLTA1_RS07875	2582.65	0.389286	0.119504	3.25753	0.00112387	0.0117422	2792	2806	2685	2193	2551	2348	3076.69	2924.67	2785.08	2170.21	2117.67	2421.55
RLTA1_RS24925	741.013	0.46636	0.143262	3.25529	0.00113277	0.011816	778	916	740	588	797	604	857.331	954.739	767.583	581.889	661.616	622.921
RLTA1_RS04050	916.883	0.62668	0.192577	3.25418	0.0011372	0.011824	807	1231	1125	763	978	577	889.288	1283.06	1166.93	755.071	811.87	595.075
RLTA1_RS30770	146.755	0.878578	0.26995	3.2546	0.00113552	0.011824	223	125	187	123	97	105	245.739	130.286	193.97	121.722	80.5229	108.289
RLTA1_RS22165	2758.59	-0.374668	0.115315	-3.24907	0.00115782	0.0120166	2057	2312	2439	3196	3529	3154	2266.75	2409.78	2529.91	3162.79	2929.54	3252.8
RLTA1_RS35915	99.7152	-0.664681	0.204601	-3.24867	0.00115946	0.0120166	76	66	76	136	137	115	83.7496	68.7913	78.8329	134.587	113.728	118.602
RLTA1_RS07585	31277.7	1.15372	0.355381	3.24643	0.00116863	0.0120777	31170	51514	39943	29504	24599	8315	34348.3	53692.6	41431.9	29197.4	20420.4	8575.47
RLTA1_RS28330	939.841	-0.630797	0.194312	-3.24631	0.00116911	0.0120777	576	817	700	939	1335	1347	634.733	851.552	726.092	929.241	1108.23	1389.2
RLTA1_RS05600	161.028	-0.666654	0.205455	-3.24477	0.00117546	0.0121238	110	132	111	192	287	159	121.216	137.583	115.138	190.005	238.248	163.981
RLTA1_RS28135	770.519	0.594256	0.183301	3.24197	0.00118708	0.0122241	813	823	991	690	823	461	895.9	857.806	1027.94	682.829	683.199	475.441
RLTA1_RS13175	1106.61	0.491039	0.151716	3.23656	0.00120978	0.0124379	1284	1238	1132	1061	1065	801	1414.93	1290.36	1174.2	1049.97	884.092	826.092
RLTA1_RS14205	387.076	0.545687	0.168663	3.23537	0.00121483	0.01247	393	459	449	322	315	354	433.073	478.412	465.736	318.654	261.492	365.089
RLTA1_RS15285	312.473	-0.518911	0.160414	-3.23481	0.00121722	0.0124746	227	264	236	356	402	406	250.147	275.165	244.797	352.3	333.713	418.718
RLTA1_RS09990	1821.53	-0.550822	0.170362	-3.23324	0.00122396	0.0125039	1297	1527	1363	1993	3189	1818	1429.25	1591.58	1413.81	1972.29	2647.29	1874.95
RLTA1_RS17175	1513.47	0.493837	0.152728	3.23344	0.00122307	0.0125039	1390	1731	1903	1399	1502	1105	1531.74	1804.21	1973.93	1384.46	1246.86	1139.61
RLTA1_RS02665	4457.95	-0.430941	0.133315	-3.23251	0.00122708	0.0125158	3844	3244	3639	5014	6524	4827	4235.96	3381.19	3774.64	4961.89	5415.79	4978.21
RLTA1_RS15780	1789.62	0.621702	0.192393	3.23142	0.00123177	0.0125438	2161	1968	2000	1614	1259	1540	2381.35	2051.23	2074.55	1597.23	1045.14	1588.24
RLTA1_RS07210	2988.8	-0.470233	0.145606	-3.22949	0.00124009	0.0126086	2618	2081	2376	3517	4356	3217	2884.95	2169.01	2464.57	3480.45	3616.06	3317.77
RLTA1_RS11790	437.807	0.441265	0.13681	3.22539	0.00125802	0.0127506	479	483	464	407	426	347	527.843	503.427	481.296	402.77	353.637	357.87
RLTA1_RS32265	1240.72	0.361647	0.11211	3.22583	0.00125609	0.0127506	1279	1273	1398	1123	1310	1027	1409.42	1326.84	1450.11	1111.33	1087.47	1059.17
RLTA1_RS25835	212.612	0.575242	0.178457	3.22342	0.0012667	0.0128183	226	224	270	177	176	186	249.045	233.473	280.064	175.161	146.103	191.827
RLTA1_RS33785	596.852	0.448379	0.139283	3.21921	0.00128546	0.0129878	662	689	597	539	615	456	729.503	718.139	619.253	533.398	510.532	470.285
RLTA1_RS29825	1864.21	-0.981864	0.305219	-3.21692	0.00129575	0.0130713	1564	816	1143	2359	1976	3346	1723.48	850.51	1185.61	2334.48	1640.34	3450.82
RLTA1_RS19965	2952.79	0.352232	0.109585	3.21423	0.00130795	0.0131736	2857	3227	3300	2531	3281	2476	3148.32	3363.48	3423.01	2504.7	2723.67	2553.56
RLTA1_RS11535	180.158	-0.519407	0.161718	-3.2118	0.00131907	0.0132649	134	143	142	208	246	220	147.664	149.048	147.293	205.838	204.213	226.892
RLTA1_RS02015	452.937	-0.516069	0.160745	-3.21049	0.0013251	0.0132801	321	349	387	512	744	460	353.732	363.76	401.425	506.679	617.619	474.41
RLTA1_RS02855	4166.1	-0.453707	0.141341	-3.21002	0.00132728	0.0132801	3576	2938	3419	4542	5853	4939	3940.64	3062.25	3546.44	4494.8	4858.77	5093.72
RLTA1_RS15600	587.705	-0.450991	0.14051	-3.20968	0.00132883	0.0132801	439	503	464	638	780	735	483.764	524.273	481.296	631.37	647.504	758.024
RLTA1_RS19185	846.009	-0.441127	0.1374	-3.21053	0.00132491	0.0132801	707	679	642	965	1089	1032	779.091	707.716	665.931	954.971	904.015	1064.33
RLTA1_RS11715	810.34	0.533168	0.166443	3.2033	0.00135863	0.0135164	957	914	836	664	676	746	1054.58	952.655	867.162	657.099	561.17	769.369
RLTA1_RS12355	954.226	-0.892371	0.27854	-3.20374	0.00135655	0.0135164	661	549	679	1509	1843	676	728.401	572.218	704.31	1493.32	1529.94	697.176
RLTA1_RS20430	3343.09	0.495211	0.154596	3.20327	0.00135878	0.0135164	3994	3425	3628	3130	3409	2324	4401.26	3569.85	3763.23	3097.47	2829.92	2396.8
RLTA1_RS20150	960.654	0.370621	0.115741	3.20216	0.00136403	0.0135477	934	1076	1060	859	1030	784	1029.24	1121.51	1099.51	850.073	855.037	808.559
RLTA1_RS29235	305.412	0.552368	0.172561	3.201	0.00136952	0.0135812	291	378	361	291	274	221	320.673	393.986	374.456	287.976	227.456	227.923
RLTA1_RS29475	37203.6	-1.0182	0.318172	-3.20015	0.00137354	0.0136002	26308	17975	25121	60258	78199	24135	28990.6	18735.2	26057.4	59631.8	64915.6	24891
RLTA1_RS02445	3970.29	-0.542238	0.169538	-3.19833	0.00138226	0.0136236	3177	2530	3433	5092	6019	3963	3500.95	2637	3560.96	5039.08	4996.57	4087.14
RLTA1_RS11610	11313	-0.640275	0.200182	-3.19847	0.00138159	0.0136236	8882	6852	9255	16715	16793	10537	9787.68	7141.78	9599.98	16541.3	13940.4	10867.1
RLTA1_RS32270	2521.56	0.43376	0.135617	3.19842	0.00138184	0.0136236	2822	2533	2838	2375	2577	1887	3109.75	2640.13	2943.79	2350.32	2139.25	1946.11
RLTA1_RS14485	265.78	-0.566339	0.177106	-3.19775	0.00138506	0.0136304	179	210	219	314	445	263	197.252	218.881	227.163	310.737	369.409	271.239
RLTA1_RS09455	5088.19	-0.781042	0.24463	-3.19276	0.00140922	0.0138409	3790	2927	3860	7644	9119	4037	4176.46	3050.79	4003.88	7564.56	7569.98	4163.46
RLTA1_RS22705	160.491	-0.557924	0.174764	-3.19244	0.00141076	0.0138409	117	126	125	179	257	177	128.93	131.329	129.659	177.14	213.344	182.545
RLTA1_RS01840	694.3	-0.525032	0.164693	-3.18795	0.00143284	0.0140362	522	543	547	679	1148	807	575.227	565.964	567.389	671.943	952.993	832.28
RLTA1_RS19845	2519.64	-0.403258	0.126526	-3.18715	0.00143682	0.0140537	1973	2055	2114	2672	3319	3112	2174.18	2141.91	2192.8	2644.23	2755.21	3209.49
RLTA1_RS12525	1454.27	-0.463504	0.145452	-3.18665	0.00143932	0.0140568	988	1118	1363	1618	2114	1650	1088.74	1165.28	1413.81	1601.18	1754.9	1701.69
RLTA1_RS25610	396.305	0.518393	0.162707	3.18605	0.00144227	0.0140644	412	474	435	336	331	360	454.011	494.046	451.215	332.508	274.774	371.277
RLTA1_RS05350	1349.02	0.472183	0.148424	3.1813	0.00146614	0.0142754	1324	1756	1363	1170	1295	1123	1459.01	1830.26	1413.81	1157.84	1075.02	1158.18
RLTA1_RS16085	976.611	-0.583108	0.183329	-3.18066	0.00146941	0.0142857	658	776	783	1297	1608	868	725.095	808.818	812.186	1283.52	1334.85	895.191
RLTA1_RS20895	685.269	0.492364	0.154862	3.17937	0.00147595	0.0143276	778	706	781	663	660	489	857.331	735.858	810.112	656.11	547.888	504.318
RLTA1_RS03005	172.425	0.594905	0.187241	3.17722	0.00148696	0.014412	181	206	200	136	139	158	199.456	214.712	207.455	134.587	115.388	162.949
RLTA1_RS30270	773.233	0.710214	0.223563	3.1768	0.00148912	0.014412	686	1157	885	636	816	439	755.95	1205.93	917.988	629.39	677.389	452.752
RLTA1_RS15490	479.05	-0.535122	0.168504	-3.17572	0.00149463	0.0144436	324	362	423	515	639	641	357.038	377.31	438.767	509.648	530.455	661.08
RLTA1_RS01790	1347.75	-0.497126	0.156794	-3.17057	0.0015214	0.0146803	979	1036	1152	1315	2059	1670	1078.83	1079.81	1194.94	1301.33	1709.24	1722.31
RLTA1_RS18560	449.98	-0.535991	0.169177	-3.16823	0.00153371	0.0147769	334	300	406	486	635	572	368.057	312.688	421.134	480.949	527.134	589.918
RLTA1_RS03255	3780.36	0.41104	0.129907	3.16411	0.00155559	0.0149653	3508	4332	4400	3360	3612	3310	3865.7	4515.21	4564.01	3325.08	2998.44	3413.69
RLTA1_RS09985	1051.58	-0.674116	0.21327	-3.16085	0.00157308	0.015111	828	696	764	1303	1148	1587	912.429	725.435	792.478	1289.46	952.993	1636.71
RLTA1_RS06135	493.988	-0.561227	0.177702	-3.15825	0.0015872	0.0152238	389	343	397	620	813	463	428.665	357.506	411.798	613.557	674.898	477.504
RLTA1_RS03700	2036.72	-0.583535	0.184909	-3.1558	0.00160059	0.0153121	1499	1463	1652	2502	2273	2877	1651.85	1524.87	1713.58	2476	1886.89	2967.12
RLTA1_RS20415	1049.71	-0.639425	0.202626	-3.1557	0.00160116	0.0153121	886	658	772	1502	1627	968	976.343	685.828	800.776	1486.39	1350.63	998.323
RLTA1_RS33610	2713.45	0.463465	0.147007	3.15267	0.00161785	0.0154302	2860	2677	3370	2334	3005	1977	3151.63	2790.22	3495.62	2309.74	2494.55	2038.93
RLTA1_RS34125	159.996	-0.541764	0.171847	-3.15259	0.0016183	0.0154302	119	135	115	193	239	174	131.134	140.709	119.287	190.994	198.402	179.451
RLTA1_RS22525	16161.2	-0.607426	0.192757	-3.15125	0.00162574	0.0154782	12377	10692	13152	23696	24337	14437	13639.1	11144.2	13642.2	23449.7	20202.9	14889.2
RLTA1_RS13940	228.138	0.585772	0.185978	3.14969	0.00163446	0.0155383	255	302	218	189	236	159	281.002	314.772	226.126	187.036	195.911	163.981
RLTA1_RS18825	1658.04	-0.50756	0.161301	-3.14667	0.0016514	0.0156698	1251	1140	1486	2215	2341	1653	1378.56	1188.21	1541.39	2191.98	1943.34	1704.78
RLTA1_RS27215	214.181	0.726683	0.23096	3.14636	0.00165317	0.0156698	204	310	244	120	209	186	224.801	323.11	253.095	118.753	173.498	191.827
RLTA1_RS33735	684.813	-0.458881	0.145894	-3.14529	0.00165921	0.0157039	498	528	608	782	869	857	548.78	550.33	630.663	773.873	721.386	883.846
RLTA1_RS04650	89.1158	-0.682783	0.217153	-3.14425	0.00166513	0.0157368	62	71	61	105	152	96	68.322	74.0027	63.2738	103.909	126.18	99.0073
RLTA1_RS34640	979.252	0.421001	0.133934	3.14335	0.00167026	0.0157622	1047	1075	1051	842	1118	727	1153.76	1120.46	1090.18	833.25	928.089	749.774
RLTA1_RS19200	80117.1	-0.917791	0.29214	-3.14161	0.00168019	0.0157865	58562	41351	56634	145712	133183	57758	64533.4	43099.8	58745	144198	110560	59567.3
RLTA1_RS19255	14579.7	-0.929632	0.295859	-3.14214	0.00167718	0.0157865	10090	7650	10627	25780	25905	10032	11118.9	7973.53	11023.1	25512.1	21504.6	10346.3
RLTA1_RS23510	13834.2	1.02879	0.327463	3.14171	0.00167965	0.0157865	14070	21219	17433	13317	11730	4252	15504.7	22116.4	18082.8	13178.6	9737.46	4385.2
RLTA1_RS02780	1403.56	0.518182	0.164979	3.1409	0.00168431	0.0158021	1439	1426	1819	1343	1360	974	1585.73	1486.31	1886.8	1329.04	1128.98	1004.51
RLTA1_RS11900	978.014	-0.551408	0.175646	-3.13931	0.00169345	0.0158416	677	725	847	1349	1474	901	746.032	755.662	878.572	1334.98	1223.62	929.224
RLTA1_RS23850	499.003	0.434461	0.138377	3.1397	0.00169122	0.0158416	464	588	575	421	519	413	511.313	612.868	596.433	416.625	430.839	425.938
RLTA1_RS35010	13827.9	-0.511371	0.163191	-3.13358	0.0017269	0.0161311	11722	9119	11362	15354	18322	17798	12917.3	9504.66	11785.5	15194.4	15209.7	18355.5
RLTA1_RS02110	808.467	0.396445	0.126587	3.13179	0.00173746	0.0162062	848	877	875	773	788	655	934.469	914.09	907.616	764.967	654.145	675.518
RLTA1_RS01585	175.251	-0.639352	0.204452	-3.12715	0.00176509	0.0164163	132	134	121	232	201	237	145.46	139.667	125.51	229.589	166.857	244.424
RLTA1_RS28370	4072.7	0.458759	0.146695	3.1273	0.00176421	0.0164163	4418	4380	4542	3886	4302	2787	4868.49	4565.24	4711.3	3845.61	3571.23	2874.3
RLTA1_RS17445	990.079	0.433951	0.138793	3.12662	0.0017683	0.0164225	1021	1002	1200	866	1089	742	1125.11	1044.38	1244.73	857	904.015	765.244
RLTA1_RS24465	696.861	0.529197	0.169312	3.12558	0.00177455	0.0164567	708	781	843	623	550	620	780.193	814.03	874.423	616.525	456.573	639.422
RLTA1_RS29970	5620.82	-0.622143	0.199179	-3.12353	0.00178697	0.0165481	4360	3517	4639	8207	8526	5084	4804.58	3665.74	4811.92	8121.71	7077.71	5243.26
RLTA1_RS01710	296.632	-0.458853	0.146957	-3.12237	0.00179404	0.0165897	218	226	264	337	428	331	240.229	235.558	273.841	333.498	355.297	341.369
RLTA1_RS01000	944.026	-0.509726	0.163502	-3.11756	0.00182355	0.0167057	853	643	701	1165	1328	1039	939.979	670.194	727.13	1152.89	1102.42	1071.55
RLTA1_RS05035	5860.12	0.314065	0.10076	3.11695	0.00182732	0.0167057	5633	6368	6403	5342	6334	4974	6207.38	6637.31	6641.67	5286.48	5258.06	5129.81
RLTA1_RS07415	797.483	0.527679	0.169216	3.11837	0.00181855	0.0167057	1017	836	803	730	713	626	1120.7	871.356	832.932	722.413	591.885	645.61
RLTA1_RS07645	8981.14	-0.339371	0.108858	-3.11755	0.00182359	0.0167057	7002	7365	8095	10339	12463	9231	7715.98	7676.48	8396.74	10231.6	10345.9	9520.17
RLTA1_RS14740	11506.6	0.324945	0.104171	3.11936	0.00181247	0.0167057	10916	12445	12909	10432	12159	9921	12029.1	12971.3	13390.2	10323.6	10093.6	10231.8
RLTA1_RS16070	544.527	0.481842	0.154546	3.1178	0.00182208	0.0167057	579	622	596	497	593	367	638.039	648.306	618.216	491.835	492.269	378.497
RLTA1_RS18125	987.203	-0.513114	0.164522	-3.11882	0.00181578	0.0167057	881	662	752	1240	1411	1051	970.834	689.997	780.031	1227.11	1171.32	1083.92
RLTA1_RS21410	1370.15	-0.435361	0.139676	-3.11695	0.00182735	0.0167057	964	1111	1229	1666	2006	1369	1062.3	1157.99	1274.81	1648.69	1665.25	1411.88
RLTA1_RS04360	576.233	-0.620972	0.199349	-3.115	0.00183946	0.0167688	324	489	478	641	1009	604	357.038	509.681	495.817	634.338	837.604	622.921
RLTA1_RS19245	354.343	-0.587344	0.188541	-3.1152	0.00183819	0.0167688	205	280	320	411	578	378	225.903	291.842	331.928	406.729	479.817	389.841
RLTA1_RS07350	2848.33	0.452149	0.145257	3.11275	0.0018535	0.0168729	2986	3143	3188	2818	2832	2014	3290.48	3275.92	3306.83	2788.71	2350.94	2077.09
RLTA1_RS09400	7380.49	-0.375889	0.120861	-3.1101	0.00187026	0.0170014	6304	5583	6274	8454	10388	7776	6946.81	5819.12	6507.86	8366.14	8623.42	8019.59
RLTA1_RS22725	691.216	-0.51362	0.165308	-3.10704	0.00188969	0.0171538	527	507	577	833	814	911	580.737	528.442	598.508	824.343	675.728	939.538
RLTA1_RS13335	1026.83	0.385925	0.124308	3.10459	0.00190541	0.0172722	1068	1184	1040	948	1023	857	1176.9	1234.07	1078.77	938.148	849.226	883.846
RLTA1_RS33690	8099.13	0.56608	0.182401	3.10349	0.00191256	0.0173125	8614	9335	9431	7543	8734	4727	9492.35	9729.79	9782.54	7464.61	7250.38	4875.08
RLTA1_RS13135	999.414	0.431707	0.139331	3.09843	0.00194552	0.0175369	1089	1060	1097	951	899	840	1200.04	1104.83	1137.89	941.117	746.29	866.314
RLTA1_RS18380	1562.6	-0.471965	0.152306	-3.0988	0.00194307	0.0175369	1243	1127	1334	2039	2253	1512	1369.75	1174.66	1383.72	2017.81	1870.29	1559.36
RLTA1_RS33300	1149.99	0.385973	0.124549	3.09896	0.00194204	0.0175369	1114	1285	1294	1040	1261	887	1227.59	1339.35	1342.23	1029.19	1046.8	914.786
RLTA1_RS02965	464.102	-0.560024	0.180795	-3.09756	0.00195118	0.0175634	315	363	385	493	593	659	347.12	378.352	399.351	487.876	492.269	679.644
RLTA1_RS16335	2345.61	-0.399854	0.129216	-3.09446	0.00197173	0.0177236	2060	1764	1889	2740	3141	2605	2270.05	1838.6	1959.41	2711.52	2607.45	2686.6
RLTA1_RS00810	2620.63	0.548771	0.177527	3.09119	0.00199356	0.0178948	2991	2722	3092	2251	3001	1614	3295.99	2837.12	3207.25	2227.61	2491.23	1664.56
RLTA1_RS35920	151.98	-0.649645	0.2102	-3.09061	0.00199747	0.0179049	101	108	126	163	200	223	111.299	112.568	130.697	161.306	166.027	229.986
RLTA1_RS30175	525.528	-0.655838	0.212281	-3.08947	0.00200512	0.0179484	398	380	376	786	837	442	438.583	396.071	390.015	777.831	694.821	455.846
RLTA1_RS05235	2111.52	-0.490007	0.158777	-3.08613	0.0020278	0.0181263	1648	1605	1717	2414	3521	2024	1816.04	1672.88	1781	2388.91	2922.9	2087.4
RLTA1_RS12230	757.316	0.493493	0.159933	3.08562	0.00203126	0.018132	725	863	924	723	764	521	798.927	899.498	958.442	715.486	634.222	537.321
RLTA1_RS00510	960.958	0.389351	0.12628	3.08322	0.00204772	0.0182537	904	1107	1079	806	998	844	996.179	1153.82	1119.22	797.624	828.473	870.439
RLTA1_RS34235	513.615	0.600792	0.194888	3.08275	0.00205096	0.0182572	459	686	614	358	588	370	505.803	715.012	636.887	354.279	488.118	381.591
RLTA1_RS31310	2055.25	0.836762	0.271472	3.08231	0.002054	0.0182591	1882	2607	3002	2164	1489	1017	2073.9	2717.25	3113.9	2141.51	1236.07	1048.86
RLTA1_RS02885	1307.71	0.584003	0.189705	3.07848	0.0020806	0.01847	1565	1709	1158	1116	1353	884	1724.58	1781.28	1201.16	1104.4	1123.17	911.692
RLTA1_RS11730	709.027	-0.575343	0.187107	-3.07495	0.00210539	0.0186386	509	567	537	979	1130	619	560.902	590.979	557.017	968.826	938.05	638.391
RLTA1_RS17075	150.233	-0.56952	0.185188	-3.07536	0.00210252	0.0186386	119	97	126	191	211	169	131.134	101.102	130.697	189.015	175.158	174.294
RLTA1_RS17985	286.305	-0.632137	0.205745	-3.07243	0.00212327	0.0187197	221	200	214	429	428	256	243.535	208.458	221.977	424.542	355.297	264.019
RLTA1_RS22520	2850.03	-0.852764	0.277492	-3.07312	0.00211836	0.0187197	2244	1577	1907	4845	4853	2116	2472.82	1643.69	1978.08	4794.65	4028.64	2182.29
RLTA1_RS33660	839.113	-0.421908	0.137315	-3.07256	0.00212232	0.0187197	636	722	673	887	1120	1043	700.852	752.535	698.086	877.782	929.749	1075.67
RLTA1_RS02620	643.824	-0.470136	0.153046	-3.07185	0.00212734	0.0187299	530	496	500	652	920	809	584.043	516.977	518.637	645.224	763.722	834.343
RLTA1_RS03880	1588.6	0.403619	0.131547	3.06825	0.00215317	0.018881	1477	1753	1902	1325	1610	1412	1627.61	1827.14	1972.9	1311.23	1336.51	1456.23
RLTA1_RS05410	6787.59	-0.738754	0.240763	-3.06838	0.0021522	0.018881	5441	3678	5236	10864	10370	5920	5995.81	3833.55	5431.17	10751.1	8608.48	6105.45
RLTA1_RS10230	159.795	-0.592399	0.193075	-3.06823	0.0021533	0.018881	122	115	124	173	275	171	134.44	119.864	128.622	171.202	228.287	176.357
RLTA1_RS13850	116.628	0.609029	0.198602	3.06658	0.00216523	0.0189568	138	144	116	100	103	90	152.072	150.09	120.324	98.9607	85.5037	92.8193
RLTA1_RS23155	10131.3	0.541756	0.176709	3.06581	0.00217078	0.0189568	11123	10526	12345	10020	7912	8019	12257.2	10971.2	12805.2	9915.87	6568.01	8270.2
RLTA1_RS23360	3118.13	-0.401928	0.131087	-3.06612	0.00216857	0.0189568	2424	2736	2446	3867	4415	3061	2671.17	2851.71	2537.17	3826.81	3665.04	3156.89
RLTA1_RS00800	4021.28	0.534426	0.174373	3.06485	0.00217782	0.0189925	4067	4632	4786	3455	4659	2489	4481.7	4827.9	4964.4	3419.09	3867.59	2566.97
RLTA1_RS20915	1639.27	-0.706798	0.230709	-3.0636	0.00218692	0.019046	1116	1130	1282	1894	3344	1404	1229.8	1177.79	1329.79	1874.32	2775.96	1447.98
RLTA1_RS19830	1227.85	-0.763746	0.249402	-3.06231	0.00219639	0.0191027	897	786	890	2107	1873	966	988.465	819.241	923.175	2085.1	1554.84	996.261
RLTA1_RS34715	4384	0.402051	0.131344	3.06105	0.00220559	0.0191568	4345	4962	4833	4215	4607	3234	4788.05	5171.85	5013.15	4171.2	3824.42	3335.31
RLTA1_RS25925	1341.62	-0.766235	0.250363	-3.0605	0.00220969	0.0191665	940	898	973	1732	2754	1036	1035.85	935.978	1009.27	1714	2286.19	1068.45
RLTA1_RS34150	1330.62	0.776147	0.25367	3.05967	0.00221579	0.0191936	1374	1889	1502	1219	1360	589	1514.1	1968.89	1557.99	1206.33	1128.98	607.451
RLTA1_RS20900	1104.49	0.362255	0.118436	3.05864	0.00222342	0.0192314	1143	1116	1258	994	1192	898	1259.55	1163.2	1304.89	983.67	989.519	926.13
RLTA1_RS31700	803.792	-0.959169	0.31363	-3.05828	0.00222613	0.0192314	478	560	509	1274	1701	496	526.741	583.683	527.973	1260.76	1412.06	511.538
RLTA1_RS00375	434.003	0.546542	0.178823	3.05633	0.00224067	0.019331	479	467	513	363	503	272	527.843	486.75	532.122	359.228	417.557	280.521
RLTA1_RS06235	563.598	-0.621331	0.20338	-3.05503	0.0022504	0.019389	403	388	467	664	1039	513	444.093	404.409	484.407	657.099	862.508	529.07
RLTA1_RS18230	209.551	-0.695549	0.227952	-3.05129	0.00227861	0.0196058	148	153	152	325	330	176	163.091	159.471	157.666	321.622	273.944	181.513
RLTA1_RS07680	2221.42	-0.605309	0.198524	-3.04905	0.0022957	0.0197264	1600	1313	2077	2444	3014	3027	1763.15	1368.53	2154.42	2418.6	2502.02	3121.82
RLTA1_RS20980	1964.91	0.371423	0.121877	3.04753	0.00230734	0.0198	2055	1979	2239	1830	2093	1543	2264.54	2062.7	2322.46	1810.98	1737.47	1591.34
RLTA1_RS22925	160.249	-0.609248	0.199989	-3.04641	0.00231595	0.0198475	111	130	118	182	200	228	122.318	135.498	122.398	180.109	166.027	235.142
RLTA1_RS28890	49309.5	0.295645	0.0970976	3.04482	0.00232819	0.0199258	50034	51120	52652	46117	51483	43099	55135.9	53282	54614.6	45637.7	42737.7	44449.1
RLTA1_RS19115	1308.2	-0.498925	0.163921	-3.0437	0.0023369	0.0199739	1001	882	1186	1752	1759	1360	1103.07	919.301	1230.21	1733.79	1460.2	1402.6
RLTA1_RS16830	3359.6	0.325461	0.106976	3.04238	0.00234718	0.0200351	3199	3759	3632	2973	3570	2949	3525.2	3917.98	3767.38	2942.1	2963.57	3041.38
RLTA1_RS00815	5200.84	0.628174	0.206725	3.03869	0.00237605	0.0202279	5994	5560	6312	4434	5995	2805	6605.2	5795.14	6547.28	4387.92	4976.65	2892.87
RLTA1_RS03065	1946.99	0.618244	0.203455	3.03873	0.0023758	0.0202279	2085	2406	2187	1968	1847	1093	2297.6	2507.75	2268.52	1947.55	1533.26	1127.24
RLTA1_RS00405	7436.7	-0.386138	0.127117	-3.03767	0.00238415	0.02027	6112	5683	6443	9194	9265	8231	6735.23	5923.34	6683.16	9098.45	7691.18	8488.84
RLTA1_RS36625	405.54	-0.639475	0.210548	-3.03719	0.00238796	0.0202756	277	290	332	511	738	352	305.245	302.265	344.375	505.689	612.638	363.027
RLTA1_RS01390	552.718	-0.439082	0.144971	-3.02875	0.0024557	0.0207959	399	427	504	593	770	662	439.685	445.059	522.787	586.837	639.202	682.738
RLTA1_RS32930	928.703	0.418753	0.138259	3.02876	0.00245562	0.0207959	854	1126	1034	774	944	810	941.081	1173.62	1072.54	765.956	783.646	835.374
RLTA1_RS10445	662.752	0.451088	0.148984	3.02775	0.00246378	0.0208116	668	828	672	618	629	530	736.114	863.018	697.049	611.577	522.154	546.603
RLTA1_RS25485	238.579	-0.574673	0.189803	-3.02772	0.00246403	0.0208116	158	177	209	245	405	269	174.111	184.486	216.79	242.454	336.204	277.427
RLTA1_RS01860	230.903	-0.705825	0.233193	-3.02679	0.00247166	0.0208215	131	165	203	241	445	243	144.358	171.978	210.567	238.495	369.409	250.612
RLTA1_RS20640	4688.11	-0.764847	0.252688	-3.02684	0.00247124	0.0208215	3582	2603	3626	7451	7829	3718	3947.25	2713.09	3761.16	7373.57	6499.11	3834.47
RLTA1_RS06380	693.573	-0.482797	0.15956	-3.02581	0.00247972	0.020862	552	516	568	766	864	922	608.286	537.823	589.172	758.039	717.235	950.882
RLTA1_RS05835	1018.08	0.419178	0.138661	3.02304	0.00250253	0.0210265	1100	1097	1098	1002	963	798	1212.16	1143.39	1138.93	991.587	799.418	822.998
RLTA1_RS06325	2554.53	-0.755096	0.249905	-3.02153	0.00251503	0.0211039	2142	1325	1891	4055	3968	2247	2360.42	1381.04	1961.49	4012.86	3293.97	2317.39
RLTA1_RS11015	5881.82	0.427271	0.141436	3.02094	0.00251989	0.0211172	6123	6156	6822	5597	6299	4153	6747.35	6416.35	7076.29	5538.83	5229.01	4283.1
RLTA1_RS28775	184.769	-0.542308	0.179571	-3.02002	0.00252756	0.021154	139	128	159	194	282	224	153.174	133.413	164.927	191.984	234.098	231.017
RLTA1_RS36030	2663.91	0.314425	0.104145	3.01911	0.0025352	0.0211903	2683	2725	2952	2411	2795	2345	2956.58	2840.25	3062.04	2385.94	2320.22	2418.46
RLTA1_RS02300	1149.64	-0.409754	0.135788	-3.01761	0.00254776	0.0212677	928	844	1022	1235	1590	1351	1022.63	879.694	1060.1	1222.17	1319.91	1393.32
RLTA1_RS06955	376.75	0.406156	0.134615	3.01717	0.00255144	0.0212688	367	436	414	328	395	310	404.422	454.439	429.432	324.591	327.903	319.711
RLTA1_RS24625	1824.94	0.348771	0.115617	3.01662	0.00255612	0.0212688	1904	1985	1895	1691	1794	1604	2098.15	2068.95	1965.64	1673.43	1489.26	1654.25
RLTA1_RS29765	748.768	0.590903	0.195896	3.01642	0.00255781	0.0212688	990	658	890	669	665	561	1090.95	685.828	923.175	662.047	552.038	578.574
RLTA1_RS21580	6745.45	-0.548658	0.181955	-3.01535	0.0025668	0.021316	4987	4743	5780	9156	10614	5979	5495.51	4943.59	5995.45	9060.85	8811.03	6166.3
RLTA1_RS20125	1768.46	0.549008	0.182119	3.01456	0.00257352	0.0213443	2066	1869	2003	1815	1451	1268	2276.67	1948.04	2077.66	1796.14	1204.52	1307.72
RLTA1_RS21640	7766.89	-0.596808	0.198153	-3.01185	0.0025966	0.0214804	6030	5484	5966	11369	12031	6607	6644.87	5715.93	6188.38	11250.8	9987.33	6813.97
RLTA1_RS22545	47554.4	-0.800886	0.265902	-3.01196	0.00259566	0.0214804	36867	26912	34104	74185	86065	35309	40626.2	28050.2	35375.2	73414	71445.4	36415.1
RLTA1_RS23875	877.254	-0.381761	0.126869	-3.00909	0.00262029	0.0216207	639	719	802	1022	1210	933	704.157	749.408	831.895	1011.38	1004.46	962.227
RLTA1_RS26785	566.893	0.367668	0.122172	3.00944	0.00261732	0.0216207	576	618	614	517	567	488	634.733	644.136	636.887	511.627	470.685	503.287
RLTA1_RS13800	854.76	0.366182	0.12174	3.00789	0.00263065	0.0216784	843	994	890	742	926	715	928.959	1036.04	923.175	734.289	768.703	737.398
RLTA1_RS07130	1803.31	0.476873	0.158731	3.00428	0.00266209	0.0219095	2027	1830	2078	1711	1901	1214	2233.69	1907.39	2155.46	1693.22	1578.08	1252.03
RLTA1_RS02625	172.189	-0.489143	0.162896	-3.00279	0.00267516	0.0219889	123	136	147	202	245	194	135.542	141.752	152.479	199.901	203.383	200.077
RLTA1_RS02560	2628.11	-0.521345	0.173643	-3.00239	0.00267869	0.0219898	2080	1637	2388	3296	3894	2714	2292.09	1706.23	2477.01	3261.75	3232.54	2799.02
RLTA1_RS04340	273.009	-0.531914	0.177187	-3.002	0.00268214	0.0219901	232	199	199	320	343	356	255.657	207.416	206.418	316.674	284.736	367.152
RLTA1_RS05605	283.197	-0.596066	0.198675	-3.00021	0.00269796	0.0220421	195	265	179	299	459	335	214.884	276.207	185.672	295.893	381.031	345.494
RLTA1_RS16460	19772.7	0.609836	0.203323	2.99934	0.00270561	0.0220421	25483	20190	21737	17836	21285	11290	28081.4	21043.9	22547.2	17650.6	17669.4	11643.7
RLTA1_RS17385	4466.74	-0.370956	0.123678	-2.99938	0.00270527	0.0220421	3746	3469	3802	4671	6449	4981	4127.97	3615.71	3943.72	4622.46	5353.53	5137.03
RLTA1_RS24245	1969.02	0.332345	0.110802	2.99944	0.00270477	0.0220421	1933	2227	2056	1776	2024	1738	2130.1	2321.18	2132.64	1757.54	1680.19	1792.44
RLTA1_RS25900	120.439	-0.578192	0.192689	-3.00064	0.00269411	0.0220421	84	86	104	146	188	128	92.5653	89.6371	107.877	144.483	156.065	132.01
RLTA1_RS27565	1321.85	-0.634777	0.211776	-2.99739	0.002723	0.0221558	901	896	1138	1955	2089	1120	992.873	933.893	1180.42	1934.68	1734.15	1155.08
RLTA1_RS34880	1235.46	-0.63409	0.211786	-2.99401	0.00275336	0.0223745	1012	771	951	1752	2007	1074	1115.19	803.607	986.448	1733.79	1666.08	1107.64
RLTA1_RS01215	688.6	0.441982	0.147672	2.99301	0.00276242	0.0224199	769	809	664	603	649	598	847.413	843.214	688.751	596.733	538.756	616.733
RLTA1_RS13710	380.586	0.415955	0.139003	2.99243	0.00276767	0.0224341	396	436	399	329	367	338	436.379	454.439	413.873	325.581	304.659	348.588
RLTA1_RS09450	13193	0.423997	0.141709	2.99204	0.00277121	0.0224346	11784	16140	14986	11288	12851	11603	12985.6	16822.6	15544.6	11170.7	10668	11966.5
RLTA1_RS26855	206.003	0.547982	0.183373	2.98835	0.00280488	0.0226786	205	269	220	173	224	140	225.903	280.377	228.2	171.202	185.95	144.386
RLTA1_RS16425	185.477	-0.549048	0.183764	-2.98778	0.00281011	0.0226924	128	136	163	248	272	184	141.052	141.752	169.076	245.423	225.796	189.764
RLTA1_RS22430	3954.18	-0.363979	0.121953	-2.98459	0.00283957	0.0228766	3176	3274	3337	4135	5223	4774	3499.85	3412.46	3461.39	4092.03	4335.78	4923.55
RLTA1_RS30860	199.373	0.659942	0.22112	2.98454	0.00284003	0.0228766	273	182	233	169	155	163	300.837	189.697	241.685	167.244	128.671	168.106
RLTA1_RS06180	367.551	-0.494631	0.165843	-2.98253	0.00285876	0.02297	270	267	327	402	480	479	297.531	278.292	339.189	397.822	398.464	494.005
RLTA1_RS29155	300.302	0.478217	0.160329	2.98272	0.00285696	0.02297	293	342	356	289	287	222	322.877	356.464	369.27	285.997	238.248	228.954
RLTA1_RS17145	1442.2	-0.520576	0.174588	-2.98173	0.00286621	0.022996	1098	990	1266	1497	2451	1534	1209.96	1031.87	1313.19	1481.44	2034.66	1582.05
RLTA1_RS21435	1235.84	-0.592625	0.198773	-2.98142	0.00286914	0.022996	919	882	988	1846	1848	1064	1012.71	919.301	1024.83	1826.82	1534.09	1097.33
RLTA1_RS00685	340.049	-0.6421	0.215539	-2.97904	0.0028915	0.0230187	266	214	271	477	561	296	293.123	223.05	281.102	472.043	465.705	305.272
RLTA1_RS04685	1769.25	-1.02847	0.345346	-2.97808	0.00290057	0.0230187	1162	923	1205	2947	3840	988	1280.49	962.035	1249.92	2916.37	3187.71	1018.95
RLTA1_RS05505	1090.63	0.468467	0.157305	2.97808	0.00290058	0.0230187	1080	1245	1264	1042	1155	732	1190.13	1297.65	1311.12	1031.17	958.804	754.93
RLTA1_RS08440	557.033	-0.397765	0.133461	-2.98037	0.00287896	0.0230187	454	439	467	588	774	655	500.293	457.566	484.407	581.889	642.523	675.518
RLTA1_RS11765	370.884	-0.438356	0.147116	-2.97967	0.00288563	0.0230187	286	325	281	413	560	394	315.163	338.745	291.474	408.708	464.875	406.342
RLTA1_RS18225	199.07	-0.60666	0.20366	-2.97879	0.00289392	0.0230187	130	134	184	235	337	202	143.256	139.667	190.859	232.558	279.755	208.328
RLTA1_RS23355	12024.1	-0.322917	0.108361	-2.98002	0.00288229	0.0230187	9529	9691	11039	13794	16030	12736	10500.7	10100.9	11450.5	13650.6	13307	13135
RLTA1_RS34395	879.959	0.464773	0.156011	2.9791	0.00289094	0.0230187	1029	952	901	757	773	803	1133.92	992.262	934.585	749.133	641.693	828.155
RLTA1_RS18115	6764.28	0.584215	0.196207	2.97755	0.00290567	0.0230306	9073	6051	7752	5413	5724	5945	9998.15	6306.91	8040.96	5356.75	4751.68	6131.23
RLTA1_RS28945	4205.01	0.304591	0.102312	2.97708	0.00291004	0.0230369	4343	4459	4346	3835	4373	3746	4785.85	4647.58	4508	3795.14	3630.17	3863.35
RLTA1_RS26800	2322.84	0.379563	0.127525	2.97637	0.00291679	0.023062	2465	2519	2446	2033	2193	2158	2716.35	2625.53	2537.17	2011.87	1820.48	2225.6
RLTA1_RS19515	10965.4	-0.750563	0.252211	-2.97593	0.00292099	0.0230669	9094	5736	8221	17603	17035	9409	10021.3	5978.59	8527.44	17420.1	14141.3	9703.74
RLTA1_RS19235	1323.71	0.384982	0.129437	2.97428	0.00293678	0.0231632	1225	1480	1547	1211	1305	1128	1349.91	1542.59	1604.66	1198.41	1083.32	1163.34
RLTA1_RS01355	279.412	-0.477307	0.160673	-2.97067	0.00297148	0.0234081	221	213	227	368	391	278	243.535	222.008	235.461	364.176	324.582	286.709
RLTA1_RS24005	611.05	0.392086	0.132013	2.97005	0.00297752	0.023427	579	724	663	527	625	529	638.039	754.619	687.713	521.523	518.833	545.571
RLTA1_RS22035	190.474	-0.515306	0.173575	-2.96879	0.00298978	0.0234947	135	167	142	212	257	242	148.766	174.063	147.293	209.797	213.344	249.581
RLTA1_RS18210	689.441	0.421148	0.141941	2.96707	0.00300653	0.0235976	789	724	717	650	654	565	869.453	754.619	743.726	643.245	542.907	582.699
RLTA1_RS09780	909.022	-0.41314	0.139377	-2.96419	0.00303476	0.0237902	675	753	782	960	1412	962	743.828	784.846	811.149	950.023	1172.15	992.135
RLTA1_RS07690	16349.8	-0.529548	0.178717	-2.96304	0.00304613	0.0238234	13270	11098	13456	17551	28468	16435	14623.1	11567.4	13957.6	17368.6	23632.2	16949.8
RLTA1_RS20260	3197.68	-0.86664	0.292486	-2.96302	0.00304641	0.0238234	2199	1735	2472	4977	6288	2177	2423.23	1808.38	2564.14	4925.28	5219.88	2245.2
RLTA1_RS02220	60765.5	0.487778	0.164704	2.96154	0.00306102	0.0239086	68648	61362	70588	56690	66009	39630	75647.9	63957.1	73219.2	56100.8	54796.3	40871.4
RLTA1_RS31955	801.025	0.355464	0.120115	2.95937	0.00308265	0.0240484	815	880	851	737	872	635	898.104	917.217	882.721	729.341	723.876	654.892
RLTA1_RS07155	1332.77	-0.540993	0.183222	-2.95266	0.0031505	0.0245479	1119	854	1094	1635	2164	1284	1233.1	890.117	1134.78	1618.01	1796.41	1324.22
RLTA1_RS03600	4399.17	0.413211	0.140039	2.95069	0.00317069	0.0246754	4209	4922	5115	3473	4323	4165	4638.18	5130.16	5305.66	3436.91	3588.67	4295.47
RLTA1_RS08170	1903.99	-0.702985	0.23845	-2.94814	0.00319687	0.0247975	1463	1068	1564	2779	3246	1582	1612.18	1113.17	1622.3	2750.12	2694.61	1631.56
RLTA1_RS10440	3401.22	0.354497	0.120248	2.94804	0.00319794	0.0247975	3618	3325	3855	3137	3609	2769	3986.92	3465.62	3998.69	3104.4	2995.95	2855.74
RLTA1_RS25250	2083.05	0.318872	0.108156	2.94827	0.00319563	0.0247975	2110	2174	2262	1930	2291	1696	2325.15	2265.94	2346.32	1909.94	1901.83	1749.13
RLTA1_RS19855	10453	-0.309087	0.10487	-2.94733	0.0032053	0.0248247	8870	8461	9081	12029	13728	11059	9774.45	8818.83	9419.49	11904	11396.1	11405.4
RLTA1_RS07755	3942.9	-0.405146	0.137551	-2.94543	0.00322509	0.0249368	3346	2774	3471	4555	5447	4314	3687.18	2891.32	3600.38	4507.66	4521.73	4449.14
RLTA1_RS15680	5295.97	0.827582	0.280994	2.94519	0.00322752	0.0249368	5807	6905	6485	3980	2578	5211	6399.13	7197.03	6726.73	3938.64	2140.08	5374.24
RLTA1_RS00105	1565.19	0.457499	0.155399	2.94403	0.00323973	0.0250001	1645	1752	1731	1521	1650	1049	1812.74	1826.1	1795.52	1505.19	1369.72	1081.86
RLTA1_RS01955	10446	0.534208	0.181477	2.94367	0.00324348	0.0250001	12149	9924	12864	9780	10904	6662	13387.8	10343.7	13343.5	9678.36	9051.77	6870.69
RLTA1_RS16200	795.963	0.389182	0.132314	2.94136	0.0032677	0.0251566	761	913	884	711	761	711	838.598	951.612	916.951	703.611	631.731	733.273
RLTA1_RS19615	620.9	-0.410874	0.139931	-2.93626	0.00332196	0.0255438	467	490	553	655	844	754	514.619	510.723	573.613	648.193	700.632	777.62
RLTA1_RS08555	5500.23	0.357645	0.121824	2.93575	0.00332742	0.0255552	5266	5854	6392	5216	5402	4674	5802.96	6101.58	6630.26	5161.79	4484.38	4820.42
RLTA1_RS22690	1600.09	-0.663795	0.226157	-2.9351	0.00333437	0.0255781	1212	1130	1159	2267	2825	1257	1335.58	1177.79	1202.2	2243.44	2345.13	1296.38
RLTA1_RS30660	452.619	0.485671	0.165509	2.9344	0.00334192	0.0256055	528	505	459	442	431	326	581.839	526.357	476.109	437.407	357.787	336.212
RLTA1_RS25720	630.472	0.514463	0.175376	2.93348	0.00335183	0.0256509	617	864	621	527	573	544	679.914	900.54	644.148	521.523	475.666	561.041
RLTA1_RS23645	5033.46	0.364894	0.124516	2.9305	0.00338414	0.0258673	5363	5233	5433	4944	5018	4017	5909.85	5454.31	5635.51	4892.62	4165.61	4142.84
RLTA1_RS16020	1646.15	-0.39381	0.134421	-2.92967	0.00339317	0.0259056	1411	1241	1369	1836	2120	1970	1554.88	1293.48	1420.03	1816.92	1759.88	2031.71
RLTA1_RS00240	5809.11	-0.52206	0.178239	-2.92899	0.00340071	0.0259324	4776	3867	4835	7433	9214	5373	5263	4030.54	5015.22	7355.75	7648.85	5541.31
RLTA1_RS00865	465.127	0.564243	0.192794	2.92666	0.00342622	0.0260949	406	581	589	382	379	421	447.399	605.572	610.955	378.03	314.62	434.188
RLTA1_RS18325	1922.25	0.398983	0.136344	2.92631	0.00343013	0.0260949	1973	2150	2066	1841	1729	1666	2174.18	2240.93	2143.01	1821.87	1435.3	1718.19
RLTA1_RS33605	3049.1	0.578533	0.197741	2.92571	0.00343667	0.0261138	3554	3070	3704	2414	3685	1831	3916.39	3199.84	3842.07	2388.91	3059.04	1888.36
RLTA1_RS20475	314.132	0.418168	0.142948	2.92531	0.00344109	0.0261166	322	344	352	279	343	238	354.834	358.548	365.121	276.1	284.736	245.456
RLTA1_RS25085	729.877	0.581032	0.19878	2.923	0.00346682	0.0262808	819	848	808	771	622	461	902.512	883.863	838.118	762.987	516.343	475.441
RLTA1_RS07800	9982.08	-0.350675	0.120069	-2.92062	0.00349339	0.0264512	8673	7675	8453	11507	13767	10425	9557.37	7999.59	8768.09	11387.4	11428.4	10751.6
RLTA1_RS28950	1246.63	-0.458177	0.156911	-2.91997	0.00350065	0.026475	1029	898	1043	1435	1986	1221	1133.92	935.978	1081.88	1420.09	1648.64	1259.25
RLTA1_RS23325	7386.12	-0.502657	0.172192	-2.91917	0.0035097	0.0265122	5807	5426	6056	7610	9329	10380	6399.13	5655.48	6281.74	7530.91	7744.31	10705.2
RLTA1_RS05340	4122.76	-0.786856	0.269734	-2.91715	0.0035324	0.0266525	3216	2130	3194	6065	7678	3184	3543.93	2220.08	3313.06	6001.97	6373.76	3283.74
RLTA1_RS11635	634.756	-0.506385	0.173747	-2.91449	0.00356265	0.0268492	434	471	583	683	1054	663	478.254	490.919	604.731	675.902	874.96	683.769
RLTA1_RS11820	1212.37	-0.437887	0.150268	-2.91404	0.00356787	0.0268571	860	910	1150	1309	1671	1457	947.692	948.486	1192.87	1295.4	1387.15	1502.64
RLTA1_RS01845	533.004	-0.40355	0.138616	-2.91128	0.00359957	0.0270573	383	482	436	575	747	613	422.054	502.385	452.252	569.024	620.109	632.203
RLTA1_RS07385	20358.8	0.404977	0.13912	2.91099	0.00360287	0.0270573	21359	20931	23368	20046	18525	16818	23536.9	21816.2	24239	19837.7	15378.2	17344.8
RLTA1_RS25490	1035.88	0.421364	0.144808	2.90981	0.0036165	0.027128	973	1206	1185	785	1133	911	1072.21	1257	1229.17	776.842	940.541	939.538
RLTA1_RS19280	1439.24	0.528177	0.18158	2.90879	0.00362833	0.0271851	1208	1939	1684	1111	1384	1249	1331.18	2021	1746.77	1099.45	1148.9	1288.13
RLTA1_RS20180	1952.25	-0.833158	0.286688	-2.90615	0.00365911	0.0273838	919	1345	1732	1561	3867	2664	1012.71	1401.88	1796.56	1544.78	3210.12	2747.45
RLTA1_RS11265	9283.7	0.466719	0.160706	2.90419	0.00368209	0.0275238	8990	10060	11497	8660	10111	6226	9906.69	10485.5	11925.6	8570	8393.48	6421.03
RLTA1_RS27335	1558.58	0.474806	0.163635	2.90161	0.0037125	0.0277189	1631	1654	1849	1388	1791	1020	1797.31	1723.95	1917.92	1373.58	1486.77	1051.95
RLTA1_RS18815	2768.41	-0.767421	0.264524	-2.90113	0.00371814	0.0277288	2179	1565	2039	4345	4844	2077	2401.19	1631.19	2115	4299.84	4021.16	2142.06
RLTA1_RS23830	1610.45	-0.398723	0.137619	-2.8973	0.00376394	0.0280379	1157	1289	1494	1739	2394	1732	1274.98	1343.51	1549.69	1720.93	1987.34	1786.26
RLTA1_RS17565	7137.48	-0.911375	0.314874	-2.89441	0.00379867	0.0282639	4270	5138	4632	15163	9203	5153	4705.4	5355.3	4804.66	15005.4	7639.71	5314.42
RLTA1_RS33440	4292.19	0.374775	0.129535	2.89324	0.00381286	0.0283367	4629	4496	4581	4089	3983	3744	5101.01	4686.14	4751.76	4046.51	3306.42	3861.28
RLTA1_RS13765	963.266	-0.33915	0.117278	-2.89184	0.00382989	0.0284304	800	784	822	1095	1233	1087	881.574	817.157	852.64	1083.62	1023.55	1121.05
RLTA1_RS22275	11887.4	-0.737599	0.255141	-2.89094	0.00384091	0.0284466	8957	7088	9141	18231	20950	8874	9870.33	7387.76	9481.73	18041.5	17391.3	9151.98
RLTA1_RS24135	831.438	0.353202	0.122165	2.89119	0.0038379	0.0284466	893	826	919	748	876	701	984.057	860.933	953.256	740.226	727.197	722.959
RLTA1_RS32275	8927.98	0.415764	0.1439	2.88926	0.00386147	0.028566	10127	8976	9739	8576	9353	6496	11159.6	9355.61	10102	8486.87	7764.23	6699.49
RLTA1_RS14465	5144.48	-0.314973	0.109057	-2.88815	0.00387514	0.0286342	4448	4147	4369	5788	6969	5428	4901.55	4322.38	4531.85	5727.85	5785.2	5598.04
RLTA1_RS18105	2536.06	-0.558401	0.193403	-2.88724	0.00388641	0.0286845	2324	1527	1930	3108	3935	2637	2560.97	1591.58	2001.94	3075.7	3266.57	2719.61
RLTA1_RS29465	3966.34	0.668713	0.231744	2.88557	0.0039071	0.0288042	4716	3804	5251	4070	3547	2150	5196.88	3964.88	5446.73	4027.7	2944.48	2217.35
RLTA1_RS23905	3504.45	0.30909	0.107179	2.88388	0.00392811	0.028926	3465	3804	3713	3104	3612	3221	3818.32	3964.88	3851.4	3071.74	2998.44	3321.9
RLTA1_RS35810	2180.39	0.343198	0.119067	2.8824	0.00394653	0.0290284	2102	2465	2343	2020	2399	1722	2316.34	2569.25	2430.34	1999.01	1991.49	1775.94
RLTA1_RS19700	2943.56	-0.441526	0.153332	-2.87954	0.0039825	0.0292596	2457	2123	2478	3383	4636	2884	2707.53	2212.79	2570.37	3347.84	3848.5	2974.34
RLTA1_RS22280	8880.51	-0.777084	0.269938	-2.87875	0.00399251	0.0292816	6467	5509	6524	13178	17108	6210	7126.43	5741.99	6767.18	13041	14201.9	6404.53
RLTA1_RS31425	255.334	-0.831445	0.288838	-2.87859	0.00399461	0.0292816	161	181	179	287	589	201	177.417	188.655	185.672	284.017	488.948	207.296
RLTA1_RS23240	680.097	0.401422	0.13963	2.87491	0.00404148	0.0295915	759	741	688	541	709	615	836.394	772.338	713.645	535.378	588.564	634.265
RLTA1_RS21650	6961.89	-0.680625	0.236874	-2.87336	0.00406128	0.0297027	5517	4371	5219	10006	12288	5449	6079.56	4555.86	5413.54	9902.01	10200.7	5619.69
RLTA1_RS05510	900.895	0.570155	0.198758	2.86859	0.00412306	0.0301203	948	1291	809	755	772	764	1044.67	1345.6	839.155	747.154	640.863	787.933
RLTA1_RS18775	960.439	0.406271	0.141716	2.86681	0.00414635	0.0302562	882	1174	1049	844	934	842	971.936	1223.65	1088.1	835.229	775.344	868.376
RLTA1_RS12855	2288.39	0.954969	0.333214	2.86593	0.00415789	0.0303059	2059	3588	2940	1977	2378	719	2268.95	3739.74	3049.59	1956.45	1974.06	741.523
RLTA1_RS15610	1264.66	-0.361903	0.126346	-2.86438	0.00417821	0.0304196	989	1050	1095	1354	1630	1527	1089.85	1094.41	1135.82	1339.93	1353.12	1574.83
RLTA1_RS14590	2649.75	0.463686	0.161933	2.86344	0.00419073	0.0304764	2720	2992	2989	2574	2833	1729	2997.35	3118.54	3100.41	2547.25	2351.77	1783.16
RLTA1_RS20670	201.298	-0.760114	0.265677	-2.86104	0.00422248	0.0306726	105	159	161	320	332	162	115.707	165.724	167.001	316.674	275.604	167.075
RLTA1_RS02380	1104.9	-0.429019	0.150006	-2.86002	0.0042362	0.0307375	924	809	930	1131	1699	1235	1018.22	843.214	964.666	1119.25	1410.4	1273.69
RLTA1_RS00830	1023.6	0.339861	0.118848	2.85963	0.00424132	0.03074	1002	1148	1090	879	1156	854	1104.17	1196.55	1130.63	869.865	959.634	880.752
RLTA1_RS33510	1639.46	0.495695	0.173461	2.85767	0.00426759	0.0308956	1577	2073	1789	1307	1397	1580	1737.8	2160.67	1855.68	1293.42	1159.7	1629.49
RLTA1_RS23500	5261.19	0.358012	0.125335	2.85644	0.00428418	0.0309809	4831	6179	5753	4580	5368	4700	5323.61	6440.32	5967.44	4532.4	4456.15	4847.23
RLTA1_RS22065	1078.47	-0.385536	0.135051	-2.85475	0.00430702	0.0311111	905	901	838	1133	1447	1302	997.281	939.105	869.236	1121.23	1201.2	1342.79
RLTA1_RS02265	291.268	0.529265	0.185485	2.85341	0.00432529	0.031208	301	306	368	288	281	191	331.692	318.941	381.717	285.007	233.267	196.983
RLTA1_RS05475	651.948	0.569126	0.19959	2.85147	0.00435173	0.0313636	577	881	754	448	601	614	635.835	918.259	782.105	443.344	498.91	633.234
RLTA1_RS33705	985.842	-0.363505	0.127525	-2.85046	0.00436561	0.0314285	747	799	897	1082	1285	1155	823.17	832.791	930.436	1070.76	1066.72	1191.18
RLTA1_RS00880	702.432	0.495648	0.173961	2.84919	0.00438309	0.0314839	668	858	806	620	799	457	736.114	894.286	836.044	613.557	663.276	471.316
RLTA1_RS16960	1093.71	0.577006	0.202495	2.84949	0.00437898	0.0314839	960	1370	1391	684	1152	970	1057.89	1427.94	1442.85	676.892	956.313	1000.39
RLTA1_RS08775	1662.75	0.343704	0.12065	2.84878	0.00438877	0.0314895	1725	1885	1653	1464	1856	1364	1900.89	1964.72	1714.62	1448.79	1540.73	1406.73
RLTA1_RS00655	841.798	-0.36106	0.126925	-2.84468	0.00444564	0.0318266	631	731	726	955	1062	983	695.342	761.915	753.062	945.075	881.601	1013.79
RLTA1_RS12235	326.967	0.447178	0.157191	2.84481	0.00444386	0.0318266	305	404	361	299	333	250	336.1	421.086	374.456	295.893	276.434	257.831
RLTA1_RS02660	1219.84	-0.415982	0.146345	-2.84248	0.00447645	0.0319205	1078	888	986	1433	1780	1248	1187.92	925.555	1022.75	1418.11	1477.64	1287.09
RLTA1_RS21240	591.616	-0.338552	0.119111	-2.84232	0.00447859	0.0319205	477	514	488	672	794	638	525.639	535.738	506.19	665.016	659.126	657.986
RLTA1_RS25480	1719.77	-0.481817	0.169483	-2.84287	0.00447098	0.0319205	1235	1276	1557	1652	2702	2070	1360.93	1329.96	1615.04	1634.83	2243.02	2134.84
RLTA1_RS32720	1484.7	-0.541405	0.190418	-2.84324	0.00446573	0.0319205	1008	1065	1357	1426	2547	1701	1110.78	1110.04	1407.58	1411.18	2114.35	1754.29
RLTA1_RS05800	673.308	0.357233	0.125871	2.83808	0.00453858	0.0322766	678	695	768	618	667	588	747.134	724.393	796.627	611.577	553.699	606.42
RLTA1_RS10825	906.605	0.396168	0.139584	2.83822	0.00453665	0.0322766	929	1071	917	856	960	683	1023.73	1116.29	951.181	847.104	796.928	704.395
RLTA1_RS26515	391.783	0.473029	0.166728	2.83713	0.00455209	0.032337	474	423	389	363	401	283	522.333	440.889	403.5	359.228	332.883	291.865
RLTA1_RS31315	774.751	0.769548	0.271398	2.8355	0.00457541	0.0324667	618	1029	1134	771	668	389	681.016	1072.52	1176.27	762.987	554.529	401.186
RLTA1_RS29145	796.771	-0.474227	0.167289	-2.83478	0.00458568	0.0325038	631	637	619	1075	1167	724	695.342	663.94	642.073	1063.83	968.765	746.68
RLTA1_RS19580	5029	-0.587224	0.207344	-2.83212	0.00462403	0.0327036	4154	3100	4097	7624	6865	4724	4577.57	3231.1	4249.72	7544.77	5698.86	4871.98
RLTA1_RS29920	1039.51	0.394175	0.139163	2.83247	0.00461899	0.0327036	1151	1072	1115	1003	1084	778	1268.36	1117.34	1156.56	992.576	899.864	802.371
RLTA1_RS23110	128.053	0.577972	0.204171	2.83082	0.00464294	0.0328012	140	164	130	87	126	114	154.275	170.936	134.846	86.0959	104.597	117.571
RLTA1_RS11460	459.135	-0.609636	0.215418	-2.83001	0.00465463	0.0328478	356	276	396	693	643	431	392.301	287.673	410.761	685.798	533.776	444.501
RLTA1_RS25995	108.862	-0.660522	0.233473	-2.82911	0.00466772	0.0329041	81	61	97	127	186	116	89.2594	63.5798	100.616	125.68	154.405	119.634
RLTA1_RS11735	334.881	-0.397352	0.140644	-2.82522	0.00472478	0.0332497	256	269	294	386	483	348	282.104	280.377	304.959	381.988	400.954	358.901
RLTA1_RS30700	1329.41	0.430293	0.152313	2.82507	0.00472708	0.0332497	1428	1488	1401	1305	1147	1120	1573.61	1550.93	1453.22	1291.44	952.163	1155.08
RLTA1_RS14190	35003.7	0.867746	0.307475	2.82217	0.00477006	0.0335154	42225	47399	38311	35190	32597	12086	46530.6	49403.6	39739	34824.3	27059.8	12464.6
RLTA1_RS20440	1195.15	-0.359768	0.12758	-2.81993	0.00480344	0.0337131	984	981	997	1476	1629	1180	1084.34	1022.49	1034.16	1460.66	1352.29	1216.96
RLTA1_RS20970	753.518	-0.549889	0.195091	-2.81863	0.00482296	0.0337764	680	535	509	1075	948	810	749.338	557.626	527.973	1063.83	786.966	835.374
RLTA1_RS29875	480.381	0.435879	0.154641	2.81866	0.00482251	0.0337764	424	591	553	414	482	403	467.234	615.994	573.613	409.697	400.124	415.624
RLTA1_RS07600	1421.29	0.432148	0.153382	2.81746	0.00484053	0.0338259	1430	1812	1382	1300	1491	1072	1575.81	1888.63	1433.51	1286.49	1237.73	1105.58
RLTA1_RS10000	142.352	-0.55682	0.197609	-2.81779	0.0048355	0.0338259	102	128	96	160	191	186	112.401	133.413	99.5784	158.337	158.555	191.827
RLTA1_RS26665	597.226	0.382196	0.135689	2.81671	0.00485179	0.0338678	643	666	603	484	669	505	708.565	694.166	625.477	478.97	555.359	520.819
RLTA1_RS14095	611.556	0.451151	0.160336	2.81378	0.00489625	0.0341411	576	798	629	492	614	537	634.733	831.749	652.446	486.887	509.702	553.822
RLTA1_RS32670	922.593	-0.644197	0.229168	-2.81103	0.00493836	0.0343975	814	642	573	1283	1551	793	897.002	669.151	594.359	1269.67	1287.54	817.841
RLTA1_RS32070	2151.22	0.284279	0.10117	2.80993	0.00495525	0.0344778	2194	2241	2250	1972	2307	1894	2417.72	2335.78	2333.87	1951.51	1915.12	1953.33
RLTA1_RS00905	807.874	-0.389487	0.138649	-2.80916	0.00496714	0.0345232	625	640	716	820	1146	956	688.73	667.067	742.689	811.478	951.332	985.947
RLTA1_RS22015	244.25	0.573074	0.204052	2.80847	0.00497772	0.0345427	231	356	242	190	258	181	254.555	371.056	251.021	188.025	214.174	186.67
RLTA1_RS30030	792.971	0.346834	0.123504	2.80828	0.00498068	0.0345427	769	918	828	705	817	697	847.413	956.824	858.864	697.673	678.219	718.834
RLTA1_RS10880	3425.79	-0.360693	0.128552	-2.80582	0.00501888	0.0347702	2844	2584	3058	4186	4481	3581	3134	2693.28	3171.99	4142.5	3719.83	3693.18
RLTA1_RS17800	391.778	0.552231	0.197121	2.80148	0.00508694	0.0352028	380	550	391	369	379	265	418.748	573.261	405.575	365.165	314.62	273.301
RLTA1_RS29670	314.149	-0.47033	0.167907	-2.80114	0.00509226	0.0352028	251	221	273	327	437	396	276.594	230.346	283.176	323.602	362.768	408.405
RLTA1_RS00475	415.715	-0.566362	0.202222	-2.8007	0.00509917	0.0352127	315	278	356	449	753	406	347.12	289.757	369.27	444.334	625.09	418.718
RLTA1_RS02505	4272.88	-0.337005	0.120347	-2.80029	0.00510572	0.0352201	3380	3650	3663	5167	5915	4155	3724.65	3804.37	3799.54	5113.3	4910.24	4285.16
RLTA1_RS23335	794.803	-0.443741	0.158585	-2.79812	0.00514007	0.0354192	620	612	674	807	1047	1048	683.22	637.883	699.123	798.613	869.149	1080.83
RLTA1_RS23940	1005.59	-0.51166	0.182906	-2.79739	0.00515167	0.0354611	676	842	834	1351	1559	887	744.93	877.61	865.087	1336.96	1294.18	914.786
RLTA1_RS13410	5233.98	0.722969	0.258504	2.79674	0.00516212	0.0354951	5732	5898	6838	4278	6319	2296	6316.48	6147.44	7092.89	4233.54	5245.61	2367.92
RLTA1_RS22285	3680.42	-0.635201	0.227181	-2.79601	0.00517374	0.035537	2996	2255	2890	5342	6059	3022	3301.5	2350.37	2997.72	5286.48	5029.78	3116.67
RLTA1_RS12175	233.559	0.555422	0.198741	2.7947	0.00519473	0.0356432	280	214	291	186	199	212	308.551	223.05	301.847	184.067	165.196	218.641
RLTA1_RS24045	187.422	-0.467423	0.167459	-2.79127	0.00525016	0.0359851	145	151	149	204	250	236	159.785	157.386	154.554	201.88	207.533	243.393
RLTA1_RS06495	1311.7	-0.721777	0.258711	-2.7899	0.0052725	0.0360998	1038	794	964	1813	2515	986	1143.84	827.58	999.933	1794.16	2087.78	1016.89
RLTA1_RS11110	2098.24	0.365858	0.131166	2.78928	0.00528257	0.0361303	2065	2326	2302	1757	2042	2005	2275.56	2424.37	2387.81	1738.74	1695.13	2067.81
RLTA1_RS33585	578.295	0.39771	0.142621	2.78857	0.00529413	0.0361709	633	603	623	567	559	458	697.546	628.502	646.222	561.107	464.044	472.347
RLTA1_RS02540	900.352	-0.46178	0.165684	-2.78712	0.00531789	0.0362947	725	672	746	1105	1427	825	798.927	700.42	773.807	1093.52	1184.6	850.844
RLTA1_RS19585	1134.24	-0.459273	0.164807	-2.78674	0.00532417	0.0362966	868	851	985	1151	1481	1524	956.508	886.99	1021.72	1139.04	1229.43	1571.74
RLTA1_RS19590	1948.36	0.331329	0.118909	2.78642	0.00532945	0.0362966	2125	2040	1972	1666	2082	1745	2341.68	2126.28	2045.51	1648.69	1728.34	1799.66
RLTA1_RS02375	1617.06	-0.382398	0.137465	-2.78178	0.00540619	0.0367682	1401	1175	1392	1758	2295	1789	1543.86	1224.69	1443.89	1739.73	1905.16	1845.04
RLTA1_RS11720	10296.5	0.604495	0.217324	2.78154	0.00541012	0.0367682	12744	10943	11393	10331	6914	8289	14043.5	11405.8	11817.7	10223.6	5739.54	8548.66
RLTA1_RS16520	2444	-0.548556	0.197265	-2.78081	0.00542232	0.0367735	1796	1634	2191	3435	3724	2151	1979.13	1703.1	2272.67	3399.3	3091.42	2218.38
RLTA1_RS16660	2956.56	-0.403346	0.145043	-2.78087	0.00542135	0.0367735	2626	2090	2474	3383	4239	3136	2893.77	2178.39	2566.22	3347.84	3518.93	3234.24
RLTA1_RS20985	1517.6	0.345527	0.124274	2.78038	0.0054296	0.0367841	1499	1718	1593	1270	1557	1417	1651.85	1790.66	1652.38	1256.8	1292.52	1461.39
RLTA1_RS30620	832.699	0.5534	0.199201	2.7781	0.00546785	0.0370043	919	942	942	859	811	486	1012.71	981.839	977.113	850.073	673.238	501.224
RLTA1_RS07795	2899.09	-0.426961	0.153737	-2.77721	0.00548269	0.037022	2533	1992	2461	3288	4335	3027	2791.28	2076.25	2552.73	3253.83	3598.63	3121.82
RLTA1_RS22465	3165.97	-0.419348	0.151008	-2.777	0.00548639	0.037022	2554	2590	2520	3904	4830	2904	2814.43	2699.54	2613.93	3863.43	4009.54	2994.97
RLTA1_RS33740	1729.5	-0.40172	0.144664	-2.77692	0.00548773	0.037022	1400	1354	1463	2028	2660	1639	1542.75	1411.26	1517.53	2006.92	2208.15	1690.34
RLTA1_RS32175	735.281	0.366355	0.132012	2.77516	0.00551742	0.0371833	736	799	810	594	758	689	811.048	832.791	840.193	587.827	629.241	710.583
RLTA1_RS00340	2435.75	0.571802	0.206075	2.77472	0.00552485	0.0371945	2947	2692	2586	2006	1736	2378	3247.5	2805.85	2682.39	1985.15	1441.11	2452.49
RLTA1_RS22300	262.347	-0.598871	0.215866	-2.77428	0.00553244	0.0372067	213	199	177	269	331	395	234.719	207.416	183.598	266.204	274.774	407.374
RLTA1_RS16860	4970.81	-0.291255	0.105033	-2.77297	0.00555468	0.0373173	4276	4151	4217	5394	6788	5274	4712.01	4326.55	4374.19	5337.94	5634.94	5439.21
RLTA1_RS07825	10013.3	-0.411388	0.148406	-2.77204	0.00557058	0.037385	8712	7156	8414	11001	15292	10387	9600.34	7458.64	8727.63	10886.7	12694.4	10712.4
RLTA1_RS21370	619.412	-0.419613	0.151411	-2.77135	0.00558242	0.0374255	499	449	551	739	762	740	549.882	467.989	571.539	731.32	632.561	763.181
RLTA1_RS20875	13560.4	-0.394707	0.142445	-2.77094	0.00558939	0.0374332	10967	10186	12001	13816	18331	16796	12085.3	10616.8	12448.3	13672.4	15217.2	17322.1
RLTA1_RS23300	1424.95	-0.373078	0.134679	-2.77013	0.0056034	0.037488	1116	1256	1143	1770	1716	1599	1229.8	1309.12	1185.61	1751.61	1424.51	1649.09
RLTA1_RS14520	4108.2	-0.761067	0.274835	-2.76918	0.00561979	0.0375461	3502	2154	2934	6505	6977	3173	3859.09	2245.1	3043.36	6437.4	5791.84	3272.4
RLTA1_RS15300	1698.79	-0.367055	0.132561	-2.76895	0.00562375	0.0375461	1181	1509	1520	1944	2209	1924	1301.42	1572.82	1576.66	1923.8	1833.76	1984.27
RLTA1_RS08140	1353.91	-0.482898	0.174518	-2.76704	0.00565676	0.0376883	1189	912	1087	1392	1873	1748	1310.24	950.57	1127.52	1377.53	1554.84	1802.76
RLTA1_RS14310	200.832	-0.57824	0.208974	-2.76705	0.00565665	0.0376883	172	134	149	281	304	185	189.538	139.667	154.554	278.08	252.36	190.795
RLTA1_RS34770	178.623	0.502321	0.181632	2.76559	0.00568199	0.0378173	213	190	188	155	155	157	234.719	198.035	195.008	153.389	128.671	161.918
RLTA1_RS04940	2534.83	-0.401484	0.14521	-2.76484	0.00569502	0.0378648	1944	2003	2240	3240	3600	2386	2142.23	2087.71	2323.5	3206.33	2988.48	2460.74
RLTA1_RS35765	8917.13	0.303826	0.109947	2.76339	0.00572037	0.0379941	9468	9618	8773	8068	9690	7676	10433.4	10024.8	9100.01	7984.15	8043.99	7916.46
RLTA1_RS01165	586.582	-0.436121	0.15809	-2.75869	0.00580341	0.0384267	510	418	480	735	727	672	562.004	435.678	497.892	727.362	603.507	693.051
RLTA1_RS14775	154.959	-0.708825	0.256931	-2.75881	0.00580115	0.0384267	117	108	108	197	304	125	128.93	112.568	112.026	194.953	252.36	128.916
RLTA1_RS23440	1676.02	-0.403374	0.146199	-2.75908	0.00579641	0.0384267	1239	1490	1360	1779	2127	2134	1365.34	1553.01	1410.69	1760.51	1765.69	2200.85
RLTA1_RS05805	648.927	-0.481373	0.17452	-2.75826	0.00581093	0.0384369	439	565	533	703	1094	644	483.764	588.895	552.868	695.694	908.166	664.174
RLTA1_RS20975	5178.49	0.338212	0.122733	2.75568	0.00585706	0.0387023	5224	5163	5987	4962	5456	4153	5756.68	5381.35	6210.17	4910.43	4529.21	4283.1
RLTA1_RS10675	1372.87	0.309479	0.11241	2.75314	0.00590264	0.0389635	1380	1512	1410	1204	1548	1165	1520.72	1575.95	1462.56	1191.49	1285.05	1201.49
RLTA1_RS16375	579.138	-0.812097	0.295194	-2.75106	0.00594025	0.0391716	458	352	376	670	1322	439	504.701	366.887	390.015	663.037	1097.44	452.752
RLTA1_RS02925	12103	-0.675434	0.24566	-2.74946	0.00596932	0.039323	10805	6613	8833	18800	18053	10729	11906.8	6892.68	9162.25	18604.6	14986.4	11065.1
RLTA1_RS20685	1349.18	0.385658	0.140308	2.74865	0.00598416	0.0393804	1380	1594	1353	1293	1424	1016	1520.72	1661.41	1403.43	1279.56	1182.11	1047.83
RLTA1_RS30290	2192.01	0.429865	0.156412	2.74828	0.00599085	0.0393842	2369	2405	2343	2158	1848	1876	2610.56	2506.71	2430.34	2135.57	1534.09	1934.77
RLTA1_RS07635	2571.49	-0.376442	0.13712	-2.74534	0.00604477	0.039686	1839	2254	2254	2630	3810	2860	2026.52	2349.33	2338.02	2602.67	3162.81	2949.59
RLTA1_RS23910	894.258	0.442277	0.161115	2.74511	0.00604909	0.039686	955	1018	943	832	1007	596	1052.38	1061.05	978.15	823.353	835.944	614.67
RLTA1_RS05785	1234.25	0.426546	0.155459	2.74378	0.00607359	0.0398062	1190	1480	1343	1067	1447	874	1311.34	1542.59	1393.06	1055.91	1201.2	901.379
RLTA1_RS08150	831.365	0.424343	0.154746	2.74219	0.00610319	0.0398783	837	977	884	644	795	808	922.347	1018.32	916.951	637.307	659.956	833.311
RLTA1_RS11830	673.785	0.359618	0.131124	2.74257	0.00609608	0.0398783	652	734	760	546	722	612	718.483	765.042	788.329	540.326	599.356	631.171
RLTA1_RS21395	841.16	-0.425639	0.155201	-2.7425	0.00609733	0.0398783	689	645	696	895	1057	1096	759.256	672.278	721.943	885.699	877.451	1130.33
RLTA1_RS34905	174.371	0.450652	0.164431	2.74068	0.00613118	0.0400206	181	183	206	156	168	144	199.456	190.739	213.679	154.379	139.462	148.511
RLTA1_RS08670	2171.23	-0.723342	0.264422	-2.73557	0.00622733	0.040607	1557	1444	1633	2918	4371	1548	1715.76	1505.07	1693.87	2887.67	3628.51	1596.49
RLTA1_RS17155	2354.24	-0.411464	0.150503	-2.73393	0.00625833	0.0407679	1857	1683	2181	2713	3545	2361	2046.35	1754.18	2262.3	2684.81	2942.82	2434.96
RLTA1_RS25150	231.767	-0.410474	0.150184	-2.73314	0.00627332	0.0408242	189	178	196	271	316	255	208.272	185.528	203.306	268.184	262.322	262.988
RLTA1_RS15560	146.899	0.668743	0.244824	2.73153	0.00630415	0.0409834	117	227	169	105	136	120	128.93	236.6	175.299	103.909	112.898	123.759
RLTA1_RS17070	1411	-0.385138	0.141056	-2.73039	0.00632587	0.0410831	1200	1127	1133	1532	2178	1425	1322.36	1174.66	1175.23	1516.08	1808.03	1469.64
RLTA1_RS23315	624.079	-0.495265	0.181414	-2.73003	0.00633289	0.0410872	404	546	520	610	882	829	445.195	569.091	539.383	603.661	732.177	854.969
RLTA1_RS04735	229.285	-0.417579	0.153011	-2.72908	0.00635104	0.0411635	189	181	185	269	298	265	208.272	188.655	191.896	266.204	247.38	273.301
RLTA1_RS18320	4023.76	0.306674	0.112499	2.72601	0.00641045	0.0415067	4017	4305	4277	3777	4524	3199	4426.6	4487.07	4436.43	3737.75	3755.52	3299.21
RLTA1_RS18245	493.309	0.364633	0.133801	2.72519	0.00642642	0.0415683	490	542	541	471	520	384	539.964	564.922	561.166	466.105	431.669	396.029
RLTA1_RS15815	280.795	0.439507	0.161348	2.72397	0.00645032	0.041681	287	352	276	241	275	241	316.265	366.887	286.288	238.495	228.287	248.549
RLTA1_RS28855	1596.46	-0.323059	0.118675	-2.72221	0.00648476	0.0417945	1257	1340	1421	1671	2292	1713	1385.17	1396.67	1473.97	1653.63	1902.66	1766.66
RLTA1_RS34540	1373.24	0.29392	0.107959	2.72252	0.00647861	0.0417945	1351	1460	1472	1261	1427	1231	1488.76	1521.75	1526.87	1247.9	1184.6	1269.56
RLTA1_RS35925	117.51	-0.761767	0.279848	-2.72207	0.00648737	0.0417945	71	106	70	108	166	193	78.2397	110.483	72.6092	106.878	137.802	199.046
RLTA1_RS01800	8898.74	0.483078	0.177562	2.72061	0.00651619	0.0418963	9842	9115	10391	9307	8288	5990	10845.6	9500.49	10778.3	9210.28	6880.14	6177.64
RLTA1_RS22055	1292.14	-0.356761	0.131131	-2.72065	0.00651541	0.0418963	983	1110	1117	1409	1616	1569	1083.23	1156.94	1158.64	1394.36	1341.49	1618.15
RLTA1_RS11740	800.689	0.382024	0.140492	2.71919	0.0065442	0.0420344	751	982	836	666	864	688	827.578	1023.53	867.162	659.079	717.235	709.552
RLTA1_RS28080	1151.63	0.3564	0.131351	2.71335	0.00666068	0.0427399	1223	1188	1248	1007	1343	890	1347.71	1238.24	1294.52	996.535	1114.87	917.88
RLTA1_RS16330	2020.16	-0.377244	0.139105	-2.71194	0.00668901	0.042879	1833	1517	1612	2258	2839	2188	2019.91	1581.16	1672.09	2234.53	2356.75	2256.54
RLTA1_RS10935	529.851	-0.537208	0.19822	-2.71016	0.00672517	0.0430678	466	345	409	741	766	497	513.517	359.591	424.245	733.299	635.882	512.569
RLTA1_RS28690	196.846	0.655946	0.24211	2.70929	0.00674277	0.0431377	242	184	254	194	133	152	266.676	191.782	263.468	191.984	110.408	156.762
RLTA1_RS34875	730.639	0.585452	0.216127	2.70883	0.00675209	0.0431544	662	958	871	561	898	438	729.503	998.516	903.466	555.17	745.459	451.721
RLTA1_RS11875	10665.6	-0.645886	0.238512	-2.70799	0.00676928	0.0432213	8751	6297	8431	16581	16402	8743	9643.32	6563.31	8745.27	16408.7	13615.8	9016.88
RLTA1_RS04215	2115.65	-0.464226	0.171522	-2.70652	0.00679934	0.0433702	1854	1372	1795	2221	3182	2443	2043.05	1430.02	1861.91	2197.92	2641.48	2519.53
RLTA1_RS28050	105.113	-0.712231	0.263392	-2.70407	0.00684957	0.0436042	71	81	74	90	205	128	78.2397	84.4256	76.7583	89.0647	170.177	132.01
RLTA1_RS35965	198.098	-0.465082	0.171982	-2.70426	0.00684575	0.0436042	151	149	171	211	266	252	166.397	155.301	177.374	208.807	220.815	259.894
RLTA1_RS06540	3178.26	-0.818518	0.303306	-2.69866	0.00696201	0.0440881	2342	1796	2360	4699	6519	2043	2580.81	1871.96	2447.97	4650.17	5411.64	2107
RLTA1_RS08675	10452.4	-0.908027	0.336343	-2.6997	0.00694017	0.0440881	6935	5771	7853	15633	23240	5962	7642.15	6015.07	8145.72	15470.5	19292.3	6148.76
RLTA1_RS09575	1380.66	-0.444894	0.164911	-2.69778	0.00698038	0.0440881	1144	1019	1143	1342	1923	1795	1260.65	1062.1	1185.61	1328.05	1596.35	1851.23
RLTA1_RS16265	5699.79	0.469714	0.17404	2.69889	0.00695718	0.0440881	6663	5528	6512	5688	5719	3843	7342.41	5761.79	6754.73	5628.89	4747.53	3963.38
RLTA1_RS18695	248.265	-0.4039	0.149643	-2.69909	0.00695298	0.0440881	191	202	212	275	328	295	210.476	210.543	219.902	272.142	272.284	304.241
RLTA1_RS18865	519.043	0.456006	0.169026	2.69784	0.00697907	0.0440881	440	631	635	449	552	398	484.866	657.686	658.67	444.334	458.233	410.468
RLTA1_RS23595	883.621	0.48463	0.179566	2.69889	0.00695709	0.0440881	1053	793	1065	832	781	716	1160.37	826.537	1104.7	823.353	648.334	738.429
RLTA1_RS29480	154.558	-0.524391	0.194342	-2.69829	0.00696966	0.0440881	102	131	127	168	257	162	112.401	136.54	131.734	166.254	213.344	167.075
RLTA1_RS29660	1003.96	-0.423999	0.157194	-2.6973	0.00699038	0.0441079	835	697	893	1225	1463	993	920.143	726.477	926.287	1212.27	1214.48	1024.11
RLTA1_RS15290	179.914	-0.540449	0.200402	-2.69683	0.00700028	0.0441272	129	122	164	196	233	245	142.154	127.16	170.113	193.963	193.421	252.675
RLTA1_RS01620	1504.44	0.325637	0.120901	2.69343	0.00707213	0.0445267	1583	1565	1586	1458	1593	1203	1744.42	1631.19	1645.12	1442.85	1322.4	1240.68
RLTA1_RS08330	221.818	0.484104	0.179752	2.69318	0.0070775	0.0445267	200	292	242	197	214	177	220.394	304.349	251.021	194.953	177.648	182.545
RLTA1_RS28750	198.778	0.61271	0.227569	2.69242	0.00709361	0.0445844	267	207	203	181	143	169	294.225	215.754	210.567	179.119	118.709	174.294
RLTA1_RS19705	367.614	0.443889	0.165011	2.69005	0.00714411	0.0448581	329	431	443	281	403	312	362.547	449.228	459.513	278.08	334.544	321.774
RLTA1_RS33130	536.707	-0.706375	0.262712	-2.68878	0.00717141	0.0449856	388	419	347	704	1072	397	427.564	436.72	359.934	696.684	889.903	409.436
RLTA1_RS11920	933.627	0.301404	0.112228	2.68563	0.00723922	0.0453667	958	981	978	867	1015	784	1055.69	1022.49	1014.45	857.99	842.585	808.559
RLTA1_RS12265	346.405	0.383618	0.142997	2.68271	0.00730281	0.0457207	378	375	356	326	356	275	416.544	390.859	369.27	322.612	295.527	283.615
RLTA1_RS22030	88811	0.445395	0.166045	2.68238	0.00731008	0.0457217	90974	107936	91090	89796	89525	60552	100250	112501	94485.4	88862.8	74317.7	62448.8
RLTA1_RS14920	5251.28	-0.897128	0.334649	-2.6808	0.00734454	0.0458506	3508	2409	4465	6967	12037	3503	3865.7	2510.88	4631.43	6894.6	9992.31	3612.73
RLTA1_RS32725	738.063	-0.514168	0.191797	-2.68079	0.00734493	0.0458506	485	542	698	731	1023	1001	534.454	564.922	724.018	723.403	849.226	1032.36
RLTA1_RS28145	1165.8	0.43392	0.161963	2.67914	0.00738123	0.0460325	1156	1241	1400	1167	1194	804	1273.87	1293.48	1452.18	1154.87	991.179	829.186
RLTA1_RS02330	3692.37	-0.313338	0.116974	-2.6787	0.00739096	0.0460486	3073	2920	3325	4375	4754	3878	3386.35	3043.49	3448.94	4329.53	3946.45	3999.48
RLTA1_RS00065	13200.5	-0.436107	0.162897	-2.6772	0.007424	0.0462098	11198	9663	10846	17323	19100	12162	12339.8	10071.7	11250.3	17143	15855.5	12543
RLTA1_RS33685	4117.47	0.45749	0.170998	2.67541	0.00746386	0.0464129	4514	4489	4475	4233	4137	2702	4974.28	4678.85	4641.81	4189.01	3434.26	2786.64
RLTA1_RS00100	1905.41	0.318814	0.119205	2.6745	0.00748417	0.0464943	1782	2176	2037	1768	1949	1668	1963.71	2268.03	2112.93	1749.63	1617.93	1720.25
RLTA1_RS01895	1098.73	-0.421682	0.157873	-2.67102	0.00756202	0.0469327	849	751	1060	1242	1527	1239	935.571	782.761	1099.51	1229.09	1267.61	1277.81
RLTA1_RS01205	400.951	0.378268	0.141657	2.6703	0.00757833	0.0469886	383	440	462	368	436	310	422.054	458.608	479.221	364.176	361.938	319.711
RLTA1_RS24340	712.755	0.316578	0.118585	2.66964	0.00759325	0.0470358	684	776	780	630	756	634	753.746	808.818	809.074	623.453	627.581	653.861
RLTA1_RS06800	1006.75	-0.389649	0.146074	-2.66747	0.00764243	0.0471588	910	761	790	1191	1424	1032	1002.79	793.184	819.447	1178.62	1182.11	1064.33
RLTA1_RS07820	5037.5	-0.333002	0.124828	-2.6677	0.00763732	0.0471588	4519	3921	4155	5761	6793	5341	4979.79	4086.83	4309.88	5701.13	5639.09	5508.31
RLTA1_RS13095	963.537	0.474581	0.177857	2.66834	0.00762279	0.0471588	885	1133	1163	838	1127	634	975.242	1180.92	1206.35	829.291	935.56	653.861
RLTA1_RS14380	1095.16	0.308017	0.115467	2.66756	0.00764034	0.0471588	1041	1226	1166	988	1152	972	1147.15	1277.85	1209.46	977.732	956.313	1002.45
RLTA1_RS16360	2608.14	-0.646839	0.242555	-2.66677	0.00765836	0.0471667	2427	1754	1539	3781	2821	3361	2674.48	1828.18	1596.37	3741.71	2341.81	3466.29
RLTA1_RS16900	2144.57	0.518212	0.194306	2.66699	0.00765346	0.0471667	1973	2838	2356	1654	1781	2110	2174.18	2958.02	2443.82	1636.81	1478.47	2176.1
RLTA1_RS02710	18821.9	-0.690058	0.258929	-2.66505	0.00769765	0.0473603	16535	10034	14012	29328	29667	15579	18221	10458.4	14534.3	29023.2	24627.6	16067
RLTA1_RS34810	160.154	-0.46908	0.176031	-2.66475	0.00770451	0.0473603	135	118	127	185	241	169	148.766	122.99	131.734	183.077	200.062	174.294
RLTA1_RS13190	504.113	-0.348247	0.130808	-2.66227	0.00776149	0.0476196	421	413	421	533	714	556	463.928	430.467	436.693	527.461	592.715	573.417
RLTA1_RS14250	526.264	-0.333854	0.125389	-2.66255	0.00775508	0.0476196	404	472	443	593	695	579	445.195	491.962	459.513	586.837	576.942	597.138
RLTA1_RS02270	356.56	0.403813	0.15187	2.65894	0.00783868	0.0479661	339	428	384	291	358	326	373.567	446.101	398.314	287.976	297.188	336.212
RLTA1_RS22340	1985.54	0.297657	0.111949	2.65887	0.00784032	0.0479661	1936	2144	2121	1795	2023	1832	2133.41	2234.67	2200.06	1776.35	1679.36	1889.39
RLTA1_RS34160	745.246	0.401079	0.150837	2.65903	0.00783665	0.0479661	693	876	836	597	732	707	763.664	913.048	867.162	590.796	607.657	729.147
RLTA1_RS06440	1883.66	-0.36833	0.138549	-2.65849	0.00784927	0.0479752	1476	1404	1777	2097	2439	2200	1626.5	1463.38	1843.24	2075.21	2024.69	2268.92
RLTA1_RS05650	1021.64	-0.469965	0.176837	-2.65762	0.00786954	0.0480166	828	745	850	1344	1561	905	912.429	776.507	881.684	1330.03	1295.84	933.35
RLTA1_RS23765	900.416	0.331824	0.124861	2.65756	0.00787097	0.0480166	911	1010	919	831	889	807	1003.89	1052.71	953.256	822.364	737.988	832.28
RLTA1_RS05565	1161.52	0.428876	0.161463	2.65618	0.00790319	0.048122	1114	1352	1312	969	1018	1132	1227.59	1409.18	1360.9	958.93	845.075	1167.46
RLTA1_RS10020	1164.9	0.343772	0.129423	2.6562	0.00790267	0.048122	1195	1192	1302	1082	1313	891	1316.85	1242.41	1350.53	1070.76	1089.96	918.911
RLTA1_RS33790	152.126	0.464227	0.174969	2.6532	0.00797325	0.0485027	146	186	168	135	151	121	160.887	193.866	174.262	133.597	125.35	124.79
RLTA1_RS26055	289.537	-0.59881	0.225804	-2.6519	0.00800402	0.0486439	228	233	190	437	436	244	251.249	242.854	197.082	432.458	361.938	251.643
RLTA1_RS06400	2628.85	-0.302792	0.114229	-2.65075	0.00803143	0.0487644	2271	2279	2106	2859	3605	2801	2502.57	2375.38	2184.5	2829.29	2992.63	2888.74
RLTA1_RS01660	3365.69	-0.80833	0.305244	-2.64814	0.00809356	0.0490307	2638	1705	2561	5410	6228	2259	2906.99	1777.11	2656.46	5353.78	5170.07	2329.76
RLTA1_RS07780	12041	-0.417951	0.157807	-2.64849	0.00808521	0.0490307	10513	8611	9995	13485	18901	11910	11585	8975.18	10367.6	13344.9	15690.3	12283.1
RLTA1_RS32150	2081.77	0.54604	0.206212	2.64795	0.00809814	0.0490307	2354	2463	2172	1889	2421	1161	2594.03	2567.16	2252.96	1869.37	2009.75	1197.37
RLTA1_RS33105	2246.2	0.391408	0.147885	2.64671	0.00812782	0.0491642	2396	2384	2432	2168	2486	1571	2640.31	2484.82	2522.65	2145.47	2063.71	1620.21
RLTA1_RS32935	1360.6	-0.349439	0.132073	-2.64581	0.00814967	0.04925	1111	1121	1155	1478	2062	1356	1224.29	1168.41	1198.05	1462.64	1711.73	1398.48
RLTA1_RS06660	2811.15	-0.464791	0.175777	-2.64421	0.00818823	0.0494366	2385	2003	2286	3730	4190	2531	2628.19	2087.71	2371.21	3691.24	3478.26	2610.29
RLTA1_RS12770	2473.85	0.390963	0.147923	2.64301	0.00821727	0.0495655	2314	3161	2484	2118	2704	2018	2549.95	3294.68	2576.59	2095.99	2244.68	2081.22
RLTA1_RS28130	877.152	0.436615	0.165287	2.64156	0.00825256	0.0497317	997	832	1023	847	911	622	1098.66	867.187	1061.13	838.198	756.251	641.485
RLTA1_RS02730	2015.08	0.289871	0.109749	2.64122	0.0082609	0.0497354	2085	2084	2102	1813	2094	1850	2297.6	2172.14	2180.35	1794.16	1738.3	1907.95
RLTA1_RS19370	6970.97	0.265414	0.100506	2.64077	0.00827173	0.049754	6812	7418	7320	6114	7725	6333	7506.6	7731.72	7592.85	6050.46	6412.78	6531.39
RLTA1_RS06950	464.503	0.375975	0.142418	2.63993	0.00829222	0.0498308	447	483	557	385	482	419	492.58	503.427	577.762	380.999	400.124	432.125
RLTA1_RS02450	561.172	-0.386624	0.146496	-2.63914	0.00831157	0.0499004	488	413	474	624	823	588	537.76	430.467	491.668	617.515	683.199	606.42
RLTA1_RS07410	367.762	0.393136	0.149019	2.63816	0.00833583	0.0499994	407	388	386	338	405	274	448.501	404.409	400.388	334.487	336.204	282.583
RLTA1_RS13735	131.3	0.48615	0.1843	2.63782	0.00834404	0.0500021	140	157	137	101	144	105	154.275	163.64	142.107	99.9504	119.539	108.289
RLTA1_RS00050	9599.19	-0.80801	0.306924	-2.6326	0.00847334	0.0507297	7667	5050	6966	15575	17789	6280	8448.79	5263.57	7225.66	15413.1	14767.2	6476.73
RLTA1_RS13750	385.473	0.475832	0.180788	2.63199	0.00848863	0.050774	366	525	381	315	423	295	403.32	547.203	395.202	311.726	351.146	304.241
RLTA1_RS00875	313.795	0.449589	0.170839	2.63166	0.00849698	0.0507767	276	388	365	254	350	246	304.143	404.409	378.605	251.36	290.547	253.706
RLTA1_RS29655	31494.7	-0.650186	0.24715	-2.63074	0.00852004	0.0508673	25285	19003	24947	49694	49391	24476	27863.3	19806.7	25876.9	49177.6	41001.1	25242.7
RLTA1_RS02435	457.45	-0.34814	0.13252	-2.62708	0.00861217	0.0513222	362	404	374	493	656	489	398.912	421.086	387.941	487.876	544.567	504.318
RLTA1_RS10915	708.885	-0.389433	0.148221	-2.62737	0.00860471	0.0513222	624	560	550	880	985	701	687.628	583.683	570.501	870.855	817.681	722.959
RLTA1_RS08655	360.875	-0.403045	0.153536	-2.62509	0.00866269	0.0515412	267	309	305	364	544	408	294.225	322.068	316.369	360.217	451.592	420.781
RLTA1_RS35955	162.104	-0.696262	0.265243	-2.625	0.00866494	0.0515412	114	121	115	134	232	268	125.624	126.117	119.287	132.607	192.591	276.395
RLTA1_RS23390	3882	0.321943	0.122668	2.6245	0.00867761	0.0515549	3887	4089	4236	3786	3729	3404	4283.35	4261.93	4393.9	3746.65	3095.57	3510.63
RLTA1_RS31580	6637.08	-0.660675	0.251755	-2.62428	0.00868327	0.0515549	5545	3737	5230	10722	9817	5461	6110.41	3895.04	5424.95	10610.6	8149.42	5632.07
RLTA1_RS08310	5251.69	-0.450523	0.17173	-2.62344	0.00870464	0.0516342	4336	3605	4608	6771	7812	4857	4778.13	3757.46	4779.76	6700.63	6485	5009.15
RLTA1_RS18130	106.672	-0.585569	0.223294	-2.62242	0.00873087	0.0517421	92	81	68	109	172	129	101.381	84.4256	70.5347	107.867	142.783	133.041
RLTA1_RS32925	1186.92	0.32075	0.122342	2.62175	0.00874794	0.0517955	1158	1190	1387	1047	1304	1016	1276.08	1240.33	1438.7	1036.12	1082.49	1047.83
RLTA1_RS15065	1845.93	0.399393	0.152492	2.6191	0.00881616	0.0521515	1744	2083	2128	1645	2164	1310	1921.83	2171.09	2207.32	1627.9	1796.41	1351.04
RLTA1_RS04780	1640.83	0.295394	0.112832	2.61799	0.00884505	0.0522743	1671	1807	1639	1531	1785	1380	1841.39	1883.42	1700.09	1515.09	1481.79	1423.23
RLTA1_RS04775	1326.69	0.738576	0.282186	2.61734	0.00886186	0.0523256	1294	1836	1579	1357	1297	546	1425.95	1913.65	1637.86	1342.9	1076.68	563.104
RLTA1_RS13150	6882.86	0.398194	0.152166	2.61683	0.00887503	0.0523553	6722	8086	7369	6511	5945	6244	7407.43	8427.97	7643.68	6443.33	4935.14	6439.6
RLTA1_RS14180	1465.38	0.456983	0.174655	2.61649	0.00888395	0.05236	1337	1973	1501	1361	1522	1062	1473.33	2056.44	1556.95	1346.86	1263.46	1095.27
RLTA1_RS07180	14159.6	-0.297449	0.11373	-2.61539	0.00891258	0.0524807	11274	11491	13222	15436	19681	14766	12423.6	11977	13714.8	15275.6	16337.8	15228.6
RLTA1_RS22460	395.664	-0.412604	0.157822	-2.61437	0.0089393	0.0525157	266	342	355	439	514	480	293.123	356.464	368.233	434.438	426.688	495.036
RLTA1_RS33075	236.2	-0.491204	0.187897	-2.61422	0.00894301	0.0525157	143	197	218	251	358	274	157.581	205.331	226.126	248.391	297.188	282.583
RLTA1_RS36045	163.748	-0.512842	0.196163	-2.61437	0.0089392	0.0525157	112	127	144	205	261	153	123.42	132.371	149.368	202.87	216.665	157.793
RLTA1_RS03070	434.175	-0.534819	0.204798	-2.61145	0.00901595	0.0527036	278	402	326	647	549	432	306.347	419.001	338.152	640.276	455.743	445.533
RLTA1_RS03370	979.128	-0.333589	0.12773	-2.61167	0.00901018	0.0527036	845	754	851	1107	1362	1017	931.163	785.888	882.721	1095.5	1130.64	1048.86
RLTA1_RS05920	359.82	-0.432807	0.16571	-2.61184	0.00900559	0.0527036	242	311	316	364	521	434	266.676	324.153	327.779	360.217	432.499	447.595
RLTA1_RS07880	153.244	0.449539	0.172065	2.61261	0.0089855	0.0527036	159	175	167	118	161	134	175.213	182.401	173.225	116.774	133.651	138.198
RLTA1_RS20105	3941.51	-0.783308	0.299872	-2.61214	0.00899765	0.0527036	3271	1888	3007	6303	6965	2849	3604.54	1967.85	3119.09	6237.5	5781.88	2938.25
RLTA1_RS13620	121.934	0.532451	0.203994	2.61013	0.00905085	0.0528583	120	147	142	81	133	105	132.236	153.217	147.293	80.1582	110.408	108.289
RLTA1_RS24740	2615.22	-0.38608	0.147933	-2.60983	0.00905884	0.0528583	2253	2061	2094	3091	3955	2469	2482.73	2148.16	2172.05	3058.88	3283.18	2546.34
RLTA1_RS15775	12796.2	0.555241	0.212784	2.60941	0.00906979	0.0528742	15463	13843	13706	12265	8684	11389	17039.7	14428.4	14216.9	12137.5	7208.88	11745.8
RLTA1_RS12670	4726.48	-0.409932	0.15721	-2.60754	0.00911941	0.0531154	3738	3510	4243	6065	6828	4373	4119.16	3658.44	4401.16	6001.97	5668.15	4509.99
RLTA1_RS14170	3415.91	0.777187	0.298228	2.60602	0.00916023	0.0532568	4391	3590	4206	3678	3068	1324	4838.74	3741.83	4362.78	3639.78	2546.85	1365.48
RLTA1_RS33945	1541.95	0.403142	0.154686	2.60619	0.00915552	0.0532568	1518	1650	1809	1274	1880	1126	1672.79	1719.78	1876.43	1260.76	1560.65	1161.27
RLTA1_RS13070	932.794	0.426287	0.163729	2.60361	0.00922484	0.053584	983	931	1114	922	977	644	1083.23	970.374	1155.52	912.418	811.04	664.174
RLTA1_RS20290	618.119	-0.389556	0.149661	-2.60293	0.00924314	0.0536419	549	481	482	687	926	634	604.98	501.342	499.967	679.86	768.703	653.861
RLTA1_RS23630	1202.83	-0.448368	0.172291	-2.60239	0.00925756	0.0536772	939	942	998	1197	1527	1661	1034.75	981.839	1035.2	1184.56	1267.61	1713.03
RLTA1_RS31350	4546.48	-0.337162	0.129577	-2.60201	0.00926789	0.0536887	3721	3828	3820	4568	6072	5493	4100.42	3989.89	3962.39	4520.53	5040.57	5665.07
RLTA1_RS16185	3554.85	-0.673567	0.258897	-2.60168	0.00927679	0.053692	3105	1933	2683	6009	4595	3247	3421.61	2014.75	2783.01	5946.55	3814.46	3348.71
RLTA1_RS18310	3887.2	0.343853	0.132322	2.5986	0.00936037	0.0540806	3735	4092	4496	3867	3963	3066	4115.85	4265.06	4663.59	3826.81	3289.82	3162.04
RLTA1_RS29635	16748.8	0.464105	0.178599	2.59859	0.00936074	0.0540806	20176	16612	18039	17313	14782	12440	22233.3	17314.6	18711.4	17133.1	12271	12829.7
RLTA1_RS33475	683.512	0.358832	0.138104	2.59827	0.00936953	0.0540828	649	728	800	563	705	635	715.177	758.788	829.82	557.149	585.244	654.892
RLTA1_RS08695	7543.31	-0.354801	0.136571	-2.59793	0.00937883	0.0540879	6573	5755	6382	7675	10563	8760	7243.23	5998.39	6619.89	7595.24	8768.7	9034.41
RLTA1_RS20710	511.101	0.493578	0.190043	2.59719	0.00939887	0.054155	486	643	567	362	632	378	535.556	670.194	588.135	358.238	524.644	389.841
RLTA1_RS00155	140.941	-0.483187	0.186149	-2.5957	0.0094398	0.0542936	104	108	121	144	206	174	114.605	112.568	125.51	142.503	171.007	179.451
RLTA1_RS31630	671.669	-0.403848	0.155568	-2.59596	0.0094328	0.0542936	485	546	609	685	1052	721	534.454	569.091	631.7	677.881	873.3	743.586
RLTA1_RS11455	6616.45	-0.628176	0.242149	-2.59417	0.00948197	0.0544694	5134	4032	5529	10771	9503	5387	5657.5	4202.52	5735.09	10659.1	7888.75	5555.75
RLTA1_RS20015	103.712	-0.754199	0.29075	-2.59398	0.00948729	0.0544694	58	72	89	93	139	178	63.9141	75.045	92.3175	92.0335	115.388	183.576
RLTA1_RS04670	765.67	-0.83134	0.320922	-2.59048	0.00958434	0.0549633	404	530	632	1171	1564	469	445.195	552.415	655.558	1158.83	1298.33	483.692
RLTA1_RS10655	638.326	-0.472453	0.182396	-2.59026	0.0095904	0.0549633	445	514	557	605	882	868	490.376	535.738	577.762	598.713	732.177	895.191
RLTA1_RS19905	4640.27	-0.604886	0.233582	-2.58961	0.00960857	0.0550185	3738	2936	3727	5484	8914	3849	4119.16	3060.17	3865.92	5427.01	7399.81	3969.57
RLTA1_RS02370	2574.41	-0.306284	0.118339	-2.5882	0.00964789	0.0551945	2163	2124	2226	2675	3394	2982	2383.56	2213.83	2308.97	2647.2	2817.47	3075.41
RLTA1_RS32595	220.307	0.459656	0.177695	2.58677	0.0096881	0.0553753	224	280	219	176	250	169	246.841	291.842	227.163	174.171	207.533	174.294
RLTA1_RS24035	163.068	-0.501897	0.194108	-2.58566	0.00971939	0.0555049	144	122	115	170	232	206	158.683	127.16	119.287	168.233	192.591	212.453
RLTA1_RS12095	937.906	0.328491	0.127098	2.58456	0.00975045	0.0556329	925	1058	974	781	990	873	1019.32	1102.74	1010.31	772.883	821.832	900.347
RLTA1_RS07870	5438.44	0.344601	0.133458	2.58209	0.00982026	0.0559816	6071	5482	5640	5190	5204	4771	6690.05	5713.84	5850.23	5136.06	4320.01	4920.45
RLTA1_RS26375	1013.35	-0.693694	0.268814	-2.58057	0.00986374	0.0561796	752	630	808	1432	1930	715	828.68	656.644	838.118	1417.12	1602.16	737.398
RLTA1_RS04960	1049.46	-0.421125	0.163333	-2.57833	0.00992805	0.056446	879	748	910	1038	1476	1311	968.63	779.634	943.92	1027.21	1225.28	1352.07
RLTA1_RS12370	924.181	-0.38255	0.148354	-2.57863	0.00991933	0.056446	781	699	788	1103	1098	1101	860.637	728.562	817.373	1091.54	911.486	1135.49
RLTA1_RS13060	138.374	-0.549628	0.213211	-2.57786	0.00994144	0.0564723	107	88	123	187	207	132	117.911	91.7217	127.585	185.057	171.838	136.135
RLTA1_RS26885	3544.62	0.526577	0.20431	2.57734	0.00995652	0.0565081	3888	3467	4488	3708	3390	2163	4284.45	3613.63	4655.29	3669.46	2814.15	2230.76
RLTA1_RS11245	25794.8	0.613697	0.23824	2.57597	0.00999607	0.0566825	31300	23543	33327	28054	20759	15683	34491.6	24538.7	34569.3	27762.4	17232.7	16174.3
RLTA1_RS27035	226.677	-0.449815	0.174669	-2.57524	0.010017	0.0567512	164	195	184	305	309	220	180.723	203.247	190.859	301.83	256.511	226.892
RLTA1_RS02820	8481.09	-0.51138	0.198624	-2.57461	0.0100353	0.05677	7286	5482	6978	12043	12162	7652	8028.94	5713.84	7238.1	11917.8	10096.1	7891.7
RLTA1_RS14075	198.513	0.493646	0.191743	2.57452	0.010038	0.05677	252	188	215	182	196	147	277.696	195.951	223.014	180.109	162.706	151.605
RLTA1_RS19565	1762.16	0.432765	0.168183	2.57318	0.0100768	0.0569394	2028	1847	1844	1669	1455	1591	2234.79	1925.11	1912.74	1651.65	1207.84	1640.84
RLTA1_RS11405	1276.79	-0.391914	0.152382	-2.57191	0.0101138	0.0570986	1158	895	1065	1511	1747	1359	1276.08	932.851	1104.7	1495.3	1450.24	1401.57
RLTA1_RS13525	469.903	0.326671	0.127066	2.57088	0.0101442	0.0572199	491	505	483	430	485	410	541.066	526.357	501.004	425.531	402.615	422.844
RLTA1_RS17215	521.354	-0.607579	0.23642	-2.56992	0.0101722	0.057328	274	406	496	504	925	603	301.939	423.17	514.488	498.762	767.873	621.889
RLTA1_RS16385	795.631	-0.435642	0.169576	-2.56902	0.0101988	0.0574272	572	614	731	863	970	1053	630.326	639.967	758.248	854.031	805.229	1085.99
RLTA1_RS01700	459.882	-0.465438	0.181247	-2.56797	0.0102295	0.0575501	338	438	318	472	636	587	372.465	456.524	329.853	467.095	527.965	605.388
RLTA1_RS12290	939.88	0.6768	0.263687	2.56668	0.0102677	0.0577141	1405	896	951	850	594	811	1548.26	933.893	986.448	841.166	493.099	836.405
RLTA1_RS06825	2131.44	0.339128	0.132263	2.56404	0.0103462	0.0580544	1888	2457	2411	1944	2294	1763	2080.52	2560.91	2500.87	1923.8	1904.33	1818.23
RLTA1_RS31270	841.771	0.354297	0.138174	2.56414	0.0103431	0.0580544	858	932	884	654	913	787	945.488	971.416	916.951	647.203	757.911	811.653
RLTA1_RS11155	1893.88	-0.554601	0.216395	-2.56291	0.0103799	0.0581678	1635	1218	1477	2708	2926	1601	1801.72	1269.51	1532.06	2679.86	2428.97	1651.15
RLTA1_RS18805	1751.04	-0.37112	0.144813	-2.56276	0.0103845	0.0581678	1314	1612	1401	1739	2572	2006	1447.99	1680.17	1453.22	1720.93	2135.1	2068.84
RLTA1_RS03180	122.309	-0.516636	0.201661	-2.56191	0.0104099	0.058229	83	114	88	144	159	153	91.4633	118.821	91.2802	142.503	131.991	157.793
RLTA1_RS05665	488.291	0.352624	0.137674	2.56129	0.0104283	0.058229	544	481	523	445	521	401	599.47	501.342	542.495	440.375	432.499	413.562
RLTA1_RS18835	500.469	-0.425104	0.16598	-2.56118	0.0104316	0.058229	455	345	406	540	706	582	501.395	359.591	421.134	534.388	586.074	600.232
RLTA1_RS22510	1545.18	-0.425588	0.16615	-2.56148	0.0104229	0.058229	1356	1113	1256	2022	2177	1460	1494.27	1160.07	1302.82	2000.99	1807.2	1505.74
RLTA1_RS16895	1247.53	0.428194	0.167236	2.56042	0.0104547	0.0583071	1146	1582	1332	959	1222	1191	1262.86	1648.91	1381.65	949.034	1014.42	1228.31
RLTA1_RS15705	4758.51	-0.450971	0.176226	-2.55904	0.0104961	0.0584541	4041	3249	4071	6623	5844	4929	4453.05	3386.41	4222.75	6554.17	4851.3	5083.4
RLTA1_RS22495	296.924	-0.369433	0.14437	-2.55894	0.0104992	0.0584541	245	232	256	323	401	341	269.982	241.812	265.542	319.643	332.883	351.682
RLTA1_RS07625	1063.26	-0.592664	0.231723	-2.55764	0.0105384	0.058482	778	676	946	1085	1247	1675	857.331	704.589	981.262	1073.72	1035.18	1727.47
RLTA1_RS08985	1041.4	0.628406	0.245698	2.55763	0.0105387	0.058482	1027	894	1668	1000	848	738	1131.72	931.809	1730.17	989.607	703.953	761.118
RLTA1_RS21520	2766.15	-0.330265	0.129132	-2.55757	0.0105406	0.058482	2346	2103	2483	3334	3587	2877	2585.22	2191.94	2575.55	3299.35	2977.69	2967.12
RLTA1_RS23985	87.1797	-0.730084	0.285403	-2.55808	0.0105252	0.058482	57	83	46	86	166	100	62.8122	86.5102	47.7146	85.1062	137.802	103.133
RLTA1_RS00280	778.04	0.352442	0.138035	2.55329	0.0106712	0.0586339	719	912	843	655	799	717	792.315	950.57	874.423	648.193	663.276	739.461
RLTA1_RS02325	5091.36	-0.497271	0.194795	-2.55279	0.0106864	0.0586339	4164	3548	4224	6716	8183	4306	4588.59	3698.05	4381.45	6646.2	6792.98	4440.89
RLTA1_RS02990	28059.1	-0.67489	0.264333	-2.55318	0.0106746	0.0586339	23094	15000	22903	44039	44880	21988	25448.8	15634.4	23756.7	43581.3	37256.4	22676.8
RLTA1_RS07360	703.363	-0.415906	0.162793	-2.55481	0.0106247	0.0586339	539	537	631	673	1046	851	593.961	559.711	654.521	666.006	868.319	877.658
RLTA1_RS07815	5482.65	-0.368943	0.14436	-2.55571	0.0105971	0.0586339	4432	3905	5208	5976	7467	6232	4883.92	4070.15	5402.13	5913.89	6198.6	6427.22
RLTA1_RS10240	4576.02	0.309798	0.121339	2.55315	0.0106753	0.0586339	4836	4552	4939	4424	4957	3652	5329.12	4744.51	5123.1	4378.02	4114.97	3766.4
RLTA1_RS13080	457.09	0.335497	0.131298	2.55523	0.0106117	0.0586339	436	508	501	397	476	412	480.458	529.484	519.675	392.874	395.143	424.906
RLTA1_RS15250	3381.74	0.32125	0.125836	2.55294	0.0106818	0.0586339	3305	3708	3629	2865	4048	2738	3642	3864.82	3764.27	2835.23	3360.38	2823.77
RLTA1_RS16445	1403.22	0.315495	0.123432	2.55603	0.0105875	0.0586339	1465	1414	1523	1376	1440	1158	1614.38	1473.8	1579.77	1361.7	1195.39	1194.28
RLTA1_RS16925	14602.9	0.304582	0.119267	2.55378	0.0106561	0.0586339	15813	14399	15409	13752	16088	11865	17425.4	15008	15983.4	13609.1	13355.2	12236.7
RLTA1_RS18495	874.649	0.432249	0.169182	2.55493	0.0106209	0.0586339	748	1017	1089	671	916	785	824.272	1060.01	1129.59	664.027	760.402	809.591
RLTA1_RS21565	4443.31	-0.470293	0.184051	-2.55524	0.0106116	0.0586339	3467	3289	3786	4612	5283	6336	3820.52	3428.1	3927.12	4564.07	4385.59	6534.48
RLTA1_RS28850	483.924	-0.392658	0.153756	-2.55377	0.0106565	0.0586339	373	369	443	501	648	596	411.034	384.606	459.513	495.793	537.926	614.67
RLTA1_RS17065	340.077	-0.49242	0.192967	-2.55184	0.0107156	0.0587444	301	261	236	410	552	318	331.692	272.038	244.797	405.739	458.233	327.962
RLTA1_RS13195	448.455	0.330043	0.129386	2.55084	0.0107464	0.0588628	453	475	486	381	474	409	499.191	495.089	504.116	377.04	393.483	421.812
RLTA1_RS16400	4203.2	0.341777	0.134158	2.54757	0.0108477	0.0593479	4490	4311	4487	4056	3896	3758	4947.84	4493.32	4654.25	4013.85	3234.2	3875.72
RLTA1_RS20130	246.449	0.377666	0.148256	2.54738	0.0108534	0.0593479	257	266	265	232	245	204	283.206	277.25	274.878	229.589	203.383	210.39
RLTA1_RS10335	345.222	-0.363433	0.142711	-2.54664	0.0108765	0.0594237	288	263	303	402	449	383	317.367	274.123	314.294	397.822	372.73	394.998
RLTA1_RS00675	150.317	-0.514384	0.202079	-2.54546	0.0109135	0.0595753	116	134	100	207	190	163	127.828	139.667	103.727	204.849	157.725	168.106
RLTA1_RS28315	306.923	-0.38945	0.153017	-2.54515	0.0109232	0.0595778	209	269	276	347	421	341	230.311	280.377	286.288	343.394	349.486	351.682
RLTA1_RS12280	1233.39	0.621765	0.244325	2.54483	0.0109332	0.0595818	1730	1117	1364	1284	1070	733	1906.4	1164.24	1414.84	1270.66	888.242	755.962
RLTA1_RS12915	787.866	0.324059	0.127409	2.54346	0.0109759	0.0597641	835	800	842	726	777	714	920.143	833.833	873.386	718.455	645.013	736.367
RLTA1_RS08770	455.732	-0.422675	0.16634	-2.54104	0.0110525	0.0601298	296	418	392	496	695	483	326.182	435.678	406.612	490.845	576.942	498.13
RLTA1_RS04430	1483.36	0.357982	0.140961	2.53959	0.0110983	0.0602266	1406	1828	1489	1242	1570	1327	1549.37	1905.31	1544.5	1229.09	1303.31	1368.57
RLTA1_RS12850	319.248	0.978787	0.385377	2.53982	0.0110909	0.0602266	684	282	215	195	225	257	753.746	293.926	223.014	192.973	186.78	265.051
RLTA1_RS34870	234.062	-0.426047	0.167742	-2.5399	0.0110884	0.0602266	170	177	219	253	317	283	187.335	184.486	227.163	250.371	263.152	291.865
RLTA1_RS23945	1125.6	-0.357236	0.140767	-2.53779	0.0111556	0.0604867	812	937	1050	1165	1538	1322	894.798	976.627	1089.14	1152.89	1276.74	1363.41
RLTA1_RS23710	306.736	0.366415	0.144412	2.53729	0.0111713	0.0605205	292	344	343	288	310	254	321.775	358.548	355.785	285.007	257.341	261.957
RLTA1_RS18810	691.764	-0.464542	0.183169	-2.53614	0.0112081	0.0606691	505	504	639	791	1154	645	556.494	525.315	662.819	782.78	957.974	665.205
RLTA1_RS13440	1227.45	0.781385	0.308331	2.53424	0.0112691	0.0609481	1659	1171	1550	1130	1355	451	1828.16	1220.52	1607.78	1118.26	1124.83	465.128
RLTA1_RS30580	2191.26	0.306009	0.120809	2.53301	0.0113087	0.0611108	1991	2483	2397	1961	2425	1867	2194.02	2588.01	2486.35	1940.62	2013.07	1925.49
RLTA1_RS05695	568.988	0.409081	0.161523	2.53265	0.0113205	0.0611232	625	577	634	562	603	397	688.73	601.402	657.632	556.159	500.57	409.436
RLTA1_RS22720	319.45	-0.368168	0.145429	-2.53161	0.0113542	0.0612535	229	276	286	351	449	349	252.351	287.673	296.661	347.352	372.73	359.933
RLTA1_RS18025	289.751	-0.686775	0.271434	-2.53017	0.0114006	0.0614009	163	243	225	222	535	396	179.621	253.277	233.387	219.693	444.121	408.405
RLTA1_RS22350	2484.47	-0.329527	0.130229	-2.53037	0.0113941	0.0614009	2228	1957	2035	2916	3133	2729	2455.18	2039.77	2110.85	2885.7	2600.81	2814.49
RLTA1_RS22060	901.956	-0.394223	0.155881	-2.52899	0.011439	0.0615563	734	701	770	901	1186	1161	808.844	730.647	798.702	891.636	984.538	1197.37
RLTA1_RS21325	5293.66	-0.350053	0.138445	-2.52846	0.0114564	0.0615985	4103	4222	4860	5617	6641	6523	4521.37	4400.56	5041.16	5558.63	5512.91	6727.34
RLTA1_RS16250	9132.03	-0.486493	0.192549	-2.52659	0.0115175	0.0618751	7376	6277	7857	13147	12813	8072	8128.11	6542.47	8149.87	13010.4	10636.5	8324.86
RLTA1_RS18830	2466.37	-0.30377	0.120304	-2.52502	0.0115691	0.0620487	2080	1991	2175	2923	3333	2439	2292.09	2075.2	2256.07	2892.62	2766.83	2515.4
RLTA1_RS19215	4610.84	0.287864	0.114004	2.52504	0.0115685	0.0620487	4387	4960	5017	4444	5063	3739	4834.33	5169.77	5204.01	4397.82	4202.96	3856.13
RLTA1_RS26930	254.487	-0.42578	0.168653	-2.52458	0.0115835	0.0620745	231	196	186	309	338	280	254.555	204.289	192.933	305.789	280.585	288.771
RLTA1_RS09035	1703.42	0.375413	0.148821	2.52257	0.01165	0.062275	1775	1792	1877	1351	1644	1695	1955.99	1867.79	1946.97	1336.96	1364.74	1748.1
RLTA1_RS26460	304.451	-0.367767	0.145784	-2.52269	0.0116461	0.062275	232	269	252	322	415	355	255.657	280.377	261.393	318.654	344.505	366.121
RLTA1_RS30190	288.656	0.420581	0.166723	2.52264	0.0116478	0.062275	273	338	326	284	294	209	300.837	352.295	338.152	281.049	244.059	215.547
RLTA1_RS04935	18741.6	-0.377224	0.149588	-2.52175	0.0116774	0.0623698	13819	15608	16794	23348	27362	17176	15228.1	16268.1	17420	23105.4	22714.1	17714.1
RLTA1_RS15375	3356.76	0.345394	0.137019	2.52077	0.0117099	0.0624804	3076	3875	3703	3319	3374	2701	3389.65	4038.88	3841.03	3284.51	2800.87	2785.61
RLTA1_RS18000	396.297	0.394198	0.156409	2.5203	0.0117255	0.0624804	370	452	454	392	376	318	407.728	471.116	470.923	387.926	312.13	327.962
RLTA1_RS20990	3234.17	0.314725	0.124879	2.52025	0.0117272	0.0624804	3011	3444	3711	2714	3721	2786	3318.03	3589.65	3849.33	2685.79	3088.93	2873.27
RLTA1_RS35930	152.468	-0.778205	0.308866	-2.51955	0.0117504	0.0625519	117	82	118	127	202	276	128.93	85.4679	122.398	125.68	167.687	284.646
RLTA1_RS00465	134.24	-0.493746	0.196033	-2.51869	0.0117794	0.0626027	115	97	103	179	186	135	126.726	101.102	106.839	177.14	154.405	139.229
RLTA1_RS35090	1473.42	0.388152	0.154106	2.51873	0.011778	0.0626027	1545	1632	1549	1402	1263	1352	1702.54	1701.02	1606.74	1387.43	1048.46	1394.35
RLTA1_RS31165	2108.32	-0.473303	0.187964	-2.51805	0.0118008	0.062665	1747	1507	1736	3118	2624	2026	1925.14	1570.73	1800.71	3085.6	2178.27	2089.47
RLTA1_RS28825	1051.6	-0.37806	0.150294	-2.51547	0.0118875	0.0630212	824	896	869	1069	1342	1352	908.021	933.893	901.392	1057.89	1114.04	1394.35
RLTA1_RS29915	461.003	0.399339	0.15875	2.51553	0.0118854	0.0630212	452	483	551	463	459	343	498.089	503.427	571.539	458.188	381.031	353.745
RLTA1_RS29495	577.845	-0.432732	0.172068	-2.51489	0.0119069	0.0630724	484	423	484	669	931	539	533.352	440.889	502.041	662.047	772.854	555.885
RLTA1_RS29760	419.25	0.466611	0.185628	2.51368	0.0119479	0.0632372	543	398	430	378	382	354	598.369	414.832	446.028	374.072	317.111	365.089
RLTA1_RS24490	401.55	-0.402255	0.16016	-2.51158	0.0120194	0.0635633	360	279	338	455	559	443	396.708	290.799	350.599	450.271	464.044	456.877
RLTA1_RS32945	382.269	0.341812	0.136142	2.51071	0.0120487	0.0636663	379	423	408	322	399	351	417.646	440.889	423.208	318.654	331.223	361.995
RLTA1_RS19250	326.663	-0.408691	0.162981	-2.5076	0.0121554	0.0641775	235	278	283	414	469	309	258.962	289.757	293.549	409.697	389.332	318.68
RLTA1_RS05830	253.357	-0.676907	0.270076	-2.50636	0.0121982	0.0642761	187	187	177	239	288	446	206.068	194.909	183.598	236.516	239.078	459.971
RLTA1_RS15620	1227.54	-0.349156	0.139317	-2.50619	0.0122041	0.0642761	916	1017	1128	1463	1760	1180	1009.4	1060.01	1170.05	1447.8	1461.03	1216.96
RLTA1_RS28155	1119.89	0.426693	0.170247	2.50631	0.0121998	0.0642761	1162	1184	1291	1056	1290	727	1280.49	1234.07	1339.12	1045.03	1070.87	749.774
RLTA1_RS00835	291.531	-0.386569	0.154309	-2.50517	0.0122394	0.0643824	216	245	255	301	398	352	238.025	255.362	264.505	297.872	330.393	363.027
RLTA1_RS15700	15125.2	-0.593513	0.236929	-2.50503	0.0122443	0.0643824	12518	9370	12158	23078	23307	12017	13794.4	9766.27	12611.2	22838.2	19347.9	12393.4
RLTA1_RS10940	2515.27	0.314959	0.12583	2.50305	0.0123128	0.0646901	2446	2686	2767	2322	2414	2351	2695.41	2799.6	2870.14	2297.87	2003.94	2424.65
RLTA1_RS27040	208.479	-0.409776	0.163755	-2.50237	0.0123366	0.0647623	180	172	154	251	282	224	198.354	179.274	159.74	248.391	234.098	231.017
RLTA1_RS11705	746.804	-0.39197	0.156763	-2.50039	0.0124056	0.0650712	560	593	678	882	1144	698	617.102	618.079	703.272	872.834	949.672	719.865
RLTA1_RS20250	5872.82	-0.496154	0.198485	-2.49971	0.0124296	0.065144	4881	3916	4973	8450	8336	5174	5378.7	4081.61	5158.37	8362.18	6919.99	5336.08
RLTA1_RS27930	480.659	0.565064	0.226244	2.49758	0.0125044	0.0654825	408	606	617	292	573	386	449.603	631.629	639.999	288.965	475.666	398.092
RLTA1_RS08295	1866.46	0.338993	0.135771	2.49679	0.0125323	0.0655757	2041	1803	2049	1787	1809	1624	2249.12	1879.25	2125.38	1768.43	1501.71	1674.87
RLTA1_RS06065	685.34	0.303293	0.121518	2.49588	0.0125645	0.0656908	671	774	699	625	732	596	739.42	806.734	725.055	618.505	607.657	614.67
RLTA1_RS14345	444.769	-0.393599	0.157719	-2.49557	0.0125753	0.0656938	309	374	408	455	664	498	340.508	389.817	423.208	450.271	551.208	513.6
RLTA1_RS05895	6265.22	-0.611763	0.245271	-2.49423	0.012623	0.0658895	4831	3921	5263	9452	10227	4730	5323.61	4086.83	5459.18	9353.77	8489.77	4878.17
RLTA1_RS31550	1971.49	-0.350092	0.140402	-2.49349	0.0126492	0.0659729	1628	1470	1807	2419	2666	1960	1794	1532.17	1874.36	2393.86	2213.13	2021.4
RLTA1_RS04825	424.217	-0.387803	0.155564	-2.49288	0.0126711	0.0660333	291	376	376	520	595	421	320.673	391.902	390.015	514.596	493.929	434.188
RLTA1_RS07590	1203.38	0.745331	0.299049	2.49234	0.0126906	0.0660815	1288	1629	1355	1294	1133	462	1419.33	1697.89	1405.51	1280.55	940.541	476.472
RLTA1_RS19790	264.715	0.44461	0.178438	2.49168	0.0127142	0.0661509	227	320	320	207	289	221	250.147	333.533	331.928	204.849	239.908	227.923
RLTA1_RS17350	4619.08	0.274161	0.110081	2.49054	0.0127548	0.0663086	4449	4755	5120	4035	4977	4286	4902.65	4956.1	5310.85	3993.07	4131.57	4420.26
RLTA1_RS23835	1241.99	-0.338765	0.136106	-2.48897	0.0128112	0.0665479	1073	991	1037	1518	1707	1204	1182.41	1032.91	1075.65	1502.22	1417.04	1241.72
RLTA1_RS32610	3553.47	-0.652478	0.262421	-2.48638	0.0129048	0.0669803	2543	2271	3009	4854	6762	2534	2802.3	2367.04	3121.16	4803.55	5613.36	2613.38
RLTA1_RS12965	671.002	0.437231	0.175875	2.48603	0.0129176	0.0669926	634	856	698	562	590	645	698.648	892.202	724.018	556.159	489.778	665.205
RLTA1_RS06625	1454.4	-0.413984	0.166699	-2.48342	0.0130127	0.0674313	1147	1109	1274	1376	2018	1889	1263.96	1155.9	1321.49	1361.7	1675.21	1948.17
RLTA1_RS20910	430.161	-0.374092	0.150684	-2.48262	0.0130419	0.0675283	347	353	360	559	525	454	382.383	367.929	373.419	553.191	435.82	468.222
RLTA1_RS07550	694.994	-0.631985	0.25481	-2.48022	0.0131301	0.0678684	548	436	557	909	1319	523	603.878	454.439	577.762	899.553	1094.95	539.383
RLTA1_RS23545	1001.31	0.328723	0.132551	2.47997	0.0131392	0.0678684	1074	1079	1000	929	1132	779	1183.51	1124.63	1037.27	919.345	939.711	803.403
RLTA1_RS33830	162.821	0.435259	0.175482	2.48037	0.0131248	0.0678684	159	181	190	143	148	147	175.213	188.655	197.082	141.514	122.86	151.605
RLTA1_RS05680	1911.31	0.807365	0.325613	2.47952	0.0131558	0.0678997	1360	3660	1913	1761	1719	970	1498.68	3814.79	1984.31	1742.7	1427	1000.39
RLTA1_RS15965	420.467	-0.391773	0.158142	-2.47735	0.0132363	0.0682601	363	328	337	542	570	409	400.014	341.872	349.562	536.367	473.176	421.812
RLTA1_RS14710	1048.36	0.360468	0.145567	2.4763	0.0132753	0.0684068	976	1048	1319	912	1141	877	1075.52	1092.32	1368.17	902.522	947.182	904.473
RLTA1_RS32035	663.318	0.392584	0.158642	2.47466	0.0133364	0.0686664	752	725	650	545	630	639	828.68	755.662	674.229	539.336	522.984	659.017
RLTA1_RS06890	6398.93	0.514882	0.208122	2.47394	0.0133631	0.0687488	8198	6016	7020	6595	5043	4940	9033.93	6270.43	7281.67	6526.46	4186.36	5094.75
RLTA1_RS10225	309.365	-0.371593	0.15024	-2.47333	0.0133861	0.0688124	261	249	253	378	430	306	287.614	259.531	262.431	374.072	356.957	315.586
RLTA1_RS18385	19829.9	-0.658391	0.266332	-2.47207	0.0134334	0.0690004	17266	10811	15282	32391	29397	15878	19026.6	11268.2	15851.6	32054.4	24403.4	16375.4
RLTA1_RS04345	218.261	-0.539201	0.218231	-2.47078	0.0134817	0.0690712	191	125	186	287	267	262	210.476	130.286	192.933	284.017	221.646	270.207
RLTA1_RS12665	497.25	-0.311953	0.126268	-2.47056	0.0134901	0.0690712	423	403	429	556	658	539	466.132	420.044	444.991	550.222	546.228	555.885
RLTA1_RS18895	481.464	0.366449	0.148308	2.47085	0.0134791	0.0690712	464	585	488	402	546	398	511.313	609.741	506.19	397.822	453.253	410.468
RLTA1_RS29195	3183.45	0.660241	0.267218	2.4708	0.0134811	0.0690712	3304	3921	3828	3564	2852	1462	3640.9	4086.83	3970.69	3526.96	2367.54	1507.8
RLTA1_RS19680	4437.24	-0.620779	0.251365	-2.46963	0.0135254	0.0691969	3396	2858	3635	6315	7903	3221	3742.28	2978.87	3770.49	6249.37	6560.54	3321.9
RLTA1_RS30110	1066.43	0.317099	0.128524	2.46723	0.0136162	0.0696057	966	1176	1214	983	1167	880	1064.5	1225.74	1259.25	972.784	968.765	907.567
RLTA1_RS07215	1358.52	-0.422139	0.171225	-2.46541	0.0136858	0.0698506	1254	934	1088	1722	1886	1355	1381.87	973.501	1128.56	1704.1	1565.63	1397.45
RLTA1_RS27340	1410.55	0.430681	0.174679	2.46555	0.0136802	0.0698506	1542	1338	1702	1334	1576	946	1699.23	1394.59	1765.44	1320.14	1308.29	975.634
RLTA1_RS22095	6318.38	-0.533375	0.216404	-2.46472	0.0137121	0.0698744	5439	3881	5256	9610	8133	5971	5993.6	4045.13	5451.92	9510.13	6751.47	6158.05
RLTA1_RS30610	770.594	0.412123	0.167203	2.46481	0.0137087	0.0698744	655	952	892	619	779	703	721.789	992.262	925.249	612.567	646.674	725.022
RLTA1_RS13000	194.447	-0.469905	0.191077	-2.45924	0.0139231	0.0708931	179	142	139	205	277	237	197.252	148.005	144.181	202.87	229.947	244.424
RLTA1_RS00600	733.337	-0.418165	0.170146	-2.45768	0.0139837	0.0710288	650	535	588	957	1033	690	716.279	557.626	609.918	947.054	857.527	711.615
RLTA1_RS06635	2680.13	0.384064	0.156288	2.45742	0.0139939	0.0710288	2994	2626	2957	2588	2353	2388	3299.29	2737.06	3067.22	2561.1	1953.3	2462.81
RLTA1_RS22435	2107.11	-0.31611	0.128626	-2.45759	0.0139872	0.0710288	1880	1690	1734	2524	2763	2152	2071.7	1761.47	1798.63	2497.77	2293.66	2219.41
RLTA1_RS34800	765.362	0.312531	0.127145	2.45806	0.0139689	0.0710288	748	862	791	675	779	712	824.272	898.456	820.484	667.985	646.674	734.304
RLTA1_RS15200	1429.08	-0.321462	0.130911	-2.45557	0.014066	0.0713386	1294	1118	1177	1581	1970	1515	1425.95	1165.28	1220.87	1564.57	1635.36	1562.46
RLTA1_RS28160	2068.91	0.405885	0.165704	2.44946	0.0143071	0.0724552	2040	2076	2567	2010	2260	1429	2248.01	2163.8	2662.68	1989.11	1876.1	1473.76
RLTA1_RS32615	169.329	0.642639	0.262364	2.44942	0.0143087	0.0724552	185	218	181	94	139	183	203.864	227.22	187.747	93.0231	115.388	188.733
RLTA1_RS21285	11166.5	0.253814	0.103688	2.44787	0.0143702	0.0727098	11155	11288	11936	10826	12144	9469	12292.5	11765.4	12380.9	10713.5	10081.1	9765.62
RLTA1_RS22990	1073.94	0.328373	0.134278	2.44546	0.0144666	0.0731397	1082	1154	1148	1029	1002	977	1192.33	1202.8	1190.79	1018.31	831.793	1007.61
RLTA1_RS02810	920.824	-0.408621	0.167168	-2.44438	0.0145101	0.0733023	698	724	820	1148	1408	820	769.174	754.619	850.565	1136.07	1168.83	845.687
RLTA1_RS31525	524.88	-0.668085	0.273347	-2.44409	0.0145218	0.0733039	373	381	394	785	956	351	411.034	397.113	408.686	776.842	793.607	361.995
RLTA1_RS03095	474.19	-0.38587	0.157944	-2.44308	0.0145625	0.0734517	401	354	407	594	563	540	441.889	368.971	422.171	587.827	467.365	556.916
RLTA1_RS19380	541.905	0.363517	0.148852	2.44214	0.0146003	0.0735846	589	576	560	497	625	398	649.059	600.36	580.874	491.835	518.833	410.468
RLTA1_RS12655	843.103	0.336183	0.137782	2.43996	0.014689	0.0739168	848	983	832	748	831	782	934.469	1024.57	863.013	740.226	689.841	806.497
RLTA1_RS21655	9042.85	-0.550873	0.225772	-2.43995	0.0146892	0.0739168	7721	5594	7397	13397	13502	7543	8508.29	5830.58	7672.72	13257.8	11208.5	7779.29
RLTA1_RS04325	643.205	0.367169	0.150534	2.43911	0.0147234	0.0740309	668	664	719	649	670	472	736.114	692.082	745.801	642.255	556.189	486.786
RLTA1_RS09170	1095.25	-0.644846	0.264482	-2.43815	0.0147627	0.074171	661	568	1198	1493	1358	1361	728.401	592.022	1242.66	1477.48	1127.32	1403.63
RLTA1_RS05070	128.691	-0.465802	0.191162	-2.43669	0.0148223	0.0744124	106	105	95	144	202	133	116.809	109.441	98.5411	142.503	167.687	137.166
RLTA1_RS20400	4773.06	-0.641392	0.263296	-2.43601	0.0148502	0.0744942	4168	2686	3659	7400	7624	3683	4593	2799.6	3795.39	7323.1	6328.93	3798.37
RLTA1_RS17465	183.878	-0.552603	0.226996	-2.43442	0.0149158	0.0747649	146	141	134	192	214	280	160.887	146.963	138.995	190.005	177.648	288.771
RLTA1_RS26250	341.622	-0.383697	0.157653	-2.43381	0.0149409	0.0748325	246	302	292	375	426	423	271.084	314.772	302.884	371.103	353.637	436.251
RLTA1_RS13855	834.342	0.648216	0.266507	2.43227	0.0150047	0.0750936	786	1123	983	882	819	385	866.147	1170.49	1019.64	872.834	679.879	397.06
RLTA1_RS20370	1939.6	0.329779	0.135604	2.43193	0.0150187	0.0751049	1881	2012	2228	1938	2038	1500	2072.8	2097.09	2311.05	1917.86	1691.81	1546.99
RLTA1_RS10965	9329.92	-0.490153	0.201672	-2.43045	0.0150802	0.0753543	7264	6200	8497	12614	14461	7962	8004.69	6462.21	8813.73	12482.9	12004.6	8211.42
RLTA1_RS04840	549.538	-0.398091	0.163819	-2.43006	0.0150965	0.075377	432	404	506	627	658	687	476.05	421.086	524.861	620.484	546.228	708.521
RLTA1_RS07380	5527.88	0.295482	0.121612	2.42972	0.0151105	0.0753885	5615	5811	5814	5298	5330	5066	6187.55	6056.76	6030.72	5242.94	4424.61	5224.7
RLTA1_RS29580	188.162	-0.394482	0.162624	-2.42573	0.0152777	0.0761635	156	162	142	214	266	202	171.907	168.851	147.293	211.776	220.815	208.328
RLTA1_RS02320	1709.32	-0.431761	0.178031	-2.42521	0.0152996	0.0762138	1380	1283	1455	1823	2929	1603	1520.72	1337.26	1509.24	1804.05	2431.46	1653.22
RLTA1_RS01570	201.947	-0.391685	0.161602	-2.42376	0.0153607	0.0764589	145	182	168	229	265	234	159.785	189.697	174.262	226.62	219.985	241.33
RLTA1_RS33975	309.219	-0.348838	0.143974	-2.42293	0.015396	0.0765755	230	261	280	333	424	347	253.453	272.038	290.437	329.539	351.976	357.87
RLTA1_RS20950	2303.01	-0.252687	0.104329	-2.42202	0.0154343	0.0767066	1890	2027	2034	2646	2934	2384	2082.72	2112.73	2109.82	2618.5	2435.61	2458.68
RLTA1_RS06475	232.7	0.409772	0.169387	2.41916	0.0155566	0.0770763	214	254	285	187	234	214	235.821	264.742	295.623	185.057	194.251	220.704
RLTA1_RS15690	2754.73	0.309031	0.127709	2.41981	0.0155286	0.0770763	2571	2932	3139	2696	2727	2377	2833.16	3056	3256.01	2667.98	2263.77	2451.46
RLTA1_RS19460	428.391	-0.329019	0.136006	-2.41916	0.0155566	0.0770763	356	375	343	483	541	489	392.301	390.859	355.785	477.98	449.102	504.318
RLTA1_RS25890	287.053	0.510038	0.210805	2.41947	0.0155431	0.0770763	229	402	328	219	287	248	252.351	419.001	340.226	216.724	238.248	255.769
RLTA1_RS20470	166.933	-0.390421	0.161505	-2.41739	0.0156321	0.0773502	131	142	136	193	227	183	144.358	148.005	141.069	190.994	188.44	188.733
RLTA1_RS21645	1734.56	-0.511524	0.211634	-2.41703	0.0156479	0.0773502	1383	1202	1460	2323	2864	1396	1524.02	1252.83	1514.42	2298.86	2377.5	1439.73
RLTA1_RS22950	326.432	0.44025	0.182129	2.41724	0.0156385	0.0773502	274	417	377	258	358	270	301.939	434.636	391.053	255.319	297.188	278.458
RLTA1_RS17525	39456.4	-0.429556	0.1778	-2.41595	0.0156943	0.0775201	30778	30873	33532	48657	63938	33581	33916.4	32178.7	34781.9	48151.3	53077	34632.9
RLTA1_RS23185	13623.2	0.520314	0.21542	2.41535	0.0157202	0.0775882	15174	14791	15446	13270	9097	12504	16721.3	15416.5	16021.7	13132.1	7551.72	12895.7
RLTA1_RS05250	762.709	-0.292625	0.121184	-2.41472	0.0157475	0.0776041	631	630	680	817	1069	798	695.342	656.644	705.347	808.509	887.412	822.998
RLTA1_RS31935	635.862	-0.374864	0.155236	-2.4148	0.0157439	0.0776041	584	454	525	739	839	704	643.549	473.2	544.569	731.32	696.482	726.053
RLTA1_RS00965	529.133	-0.559103	0.231601	-2.41408	0.015775	0.07768	375	419	418	870	692	442	413.238	436.72	433.581	860.959	574.452	455.846
RLTA1_RS18400	1424.99	0.364115	0.150888	2.41315	0.0158155	0.0778199	1589	1564	1380	1187	1708	1110	1751.03	1630.14	1431.44	1174.66	1417.87	1144.77
RLTA1_RS08710	817.296	-0.445366	0.184629	-2.41223	0.0158555	0.0779571	552	756	656	1039	1265	726	608.286	787.973	680.452	1028.2	1050.12	748.742
RLTA1_RS01115	1093.72	-0.268809	0.111459	-2.41174	0.0158767	0.078002	889	949	971	1256	1383	1159	979.649	989.135	1007.19	1242.95	1148.07	1195.31
RLTA1_RS06150	3736.1	0.279441	0.115931	2.4104	0.015935	0.0782286	3527	4146	3935	3331	3875	3504	3886.64	4321.34	4081.68	3296.38	3216.77	3613.77
RLTA1_RS01750	440.797	-0.413893	0.17175	-2.40985	0.015959	0.0782867	374	306	389	523	669	424	412.136	318.941	403.5	517.565	555.359	437.282
RLTA1_RS28230	259.08	0.359499	0.149199	2.40953	0.015973	0.0782955	254	268	303	239	272	212	279.9	279.334	314.294	236.516	225.796	218.641
RLTA1_RS04745	1273.84	-0.49294	0.204854	-2.4063	0.0161152	0.0787527	939	999	1060	1645	2151	1022	1034.75	1041.25	1099.51	1627.9	1785.62	1054.01
RLTA1_RS07595	884.493	0.785506	0.326392	2.40664	0.0161002	0.0787527	882	1265	1030	919	881	298	971.936	1318.5	1068.39	909.449	731.347	307.335
RLTA1_RS30215	356.783	0.578777	0.240515	2.40641	0.0161101	0.0787527	462	340	403	285	248	360	509.109	354.379	418.022	282.038	205.873	371.277
RLTA1_RS36145	2756.42	0.680695	0.282788	2.40708	0.0160805	0.0787527	4039	2578	2938	1354	3445	2088	4450.85	2687.03	3047.51	1339.93	2859.81	2153.41
RLTA1_RS23575	160.076	0.58475	0.2432	2.4044	0.0161989	0.0790793	196	184	162	101	133	169	215.986	191.782	168.039	99.9504	110.408	174.294
RLTA1_RS33895	339.59	0.353539	0.147049	2.40423	0.0162066	0.0790793	352	398	328	300	356	293	387.893	414.832	340.226	296.882	295.527	302.178
RLTA1_RS06275	2372.79	0.28879	0.120194	2.40271	0.0162743	0.0791799	2306	2573	2512	2338	2578	1895	2541.14	2681.82	2605.63	2313.7	2140.08	1954.36
RLTA1_RS08320	1028.15	0.351506	0.146288	2.40284	0.0162684	0.0791799	1116	1102	1042	956	1189	753	1229.8	1148.61	1080.84	946.065	987.028	776.588
RLTA1_RS31185	2690.92	-0.456911	0.190169	-2.40266	0.0162764	0.0791799	2120	1997	2301	2806	3112	3860	2336.17	2081.46	2386.77	2776.84	2583.37	3980.92
RLTA1_RS35940	90.7428	-0.662809	0.275816	-2.40308	0.0162576	0.0791799	78	57	63	84	123	144	85.9535	59.4106	65.3483	83.127	102.106	148.511
RLTA1_RS00290	369.259	-0.444885	0.185235	-2.40172	0.016318	0.0792026	270	286	331	402	625	349	297.531	298.095	343.338	397.822	518.833	359.933
RLTA1_RS09595	383.993	-0.57383	0.23892	-2.40176	0.0163163	0.0792026	285	272	317	515	684	291	314.061	283.503	328.816	509.648	567.811	300.116
RLTA1_RS10210	3097.07	0.382628	0.159291	2.40208	0.0163022	0.0792026	3071	3551	3307	2322	3077	3117	3384.14	3701.18	3430.27	2297.87	2554.32	3214.64
RLTA1_RS14385	817.254	0.334766	0.139404	2.4014	0.0163323	0.0792124	790	922	870	774	764	746	870.555	960.993	902.429	765.956	634.222	769.369
RLTA1_RS24000	1605.7	0.348735	0.145296	2.40016	0.0163878	0.0794214	1529	1691	1878	1446	1484	1528	1684.91	1762.52	1948	1430.97	1231.92	1575.87
RLTA1_RS17000	759.532	-0.36117	0.150514	-2.39957	0.0164145	0.0794909	571	629	684	780	971	955	629.224	655.602	709.496	771.894	806.059	984.916
RLTA1_RS20255	15238.5	-0.705945	0.294356	-2.39827	0.0164729	0.0797138	12896	8058	11703	25756	24157	10802	14211	8398.79	12139.2	25488.3	20053.5	11140.4
RLTA1_RS20075	4054.75	-0.515392	0.215007	-2.3971	0.0165256	0.079909	2928	3184	3344	3618	5202	6221	3226.56	3318.66	3468.65	3580.4	4318.35	6415.88
RLTA1_RS25510	1329.62	0.305267	0.127377	2.39656	0.0165497	0.0799653	1300	1410	1453	1324	1417	1049	1432.56	1469.63	1507.16	1310.24	1176.3	1081.86
RLTA1_RS24405	689.162	-0.536657	0.224207	-2.39357	0.0166852	0.0805594	458	565	572	612	905	1058	504.701	588.895	593.321	605.64	751.27	1091.14
RLTA1_RS06115	2588.65	-0.391143	0.163482	-2.39258	0.0167305	0.0807177	2332	1773	2219	3194	3199	2905	2569.79	1847.98	2301.71	3160.81	2655.6	2996
RLTA1_RS23975	411.211	-0.396786	0.165875	-2.39207	0.0167537	0.080769	316	323	367	402	649	451	348.222	336.66	380.68	397.822	538.756	465.128
RLTA1_RS30385	395.257	-0.35661	0.149171	-2.39061	0.0168205	0.0810304	319	322	340	399	531	481	351.528	335.618	352.673	394.853	440.801	496.068
RLTA1_RS17940	928.289	0.423958	0.177417	2.38961	0.0168662	0.0811899	1082	1015	908	826	1103	625	1192.33	1057.93	941.846	817.416	915.637	644.579
RLTA1_RS01255	6269.86	0.407918	0.170821	2.38799	0.0169408	0.0813384	6972	6291	6952	6654	6002	4461	7682.92	6557.06	7211.14	6584.85	4982.46	4600.74
RLTA1_RS06940	374.255	-0.369877	0.154893	-2.38794	0.0169431	0.0813384	311	290	323	463	529	357	342.712	302.265	335.04	458.188	439.14	368.183
RLTA1_RS16655	6770.12	-0.316704	0.132593	-2.38855	0.0169152	0.0813384	6086	5094	5856	7888	9016	7020	6706.58	5309.43	6074.28	7806.02	7484.48	7239.91
RLTA1_RS19865	3992.87	-0.286577	0.120015	-2.38784	0.0169476	0.0813384	3499	3109	3564	4493	5331	4162	3855.79	3240.49	3696.85	4446.31	4425.44	4292.38
RLTA1_RS32890	138.388	0.473916	0.198591	2.38639	0.0170148	0.0815999	152	128	175	126	126	115	167.499	133.413	181.523	124.691	104.597	118.602
RLTA1_RS29230	2180.97	0.645501	0.270548	2.3859	0.0170372	0.0816465	2418	2718	2396	2480	1941	1006	2664.56	2832.95	2485.31	2454.23	1611.29	1037.51
RLTA1_RS21860	2749.15	0.314228	0.131755	2.38495	0.0170815	0.0817979	2501	3196	2945	2286	3024	2502	2756.02	3331.16	3054.77	2262.24	2510.32	2580.38
RLTA1_RS16030	3332.77	-0.440587	0.184768	-2.38455	0.0171002	0.0818269	2863	2272	2854	4711	4249	3223	3154.93	2368.09	2960.38	4662.04	3527.24	3323.96
RLTA1_RS14905	445.949	-0.374451	0.157111	-2.38335	0.0171557	0.0820314	334	393	374	540	661	414	368.057	409.621	387.941	534.388	548.718	426.969
RLTA1_RS03185	198.654	-0.404683	0.169829	-2.38288	0.0171778	0.0820761	133	183	169	228	267	225	146.562	190.739	175.299	225.631	221.646	232.048
RLTA1_RS04410	408.656	-0.452736	0.190042	-2.38229	0.0172053	0.0821463	269	315	396	452	668	402	296.429	328.322	410.761	447.303	554.529	414.593
RLTA1_RS16295	863.31	0.343937	0.144398	2.38187	0.0172248	0.0821783	851	967	918	812	997	631	937.775	1007.9	952.218	803.561	827.643	650.767
RLTA1_RS34775	323.716	0.397891	0.167086	2.38136	0.0172487	0.0822318	379	346	315	272	375	249	417.646	360.633	326.742	269.173	311.3	256.8
RLTA1_RS05155	1397.54	0.319996	0.134481	2.37949	0.0173364	0.0825702	1337	1683	1377	1213	1547	1207	1473.33	1754.18	1428.33	1200.39	1284.22	1244.81
RLTA1_RS10265	2218.57	0.308037	0.129465	2.3793	0.0173454	0.0825702	2386	2191	2363	2151	2431	1746	2629.3	2283.66	2451.08	2128.65	2018.05	1800.69
RLTA1_RS02425	1219.33	-0.264026	0.111028	-2.37801	0.0174061	0.0827982	1001	1093	1043	1401	1588	1248	1103.07	1139.22	1081.88	1386.44	1318.25	1287.09
RLTA1_RS00715	668.88	-0.435687	0.183266	-2.37735	0.0174375	0.0828859	595	453	557	826	774	822	655.671	472.158	577.762	817.416	642.523	847.75
RLTA1_RS19950	1027.69	0.28971	0.121939	2.37587	0.0175077	0.0831584	1039	1096	1064	911	1047	974	1144.94	1142.35	1103.66	901.532	869.149	1004.51
RLTA1_RS18370	862.648	0.406129	0.171005	2.37495	0.0175513	0.0833042	783	1141	865	718	846	789	862.841	1189.25	897.243	710.538	702.293	813.716
RLTA1_RS08990	257.769	0.596996	0.251459	2.37413	0.0175903	0.0834277	261	214	405	245	215	189	287.614	223.05	420.096	242.454	178.479	194.921
RLTA1_RS14305	3252.55	0.516395	0.217659	2.37249	0.0176686	0.0837373	2391	4672	3838	2709	3355	2486	2634.81	4869.59	3981.06	2680.85	2785.1	2563.88
RLTA1_RS03280	309.714	-0.399503	0.168476	-2.37128	0.0177267	0.0838888	238	245	273	325	387	402	262.268	255.362	283.176	321.622	321.261	414.593
RLTA1_RS23245	796.037	0.320128	0.134999	2.37134	0.017724	0.0838888	895	817	785	695	842	715	986.261	851.552	814.261	687.777	698.972	737.398
RLTA1_RS08975	366.939	0.578232	0.244061	2.36921	0.0178262	0.084298	358	315	574	355	313	264	394.504	328.322	595.396	351.311	259.832	272.27
RLTA1_RS05240	747.35	-0.361367	0.15259	-2.36822	0.0178737	0.0843986	566	610	678	721	1077	886	623.714	635.798	703.272	713.507	894.053	913.755
RLTA1_RS15905	4980.58	0.295131	0.124612	2.36841	0.0178647	0.0843986	5278	5120	5122	4663	5757	3902	5816.19	5336.53	5312.92	4614.54	4779.08	4024.23
RLTA1_RS03570	660.823	-0.451047	0.190514	-2.36752	0.0179078	0.0844426	602	441	532	872	770	764	663.385	459.651	551.83	862.938	639.202	787.933
RLTA1_RS06385	961.005	-0.405601	0.171321	-2.36749	0.0179093	0.0844426	779	721	839	922	1285	1267	858.433	751.492	870.274	912.418	1066.72	1306.69
RLTA1_RS15295	219.464	-0.419283	0.177167	-2.3666	0.0179524	0.0845841	155	196	181	288	263	243	170.805	204.289	187.747	285.007	218.325	250.612
RLTA1_RS06670	7515.55	-0.604543	0.255592	-2.36526	0.0180172	0.0848271	6217	4611	6010	11816	11718	5606	6850.93	4806.01	6234.02	11693.2	9727.5	5781.61
RLTA1_RS06685	356.593	0.346287	0.146451	2.36453	0.018053	0.0848871	348	355	428	306	380	314	383.485	370.014	443.954	302.82	315.451	323.836
RLTA1_RS16490	717.767	-0.343663	0.145355	-2.3643	0.0180643	0.0848871	644	594	549	751	971	833	709.667	619.121	569.464	743.195	806.059	859.094
RLTA1_RS32115	765.773	-0.423449	0.179109	-2.36419	0.0180695	0.0848871	654	633	562	895	1243	692	720.687	659.771	582.949	885.699	1031.86	713.677
RLTA1_RS20170	265.897	0.386251	0.163403	2.3638	0.0180886	0.0849146	251	322	281	210	281	243	276.594	335.618	291.474	207.818	233.267	250.612
RLTA1_RS28025	646.203	0.34647	0.146636	2.36279	0.0181378	0.0850838	656	748	643	606	603	589	722.891	779.634	666.968	599.702	500.57	607.451
RLTA1_RS17710	1016.05	0.464805	0.196765	2.36223	0.0181653	0.0851508	1177	975	1177	931	779	964	1297.02	1016.23	1220.87	921.325	646.674	994.198
RLTA1_RS32225	5963.55	-0.688751	0.291699	-2.36117	0.0182173	0.0853323	4680	3426	4793	9479	10420	3928	5157.21	3570.89	4971.66	9380.49	8649.99	4051.05
RLTA1_RS08290	276.551	0.425001	0.18026	2.35771	0.018388	0.0860288	248	354	297	233	257	257	273.288	368.971	308.071	230.579	213.344	265.051
RLTA1_RS20365	2370.06	0.290947	0.123421	2.35735	0.0184061	0.0860288	2298	2519	2570	2214	2307	2221	2532.32	2625.53	2665.8	2190.99	1915.12	2290.57
RLTA1_RS29470	697.469	0.473357	0.200789	2.35749	0.0183989	0.0860288	804	655	833	733	674	453	885.982	682.701	864.05	725.382	559.51	467.191
RLTA1_RS32540	214.649	-0.389373	0.165346	-2.3549	0.0185276	0.0865337	165	191	170	230	278	264	181.825	199.078	176.337	227.61	230.777	272.27
RLTA1_RS19525	649.997	0.312407	0.132756	2.35324	0.0186107	0.0868591	661	638	739	624	659	558	728.401	664.982	766.546	617.515	547.058	575.48
RLTA1_RS05365	631.235	-0.482023	0.204944	-2.35198	0.0186738	0.0870274	542	465	480	898	662	746	597.267	484.666	497.892	888.668	549.548	769.369
RLTA1_RS30260	161.721	0.462679	0.196709	2.3521	0.0186676	0.0870274	142	215	175	128	164	141	156.479	224.093	181.523	126.67	136.142	145.417
RLTA1_RS18490	1024.59	0.376628	0.160153	2.35168	0.0186889	0.0870344	887	1237	1163	832	1195	833	977.445	1289.32	1206.35	823.353	992.009	859.094
RLTA1_RS24645	4071.59	-0.614731	0.26161	-2.3498	0.0187834	0.0874116	3320	2395	3371	6139	6769	2990	3658.53	2496.29	3496.65	6075.2	5619.17	3083.66
RLTA1_RS23650	952.244	-0.298866	0.127254	-2.34857	0.0188456	0.0874479	784	873	760	1103	1296	954	863.943	909.921	788.329	1091.54	1075.85	983.885
RLTA1_RS24150	1022.09	-0.305604	0.130119	-2.34865	0.0188417	0.0874479	877	781	928	1155	1393	1057	966.426	814.03	962.591	1143	1156.38	1090.11
RLTA1_RS24545	279.411	-0.474569	0.201999	-2.34936	0.0188056	0.0874479	223	234	205	339	470	241	245.739	243.896	212.641	335.477	390.163	248.549
RLTA1_RS32090	5941.92	0.620438	0.264162	2.3487	0.0188388	0.0874479	7144	6368	6837	5271	7354	2646	7872.46	6637.31	7091.85	5216.22	6104.8	2728.89
RLTA1_RS06580	809.329	-0.422808	0.180253	-2.34564	0.0189945	0.0880417	675	596	684	778	1064	1094	743.828	621.206	709.496	769.915	883.262	1128.27
RLTA1_RS19135	4184.15	-0.656821	0.280057	-2.34532	0.019011	0.0880417	3332	2639	3202	6926	6747	2818	3671.76	2750.61	3321.35	6854.02	5600.91	2906.28
RLTA1_RS32250	2224.12	-0.653341	0.278581	-2.34524	0.0190146	0.0880417	1884	1308	1685	3492	3732	1555	2076.11	1363.32	1747.81	3455.71	3098.06	1603.71
RLTA1_RS15570	22735.7	-0.361455	0.154347	-2.34183	0.0191894	0.0887873	18711	16502	21102	29065	30388	22028	20618.9	17199.9	21888.6	28762.9	25226.1	22718
RLTA1_RS00055	5357.09	-0.693513	0.296183	-2.3415	0.0192063	0.0888018	4623	3089	3825	8509	9366	3554	5094.4	3219.64	3967.58	8420.57	7775.03	3665.33
RLTA1_RS32865	954.435	-0.800821	0.342053	-2.34122	0.0192209	0.0888054	751	669	543	857	904	1978	827.578	697.293	563.24	848.094	750.44	2039.96
RLTA1_RS28540	647.334	0.369831	0.157993	2.3408	0.0192422	0.08884	705	699	660	642	705	459	776.887	728.562	684.601	635.328	585.244	473.379
RLTA1_RS33825	372.749	0.346446	0.148043	2.34017	0.0192747	0.0889262	354	431	397	344	357	338	390.097	449.228	411.798	340.425	296.357	348.588
RLTA1_RS05345	882.806	-0.315449	0.134842	-2.3394	0.0193146	0.0890466	726	680	821	932	1251	946	800.029	708.758	851.603	922.314	1038.5	975.634
RLTA1_RS32790	661.19	0.293711	0.125566	2.33911	0.0193299	0.0890533	651	753	658	600	715	577	717.381	784.846	682.527	593.764	593.545	595.075
RLTA1_RS25570	2154.27	0.305524	0.130649	2.33851	0.0193609	0.0891321	2305	2380	2048	2037	2366	1746	2540.04	2480.65	2124.34	2015.83	1964.09	1800.69
RLTA1_RS00305	2029.46	0.301239	0.128845	2.33799	0.0193878	0.0891921	2142	2038	2156	1832	1988	1932	2360.42	2124.19	2236.36	1812.96	1650.3	1992.52
RLTA1_RS15005	1068.75	-0.478379	0.204755	-2.33636	0.0194727	0.0895189	935	764	822	1029	1351	1545	1030.34	796.311	852.64	1018.31	1121.51	1593.4
RLTA1_RS16090	4994.56	0.367234	0.157207	2.33599	0.0194917	0.0895422	5644	4933	5321	5164	4935	3762	6219.51	5141.63	5519.34	5110.33	4096.71	3879.85
RLTA1_RS00360	779.721	-0.402215	0.172244	-2.33514	0.019536	0.0896818	630	606	664	815	929	1053	694.24	631.629	688.751	806.53	771.194	1085.99
RLTA1_RS20580	3227.48	-0.489909	0.209952	-2.33343	0.0196255	0.0900283	2620	2261	2710	3977	5611	2634	2887.16	2356.62	2811.02	3935.67	4657.88	2716.51
RLTA1_RS18505	6731.05	-0.337342	0.144597	-2.33297	0.0196495	0.0900743	6102	5128	5567	8085	9401	6533	6724.21	5344.87	5774.51	8000.98	7804.08	6737.65
RLTA1_RS17490	309.31	-0.351193	0.150674	-2.33081	0.0197633	0.0905315	218	284	269	362	412	330	240.229	296.011	279.027	358.238	342.015	340.337
RLTA1_RS25265	733.553	0.377055	0.161803	2.33034	0.0197883	0.0905816	662	858	832	716	798	527	729.503	894.286	863.013	708.559	662.446	543.509
RLTA1_RS01795	19169.6	0.404144	0.173482	2.3296	0.0198271	0.0906944	20795	20364	20603	20371	19350	12880	22915.4	21225.2	21371	20159.3	16063.1	13283.5
RLTA1_RS24260	693.686	-0.283156	0.121586	-2.32884	0.0198674	0.0907837	547	581	645	776	919	731	602.776	605.572	669.042	767.935	762.892	753.899
RLTA1_RS28205	273.759	0.401399	0.17237	2.3287	0.0198748	0.0907837	233	333	319	245	291	217	256.759	347.083	330.891	242.454	241.569	223.798
RLTA1_RS15205	459.928	-0.317604	0.136436	-2.32787	0.0199193	0.0909222	397	403	358	502	633	493	437.481	420.044	371.344	496.783	525.474	508.444
RLTA1_RS01940	1474.74	-0.397466	0.170809	-2.32696	0.0199674	0.0910177	947	1305	1364	1474	2216	1679	1043.56	1360.19	1414.84	1458.68	1839.57	1731.6
RLTA1_RS06785	2419.62	-0.401512	0.172549	-2.32694	0.0199685	0.0910177	2112	1649	2130	3163	3295	2324	2327.36	1718.74	2209.4	3130.13	2735.29	2396.8
RLTA1_RS16100	4956.79	0.286369	0.123143	2.32549	0.0200457	0.0913051	5063	4914	5437	4896	4921	4334	5579.26	5121.82	5639.66	4845.12	4085.08	4469.77
RLTA1_RS20445	717.718	-0.406911	0.17505	-2.32454	0.0200963	0.0914709	600	497	648	724	950	921	661.181	518.019	672.154	716.476	788.626	949.851
RLTA1_RS16470	588.913	0.276368	0.118983	2.32276	0.0201921	0.091842	578	609	640	539	650	509	636.937	634.756	663.856	533.398	539.586	524.945
RLTA1_RS02645	6301.18	-0.444964	0.191712	-2.321	0.0202866	0.092179	6044	3930	5066	7394	8090	7527	6660.29	4096.21	5254.83	7317.16	6715.78	7762.79
RLTA1_RS31985	413.647	0.389554	0.167849	2.32085	0.0202948	0.092179	471	379	476	393	439	311	519.027	395.029	493.743	388.916	364.428	320.742
RLTA1_RS29770	13313.2	-0.665486	0.286913	-2.31947	0.0203697	0.0924536	11394	7556	10081	22715	20141	9495	12555.8	7875.56	10456.8	22478.9	16719.7	9792.44
RLTA1_RS24755	1143.95	0.303325	0.130847	2.31817	0.0204399	0.0927069	1213	1187	1173	1100	1106	1034	1336.69	1237.2	1216.72	1088.57	918.127	1066.39
RLTA1_RS15110	1005.86	0.345887	0.149246	2.31756	0.0204732	0.0927928	1004	1143	1042	883	1222	745	1106.38	1191.34	1080.84	873.823	1014.42	768.338
RLTA1_RS02675	731.068	0.342078	0.147684	2.31628	0.020543	0.0930434	692	818	806	610	712	718	762.562	852.595	836.044	603.661	591.055	740.492
RLTA1_RS05655	11363	-0.538101	0.232405	-2.31536	0.020593	0.0931387	8787	7763	9670	16510	18327	8553	9682.99	8091.31	10030.4	16338.4	15213.8	8820.93
RLTA1_RS28980	1001.87	0.337812	0.145895	2.31545	0.0205884	0.0931387	1031	942	1194	851	1161	823	1136.13	981.839	1238.51	842.156	963.784	848.781
RLTA1_RS02530	223.354	0.395355	0.17089	2.31351	0.0206948	0.0935337	209	246	264	194	206	210	230.311	256.404	273.841	191.984	171.007	216.578
RLTA1_RS06375	1628.65	-0.382969	0.165842	-2.30924	0.0209305	0.0945324	1509	1157	1323	2010	1973	1846	1662.87	1205.93	1372.31	1989.11	1637.85	1903.83
RLTA1_RS18910	266.606	-0.437925	0.189729	-2.30816	0.0209904	0.0947365	235	198	207	322	422	243	258.962	206.374	214.716	318.654	350.316	250.612
RLTA1_RS14175	4036.12	0.64575	0.279842	2.30755	0.0210241	0.0948222	4725	4232	4971	4545	3764	1765	5206.8	4410.98	5156.29	4497.77	3124.62	1820.29
RLTA1_RS02740	307.628	0.343514	0.148953	2.30618	0.0211004	0.0950996	284	342	350	260	348	259	312.959	356.464	363.046	257.298	288.886	267.113
RLTA1_RS14375	2116.99	0.257468	0.111659	2.30584	0.0211198	0.0951203	2100	2286	2139	2010	2184	1924	2314.13	2382.68	2218.73	1989.11	1813.01	1984.27
RLTA1_RS32620	84.238	0.688988	0.299061	2.30384	0.0212316	0.0955569	66	113	117	43	85	78	72.7299	117.779	121.361	42.5531	70.5613	80.4434
RLTA1_RS14195	860.399	-0.41488	0.180145	-2.30303	0.021277	0.0956577	658	665	766	1184	1205	754	725.095	693.124	794.553	1171.7	1000.31	777.62
RLTA1_RS23010	626.024	0.382837	0.166259	2.30265	0.0212986	0.0956577	594	751	663	503	590	624	654.569	782.761	687.713	497.773	489.778	643.547
RLTA1_RS26060	659.119	-0.587757	0.255232	-2.30284	0.0212881	0.0956577	596	432	456	1113	766	618	656.773	450.27	472.997	1101.43	635.882	637.359
RLTA1_RS00230	1499.79	-0.263618	0.114603	-2.30028	0.0214323	0.0961911	1299	1273	1283	1687	1862	1643	1431.46	1326.84	1330.82	1669.47	1545.71	1694.47
RLTA1_RS00285	744.218	-0.35115	0.152685	-2.29984	0.0214573	0.0962366	578	652	622	766	925	948	636.937	679.574	645.185	758.039	767.873	977.697
RLTA1_RS03345	5606.07	-0.288178	0.125322	-2.2995	0.0214766	0.0962482	4822	4320	5136	6233	7084	6248	5313.69	4502.7	5327.44	6168.22	5880.66	6443.72
RLTA1_RS22745	1131.9	-0.401655	0.174689	-2.29927	0.0214899	0.0962482	896	878	986	1348	1229	1466	987.363	915.132	1022.75	1333.99	1020.23	1511.92
RLTA1_RS27825	1671.03	0.296231	0.128912	2.29793	0.0215657	0.0965208	1491	1897	1837	1445	1829	1505	1643.03	1977.23	1905.47	1429.98	1518.31	1552.15
RLTA1_RS35455	1016.67	0.274968	0.119694	2.29725	0.0216043	0.0966265	1046	1039	1064	920	1045	953	1152.66	1082.94	1103.66	910.439	867.489	982.853
RLTA1_RS33295	1335.88	0.293568	0.127834	2.29649	0.0216481	0.0967552	1396	1323	1443	1324	1418	1080	1538.35	1378.95	1496.79	1310.24	1177.13	1113.83
RLTA1_RS21525	5348.58	-0.355608	0.154904	-2.29566	0.0216952	0.0968984	3666	4495	5161	6212	7831	5202	4039.81	4685.1	5353.38	6147.44	6500.77	5364.96
RLTA1_RS05660	959.044	0.384412	0.167536	2.29451	0.0217611	0.0970579	1022	1002	1049	969	1051	644	1126.21	1044.38	1088.1	958.93	872.47	664.174
RLTA1_RS34510	453.742	0.558579	0.243422	2.2947	0.0217505	0.0970579	552	448	527	478	464	235	608.286	466.947	546.644	473.032	385.182	242.362
RLTA1_RS21185	787.79	0.340051	0.148244	2.29386	0.0217984	0.0971337	853	826	810	780	862	580	939.979	860.933	840.193	771.894	715.575	598.169
RLTA1_RS24985	173.654	0.4368	0.190436	2.29369	0.0218083	0.0971337	196	183	185	170	145	150	215.986	190.739	191.896	168.233	120.369	154.699
RLTA1_RS06360	270.791	-0.474698	0.207155	-2.29151	0.0219338	0.0976253	183	230	230	237	422	349	201.66	239.727	238.573	234.537	350.316	359.933
RLTA1_RS09470	391.309	-0.3213	0.140269	-2.2906	0.0219864	0.0976567	318	316	351	470	526	390	350.426	329.364	364.084	465.116	436.65	402.217
RLTA1_RS10620	1033.28	0.26953	0.117668	2.2906	0.0219863	0.0976567	1007	1088	1103	987	1049	935	1109.68	1134.01	1144.11	976.743	870.81	964.29
RLTA1_RS23050	2781.92	-0.463595	0.202346	-2.2911	0.0219577	0.0976567	1937	2260	2436	3237	4897	2333	2134.51	2355.58	2526.8	3203.36	4065.16	2406.08
RLTA1_RS17470	547.683	-0.350571	0.153159	-2.28894	0.0220827	0.0980169	433	413	517	610	677	656	477.152	430.467	536.271	603.661	562	676.55
RLTA1_RS29395	106.174	-0.442496	0.193394	-2.28805	0.0221344	0.0981786	76	89	90	116	145	128	83.7496	92.764	93.3547	114.794	120.369	132.01
RLTA1_RS06760	678.719	-0.370505	0.16195	-2.28777	0.022151	0.0981844	482	597	600	665	914	853	531.148	622.248	622.365	658.089	758.742	879.721
RLTA1_RS14240	7033.95	-0.813745	0.355827	-2.28692	0.0222008	0.0983373	4174	4160	6139	4188	10218	13840	4599.61	4335.93	6367.83	4144.48	8482.3	14273.5
RLTA1_RS00650	3101.19	-0.228032	0.0997716	-2.28554	0.0222811	0.0986252	2604	2779	2703	3306	4028	3318	2869.52	2896.53	2803.75	3271.64	3343.78	3421.94
RLTA1_RS00110	6061.52	0.35096	0.153719	2.28313	0.022423	0.0987807	6309	6296	6624	6412	6046	4479	6952.31	6562.27	6870.91	6345.36	5018.98	4619.31
RLTA1_RS01785	468.931	-0.341185	0.149426	-2.28331	0.0224119	0.0987807	385	353	433	482	651	538	424.258	367.929	449.14	476.991	540.417	554.853
RLTA1_RS05460	4484.74	-0.732505	0.320772	-2.28357	0.0223968	0.0987807	3440	2418	3663	6844	8722	2700	3790.77	2520.26	3799.54	6772.87	7240.42	2784.58
RLTA1_RS08980	216.696	0.578135	0.253188	2.28342	0.0224057	0.0987807	221	175	340	200	206	148	243.535	182.401	352.673	197.921	171.007	152.636
RLTA1_RS10450	1094.7	0.470381	0.206026	2.28311	0.0224237	0.0987807	1068	1565	970	955	959	982	1176.9	1631.19	1006.16	945.075	796.098	1012.76
RLTA1_RS20880	1082.64	-0.408769	0.178999	-2.28363	0.022393	0.0987807	711	1018	912	1049	1506	1374	783.499	1061.05	945.995	1038.1	1250.18	1417.04
RLTA1_RS25450	921.707	0.31996	0.140107	2.28369	0.0223897	0.0987807	894	1026	979	743	961	899	985.159	1069.39	1015.49	735.278	797.758	927.162
RLTA1_RS27720	196.877	0.409793	0.179793	2.27924	0.0226526	0.0997208	177	245	215	166	189	181	195.048	255.362	223.014	164.275	156.895	186.67
RLTA1_RS30910	322.344	0.363006	0.159303	2.27871	0.0226841	0.0997914	317	399	311	283	328	285	349.324	415.874	322.593	280.059	272.284	293.928
RLTA1_RS06350	3690.21	-0.370212	0.162542	-2.27764	0.022748	0.100004	3398	2595	3094	4391	5320	3608	3744.49	2704.75	3209.33	4345.37	4416.31	3721.02
RLTA1_RS13270	898.169	0.383044	0.168209	2.27719	0.0227749	0.100054	850	1037	995	953	831	685	936.673	1080.86	1032.09	943.096	689.841	706.458
RLTA1_RS16310	3542.57	0.244253	0.107318	2.27597	0.0228476	0.100305	3412	3654	3815	3358	4039	2961	3759.91	3808.53	3957.2	3323.1	3352.91	3053.76
RLTA1_RS02485	4007.35	0.263979	0.116023	2.27522	0.0228926	0.100434	3757	4203	4433	3854	4490	3281	4140.09	4380.75	4598.24	3813.95	3727.3	3383.78
RLTA1_RS26810	1989.4	0.330568	0.14545	2.27272	0.023043	0.101025	2089	2033	2149	1752	2437	1483	2302.01	2118.98	2229.1	1733.79	2023.03	1529.46
RLTA1_RS10315	589.874	0.302413	0.133085	2.27233	0.0230666	0.101059	574	671	600	574	620	487	632.53	699.378	622.365	568.035	514.682	502.256
RLTA1_RS08185	2124.99	0.296998	0.130734	2.27177	0.0231007	0.10114	2106	2167	2362	2047	2427	1629	2320.74	2258.65	2450.04	2025.73	2014.73	1680.03
RLTA1_RS07010	4815.46	-0.377147	0.166056	-2.2712	0.0231346	0.10122	4486	3400	3935	5034	6363	5876	4943.43	3543.79	4081.68	4981.68	5282.14	6060.07
RLTA1_RS21890	2585.9	0.290187	0.127857	2.26961	0.023231	0.101527	2297	2968	2806	2340	2903	2186	2531.22	3093.52	2910.59	2315.68	2409.88	2254.48
RLTA1_RS26265	109.559	-0.462705	0.203878	-2.26953	0.0232364	0.101527	76	99	86	116	147	140	83.7496	103.187	89.2056	114.794	122.03	144.386
RLTA1_RS05545	2029.68	0.394614	0.173914	2.26902	0.0232673	0.101585	1823	2690	2028	1623	2047	1897	2008.89	2803.77	2103.59	1606.13	1699.28	1956.42
RLTA1_RS11055	658.436	-0.307328	0.13547	-2.2686	0.0232925	0.101585	551	556	558	674	856	783	607.184	579.514	578.799	666.995	710.594	807.528
RLTA1_RS28200	416.412	0.368307	0.162355	2.26853	0.0232971	0.101585	429	436	463	436	392	324	472.744	454.439	480.258	431.469	325.412	334.15
RLTA1_RS03625	982.193	0.358932	0.158311	2.26726	0.0233744	0.101853	990	1113	1022	1033	977	726	1090.95	1160.07	1060.1	1022.26	811.04	748.742
RLTA1_RS05415	998.456	0.30565	0.134923	2.26536	0.0234905	0.10229	1111	999	1009	927	1124	803	1224.29	1041.25	1046.61	917.366	933.07	828.155
RLTA1_RS08920	165.549	-0.584975	0.258266	-2.26501	0.0235121	0.102311	91	139	147	192	311	143	100.279	144.879	152.479	190.005	258.171	147.48
RLTA1_RS12925	296.776	0.395335	0.174559	2.26477	0.0235271	0.102311	346	284	322	238	289	285	381.281	296.011	334.003	235.527	239.908	293.928
RLTA1_RS07650	13442.4	-0.260506	0.115107	-2.26316	0.0236259	0.102602	11611	10703	12288	14389	18291	14093	12794.9	11155.6	12746	14239.5	15184	14534.5
RLTA1_RS30915	322.199	-0.35568	0.157151	-2.2633	0.0236175	0.102602	286	234	279	362	454	339	315.163	243.896	289.4	358.238	376.88	349.619
RLTA1_RS03890	428.807	0.320895	0.141875	2.26182	0.0237088	0.102754	414	484	452	378	503	341	456.215	504.469	468.848	374.072	417.557	351.682
RLTA1_RS15165	3580.12	-0.274749	0.121451	-2.26223	0.0236835	0.102754	2987	2857	3327	3834	4556	4057	3291.58	2977.83	3451.01	3794.16	3782.09	4184.09
RLTA1_RS30520	101.298	-0.696418	0.307868	-2.26207	0.0236932	0.102754	62	88	69	86	127	180	68.322	91.7217	71.572	85.1062	105.427	185.639
RLTA1_RS31925	100.889	-0.615685	0.272436	-2.25993	0.0238256	0.103191	46	81	100	104	156	130	50.6905	84.4256	103.727	102.919	129.501	134.072
RLTA1_RS07365	404.829	-0.509712	0.225681	-2.25855	0.0239116	0.103494	347	263	333	390	505	603	382.383	274.123	345.413	385.947	419.217	621.889
RLTA1_RS06735	1107.05	-0.323181	0.143151	-2.25762	0.0239691	0.103673	879	888	1019	1095	1644	1205	968.63	925.555	1056.98	1083.62	1364.74	1242.75
RLTA1_RS20480	1571.63	-0.652689	0.289234	-2.25661	0.0240324	0.103877	1341	892	1214	2206	2977	1075	1477.74	929.724	1259.25	2183.07	2471.31	1108.68
RLTA1_RS28095	313.87	0.364454	0.161629	2.25489	0.0241405	0.104274	335	348	317	245	377	259	369.159	362.718	328.816	242.454	312.96	267.113
RLTA1_RS10135	10744.3	-0.786646	0.348953	-2.25431	0.0241769	0.104361	8486	5688	8076	19047	19214	5827	9351.3	5928.56	8377.03	18849.1	15950.2	6009.53
RLTA1_RS33860	258.55	0.359225	0.159422	2.2533	0.0242405	0.104566	266	284	272	210	257	251	293.123	296.011	282.139	207.818	213.344	258.863
RLTA1_RS11370	114.658	-0.509656	0.226435	-2.25079	0.024399	0.105179	86	111	71	141	178	113	94.7692	115.694	73.6465	139.535	147.764	116.54
RLTA1_RS10615	432.24	0.318457	0.14164	2.24836	0.0245532	0.105773	420	470	469	431	453	341	462.826	489.877	486.482	426.521	376.05	351.682
RLTA1_RS16050	3582.45	-0.430722	0.191671	-2.24719	0.024628	0.106024	3004	2717	2905	4605	5707	2952	3310.31	2831.91	3013.28	4557.14	4737.57	3044.47
RLTA1_RS06405	1289.41	-0.259273	0.115445	-2.24586	0.0247131	0.106244	1139	1109	1071	1428	1716	1335	1255.14	1155.9	1110.92	1413.16	1424.51	1376.82
RLTA1_RS06765	672.409	-0.329404	0.146688	-2.24562	0.0247287	0.106244	606	497	581	749	948	696	667.792	518.019	602.657	741.216	786.966	717.803
RLTA1_RS12885	4918.28	0.245811	0.109449	2.2459	0.0247104	0.106244	4564	5401	5158	4518	5627	4226	5029.38	5629.42	5350.26	4471.05	4671.16	4358.38
RLTA1_RS30165	657.975	0.265789	0.118399	2.24485	0.0247776	0.106383	665	701	667	619	717	567	732.809	730.647	691.862	612.567	595.205	584.762
RLTA1_RS06975	190.121	-0.431102	0.192151	-2.24355	0.0248612	0.106596	144	153	161	213	219	255	158.683	159.471	167.001	210.786	181.799	262.988
RLTA1_RS16230	866.71	-0.270379	0.120527	-2.24331	0.0248769	0.106596	689	795	742	933	1204	892	759.256	828.622	769.658	923.304	999.48	919.943
RLTA1_RS27855	688.437	0.323567	0.14423	2.24342	0.0248699	0.106596	650	685	834	624	688	627	716.279	713.97	865.087	617.515	571.132	646.641
RLTA1_RS18350	970.19	0.466028	0.2078	2.24268	0.0249176	0.1067	1108	1127	945	743	784	1027	1220.98	1174.66	980.225	735.278	650.824	1059.17
RLTA1_RS12815	637.935	0.598158	0.266817	2.24183	0.0249726	0.106864	1011	672	473	522	598	494	1114.09	700.42	490.631	516.575	496.42	509.475
RLTA1_RS19695	2161.59	-0.297973	0.132979	-2.24076	0.0250416	0.107017	1878	1676	1929	2283	2761	2522	2069.5	1746.88	2000.9	2259.27	2292	2601
RLTA1_RS25035	290.717	-0.417868	0.186472	-2.24092	0.0250315	0.107017	210	239	257	368	447	254	231.413	249.108	266.58	364.176	371.069	261.957
RLTA1_RS13065	451.961	0.324087	0.144677	2.24008	0.0250859	0.107135	467	522	433	422	495	364	514.619	544.076	449.14	417.614	410.916	375.403
RLTA1_RS32170	773.52	0.330014	0.147449	2.23815	0.0252111	0.107599	802	836	800	793	811	580	883.778	871.356	829.82	784.759	673.238	598.169
RLTA1_RS15915	547.302	-0.381084	0.17045	-2.23576	0.0253677	0.108195	422	496	428	536	712	714	465.03	516.977	443.954	530.43	591.055	736.367
RLTA1_RS12615	800.282	-0.344037	0.153924	-2.23511	0.0254104	0.108306	641	679	676	843	959	1024	706.361	707.716	701.198	834.239	796.098	1056.08
RLTA1_RS28805	205.228	-0.382963	0.171425	-2.23399	0.0254835	0.108545	180	167	156	249	251	235	198.354	174.063	161.815	246.412	208.363	242.362
RLTA1_RS05000	4019.49	-0.335499	0.150335	-2.23167	0.0256367	0.109053	2938	3391	3751	4994	5631	3721	3237.58	3534.41	3890.82	4942.1	4674.48	3837.56
RLTA1_RS20485	3417.32	-0.520352	0.233163	-2.2317	0.0256345	0.109053	2867	2248	2816	4858	5510	2617	3159.34	2343.07	2920.97	4807.51	4574.03	2698.98
RLTA1_RS07440	1048.26	0.249407	0.111773	2.23136	0.0256572	0.109069	1035	1078	1110	957	1115	971	1140.54	1123.59	1151.38	947.054	925.598	1001.42
RLTA1_RS02250	1310.92	0.240557	0.107846	2.23055	0.0257108	0.109089	1281	1342	1397	1229	1398	1192	1411.62	1398.76	1449.07	1216.23	1160.53	1229.34
RLTA1_RS03505	6940.89	0.26571	0.119098	2.23103	0.0256792	0.109089	7071	6994	7378	6976	7421	5669	7792.01	7289.79	7653.01	6903.5	6160.42	5846.59
RLTA1_RS20805	945.486	-0.425184	0.190621	-2.23052	0.0257128	0.109089	678	790	821	1085	1610	815	747.134	823.411	851.603	1073.72	1336.51	840.53
RLTA1_RS35985	177.352	0.36688	0.164508	2.23016	0.0257366	0.109118	178	199	189	143	199	153	196.15	207.416	196.045	141.514	165.196	157.793
RLTA1_RS00330	681.243	0.42318	0.189912	2.22829	0.025861	0.109573	812	723	668	726	633	487	894.798	753.577	692.9	718.455	525.474	502.256
RLTA1_RS10645	267.263	0.324754	0.145832	2.22691	0.0259534	0.109892	258	302	282	229	289	238	284.308	314.772	292.512	226.62	239.908	245.456
RLTA1_RS16105	4082.27	0.256113	0.115102	2.2251	0.0260744	0.110332	4022	4230	4328	4067	4138	3591	4432.11	4408.89	4489.33	4024.73	3435.09	3703.49
RLTA1_RS12860	2675.91	0.69715	0.31355	2.22341	0.0261882	0.110523	2556	3605	3236	2934	2648	992	2816.63	3757.46	3356.62	2903.51	2198.19	1023.08
RLTA1_RS13415	118.162	-0.56133	0.252462	-2.22343	0.0261871	0.110523	68	94	109	114	155	176	74.9338	97.9754	113.063	112.815	128.671	181.513
RLTA1_RS19035	605.624	0.331408	0.149042	2.22359	0.026176	0.110523	576	731	605	591	602	509	634.733	761.915	627.551	584.858	499.74	524.945
RLTA1_RS24900	160.784	-0.477797	0.214864	-2.22372	0.0261673	0.110523	152	111	116	159	238	200	167.499	115.694	120.324	157.348	197.572	206.265
RLTA1_RS07560	1116.54	0.286892	0.129078	2.22262	0.0262413	0.110674	1095	1191	1189	1134	1158	906	1206.65	1241.37	1233.32	1122.21	961.294	934.381
RLTA1_RS30560	109.916	-0.436057	0.196239	-2.22207	0.0262786	0.110759	91	93	80	122	145	134	100.279	96.9331	82.982	120.732	120.369	138.198
RLTA1_RS21245	825.531	-0.358075	0.161193	-2.2214	0.0263237	0.110877	640	740	669	800	1084	1058	705.259	771.296	693.937	791.686	899.864	1091.14
RLTA1_RS29885	103.894	-0.616669	0.277754	-2.2202	0.0264052	0.111147	68	75	90	136	195	78	74.9338	78.1719	93.3547	134.587	161.876	80.4434
RLTA1_RS19365	1323.86	0.248934	0.112193	2.2188	0.0265004	0.111475	1334	1371	1363	1234	1379	1226	1470.03	1428.98	1413.81	1221.18	1144.75	1264.41
RLTA1_RS25850	344.532	0.412835	0.186187	2.21731	0.0266017	0.111828	396	303	413	337	347	257	436.379	315.814	428.395	333.498	288.056	265.051
RLTA1_RS05700	1088.93	0.453686	0.204737	2.21595	0.0266951	0.112147	1251	1105	1202	1029	1300	639	1378.56	1151.73	1246.8	1018.31	1079.17	659.017
RLTA1_RS35130	287.775	-0.330405	0.149136	-2.21547	0.0267281	0.112213	237	241	244	323	420	284	261.166	251.192	253.095	319.643	348.656	292.897
RLTA1_RS10630	1029.17	0.272036	0.122849	2.21439	0.0268021	0.11245	983	1079	1127	968	1034	952	1083.23	1124.63	1169.01	957.94	858.358	981.822
RLTA1_RS22390	19280.7	-0.64335	0.290734	-2.21285	0.0269083	0.112749	16611	11043	14789	30961	31898	13003	18304.8	11510	15340.3	30639.2	26479.6	13410.3
RLTA1_RS33305	686.236	0.279427	0.126269	2.21295	0.0269012	0.112749	637	774	722	615	773	591	701.953	806.734	748.913	608.609	641.693	609.513
RLTA1_RS03765	1619.81	-0.401136	0.181405	-2.21127	0.0270172	0.113131	1238	1232	1485	2036	2514	1385	1364.24	1284.1	1540.35	2014.84	2086.95	1428.39
RLTA1_RS30035	311.156	0.312608	0.141426	2.2104	0.0270775	0.11331	294	353	330	273	341	271	323.979	367.929	342.301	270.163	283.075	279.489
RLTA1_RS27915	11276.7	0.236439	0.10704	2.20889	0.027182	0.113673	10910	11098	12539	10694	12465	9826	12022.5	11567.4	13006.4	10582.9	10347.6	10133.8
RLTA1_RS08885	323.477	-0.676274	0.306207	-2.20855	0.027206	0.1137	234	194	277	501	587	204	257.86	202.205	287.325	495.793	487.288	210.39
RLTA1_RS26385	202.522	0.419765	0.190129	2.20778	0.0272594	0.113849	242	187	226	173	234	149	266.676	194.909	234.424	171.202	194.251	153.668
RLTA1_RS34720	3347.53	0.423764	0.192116	2.20577	0.0274001	0.114362	3433	3550	3880	3148	4059	2029	3783.06	3700.14	4024.63	3115.28	3369.51	2092.56
RLTA1_RS08065	296.069	-0.561639	0.254776	-2.20444	0.0274932	0.114677	191	270	218	284	596	274	210.476	281.419	226.126	281.049	494.759	282.583
RLTA1_RS16275	2359.44	0.283267	0.128569	2.20323	0.0275784	0.114958	2586	2217	2517	2210	2564	2007	2849.69	2310.76	2610.82	2187.03	2128.46	2069.87
RLTA1_RS03320	7163.3	-0.342416	0.15552	-2.20175	0.0276828	0.115279	6530	5184	6124	8762	8627	7947	7195.85	5403.24	6352.27	8670.94	7161.56	8195.95
RLTA1_RS04485	250.97	0.349421	0.15871	2.20163	0.0276913	0.115279	263	277	255	235	235	228	289.818	288.715	264.505	232.558	195.081	235.142
RLTA1_RS32105	1202.01	0.367863	0.167117	2.20124	0.0277194	0.115321	1304	1239	1288	1065	1491	830	1436.97	1291.4	1336.01	1053.93	1237.73	856
RLTA1_RS31300	970.955	-0.403431	0.183332	-2.20055	0.0277682	0.11545	612	929	834	980	1303	1228	674.404	968.289	865.087	969.815	1081.66	1266.47
RLTA1_RS25470	396.401	-0.477568	0.217136	-2.19939	0.0278503	0.115716	333	270	334	359	707	428	366.955	281.419	346.45	355.269	586.904	441.407
RLTA1_RS12245	1023.14	0.411078	0.186984	2.19846	0.027916	0.115765	1080	1107	1119	966	1234	634	1190.13	1153.82	1160.71	955.961	1024.38	653.861
RLTA1_RS19725	1010.97	-0.345946	0.157334	-2.1988	0.0278925	0.115765	923	731	860	1258	1284	1051	1017.12	761.915	892.056	1244.93	1065.89	1083.92
RLTA1_RS29710	569.244	0.342069	0.155588	2.19856	0.0279092	0.115765	524	625	655	509	528	548	577.431	651.432	679.415	503.71	438.31	565.166
RLTA1_RS05275	11899.8	-0.37891	0.172446	-2.19726	0.0280017	0.115933	10901	8089	10214	15379	15456	11937	12012.6	8431.1	10594.7	15219.2	12830.5	12310.9
RLTA1_RS12960	671.569	0.357883	0.16288	2.19722	0.0280047	0.115933	612	828	699	632	616	611	674.404	863.018	725.055	625.432	511.362	630.14
RLTA1_RS32395	279.449	0.435025	0.197996	2.19714	0.0280105	0.115933	341	292	273	277	231	240	375.771	304.349	283.176	274.121	191.761	247.518
RLTA1_RS03540	716.859	-0.275742	0.12575	-2.19279	0.0283227	0.116955	589	595	652	851	915	731	649.059	620.164	676.303	842.156	759.572	753.899
RLTA1_RS11570	7427.8	0.253437	0.115564	2.19305	0.0283038	0.116955	7401	7078	8390	6769	8246	6581	8155.66	7377.34	8702.74	6698.65	6845.28	6787.15
RLTA1_RS15045	6703.53	0.218225	0.0995354	2.19243	0.0283484	0.116955	6693	6668	7041	6378	7512	5861	7375.47	6950	7303.45	6311.72	6235.96	6044.6
RLTA1_RS15115	5627.15	-0.286662	0.130739	-2.19264	0.0283334	0.116955	5067	4377	4882	6665	7042	5926	5583.67	4562.11	5063.98	6595.73	5845.8	6111.64
RLTA1_RS22500	860.525	-0.28759	0.131167	-2.19255	0.0283398	0.116955	760	668	763	929	1126	954	837.496	696.251	791.441	919.345	934.73	983.885
RLTA1_RS22295	940.633	-0.397492	0.181325	-2.19215	0.0283684	0.116963	822	705	766	982	1113	1273	905.818	734.816	794.553	971.795	923.938	1312.88
RLTA1_RS16780	153.384	0.405402	0.185017	2.19116	0.02844	0.117183	149	158	188	127	146	145	164.193	164.682	195.008	125.68	121.199	149.542
RLTA1_RS17410	448.263	-0.565751	0.258471	-2.18884	0.0286087	0.117628	331	293	400	518	883	348	364.751	305.392	414.91	512.617	733.007	358.901
RLTA1_RS19910	640.233	-0.37421	0.170941	-2.18912	0.0285882	0.117628	595	486	493	786	924	604	655.671	506.554	511.377	777.831	767.043	622.921
RLTA1_RS28935	360.15	0.398155	0.181907	2.18878	0.0286128	0.117628	379	441	338	333	312	334	417.646	459.651	350.599	329.539	259.002	344.463
RLTA1_RS33445	1255.81	0.242176	0.11065	2.18867	0.028621	0.117628	1279	1325	1246	1173	1371	1118	1409.42	1381.04	1292.44	1160.81	1138.11	1153.02
RLTA1_RS00410	323.182	-0.370996	0.169598	-2.18751	0.0287054	0.117718	267	242	288	339	403	411	294.225	252.235	298.735	335.477	334.544	423.875
RLTA1_RS16165	1393.43	-0.304113	0.139032	-2.18736	0.0287162	0.117718	1158	1123	1249	1548	2072	1325	1276.08	1170.49	1295.56	1531.91	1720.04	1366.51
RLTA1_RS17265	2039.73	0.270854	0.123803	2.18778	0.0286854	0.117718	1834	2299	2193	1910	2280	1710	2021.01	2396.23	2274.74	1890.15	1892.7	1763.57
RLTA1_RS26195	193.171	0.364181	0.166472	2.18764	0.028696	0.117718	203	218	194	156	201	180	223.699	227.22	201.231	154.379	166.857	185.639
RLTA1_RS34700	1882.5	0.269882	0.123427	2.18656	0.0287745	0.117882	1933	1954	1936	1807	2165	1488	2130.1	2036.64	2008.16	1788.22	1797.24	1534.61
RLTA1_RS22415	363.687	-0.368541	0.168618	-2.18566	0.0288405	0.118077	243	352	306	388	485	430	267.778	366.887	317.406	383.968	402.615	443.47
RLTA1_RS16920	31069	0.243468	0.111443	2.18469	0.0289112	0.118262	32489	30839	31918	29605	32237	28413	35801.8	32143.2	33107.7	29297.3	26761	29303.1
RLTA1_RS24990	806.695	0.380722	0.17428	2.18454	0.0289223	0.118262	929	799	849	846	721	647	1023.73	832.791	880.646	837.208	598.526	667.268
RLTA1_RS27925	894.952	0.290944	0.133242	2.18358	0.0289933	0.118477	897	924	968	771	1087	726	988.465	963.078	1004.08	762.987	902.355	748.742
RLTA1_RS07355	430.025	-0.376761	0.172576	-2.18316	0.0290242	0.118528	371	362	324	453	523	558	408.83	377.31	336.077	448.292	434.16	575.48
RLTA1_RS28900	5388.27	0.260877	0.119527	2.18257	0.0290674	0.118629	5608	5641	5364	4801	6419	4486	6179.84	5879.57	5563.94	4751.11	5328.62	4626.53
RLTA1_RS14755	1598.86	-0.343083	0.157247	-2.18181	0.0291233	0.118782	1307	1215	1468	1974	2298	1457	1440.27	1266.38	1522.72	1953.49	1907.65	1502.64
RLTA1_RS21585	1354.87	-0.366862	0.168171	-2.18149	0.0291474	0.118805	1199	987	1157	1545	1566	1697	1321.26	1028.74	1200.13	1528.94	1299.99	1750.16
RLTA1_RS32450	2458.13	0.283378	0.130001	2.17982	0.029271	0.119233	2557	2633	2444	2305	2882	1918	2817.73	2744.35	2535.1	2281.05	2392.44	1978.08
RLTA1_RS10110	5372.06	0.776087	0.356106	2.17937	0.0293044	0.119293	6082	6395	6731	6343	4734	1625	6702.17	6665.46	6981.9	6277.08	3929.85	1675.9
RLTA1_RS11515	1099.44	0.300408	0.137881	2.17875	0.02935	0.119404	1127	1167	1139	949	1079	1088	1241.92	1216.35	1181.46	939.138	895.714	1122.08
RLTA1_RS10030	4447.92	0.750448	0.344613	2.17766	0.0294317	0.11966	5725	4167	5868	3927	5539	1420	6308.77	4343.23	6086.73	3886.19	4598.11	1464.48
RLTA1_RS36385	149.203	-0.478865	0.220052	-2.17614	0.0295446	0.120044	136	119	97	146	242	170	149.868	124.033	100.616	144.483	200.892	175.325
RLTA1_RS13540	86.9636	-0.482966	0.221964	-2.17588	0.0295643	0.120048	57	76	73	110	132	83	62.8122	79.2142	75.7211	108.857	109.578	85.6
RLTA1_RS16095	2253.63	0.362786	0.166759	2.17551	0.0295917	0.120083	2448	2359	2362	2426	2200	1637	2697.62	2458.77	2450.04	2400.79	1826.29	1688.28
RLTA1_RS15400	904.715	0.284088	0.13065	2.17442	0.0296738	0.12034	853	1005	958	799	1076	740	939.979	1047.5	993.709	790.696	893.223	763.181
RLTA1_RS26260	101.364	-0.47617	0.219111	-2.17319	0.0297659	0.120638	69	92	79	115	122	135	76.0358	95.8908	81.9447	113.805	101.276	139.229
RLTA1_RS27920	2802.73	0.223453	0.102884	2.17189	0.0298638	0.120959	2753	2802	2992	2588	3057	2579	3033.72	2920.5	3103.53	2561.1	2537.72	2659.79
RLTA1_RS04720	1233.56	0.272506	0.125487	2.17159	0.0298864	0.120974	1313	1230	1273	1211	1332	1016	1446.88	1282.02	1320.45	1198.41	1105.74	1047.83
RLTA1_RS01375	1752.57	0.323124	0.148903	2.17004	0.030004	0.121221	1838	1652	2021	1772	1699	1462	2025.42	1721.87	2096.33	1753.58	1410.4	1507.8
RLTA1_RS22375	2321.86	-0.301448	0.138888	-2.17044	0.0299737	0.121221	1863	1980	2047	2323	2945	2858	2052.97	2063.74	2123.3	2298.86	2444.74	2947.53
RLTA1_RS27730	918.776	-0.342742	0.157931	-2.1702	0.0299915	0.121221	732	774	787	983	1071	1184	806.64	806.734	816.335	972.784	889.072	1221.09
RLTA1_RS15885	1018.32	-0.388309	0.179011	-2.16919	0.0300681	0.121404	880	772	840	1175	1120	1330	969.732	804.649	871.311	1162.79	929.749	1371.66
RLTA1_RS12730	91.5892	-0.5782	0.266633	-2.16852	0.030119	0.121533	61	70	77	86	113	146	67.22	72.9604	79.8702	85.1062	93.805	150.574
RLTA1_RS19425	446.595	-0.35771	0.16499	-2.16807	0.0301533	0.121559	339	420	350	438	609	549	373.567	437.763	363.046	433.448	505.551	566.198
RLTA1_RS31760	647.824	0.293947	0.135588	2.16794	0.0301631	0.121559	687	657	674	644	692	518	757.052	684.786	699.123	637.307	574.452	534.227
RLTA1_RS13520	440.985	0.310954	0.143603	2.16537	0.0303594	0.122274	431	461	491	357	473	422	474.948	480.497	509.302	353.29	392.653	435.219
RLTA1_RS24495	458.402	-0.357793	0.165323	-2.1642	0.030449	0.122558	392	322	422	564	564	503	431.971	335.618	437.73	558.139	468.195	518.757
RLTA1_RS16555	501.687	0.28577	0.132109	2.16313	0.030531	0.122811	516	486	558	455	562	426	568.615	506.554	578.799	450.271	466.535	439.345
RLTA1_RS05190	9450.57	-0.634162	0.293211	-2.16282	0.0305553	0.122832	7893	5478	7531	15278	15605	6216	8697.83	5709.67	7811.72	15119.2	12954.2	6410.72
RLTA1_RS08640	960.449	-0.379303	0.175395	-2.16256	0.0305752	0.122835	774	783	805	1030	1085	1298	852.923	816.115	835.006	1019.3	900.694	1338.66
RLTA1_RS21305	1721.84	-0.660964	0.305773	-2.16162	0.0306477	0.12305	1506	872	1383	2437	3253	1179	1659.56	908.878	1434.55	2411.67	2700.42	1215.93
RLTA1_RS11650	890.07	0.334199	0.154736	2.1598	0.0307883	0.123345	893	944	973	740	839	906	984.057	983.923	1009.27	732.31	696.482	934.381
RLTA1_RS14750	12418.7	-0.308131	0.142653	-2.16001	0.030772	0.123345	10502	9421	11472	14292	14680	14438	11572.9	9819.43	11899.6	14143.5	12186.4	14890.3
RLTA1_RS23305	7710.07	-0.459428	0.212719	-2.15978	0.0307894	0.123345	6704	5037	6595	10959	11140	6486	7387.59	5250.02	6840.83	10845.1	9247.68	6689.18
RLTA1_RS34130	2149.24	-0.29049	0.134507	-2.15967	0.030798	0.123345	1889	1733	1844	2197	2762	2548	2081.62	1806.29	1912.74	2174.17	2292.83	2627.82
RLTA1_RS09410	4856.06	-0.23491	0.10881	-2.15891	0.0308572	0.123505	4056	4040	4535	5207	6197	5289	4469.58	4210.86	4704.04	5152.89	5144.33	5454.68
RLTA1_RS06545	88759.3	0.432699	0.20054	2.15767	0.0309536	0.123815	105179	83626	99150	97577	76798	64313	115904	87162.7	102846	96562.9	63752.6	66327.7
RLTA1_RS26000	220.855	-0.362145	0.167862	-2.1574	0.0309749	0.123823	193	165	188	270	273	244	212.68	171.978	195.008	267.194	226.626	251.643
RLTA1_RS12555	1103.83	0.289983	0.134541	2.15534	0.0311351	0.124386	1107	1107	1223	1044	1059	1036	1219.88	1153.82	1268.59	1033.15	879.111	1068.45
RLTA1_RS03430	939.157	-0.692809	0.32163	-2.15406	0.0312358	0.124682	771	506	749	1636	1515	586	849.617	527.4	776.919	1619	1257.65	604.357
RLTA1_RS09760	4021.14	0.243318	0.112966	2.1539	0.0312479	0.124682	4118	4097	4116	3827	4109	3734	4537.9	4270.27	4269.42	3787.23	3411.02	3850.97
RLTA1_RS30010	370.84	0.320119	0.148655	2.15343	0.0312846	0.124751	329	428	411	338	381	329	362.547	446.101	426.32	334.487	316.281	339.306
RLTA1_RS22675	319.724	-0.348134	0.161688	-2.15312	0.031309	0.124766	253	261	282	397	367	366	278.798	272.038	292.512	392.874	304.659	377.465
RLTA1_RS24330	844.685	-0.345912	0.160678	-2.15282	0.0313327	0.124766	671	669	766	840	1068	1085	739.42	697.293	794.553	831.27	886.582	1118.99
RLTA1_RS26895	5331.34	0.452306	0.210117	2.15264	0.0313467	0.124766	5142	5867	6459	5589	5784	3078	5666.32	6115.13	6699.76	5530.92	4801.49	3174.42
RLTA1_RS10980	1625.62	0.306398	0.142382	2.15194	0.0314022	0.12491	1588	1736	1768	1625	1826	1199	1749.92	1809.42	1833.9	1608.11	1515.82	1236.56
RLTA1_RS15860	1121.19	-0.320536	0.149089	-2.14996	0.031558	0.125452	1019	839	959	1279	1608	1100	1122.91	874.483	994.747	1265.71	1334.85	1134.46
RLTA1_RS28860	1286.58	-0.393948	0.18332	-2.14896	0.0316372	0.12569	1093	955	1095	1264	1585	1762	1204.45	995.389	1135.82	1250.86	1315.76	1817.2
RLTA1_RS09185	650.747	-0.639338	0.297593	-2.14837	0.0316846	0.125734	419	288	737	912	806	782	461.725	300.18	764.472	902.522	669.087	806.497
RLTA1_RS18080	534.378	-0.302126	0.140633	-2.14833	0.0316873	0.125734	443	439	472	647	634	586	488.172	457.566	489.594	640.276	526.304	604.357
RLTA1_RS02880	1361.63	0.280696	0.130703	2.14759	0.0317464	0.125872	1295	1581	1355	1297	1380	1222	1427.05	1647.86	1405.51	1283.52	1145.58	1260.28
RLTA1_RS06740	155.601	-0.524237	0.244126	-2.1474	0.0317614	0.125872	105	117	140	128	240	218	115.707	121.948	145.218	126.67	199.232	224.829
RLTA1_RS34990	1261.55	-0.299008	0.139334	-2.14599	0.0318739	0.12624	1070	960	1171	1439	1777	1237	1179.11	1000.6	1214.65	1424.05	1475.15	1275.75
RLTA1_RS28340	890.772	0.32039	0.149571	2.14206	0.0321884	0.127407	849	1034	920	699	958	863	935.571	1077.73	954.293	691.736	795.267	890.034
RLTA1_RS21965	2274.74	0.293202	0.136907	2.14162	0.0322241	0.12747	2034	2437	2635	2252	2304	1932	2241.4	2540.07	2733.22	2228.6	1912.63	1992.52
RLTA1_RS17680	328.417	-0.398513	0.186138	-2.14096	0.0322777	0.127604	284	257	260	430	480	287	312.959	267.869	269.691	425.531	398.464	295.99
RLTA1_RS10990	118.643	-0.606644	0.283509	-2.13977	0.0323733	0.127904	81	108	77	131	121	194	89.2594	112.568	79.8702	129.639	100.446	200.077
RLTA1_RS06880	299.225	0.317719	0.148557	2.1387	0.0324601	0.128089	290	339	311	279	293	272	319.571	353.337	322.593	276.1	243.229	280.521
RLTA1_RS28475	871.548	-0.403286	0.188549	-2.13889	0.0324444	0.128089	757	636	728	1098	1353	744	834.19	662.898	755.136	1086.59	1123.17	767.306
RLTA1_RS19485	1076.96	0.32479	0.151914	2.13798	0.0325182	0.12824	978	1156	1264	913	1313	848	1077.72	1204.89	1311.12	903.512	1089.96	874.564
RLTA1_RS23735	1836.36	0.280136	0.131129	2.13633	0.0326521	0.12862	1926	1800	1971	1758	2111	1438	2122.39	1876.13	2044.47	1739.73	1752.41	1483.05
RLTA1_RS35405	1193.93	0.311832	0.145968	2.1363	0.0326547	0.12862	1132	1238	1379	1063	1449	912	1247.43	1290.36	1430.4	1051.95	1202.86	940.569
RLTA1_RS10200	1420.23	-0.253441	0.118693	-2.13527	0.0327393	0.128703	1101	1277	1295	1477	1954	1503	1213.27	1331.01	1343.27	1461.65	1622.08	1550.08
RLTA1_RS23690	1460.76	-0.259099	0.121354	-2.13507	0.0327555	0.128703	1183	1309	1274	1494	1884	1680	1303.63	1364.36	1321.49	1478.47	1563.97	1732.63
RLTA1_RS32750	135.828	0.387786	0.181627	2.13507	0.0327556	0.128703	138	150	148	104	146	125	152.072	156.344	153.517	102.919	121.199	128.916
RLTA1_RS33865	316.129	0.324147	0.151805	2.13529	0.0327375	0.128703	326	339	329	310	298	280	359.242	353.337	341.263	306.778	247.38	288.771
RLTA1_RS14880	4065.52	0.621257	0.291032	2.13467	0.0327882	0.128752	4884	3818	5227	4054	4655	1681	5382.01	3979.47	5421.84	4011.87	3864.27	1733.66
RLTA1_RS20610	998.062	-0.402326	0.188552	-2.13376	0.0328622	0.128964	863	722	845	1256	1550	852	950.998	752.535	876.497	1242.95	1286.71	878.69
RLTA1_RS22615	4651.18	0.241225	0.113085	2.13313	0.0329137	0.129087	4273	4945	5065	4272	4912	4349	4708.71	5154.13	5253.8	4227.6	4077.61	4485.24
RLTA1_RS04855	217.931	-0.445676	0.209042	-2.13199	0.0330075	0.129298	155	214	154	205	321	276	170.805	223.05	159.74	202.87	266.473	284.646
RLTA1_RS22665	6110.34	0.341917	0.160366	2.1321	0.0329987	0.129298	6924	6239	6131	6073	5397	5507	7630.03	6502.86	6359.53	6009.89	4480.23	5679.51
RLTA1_RS12905	183.549	0.533374	0.25027	2.1312	0.033073	0.129397	209	220	184	155	121	191	230.311	229.304	190.859	153.389	100.446	196.983
RLTA1_RS21335	526.419	0.262937	0.123366	2.13135	0.0330606	0.129397	522	554	550	489	597	442	575.227	577.43	570.501	483.918	495.589	455.846
RLTA1_RS20410	741.369	-0.54811	0.257245	-2.1307	0.0331142	0.129479	589	493	621	1078	1248	522	649.059	513.85	644.148	1066.8	1036.01	538.352
RLTA1_RS30805	325.35	-0.31574	0.148321	-2.12875	0.0332746	0.130028	251	297	273	341	422	383	276.594	309.561	283.176	337.456	350.316	394.998
RLTA1_RS34015	112.185	-0.590397	0.277391	-2.12839	0.0333046	0.130066	63	93	98	142	110	168	69.424	96.9331	101.653	140.524	91.3146	173.263
RLTA1_RS09175	485.983	-0.653541	0.307419	-2.1259	0.0335119	0.130717	325	206	540	648	564	653	358.14	214.712	560.128	641.266	468.195	673.456
RLTA1_RS12225	261.376	-0.413732	0.194605	-2.12601	0.0335027	0.130717	188	213	234	263	319	360	207.17	222.008	242.722	260.267	264.812	371.277
RLTA1_RS16640	1068.64	-0.550287	0.259028	-2.12443	0.0336345	0.131115	856	721	875	1405	1981	751	943.284	751.492	907.616	1390.4	1644.49	774.526
RLTA1_RS26200	371.987	-0.332814	0.156738	-2.12337	0.0337229	0.131381	276	364	293	408	481	428	304.143	379.394	303.922	403.76	399.294	441.407
RLTA1_RS03335	240.312	-0.382484	0.180153	-2.12311	0.0337446	0.131385	167	180	245	270	332	265	184.029	187.613	254.132	267.194	275.604	273.301
RLTA1_RS18300	938.943	0.309301	0.14572	2.12257	0.03379	0.131483	842	1088	1017	838	921	895	927.857	1134.01	1054.91	829.291	764.553	923.037
RLTA1_RS02390	439.17	-0.34372	0.161988	-2.12188	0.0338478	0.131548	377	368	349	447	552	556	415.442	383.563	362.009	442.355	458.233	573.417
RLTA1_RS06620	975.641	0.444099	0.209287	2.12196	0.0338409	0.131548	1041	937	1205	1090	877	653	1147.15	976.627	1249.92	1078.67	728.027	673.456
RLTA1_RS00535	470.468	-0.283866	0.133801	-2.12156	0.0338747	0.131573	415	384	401	518	650	482	457.317	400.24	415.947	512.617	539.586	497.099
RLTA1_RS30775	258.825	0.491826	0.231868	2.12114	0.0339097	0.13163	339	197	317	233	256	196	373.567	205.331	328.816	230.579	212.514	202.14
RLTA1_RS19795	436.38	0.445327	0.210043	2.12017	0.0339921	0.131791	442	507	477	421	521	251	487.07	528.442	494.78	416.625	432.499	258.863
RLTA1_RS23640	875.615	0.354897	0.167377	2.12034	0.0339773	0.131791	811	1148	827	763	905	775	893.696	1196.55	857.826	755.071	751.27	799.277
RLTA1_RS00395	2573.35	-0.243158	0.114775	-2.11856	0.0341273	0.132235	2075	2294	2308	2757	3625	2551	2286.58	2391.02	2394.03	2728.35	3009.23	2630.91
RLTA1_RS16525	1347.24	-0.392427	0.185257	-2.11828	0.0341515	0.13225	1177	895	1220	1817	1675	1357	1297.02	932.851	1265.48	1798.12	1390.47	1399.51
RLTA1_RS31695	646.422	-0.329847	0.155769	-2.11754	0.0342137	0.132411	526	583	512	846	806	634	579.635	607.656	531.085	837.208	669.087	653.861
RLTA1_RS14985	4557.87	0.292525	0.138177	2.11703	0.0342574	0.1325	3911	5226	5108	4104	5174	3816	4309.8	5447.02	5298.4	4061.35	4295.11	3935.54
RLTA1_RS15220	525.07	0.458349	0.216541	2.11668	0.0342866	0.132534	589	585	545	506	628	295	649.059	609.741	565.315	500.741	521.324	304.241
RLTA1_RS19420	332.579	0.39919	0.188769	2.1147	0.0344551	0.133105	279	384	412	247	383	289	307.449	400.24	427.357	244.433	317.941	298.053
RLTA1_RS16325	2591.05	-0.25546	0.120878	-2.11338	0.0345687	0.133384	2348	2114	2214	2778	3535	2691	2587.42	2203.4	2296.53	2749.13	2934.52	2775.3
RLTA1_RS21660	521.959	-0.278083	0.131577	-2.11347	0.034561	0.133384	457	444	433	613	672	535	503.599	462.778	449.14	606.629	557.849	551.759
RLTA1_RS16115	680.524	0.268802	0.127239	2.11257	0.0346379	0.133571	633	757	718	589	772	609	697.546	789.015	744.763	582.879	640.863	628.077
RLTA1_RS08575	1992.04	-0.25072	0.118734	-2.11161	0.03472	0.133807	1669	1633	1848	2055	2635	2204	1839.18	1702.06	1916.88	2033.64	2187.4	2273.04
RLTA1_RS29650	3088.47	-0.363536	0.172331	-2.10951	0.0349002	0.134421	2441	2508	2700	4026	4509	2617	2689.9	2614.07	2800.64	3984.16	3743.07	2698.98
RLTA1_RS01735	569.612	-0.436154	0.206876	-2.10828	0.0350065	0.134428	408	469	495	550	675	835	449.603	488.835	513.451	544.284	560.34	861.157
RLTA1_RS03640	419.167	0.45439	0.215484	2.1087	0.0349707	0.134428	392	476	506	332	327	448	431.971	496.131	524.861	328.55	271.454	462.034
RLTA1_RS13570	688.03	-0.304417	0.144364	-2.10868	0.0349723	0.134428	619	513	608	732	943	750	682.118	534.696	630.663	724.393	782.815	773.494
RLTA1_RS14965	2828.51	0.24288	0.115202	2.1083	0.035005	0.134428	2610	3106	2974	2483	3265	2526	2876.14	3237.36	3084.86	2457.2	2710.38	2605.13
RLTA1_RS31655	475.727	-0.48452	0.22975	-2.1089	0.0349535	0.134428	345	422	357	590	844	368	380.179	439.847	370.307	583.868	700.632	379.528
RLTA1_RS19175	5587.92	-0.282472	0.134049	-2.10724	0.0350972	0.134696	5079	4617	4550	5912	8104	5644	5596.89	4812.26	4719.6	5850.56	6727.4	5820.8
RLTA1_RS26715	1071.33	-0.251915	0.119563	-2.10696	0.0351209	0.134707	842	965	964	1134	1363	1203	927.857	1005.81	999.933	1122.21	1131.47	1240.68
RLTA1_RS21950	1913.19	0.332627	0.157951	2.10589	0.0352143	0.134904	1694	2320	2037	1545	1971	1858	1866.73	2418.12	2112.93	1528.94	1636.19	1916.2
RLTA1_RS29000	126.576	0.402477	0.19111	2.106	0.0352045	0.134904	113	156	140	106	136	106	124.522	162.598	145.218	104.898	112.898	109.321
RLTA1_RS29205	3671.74	0.539048	0.256052	2.10523	0.0352716	0.135043	3121	4919	4322	4163	3349	2018	3439.24	5127.03	4483.1	4119.74	2780.12	2081.22
RLTA1_RS17420	402.971	0.289534	0.137664	2.1032	0.0354482	0.135558	411	399	444	375	407	368	452.909	415.874	460.55	371.103	337.864	379.528
RLTA1_RS36180	281.218	-0.353628	0.168137	-2.10321	0.0354472	0.135558	214	230	255	329	324	342	235.821	239.727	264.505	325.581	268.963	352.713
RLTA1_RS22505	642.069	-0.420341	0.199894	-2.10282	0.0354817	0.135606	524	493	537	779	1073	526	577.431	513.85	557.017	770.904	890.733	542.477
RLTA1_RS21600	5941.27	-0.504453	0.240182	-2.10029	0.0357034	0.136372	5591	3519	4734	8719	8551	5024	6161.1	3667.82	4910.46	8628.39	7098.47	5181.38
RLTA1_RS16465	3802.38	0.551078	0.262482	2.09949	0.0357737	0.13656	4644	3646	4476	3263	4969	1842	5117.54	3800.2	4642.84	3229.09	4124.93	1899.7
RLTA1_RS15195	1488.74	-0.254276	0.121193	-2.0981	0.0358962	0.136946	1242	1345	1257	1595	2117	1476	1368.64	1401.88	1303.85	1578.42	1757.39	1522.24
RLTA1_RS08075	4355.38	0.360365	0.171804	2.09753	0.0359466	0.137057	4698	4565	4584	4568	4703	2926	5177.04	4758.06	4754.87	4520.53	3904.12	3017.66
RLTA1_RS23660	7303.3	0.326691	0.155914	2.09533	0.036142	0.137721	7726	7887	7370	7117	6371	6893	8513.8	8220.56	7644.72	7043.04	5288.78	7108.93
RLTA1_RS20825	873.927	-0.40666	0.194135	-2.09473	0.0361954	0.137842	884	594	638	977	1193	1000	974.14	619.121	661.781	966.847	990.349	1031.33
RLTA1_RS01775	1400.58	-0.352394	0.168649	-2.08951	0.0366615	0.139535	1269	1023	1182	1587	1626	1738	1398.4	1066.26	1226.06	1570.51	1349.8	1792.44
RLTA1_RS03340	1771.12	-0.366686	0.1756	-2.08819	0.0367806	0.139905	1311	1486	1589	1571	2590	2211	1444.68	1548.85	1648.23	1554.67	2150.04	2280.26
RLTA1_RS12810	334.359	0.370761	0.177619	2.0874	0.0368517	0.140012	334	410	324	246	379	307	368.057	427.34	336.077	243.443	314.62	316.617
RLTA1_RS30340	4120.68	-0.544711	0.260952	-2.0874	0.0368522	0.140012	3957	2273	3207	5695	6747	3327	4360.49	2369.13	3326.54	5635.81	5600.91	3431.22
RLTA1_RS27245	1529.17	0.454965	0.218002	2.08698	0.0368899	0.140073	1191	2115	1724	1082	1804	1262	1312.44	2204.45	1788.26	1070.76	1497.56	1301.53
RLTA1_RS33710	477.513	-0.361195	0.173157	-2.08594	0.0369838	0.140347	392	404	386	542	530	616	431.971	421.086	400.388	536.367	439.971	635.297
RLTA1_RS33145	1242.18	0.237623	0.113972	2.08492	0.0370763	0.140615	1223	1270	1313	1167	1440	1037	1347.71	1323.71	1361.94	1154.87	1195.39	1069.48
RLTA1_RS29870	211.017	0.345238	0.165627	2.08443	0.0371211	0.140701	234	227	206	188	207	194	257.86	236.6	213.679	186.046	171.838	200.077
RLTA1_RS08740	283.772	-0.427362	0.205075	-2.08393	0.0371667	0.140714	254	215	214	276	358	394	279.9	224.093	221.977	273.132	297.188	406.342
RLTA1_RS15090	149.94	-0.442899	0.212557	-2.08367	0.0371901	0.140714	121	125	113	163	171	209	133.338	130.286	117.212	161.306	141.953	215.547
RLTA1_RS24055	334.372	-0.341719	0.163981	-2.0839	0.0371693	0.140714	233	296	308	334	472	387	256.759	308.518	319.481	330.529	391.823	399.123
RLTA1_RS05315	131.312	-0.433537	0.208146	-2.08285	0.0372645	0.140742	81	114	122	156	160	161	89.2594	118.821	126.548	154.379	132.821	166.043
RLTA1_RS08870	1119.06	0.37821	0.181549	2.08324	0.0372294	0.140742	1220	1261	1096	1060	1343	732	1344.4	1314.33	1136.85	1048.98	1114.87	754.93
RLTA1_RS24345	1813.01	0.236632	0.113596	2.0831	0.0372425	0.140742	1810	1827	1914	1794	1985	1523	1994.56	1904.27	1985.34	1775.36	1647.81	1570.71
RLTA1_RS32635	734.318	0.314838	0.151173	2.08263	0.0372848	0.140742	634	858	819	611	838	643	698.648	894.286	849.528	604.65	695.651	663.142
RLTA1_RS30760	353.069	0.652003	0.313173	2.08193	0.037349	0.140901	517	268	429	270	214	368	569.717	279.334	444.991	267.194	177.648	379.528
RLTA1_RS02905	9180.55	0.359426	0.172747	2.08065	0.0374663	0.141179	10345	8858	9952	9212	10336	6236	11399.9	9232.62	10323	9116.26	8580.26	6431.35
RLTA1_RS30995	673.378	0.26587	0.127779	2.08071	0.0374602	0.141179	722	681	675	621	707	614	795.621	709.801	700.161	614.546	586.904	633.234
RLTA1_RS20070	12779.7	-0.350251	0.168379	-2.08014	0.0375127	0.141271	11354	8953	11438	16651	15508	13205	12511.7	9331.64	11864.4	16478	12873.7	13618.7
RLTA1_RS15555	3993.75	-0.397369	0.19116	-2.07872	0.0376429	0.141595	3472	2847	3421	5450	5668	3415	3826.03	2967.4	3548.52	5393.36	4705.19	3521.98
RLTA1_RS18565	5206.71	-0.437132	0.210282	-2.07879	0.0376368	0.141595	4873	3293	4309	7406	6642	4970	5369.89	3432.27	4469.62	7329.03	5513.74	5125.69
RLTA1_RS04785	2030.58	0.22934	0.110383	2.07767	0.0377397	0.141877	1991	2049	2164	1859	2153	1922	2194.02	2135.66	2244.66	1839.68	1787.28	1982.21
RLTA1_RS23055	778.178	-0.356696	0.171701	-2.07742	0.0377626	0.14188	596	654	683	753	974	1036	656.773	681.659	708.459	745.174	808.55	1068.45
RLTA1_RS19110	1846.12	-0.267715	0.128927	-2.07649	0.0378487	0.142076	1637	1449	1650	2071	2276	2048	1803.92	1510.28	1711.5	2049.48	1889.38	2112.16
RLTA1_RS28515	1078.94	0.334689	0.161189	2.07638	0.037859	0.142076	940	1324	1152	856	1248	950	1035.85	1379.99	1194.94	847.104	1036.01	979.759
RLTA1_RS30440	181.694	-0.459946	0.221544	-2.07609	0.0378854	0.142092	130	149	155	237	296	146	143.256	155.301	160.778	234.537	245.719	150.574
RLTA1_RS33670	23786.7	0.337894	0.162832	2.07511	0.0379765	0.142351	24199	25768	25215	24793	26106	16323	26666.5	26857.8	26154.9	24535.3	21671.5	16834.3
RLTA1_RS12475	356.883	0.310528	0.149684	2.07456	0.0380274	0.142459	362	417	339	320	369	323	398.912	434.636	351.636	316.674	306.319	333.118
RLTA1_RS02845	2891.52	-0.553502	0.266848	-2.07422	0.0380588	0.142493	1795	2582	2276	2678	3122	4923	1978.03	2691.2	2360.84	2650.17	2591.68	5077.22
RLTA1_RS05105	247.147	-0.307446	0.148283	-2.07338	0.0381373	0.142655	201	213	211	280	308	279	221.496	222.008	218.865	277.09	255.681	287.74
RLTA1_RS25030	334.944	-0.30697	0.14806	-2.07328	0.0381463	0.142655	254	298	297	390	471	324	279.9	310.603	308.071	385.947	390.993	334.15
RLTA1_RS02950	640.629	-0.316121	0.152534	-2.07246	0.0382227	0.142775	526	599	490	636	879	749	579.635	624.333	508.265	629.39	729.687	772.463
RLTA1_RS09190	1589.16	-0.462453	0.223133	-2.07254	0.0382148	0.142775	1063	1024	1707	2060	1814	1921	1171.39	1067.31	1770.63	2038.59	1505.86	1981.18
RLTA1_RS05330	5478.08	0.336433	0.162481	2.07061	0.0383957	0.143255	5963	5292	6030	5851	5304	4202	6571.03	5515.81	6254.77	5790.19	4403.03	4333.63
RLTA1_RS28235	2284.28	0.247043	0.119306	2.07068	0.038389	0.143255	2181	2464	2377	2190	2293	2131	2403.39	2568.21	2465.6	2167.24	1903.5	2197.76
RLTA1_RS02360	773.475	-0.308905	0.149218	-2.07016	0.0384374	0.14328	645	676	634	740	1057	929	710.769	704.589	657.632	732.31	877.451	958.102
RLTA1_RS12360	5572.58	-0.578794	0.279603	-2.07006	0.0384471	0.14328	4288	3440	4915	8115	9865	3691	4725.24	3585.48	5098.21	8030.66	8189.26	3806.62
RLTA1_RS05890	3541.62	-0.475228	0.229616	-2.06967	0.0384835	0.143333	3172	2437	2753	4909	5645	2729	3495.44	2540.07	2855.62	4857.98	4686.1	2814.49
RLTA1_RS10310	1649.21	-0.240665	0.11638	-2.06792	0.0386479	0.143862	1391	1399	1490	1817	2284	1614	1532.84	1458.17	1545.54	1798.12	1896.02	1664.56
RLTA1_RS01485	95.1578	-0.426233	0.206321	-2.06587	0.0388405	0.14446	66	88	76	111	122	113	72.7299	91.7217	78.8329	109.846	101.276	116.54
RLTA1_RS07330	1287.44	-0.398967	0.193158	-2.0655	0.0388758	0.14446	1163	928	1044	1833	1627	1191	1281.59	967.247	1082.92	1813.95	1350.63	1228.31
RLTA1_RS09405	7464.39	-0.230631	0.111648	-2.0657	0.0388567	0.14446	6547	6108	6774	7822	9945	7934	7214.58	6366.32	7026.5	7740.71	8255.67	8182.54
RLTA1_RS01010	848.444	-0.290762	0.140834	-2.06457	0.038964	0.144704	741	673	744	1050	1080	839	816.558	701.462	771.733	1039.09	896.544	865.282
RLTA1_RS19660	1112.54	-0.266696	0.129335	-2.06205	0.0392028	0.145507	934	952	973	1127	1623	1146	1029.24	992.262	1009.27	1115.29	1347.31	1181.9
RLTA1_RS26555	1056.58	-0.697979	0.338556	-2.06164	0.0392422	0.145569	847	650	778	1883	1765	575	933.367	677.49	807	1863.43	1465.18	593.012
RLTA1_RS01960	10021.2	0.383754	0.186328	2.05957	0.0394401	0.146219	10375	9728	12019	9994	11539	6418	11432.9	10139.4	12467	9890.14	9578.91	6619.05
RLTA1_RS25540	148.412	-0.375384	0.18231	-2.05904	0.0394901	0.14632	106	136	124	166	186	179	116.809	141.752	128.622	164.275	154.405	184.607
RLTA1_RS15365	309.685	-0.439848	0.213755	-2.05772	0.0396168	0.146621	273	240	229	464	380	286	300.837	250.15	237.536	459.178	315.451	294.959
RLTA1_RS25555	126.16	-0.410125	0.199296	-2.05786	0.0396032	0.146621	112	102	92	128	175	155	123.42	106.314	95.4293	126.67	145.273	159.855
RLTA1_RS11180	480.692	0.266078	0.129333	2.0573	0.0396572	0.146686	467	490	530	431	555	409	514.619	510.723	549.756	426.521	460.724	421.812
RLTA1_RS35025	4684.3	-0.429425	0.208787	-2.05676	0.0397091	0.146794	3821	3416	4055	6341	7309	3671	4210.62	3560.47	4206.15	6275.1	6067.44	3786
RLTA1_RS34140	323.433	-0.373805	0.181912	-2.05487	0.0398919	0.147385	226	286	287	316	419	422	249.045	298.095	297.698	312.716	347.826	435.219
RLTA1_RS03270	1116.08	0.337364	0.164271	2.05371	0.0400042	0.147715	918	1238	1384	953	1176	1008	1011.61	1290.36	1435.59	943.096	976.236	1039.58
RLTA1_RS07505	389.862	0.308452	0.150237	2.05311	0.0400623	0.147845	402	447	371	371	386	347	442.991	465.904	384.829	367.144	320.431	357.87
RLTA1_RS12275	1375.96	0.501868	0.244681	2.05111	0.0402561	0.148474	1813	1202	1531	1530	1240	847	1997.87	1252.83	1588.07	1514.1	1029.36	873.533
RLTA1_RS26235	1903.67	0.271022	0.132162	2.05068	0.0402977	0.148543	2038	1868	1979	1919	1923	1630	2245.81	1947	2052.77	1899.06	1596.35	1681.06
RLTA1_RS09380	2218.45	0.399125	0.194724	2.0497	0.0403937	0.148812	1864	2987	2316	1685	2231	2154	2054.07	3113.33	2402.33	1667.49	1852.03	2221.48
RLTA1_RS06260	702.595	-0.304092	0.148572	-2.04676	0.0406813	0.149529	616	567	594	795	820	836	678.812	590.979	616.141	786.738	680.709	862.188
RLTA1_RS15660	515.343	0.322774	0.157663	2.04724	0.040635	0.149529	473	583	568	398	562	498	521.231	607.656	589.172	393.864	466.535	513.6
RLTA1_RS18305	9593.81	0.290547	0.141954	2.04678	0.0406802	0.149529	10209	9354	10286	9326	8942	8961	11250	9749.6	10669.4	9229.08	7423.05	9241.71
RLTA1_RS35135	234.405	-0.318302	0.155466	-2.0474	0.0406188	0.149529	181	212	198	243	314	271	199.456	220.966	205.38	240.475	260.662	279.489
RLTA1_RS35030	940.076	0.374808	0.183196	2.04594	0.0407621	0.14974	1033	929	1040	892	1135	611	1138.33	968.289	1078.77	882.73	942.201	630.14
RLTA1_RS32050	105.822	0.414252	0.202538	2.0453	0.0408252	0.149887	99	132	112	83	117	90	109.095	137.583	116.175	82.1374	97.1256	92.8193
RLTA1_RS27165	125.985	-0.395115	0.193388	-2.04313	0.0410399	0.150589	87	115	107	143	190	126	95.8712	119.864	110.988	141.514	157.725	129.947
RLTA1_RS04865	406.977	0.30699	0.150381	2.04141	0.0412101	0.151059	438	373	462	365	452	344	482.662	388.775	479.221	361.207	375.22	354.776
RLTA1_RS22685	6786.64	-0.343802	0.168418	-2.04136	0.041215	0.151059	5863	5018	6030	8718	9540	6038	6460.84	5230.22	6254.77	8627.4	7919.47	6227.14
RLTA1_RS07685	2040.3	-0.314322	0.154105	-2.03966	0.0413844	0.151593	1866	1498	1773	2128	2619	2429	2056.27	1561.35	1839.09	2105.88	2174.12	2505.09
RLTA1_RS19730	1003.78	0.366426	0.179766	2.03835	0.041515	0.151937	1159	895	1139	1038	942	797	1277.18	932.851	1181.46	1027.21	781.985	821.967
RLTA1_RS27965	776.344	0.38942	0.191056	2.03825	0.0415254	0.151937	684	901	915	747	912	504	753.746	939.105	949.107	739.237	757.081	519.788
RLTA1_RS04335	607.762	-0.347561	0.170623	-2.03701	0.0416492	0.152024	466	528	522	730	934	527	513.517	550.33	541.458	722.413	775.344	543.509
RLTA1_RS10455	304.587	0.443378	0.217621	2.03738	0.0416115	0.152024	252	439	306	245	291	282	277.696	457.566	317.406	242.454	241.569	290.834
RLTA1_RS10970	3855.93	-0.3572	0.175371	-2.03683	0.0416672	0.152024	3352	2815	3389	5231	5037	3524	3693.8	2934.05	3515.32	5176.64	4181.38	3634.39
RLTA1_RS13320	2506.65	-0.510105	0.25044	-2.03683	0.041667	0.152024	2304	1406	2121	3744	3560	2109	2538.93	1465.46	2200.06	3705.09	2955.27	2175.07
RLTA1_RS27555	7624.71	-0.688034	0.337736	-2.03719	0.0416307	0.152024	6325	3942	6211	11670	14677	4358	6969.95	4108.71	6442.51	11548.7	12183.9	4494.52
RLTA1_RS07240	4320.29	0.254239	0.124951	2.03471	0.0418805	0.152629	4180	4552	4578	3652	4588	4266	4606.23	4744.51	4748.64	3614.05	3808.65	4399.64
RLTA1_RS25735	303.019	0.329133	0.161758	2.03472	0.0418792	0.152629	300	362	294	261	357	243	330.59	377.31	304.959	258.288	296.357	250.612
RLTA1_RS19875	2181.96	0.262622	0.12924	2.03206	0.042148	0.153517	2083	2477	2181	1902	2284	2108	2295.4	2581.76	2262.3	1882.23	1896.02	2174.03
RLTA1_RS00080	16291.2	-0.367384	0.180976	-2.03002	0.0423548	0.154183	13214	12285	14768	21563	23527	13762	14561.4	12804.6	15318.5	21338.9	19530.5	14193.1
RLTA1_RS31815	168.176	0.331934	0.16368	2.02794	0.0425662	0.154865	165	190	176	154	183	138	181.825	198.035	182.56	152.4	151.914	142.323
RLTA1_RS06730	305.792	-0.34107	0.168519	-2.02392	0.0429785	0.156198	219	282	264	304	406	376	241.331	293.926	273.841	300.841	337.034	387.778
RLTA1_RS23485	272.921	-0.332982	0.16454	-2.02371	0.0429995	0.156198	237	242	204	332	373	266	261.166	252.235	211.604	328.55	309.64	274.333
RLTA1_RS26125	293.731	-0.432737	0.213839	-2.02366	0.0430055	0.156198	256	189	261	417	340	308	282.104	196.993	270.729	412.666	282.245	317.648
RLTA1_RS08115	228.824	-0.365072	0.180546	-2.02204	0.0431721	0.156653	179	197	190	228	287	300	197.252	205.331	197.082	225.631	238.248	309.398
RLTA1_RS17755	280.351	-0.284548	0.140728	-2.02197	0.0431795	0.156653	223	244	249	300	375	306	245.739	254.319	258.281	296.882	311.3	315.586
RLTA1_RS21835	592.586	-0.269104	0.133132	-2.02133	0.0432452	0.156803	515	508	497	711	760	590	567.513	529.484	515.526	703.611	630.901	608.482
RLTA1_RS07045	1270.69	-0.299743	0.148389	-2.01998	0.0433856	0.157135	1141	983	1095	1581	1663	1223	1257.35	1024.57	1135.82	1564.57	1380.51	1261.31
RLTA1_RS16205	897.813	0.305332	0.15115	2.02006	0.0433773	0.157135	837	1003	974	707	1106	767	922.347	1045.42	1010.31	699.652	918.127	791.027
RLTA1_RS11100	187.591	-0.343692	0.170183	-2.01954	0.0434309	0.157211	143	172	153	224	226	214	157.581	179.274	158.703	221.672	187.61	220.704
RLTA1_RS11300	209.509	0.340487	0.168644	2.01898	0.0434897	0.157335	185	231	248	186	211	190	203.864	240.769	257.244	184.067	175.158	195.952
RLTA1_RS00570	322.571	0.329731	0.163378	2.01821	0.0435698	0.157537	354	345	317	305	373	238	390.097	359.591	328.816	301.83	309.64	245.456
RLTA1_RS06125	18027.4	-0.684177	0.339237	-2.01681	0.0437153	0.157974	15831	9610	13528	24672	37910	10457	17445.3	10016.4	14032.3	24415.6	31470.3	10784.6
RLTA1_RS15795	380.183	-0.325138	0.161371	-2.01485	0.0439205	0.158626	291	329	336	379	483	478	320.673	342.914	348.524	375.061	400.954	492.974
RLTA1_RS00170	355.764	-0.306305	0.152112	-2.01368	0.0440434	0.158714	294	284	323	392	525	345	323.979	296.011	335.04	387.926	435.82	355.807
RLTA1_RS17705	335.194	-0.463918	0.230324	-2.0142	0.0439885	0.158714	278	219	299	403	342	469	306.347	228.262	310.145	398.812	283.906	483.692
RLTA1_RS19090	565.746	-0.261729	0.129971	-2.01376	0.0440351	0.158714	489	489	478	613	796	565	538.862	509.681	495.817	606.629	660.786	582.699
RLTA1_RS22150	3961.93	-0.309149	0.153503	-2.01396	0.0440142	0.158714	3486	3094	3424	4671	5828	3581	3841.46	3224.85	3551.63	4622.46	4838.02	3693.18
RLTA1_RS17040	415.172	0.397773	0.197598	2.01304	0.04411	0.158865	351	475	515	430	427	286	386.791	495.089	534.197	425.531	354.467	294.959
RLTA1_RS10090	382.029	-0.484631	0.24079	-2.01267	0.0441497	0.158919	310	294	297	446	715	292	341.61	306.434	308.071	441.365	593.545	301.147
RLTA1_RS09515	8594.89	-0.279643	0.139038	-2.01127	0.0442967	0.159227	7464	6697	7797	9521	10177	10090	8225.09	6980.23	8087.63	9422.05	8448.26	10406.1
RLTA1_RS15405	9420.62	-0.484813	0.241147	-2.01045	0.0443836	0.159227	8158	5251	8768	12890	14450	7965	8989.85	5473.07	9094.83	12756	11995.4	8214.51
RLTA1_RS16080	1931.44	-0.363704	0.180891	-2.01063	0.0443644	0.159227	1660	1432	1683	2712	2257	1904	1829.27	1492.56	1745.73	2683.82	1873.61	1963.64
RLTA1_RS16420	8219.69	-0.422658	0.210156	-2.01116	0.0443083	0.159227	6898	5863	7096	11986	11435	6682	7601.37	6110.96	7360.5	11861.4	9492.57	6891.32
RLTA1_RS17505	1604.15	0.22421	0.1115	2.01085	0.0443415	0.159227	1574	1616	1703	1585	1713	1405	1734.5	1684.34	1766.48	1568.53	1422.02	1449.01
RLTA1_RS25465	377.061	-0.277579	0.138041	-2.01084	0.044342	0.159227	299	323	344	392	530	399	329.488	336.66	356.823	387.926	439.971	411.499
RLTA1_RS34765	160.146	0.342227	0.170381	2.0086	0.0445799	0.159842	154	170	183	141	159	148	169.703	177.19	189.821	139.535	131.991	152.636
RLTA1_RS11825	1182.52	0.267138	0.133242	2.00492	0.0449719	0.161068	1110	1245	1306	1149	1362	923	1223.18	1297.65	1354.68	1137.06	1130.64	951.914
RLTA1_RS13300	14619.2	-0.524192	0.261446	-2.00497	0.0449658	0.161068	12100	9173	12612	22035	23235	10321	13333.8	9560.94	13082.1	21806	19288.1	10644.3
RLTA1_RS20925	1699.73	-0.269855	0.134617	-2.00462	0.0450041	0.161094	1544	1349	1462	2022	2215	1682	1701.44	1406.05	1516.5	2000.99	1838.74	1734.69
RLTA1_RS26830	124.045	-0.407087	0.203172	-2.00366	0.045107	0.161372	115	103	83	139	170	141	126.726	107.356	86.0938	137.555	141.123	145.417
RLTA1_RS07285	13474	0.235399	0.117582	2.002	0.0452848	0.161828	14156	13108	13932	12559	15774	11255	15599.5	13662.4	14451.3	12428.5	13094.5	11607.6
RLTA1_RS31930	506.262	-0.402607	0.201089	-2.00214	0.04527	0.161828	377	423	435	517	567	725	415.442	440.889	451.215	511.627	470.685	747.711
RLTA1_RS10805	398.23	0.279511	0.139664	2.00131	0.0453591	0.162004	389	430	418	329	464	357	428.665	448.185	433.581	325.581	385.182	368.183
RLTA1_RS00555	1963.26	-0.612156	0.306102	-1.99985	0.045517	0.162478	1662	1270	1450	2551	4033	1210	1831.47	1323.71	1504.05	2524.49	3347.93	1247.9
RLTA1_RS10800	928.836	0.271262	0.135686	1.99918	0.0455884	0.162643	889	1023	965	820	930	914	979.649	1066.26	1000.97	811.478	772.024	942.632
RLTA1_RS19310	4304.67	-0.244954	0.12255	-1.99882	0.0456279	0.162693	3481	3570	4110	4394	5648	4820	3835.95	3720.98	4263.2	4348.34	4688.59	4970.99
RLTA1_RS15850	543.499	0.455793	0.22813	1.99795	0.0457223	0.162926	430	761	597	489	637	351	473.846	793.184	619.253	483.918	528.795	361.995
RLTA1_RS28835	890.263	-0.265868	0.133084	-1.99775	0.0457438	0.162926	754	786	747	925	1105	1051	830.884	819.241	774.844	915.387	917.297	1083.92
RLTA1_RS01470	311.64	-0.304186	0.152314	-1.9971	0.0458141	0.163086	264	256	269	388	403	305	290.92	266.827	279.027	383.968	334.544	314.554
RLTA1_RS17610	531.299	0.276805	0.138687	1.99591	0.0459442	0.16337	496	590	563	502	524	495	546.576	614.952	583.986	496.783	434.99	510.506
RLTA1_RS30505	108.547	-0.40187	0.201347	-1.9959	0.0459447	0.16337	83	95	87	106	161	128	91.4633	99.0177	90.2429	104.898	133.651	132.01
RLTA1_RS03195	120.687	0.470689	0.235866	1.99558	0.0459793	0.163403	100	151	148	92	151	84	110.197	157.386	153.517	91.0439	125.35	86.6314
RLTA1_RS16010	6192.89	-0.306799	0.153765	-1.99524	0.0460164	0.163445	5785	5047	4797	6087	8769	7023	6374.88	5260.45	4975.81	6023.74	7279.44	7243
RLTA1_RS29925	276.895	0.338236	0.169586	1.99448	0.0460992	0.163648	255	323	298	256	253	263	281.002	336.66	309.108	253.34	210.024	271.239
RLTA1_RS23040	795.554	0.229196	0.114987	1.99323	0.0462364	0.164045	786	848	796	741	867	722	866.147	883.863	825.671	733.299	719.725	744.617
RLTA1_RS00585	147.577	-0.358916	0.180104	-1.99283	0.0462798	0.164108	114	123	129	154	190	182	125.624	128.202	133.808	152.4	157.725	187.701
RLTA1_RS01235	4523.75	-0.491556	0.246763	-1.99202	0.0463689	0.164334	4042	2882	3686	7315	5689	3781	4454.15	3003.89	3823.4	7238.98	4722.63	3899.44
RLTA1_RS13145	3045.16	0.336707	0.169163	1.99043	0.046544	0.164863	3323	3191	3093	3267	2672	2544	3661.84	3325.95	3208.29	3233.05	2218.12	2623.69
RLTA1_RS12080	382.967	0.340861	0.171307	1.98977	0.0466161	0.165028	338	477	399	317	388	367	372.465	497.173	413.873	313.706	322.092	378.497
RLTA1_RS03265	1412.92	-0.252798	0.12709	-1.98913	0.0466869	0.165188	1150	1205	1296	1574	1673	1613	1267.26	1255.96	1344.31	1557.64	1388.81	1663.53
RLTA1_RS00995	1659.54	-0.222513	0.11192	-1.98814	0.046796	0.165483	1353	1504	1481	1848	2023	1798	1490.96	1567.61	1536.2	1828.79	1679.36	1854.32
RLTA1_RS20905	479.054	0.325979	0.164041	1.98718	0.0469019	0.165767	516	426	565	467	483	400	568.615	444.016	586.06	462.147	400.954	412.53
RLTA1_RS24920	2307.21	0.270253	0.136097	1.98575	0.0470613	0.166239	2034	2652	2470	1979	2496	2177	2241.4	2764.16	2562.07	1958.43	2072.01	2245.2
RLTA1_RS00135	107.589	-0.382425	0.192628	-1.98531	0.0471104	0.166321	89	92	83	126	136	124	98.0751	95.8908	86.0938	124.691	112.898	127.884
RLTA1_RS05675	6607.15	0.574071	0.289377	1.98382	0.0472759	0.166813	5640	9890	6932	7719	5800	3370	6215.1	10308.3	7190.39	7638.78	4814.77	3475.57
RLTA1_RS14910	306.977	-0.344721	0.174081	-1.98024	0.0476768	0.168136	235	254	278	338	486	283	258.962	264.742	288.362	334.487	403.445	291.865
RLTA1_RS32770	4489.12	0.436933	0.220675	1.97999	0.0477049	0.168143	5539	4253	4777	4737	4844	2651	6103.8	4432.87	4955.06	4687.77	4021.16	2734.04
RLTA1_RS31145	3109.45	0.313043	0.158144	1.97948	0.0477616	0.16825	3460	3232	3041	3195	2833	2722	3812.81	3368.69	3154.35	3161.8	2351.77	2807.27
RLTA1_RS18750	1722.27	-0.385692	0.19489	-1.97902	0.0478138	0.168342	1634	1127	1451	2305	2175	1713	1800.62	1174.66	1505.09	2281.05	1805.54	1766.66
RLTA1_RS18470	267.274	0.345476	0.174718	1.97734	0.0480031	0.168916	300	310	235	248	278	223	330.59	323.11	243.76	245.423	230.777	229.986
RLTA1_RS15370	284.756	-0.319807	0.161835	-1.97613	0.0481404	0.169235	210	252	256	362	355	287	231.413	262.658	265.542	358.238	294.697	295.99
RLTA1_RS28885	17185.3	-0.212454	0.107513	-1.97608	0.0481461	0.169235	14978	14556	15512	17614	23123	18150	16505.3	15171.6	16090.2	17430.9	19195.2	18718.6
RLTA1_RS14300	793.566	0.256413	0.129823	1.97509	0.0482577	0.169442	762	902	783	746	904	660	839.699	940.147	812.186	738.247	750.44	680.675
RLTA1_RS19260	12755.8	-0.542513	0.274658	-1.97523	0.0482415	0.169442	10364	7931	11057	17944	22658	8544	11420.8	8266.42	11469.1	17757.5	18809.2	8811.65
RLTA1_RS04930	11685.5	0.401119	0.203232	1.9737	0.0484161	0.169905	13088	11037	13470	13242	10307	8294	14422.6	11503.8	13972.1	13104.4	8556.18	8553.82
RLTA1_RS13075	778.334	0.27151	0.137593	1.97328	0.0484634	0.169978	698	856	861	717	911	630	769.174	892.202	893.094	709.549	756.251	649.735
RLTA1_RS17845	596.037	0.363714	0.184366	1.97278	0.0485203	0.170085	533	807	563	529	663	475	587.349	841.13	583.986	523.502	550.378	489.88
RLTA1_RS20175	1765.14	0.237333	0.120491	1.96972	0.0488706	0.17122	1583	1865	1968	1596	1937	1623	1744.42	1943.87	2041.36	1579.41	1607.97	1673.84
RLTA1_RS30135	994.254	-0.316588	0.160797	-1.96887	0.0489681	0.171468	872	792	839	1320	1206	971	960.916	825.495	870.274	1306.28	1001.14	1001.42
RLTA1_RS10700	589.041	0.353108	0.179448	1.96775	0.0490969	0.171826	511	755	610	498	710	455	563.106	786.93	632.738	492.825	589.394	469.253
RLTA1_RS18395	2173.02	0.236591	0.12033	1.96618	0.0492778	0.172365	2071	2366	2221	1878	2367	2097	2282.18	2466.06	2303.79	1858.48	1964.92	2162.69
RLTA1_RS07335	391.081	-0.339235	0.172665	-1.9647	0.0494487	0.172869	293	346	340	500	555	344	322.877	360.633	352.673	494.804	460.724	354.776
RLTA1_RS21000	1156.91	0.25767	0.131196	1.96401	0.0495291	0.173056	1204	1287	1072	1051	1298	1012	1326.77	1341.43	1111.96	1040.08	1077.51	1043.7
RLTA1_RS09040	195.645	0.403673	0.20564	1.96301	0.0496451	0.173273	204	172	255	194	201	142	224.801	179.274	264.505	191.984	166.857	146.448
RLTA1_RS12880	1197.32	-0.248573	0.126628	-1.96301	0.0496446	0.173273	1062	1004	1029	1280	1696	1188	1170.29	1046.46	1067.36	1266.7	1407.91	1225.21
RLTA1_RS06100	1166.23	-0.215223	0.109719	-1.96158	0.0498112	0.173759	1011	994	1049	1260	1497	1231	1114.09	1036.04	1088.1	1246.91	1242.71	1269.56
RLTA1_RS36130	165.538	0.390454	0.19908	1.96129	0.0498452	0.173783	148	178	207	120	181	156	163.091	185.528	214.716	118.753	150.254	160.887
RLTA1_RS02935	953.128	-0.261803	0.133538	-1.96052	0.0499347	0.173784	844	733	874	1043	1222	1039	930.061	764	906.578	1032.16	1014.42	1071.55
RLTA1_RS19335	3959.66	-0.248336	0.126661	-1.96064	0.0499205	0.173784	3350	3230	3664	4775	4826	4041	3691.59	3366.6	3800.58	4725.38	4006.22	4167.59
RLTA1_RS21445	19725.3	-0.346037	0.176467	-1.96091	0.049889	0.173784	17419	13558	18111	25864	23394	20579	19195.2	14131.4	18786.1	25595.2	19420.1	21223.7
RLTA1_RS32955	264.828	0.40872	0.208492	1.96036	0.0499534	0.173784	271	331	254	225	337	174	298.633	344.999	263.468	222.662	279.755	179.451
RLTA1_RS03115	1910.19	0.222618	0.113614	1.95942	0.0500639	0.174074	1783	2060	1986	1678	2197	1750	1964.81	2147.12	2060.03	1660.56	1823.8	1804.82
RLTA1_RS13805	90.7129	-0.466845	0.23838	-1.95841	0.0501825	0.174226	74	64	77	98	105	128	81.5456	66.7067	79.8702	96.9815	87.164	132.01
RLTA1_RS26005	625.772	0.261082	0.13331	1.95846	0.0501766	0.174226	655	602	672	586	640	579	721.789	627.46	697.049	579.91	531.285	597.138
RLTA1_RS34945	226.524	-0.380819	0.194459	-1.95835	0.0501889	0.174226	190	184	182	234	265	308	209.374	191.782	188.784	231.568	219.985	317.648
RLTA1_RS03290	2322.56	0.228448	0.116711	1.95739	0.0503019	0.174337	2183	2369	2548	2047	2535	2218	2405.6	2469.19	2642.98	2025.73	2104.39	2287.48
RLTA1_RS10350	344.908	-0.323222	0.165101	-1.95772	0.0502626	0.174337	297	259	311	342	515	372	327.284	269.954	322.593	338.446	427.519	383.653
RLTA1_RS15030	5393.59	0.218594	0.111663	1.95762	0.0502751	0.174337	5529	5338	5541	5363	5751	4728	6092.78	5563.75	5747.54	5307.26	4774.1	4876.11
RLTA1_RS09520	2984.5	-0.22429	0.114666	-1.95603	0.0504611	0.174794	2592	2418	2779	3187	3933	3131	2856.3	2520.26	2882.59	3153.88	3264.91	3229.08
RLTA1_RS23375	1751.09	0.204503	0.104578	1.95551	0.0505235	0.174916	1709	1797	1802	1600	2032	1562	1883.26	1873	1869.17	1583.37	1686.83	1610.93
RLTA1_RS21475	15641.3	-0.302326	0.154713	-1.9541	0.0506893	0.175396	14364	12152	13045	15085	23170	17123	15828.7	12665.9	13531.3	14928.2	19234.2	17659.4
RLTA1_RS28405	1112.96	0.260312	0.133229	1.95386	0.0507172	0.175398	1172	1117	1142	990	1352	907	1291.51	1164.24	1184.57	979.711	1122.34	935.412
RLTA1_RS10950	1998.21	-0.495534	0.253649	-1.95362	0.0507465	0.175405	1485	1462	1750	2904	3290	1366	1636.42	1523.83	1815.23	2873.82	2731.14	1408.79
RLTA1_RS09445	1116.25	-0.290812	0.148893	-1.95316	0.050801	0.175423	979	972	888	1330	1582	1023	1078.83	1013.11	921.1	1316.18	1313.27	1055.05
RLTA1_RS19510	292.186	-0.273284	0.139923	-1.95311	0.0508063	0.175423	245	242	262	320	395	305	269.982	252.235	271.766	316.674	327.903	314.554
RLTA1_RS32260	824.167	0.249871	0.12795	1.95287	0.0508351	0.175429	793	878	864	783	821	779	873.86	915.132	896.206	774.863	681.539	803.403
RLTA1_RS30905	141.343	0.350817	0.179679	1.95247	0.0508823	0.175498	145	146	157	132	132	129	159.785	152.175	162.852	130.628	109.578	133.041
RLTA1_RS08105	189.222	0.46825	0.239859	1.95219	0.0509158	0.175519	165	238	220	171	135	190	181.825	248.065	228.2	169.223	112.068	195.952
RLTA1_RS26560	202.449	-0.566633	0.290467	-1.95076	0.0510853	0.176009	153	165	144	306	348	129	168.601	171.978	149.368	302.82	288.886	133.041
RLTA1_RS04055	225.718	0.391937	0.200975	1.95018	0.0511546	0.176154	200	305	222	218	237	168	220.394	317.899	230.275	215.734	196.742	173.263
RLTA1_RS26770	528.464	0.26152	0.13416	1.94932	0.0512573	0.176413	481	557	596	465	605	465	530.047	580.557	618.216	460.167	502.23	479.566
RLTA1_RS21715	1316.55	0.304247	0.156226	1.94749	0.0514765	0.177073	1193	1515	1418	1360	1413	985	1314.65	1579.07	1470.86	1345.87	1172.98	1015.86
RLTA1_RS27120	315.749	0.302289	0.15528	1.94674	0.0515659	0.177254	307	372	309	287	365	253	338.304	387.733	320.518	284.017	302.999	260.925
RLTA1_RS32705	257.731	-0.2797	0.143688	-1.94659	0.0515844	0.177254	209	228	222	292	327	279	230.311	237.643	230.275	288.965	271.454	287.74
RLTA1_RS19545	2291.91	-0.334293	0.171874	-1.94499	0.0517759	0.177723	1723	1864	2160	3105	2573	2386	1898.69	1942.83	2240.51	3072.73	2135.93	2460.74
RLTA1_RS30635	895.899	0.303594	0.156074	1.9452	0.051751	0.177723	953	888	958	950	916	684	1050.18	925.555	993.709	940.127	760.402	705.427
RLTA1_RS18185	629.052	0.274469	0.141171	1.94423	0.0518675	0.177942	647	718	583	558	677	576	712.973	748.366	604.731	552.201	562	594.044
RLTA1_RS16695	602.008	-0.272724	0.140324	-1.94353	0.0519517	0.178136	545	476	520	710	786	602	600.572	496.131	539.383	702.621	652.485	620.858
RLTA1_RS14185	2417.29	0.636441	0.327643	1.94248	0.0520788	0.178403	2804	3154	2361	2708	2540	862	3089.92	3287.39	2449.01	2679.86	2108.54	889.003
RLTA1_RS19770	210.94	-0.400643	0.206259	-1.94243	0.0520851	0.178403	185	169	160	280	312	178	203.864	176.147	165.964	277.09	259.002	183.576
RLTA1_RS34490	293.628	0.34781	0.179173	1.9412	0.0522344	0.17882	303	346	282	288	334	206	333.896	360.633	292.512	285.007	277.264	212.453
RLTA1_RS31160	530.903	-0.366836	0.189056	-1.94035	0.0523367	0.179075	466	409	435	748	599	540	513.517	426.297	451.215	740.226	497.25	556.916
RLTA1_RS33730	165.56	-0.348136	0.17945	-1.94002	0.0523776	0.179119	135	142	135	168	213	207	148.766	148.005	140.032	166.254	176.818	213.484
RLTA1_RS22570	11101.6	0.233251	0.120269	1.93941	0.052451	0.179275	10854	11672	11438	11450	11452	9484	11960.8	12165.6	11864.4	11331	9506.68	9781.09
RLTA1_RS11225	189.611	-0.351405	0.181306	-1.93819	0.0526006	0.179691	166	152	153	247	250	180	182.927	158.428	158.703	244.433	207.533	185.639
RLTA1_RS32415	24330	-0.562011	0.290135	-1.93706	0.0527375	0.180063	20918	14764	19774	39598	37827	15942	23051	15388.4	20511.1	39186.5	31401.4	16441.4
RLTA1_RS12030	85.6342	-0.526985	0.272121	-1.93658	0.0527963	0.180168	71	58	69	79	105	134	78.2397	60.4529	71.572	78.179	87.164	138.198
RLTA1_RS01450	1227.12	-0.415362	0.214559	-1.93589	0.052881	0.180173	968	1022	987	1524	2087	937	1066.7	1065.22	1023.79	1508.16	1732.49	966.352
RLTA1_RS33775	656.003	0.333808	0.172432	1.93589	0.0528817	0.180173	621	753	699	490	673	677	684.322	784.846	725.055	484.908	558.68	698.208
RLTA1_RS34295	124.085	0.395103	0.204079	1.93603	0.0528641	0.180173	141	130	128	95	154	96	155.377	135.498	132.771	94.0127	127.84	99.0073
RLTA1_RS05970	9486.89	0.326836	0.16888	1.93532	0.0529517	0.180264	9800	9450	10626	10111	10194	6576	10799.3	9849.66	11022.1	10005.9	8462.38	6782
RLTA1_RS29215	1611.48	0.530113	0.273931	1.93521	0.0529645	0.180264	1766	1752	1871	1925	1524	762	1946.08	1826.1	1940.74	1904.99	1265.12	785.87
RLTA1_RS25840	288.966	0.355627	0.183897	1.93383	0.0531337	0.180744	334	269	313	301	278	225	368.057	280.377	324.667	297.872	230.777	232.048
RLTA1_RS16945	19246.4	-0.424463	0.219521	-1.93359	0.0531633	0.18075	17424	12806	16156	27373	27571	15704	19200.7	13347.6	16758.2	27088.5	22887.6	16195.9
RLTA1_RS14585	528.394	-0.304197	0.157376	-1.93293	0.0532448	0.180931	446	461	430	608	596	636	491.478	480.497	446.028	601.681	494.759	655.923
RLTA1_RS21625	1215.33	-0.47572	0.246157	-1.93259	0.0532869	0.180979	1030	1014	827	1327	1189	1883	1135.03	1056.88	857.826	1313.21	987.028	1941.99
RLTA1_RS22025	3146.78	0.356848	0.184707	1.93197	0.053363	0.181142	3390	3470	3132	3366	2562	2736	3735.67	3616.75	3248.75	3331.02	2126.8	2821.71
RLTA1_RS05775	1083.34	0.267402	0.138425	1.93174	0.0533913	0.181142	1048	1125	1178	991	1045	1069	1154.86	1172.58	1221.91	980.701	867.489	1102.49
RLTA1_RS00385	104.692	-0.392889	0.20341	-1.93151	0.05342	0.181144	86	95	75	132	138	108	94.7692	99.0177	77.7956	130.628	114.558	111.383
RLTA1_RS25155	192.219	-0.35025	0.181435	-1.93045	0.0535512	0.181493	181	136	160	216	255	214	199.456	141.752	165.964	213.755	211.684	220.704
RLTA1_RS27070	390.223	0.280877	0.145557	1.92967	0.0536484	0.181727	403	444	364	354	430	339	444.093	462.778	377.568	350.321	356.957	349.619
RLTA1_RS28150	1427.03	0.38018	0.197045	1.92941	0.0536798	0.181738	1406	1426	1742	1386	1724	889	1549.37	1486.31	1806.93	1371.6	1431.15	916.849
RLTA1_RS11530	874.987	-0.23968	0.124263	-1.92881	0.0537549	0.181801	721	801	750	886	1153	978	794.519	834.876	777.956	876.792	957.143	1008.64
RLTA1_RS23415	1768.11	0.229113	0.118772	1.92901	0.053729	0.181801	1667	1989	1749	1700	1903	1573	1836.98	2073.12	1814.19	1682.33	1579.74	1622.28
RLTA1_RS31460	1542.29	-0.379332	0.196804	-1.92746	0.0539225	0.182272	1273	1162	1358	2045	2322	1241	1402.81	1211.14	1408.62	2023.75	1927.57	1279.88
RLTA1_RS02615	769.161	-0.279506	0.145062	-1.9268	0.0540041	0.182321	606	647	716	739	1091	866	667.792	674.363	742.689	731.32	905.675	893.128
RLTA1_RS09615	21964.8	-0.398615	0.206919	-1.92643	0.0540504	0.182321	19822	14046	19634	28137	33183	18955	21843.2	14640	20365.9	27844.6	27546.3	19548.8
RLTA1_RS10380	114.816	-0.496159	0.257487	-1.92693	0.0539884	0.182321	100	89	80	179	154	95	110.197	92.764	82.982	177.14	127.84	97.9759
RLTA1_RS13755	484.929	0.370485	0.192302	1.92657	0.0540327	0.182321	405	642	506	376	513	457	446.297	669.151	524.861	372.092	425.858	471.316
RLTA1_RS16260	184.329	-0.505427	0.262472	-1.92564	0.0541492	0.182463	123	161	148	145	255	285	135.542	167.809	153.517	143.493	211.684	293.928
RLTA1_RS24050	566.268	-0.277426	0.144054	-1.92585	0.0541232	0.182463	459	455	536	563	775	641	505.803	474.243	555.979	557.149	643.353	661.08
RLTA1_RS03435	654.139	-0.66039	0.343206	-1.92418	0.0543319	0.182945	611	317	499	1064	1130	400	673.302	330.407	517.6	1052.94	938.05	412.53
RLTA1_RS25985	241.291	-0.320596	0.166626	-1.92404	0.054349	0.182945	172	216	221	245	352	261	189.538	225.135	229.238	242.454	292.207	269.176
RLTA1_RS22915	118.507	-0.369872	0.192438	-1.92203	0.0546014	0.183698	105	98	89	130	154	140	115.707	102.145	92.3175	128.649	127.84	144.386
RLTA1_RS05185	4563.05	-0.443721	0.230919	-1.92154	0.0546633	0.18381	3915	3039	3971	6713	6598	3546	4314.2	3167.52	4119.02	6643.24	5477.22	3657.08
RLTA1_RS32565	345.82	0.294937	0.153526	1.92108	0.0547211	0.183908	334	343	402	303	347	334	368.057	357.506	416.985	299.851	288.056	344.463
RLTA1_RS05610	3366.33	0.286356	0.149132	1.92016	0.0548382	0.184106	3194	4167	3119	3037	3797	2853	3519.69	4343.23	3235.26	3005.44	3152.02	2942.37
RLTA1_RS13790	2222.2	0.313948	0.163529	1.91983	0.0548795	0.184106	2141	2335	2502	1772	2148	2335	2359.31	2433.75	2595.26	1753.58	1783.13	2408.15
RLTA1_RS15170	1841.78	0.303947	0.158329	1.91971	0.0548942	0.184106	1586	2159	2032	1532	2257	1508	1747.72	2250.31	2107.74	1516.08	1873.61	1555.24
RLTA1_RS16025	537.62	-0.260697	0.135779	-1.92	0.0548574	0.184106	448	461	475	606	636	612	493.682	480.497	492.706	599.702	527.965	631.171
RLTA1_RS16110	419.815	0.26019	0.135558	1.9194	0.0549342	0.184144	410	411	475	389	472	358	451.807	428.382	492.706	384.957	391.823	369.215
RLTA1_RS08970	276.966	0.423328	0.220924	1.91617	0.0553437	0.18542	260	238	402	257	256	236	286.512	248.065	416.985	254.329	212.514	243.393
RLTA1_RS19495	691.481	-0.223864	0.11696	-1.91402	0.055618	0.186242	593	620	592	754	883	733	653.467	646.221	614.067	746.164	733.007	755.962
RLTA1_RS03360	932.591	0.292199	0.152723	1.91327	0.055714	0.186273	1039	847	1015	899	1041	738	1144.94	882.821	1052.83	889.657	864.168	761.118
RLTA1_RS16615	302.014	-0.287778	0.150397	-1.91345	0.0556905	0.186273	229	274	268	305	414	340	252.351	285.588	277.99	301.83	343.675	350.651
RLTA1_RS24745	1875.75	-0.360649	0.188466	-1.9136	0.0556709	0.186273	1518	1588	1543	1968	3237	1640	1672.79	1655.16	1600.52	1947.55	2687.14	1691.37
RLTA1_RS20660	774.759	-0.527242	0.275665	-1.91262	0.0557969	0.186453	587	553	657	1052	1430	500	646.855	576.387	681.49	1041.07	1187.09	515.663
RLTA1_RS01065	142	-0.43134	0.225585	-1.9121	0.0558638	0.18658	106	129	107	151	159	202	116.809	134.456	110.988	149.431	131.991	208.328
RLTA1_RS02955	798.486	-0.343911	0.179907	-1.91161	0.0559264	0.186595	604	684	706	744	1011	1071	665.589	712.928	732.316	736.268	839.265	1104.55
RLTA1_RS22440	1515.39	-0.238689	0.124851	-1.91179	0.0559031	0.186595	1258	1403	1275	1508	2057	1669	1386.28	1462.34	1322.53	1492.33	1707.58	1721.28
RLTA1_RS01140	911.906	0.314178	0.164651	1.90815	0.0563723	0.187986	791	1136	942	805	1081	722	871.657	1184.04	977.113	796.634	897.374	744.617
RLTA1_RS01890	316.639	-0.356488	0.18694	-1.90697	0.056525	0.188354	207	264	318	316	466	356	228.107	275.165	329.853	312.716	386.842	367.152
RLTA1_RS06205	1259.69	0.320894	0.168286	1.90684	0.0565414	0.188354	1375	1160	1420	1323	1172	1046	1515.21	1209.06	1472.93	1309.25	972.916	1078.77
RLTA1_RS15870	5264.3	0.221514	0.116191	1.90647	0.056589	0.188415	4705	5565	5801	5045	5641	4759	5184.76	5800.35	6017.23	4992.57	4682.78	4908.08
RLTA1_RS03495	8643.36	0.185025	0.0970677	1.90615	0.0566313	0.188459	8285	8761	8994	8427	9702	7637	9129.8	9131.52	9329.25	8339.42	8053.95	7876.23
RLTA1_RS15280	521.436	-0.255112	0.133881	-1.90551	0.0567137	0.188635	428	454	464	528	676	600	471.642	473.2	481.296	522.513	561.17	618.795
RLTA1_RS23445	812.841	-0.265525	0.139386	-1.90496	0.0567853	0.188776	646	648	798	861	1138	839	711.871	675.405	827.745	852.052	944.691	865.282
RLTA1_RS01035	1360.66	-0.208466	0.109494	-1.90391	0.0569225	0.189134	1117	1252	1207	1438	1823	1396	1230.9	1304.95	1251.99	1423.06	1513.33	1439.73
RLTA1_RS33110	6143.71	0.39759	0.208867	1.90355	0.0569686	0.189178	6878	5799	7068	6833	6226	3856	7579.33	6044.25	7331.46	6761.99	5168.41	3976.79
RLTA1_RS36400	360.268	-0.328355	0.172514	-1.90335	0.0569945	0.189178	304	288	311	385	416	463	334.998	300.18	322.593	380.999	345.335	477.504
RLTA1_RS05335	24666.3	-0.461975	0.242778	-1.90287	0.0570575	0.18929	20414	16818	21428	35986	38275	17803	22495.6	17529.3	22226.7	35612	31773.3	18360.7
RLTA1_RS01725	2049.79	0.292135	0.153611	1.90178	0.0572002	0.189568	1841	2453	2105	1965	1936	1918	2028.72	2556.74	2183.46	1944.58	1607.14	1978.08
RLTA1_RS14565	1557.18	0.23415	0.123119	1.90182	0.0571952	0.189568	1554	1580	1629	1432	1581	1517	1712.46	1646.82	1689.72	1417.12	1312.44	1564.52
RLTA1_RS19860	6300.4	-0.274196	0.144266	-1.90063	0.0573502	0.189967	5938	4679	5486	6824	8514	6662	6543.48	4876.88	5690.49	6753.08	7067.75	6870.69
RLTA1_RS33755	572.332	0.27411	0.144244	1.90032	0.0573912	0.190005	536	683	556	535	599	512	590.655	711.885	576.725	529.44	497.25	528.039
RLTA1_RS26585	163.91	-0.38831	0.20442	-1.89957	0.0574899	0.190234	119	166	117	192	196	199	131.134	173.02	121.361	190.005	162.706	205.234
RLTA1_RS36155	2554.41	0.529897	0.279035	1.89904	0.0575595	0.190366	3787	2041	2656	1462	3098	2184	4173.15	2127.32	2755	1446.81	2571.75	2252.42
RLTA1_RS35890	164.959	-0.424141	0.223378	-1.89875	0.0575969	0.190392	137	130	131	154	203	239	150.97	135.498	135.883	152.4	168.517	246.487
RLTA1_RS28760	1667.11	0.540142	0.284544	1.89827	0.0576604	0.190504	1972	1412	2200	1986	1464	868	2173.08	1471.72	2282	1965.36	1215.31	895.191
RLTA1_RS25885	139.64	-0.373675	0.197021	-1.89663	0.0578769	0.191122	127	103	114	156	214	136	139.95	107.356	118.249	154.379	177.648	140.26
RLTA1_RS18140	670.38	0.333404	0.175839	1.89607	0.0579509	0.191268	625	784	711	573	861	482	688.73	817.157	737.503	567.045	714.745	497.099
RLTA1_RS08795	482.592	-0.32751	0.1728	-1.89531	0.0580514	0.191336	385	442	385	438	697	581	424.258	460.693	399.351	433.448	578.603	599.2
RLTA1_RS14070	390.098	0.278129	0.146751	1.89524	0.0580607	0.191336	343	420	450	345	426	352	377.975	437.763	466.774	341.415	353.637	363.027
RLTA1_RS24535	948.177	0.278525	0.146942	1.89547	0.0580301	0.191336	986	944	1011	899	1142	710	1086.54	983.923	1048.68	889.657	948.012	732.241
RLTA1_RS20330	1509.08	-0.42415	0.223915	-1.89425	0.058192	0.19167	1069	1343	1243	1731	2723	1177	1178	1399.8	1289.33	1713.01	2260.45	1213.87
RLTA1_RS06160	1109.91	0.216767	0.114599	1.89153	0.0585534	0.192725	1134	1081	1160	1061	1234	975	1249.63	1126.72	1203.24	1049.97	1024.38	1005.54
RLTA1_RS33725	946.681	-0.228179	0.120641	-1.89139	0.058572	0.192725	834	779	853	1058	1184	1003	919.041	811.945	884.796	1047	982.878	1034.42
RLTA1_RS19415	1483.12	-0.19902	0.10525	-1.89093	0.0586342	0.192831	1282	1283	1343	1597	1913	1539	1412.72	1337.26	1393.06	1580.4	1588.04	1587.21
RLTA1_RS06130	11990.6	-1.0821	0.572448	-1.8903	0.0587175	0.193006	8337	5768	7598	18745	29161	5920	9187.11	6011.94	7881.22	18550.2	24207.5	6105.45
RLTA1_RS29085	724.672	0.269953	0.142886	1.88929	0.0588527	0.193352	718	737	789	629	903	580	791.213	768.169	818.41	622.463	749.61	598.169
RLTA1_RS20145	837.626	0.27853	0.147538	1.88785	0.0590463	0.193889	854	840	905	829	974	622	941.081	875.525	938.734	820.385	808.55	641.485
RLTA1_RS05725	6410.7	0.522636	0.277488	1.88345	0.0596387	0.195455	6281	7378	7777	7139	6981	2837	6921.46	7690.03	8066.89	7064.81	5795.16	2925.87
RLTA1_RS05825	1862.59	0.226119	0.120042	1.88367	0.0596099	0.195455	1694	2061	1937	1802	1959	1689	1866.73	2148.16	2009.2	1783.27	1626.23	1741.91
RLTA1_RS10355	515.993	-0.267865	0.142223	-1.88341	0.0596448	0.195455	443	439	443	507	744	554	488.172	457.566	459.513	501.731	617.619	571.354
RLTA1_RS31705	13137.4	-0.604571	0.32092	-1.88387	0.0595825	0.195455	10467	8207	10783	18750	25805	7344	11534.3	8554.09	11184.9	18555.1	21421.6	7574.06
RLTA1_RS04945	1653.75	-0.322073	0.171057	-1.88285	0.0597213	0.195606	1327	1348	1487	2261	2113	1475	1462.31	1405.01	1542.43	2237.5	1754.07	1521.21
RLTA1_RS01855	291.307	-0.410829	0.218374	-1.88131	0.0599303	0.195892	240	196	272	267	500	308	264.472	204.289	282.139	264.225	415.067	317.648
RLTA1_RS05015	573.409	-0.318163	0.169076	-1.88177	0.0598669	0.195892	448	535	463	732	797	507	493.682	557.626	480.258	724.393	661.616	522.882
RLTA1_RS11885	173.186	0.371469	0.197451	1.88132	0.0599285	0.195892	164	226	164	139	202	143	180.723	235.558	170.113	137.555	167.687	147.48
RLTA1_RS19570	121.03	0.409682	0.21776	1.88134	0.0599253	0.195892	112	146	133	103	101	123	123.42	152.175	137.958	101.93	83.8434	126.853
RLTA1_RS19805	1834.5	0.33072	0.175837	1.88083	0.0599946	0.195946	1698	2130	1967	1987	1903	1289	1871.14	2220.08	2040.32	1966.35	1579.74	1329.38
RLTA1_RS26860	157.021	0.347795	0.184925	1.88074	0.0600077	0.195946	149	177	173	141	189	114	164.193	184.486	179.449	139.535	156.895	117.571
RLTA1_RS17080	258.539	-0.368788	0.196129	-1.88033	0.0600628	0.196026	218	184	236	357	306	259	240.229	191.782	244.797	353.29	254.021	267.113
RLTA1_RS29240	939.97	0.281019	0.149492	1.87983	0.0601319	0.196152	897	1001	1023	990	889	804	988.465	1043.33	1061.13	979.711	737.988	829.186
RLTA1_RS32475	116.482	0.392716	0.209045	1.87862	0.0602967	0.19659	122	111	141	90	113	116	134.44	115.694	146.256	89.0647	93.805	119.634
RLTA1_RS12645	6574.35	0.352786	0.188022	1.8763	0.060614	0.197525	6721	6578	7578	6957	7349	4206	7406.33	6856.2	7860.47	6884.7	6100.65	4337.76
RLTA1_RS25560	476.578	0.267185	0.14248	1.87525	0.0607587	0.197896	434	537	505	468	527	385	478.254	559.711	523.824	463.136	437.48	397.06
RLTA1_RS01030	8745.95	-0.349124	0.186275	-1.87424	0.0608971	0.198247	7863	6212	7654	11863	11601	7783	8664.77	6474.72	7939.3	11739.7	9630.37	8026.81
RLTA1_RS05935	298.15	-0.333372	0.177939	-1.87353	0.0609959	0.198468	247	245	254	310	348	390	272.186	255.362	263.468	306.778	288.886	402.217
RLTA1_RS04955	1214.26	-0.341727	0.182447	-1.87302	0.0610661	0.198596	979	955	1099	1334	2006	1053	1078.83	995.389	1139.97	1320.14	1665.25	1085.99
RLTA1_RS00990	1129.85	-0.419571	0.2241	-1.87225	0.0611724	0.198841	1022	989	716	1462	1155	1429	1126.21	1030.83	742.689	1446.81	958.804	1473.76
RLTA1_RS15410	2698.6	-0.324413	0.173385	-1.87106	0.0613369	0.199275	2218	2056	2509	3546	3696	2351	2444.16	2142.95	2602.52	3509.15	3068.17	2424.65
RLTA1_RS05940	317.949	-0.400246	0.213954	-1.8707	0.0613861	0.199334	256	264	255	330	342	461	282.104	275.165	264.505	326.57	283.906	475.441
RLTA1_RS08235	3695.71	0.251053	0.134242	1.87015	0.0614625	0.199482	3898	3470	3989	3621	4207	2956	4295.47	3616.75	4137.69	3583.37	3492.37	3048.6
RLTA1_RS20245	2647.35	-0.432898	0.231589	-1.86925	0.061588	0.199789	2257	1911	2199	3575	4323	1937	2487.14	1991.82	2280.97	3537.85	3588.67	1997.68
RLTA1_RS07865	201.155	0.314101	0.168103	1.8685	0.0616927	0.199826	221	221	188	191	208	171	243.535	230.346	195.008	189.015	172.668	176.357
RLTA1_RS12305	720.45	0.264568	0.14157	1.86881	0.061649	0.199826	711	719	797	695	848	554	783.499	749.408	826.708	687.777	703.953	571.354
RLTA1_RS31340	388.347	-0.318705	0.170557	-1.86861	0.0616766	0.199826	279	387	314	396	506	467	307.449	403.367	325.704	391.885	420.047	481.629
RLTA1_RS18485	2494.86	0.646853	0.346421	1.86724	0.0618678	0.200292	1489	4928	2273	2117	2565	1561	1640.83	5136.41	2357.73	2095	2129.29	1609.9
RLTA1_RS30780	276.542	0.339128	0.181689	1.86653	0.061967	0.200513	308	238	327	268	281	227	339.406	248.065	339.189	265.215	233.267	234.111
RLTA1_RS04925	648.683	-0.268704	0.144044	-1.86543	0.0621212	0.200668	546	549	571	702	965	611	601.674	572.218	592.284	694.704	801.078	630.14
RLTA1_RS08190	1895.42	-0.450519	0.241527	-1.8653	0.0621399	0.200668	1484	1427	1623	2440	3339	1338	1635.32	1487.35	1683.5	2414.64	2771.81	1379.91
RLTA1_RS15865	1740.83	0.267869	0.143562	1.86588	0.0620577	0.200668	1545	1848	2002	1476	1828	1708	1702.54	1926.16	2076.62	1460.66	1517.48	1761.5
RLTA1_RS19690	3572.14	-0.325854	0.174675	-1.86548	0.0621142	0.200668	3138	2602	3221	4806	4162	3598	3457.97	2712.04	3341.06	4756.05	3455.01	3710.71
RLTA1_RS12085	1661.98	0.2992	0.160442	1.86485	0.062203	0.200707	1551	1815	1831	1404	1565	1729	1709.15	1891.76	1899.25	1389.41	1299.16	1783.16
RLTA1_RS27535	176.662	0.333066	0.17861	1.86477	0.0622141	0.200707	163	197	198	179	166	150	179.621	205.331	205.38	177.14	137.802	154.699
RLTA1_RS12910	332.79	0.289049	0.155098	1.86365	0.0623707	0.200874	342	374	320	313	387	259	376.873	389.817	331.928	309.747	321.261	267.113
RLTA1_RS17010	222.558	-0.351882	0.188784	-1.86393	0.0623309	0.200874	212	151	189	237	317	243	233.617	157.386	196.045	234.537	263.152	250.612
RLTA1_RS21540	8233.87	-0.323698	0.173703	-1.86351	0.0623907	0.200874	7520	5885	7251	10878	9918	8206	8286.8	6133.89	7521.28	10765	8233.26	8463.06
RLTA1_RS29905	9347.31	-0.344459	0.18479	-1.86405	0.062314	0.200874	7972	7011	8308	13202	11606	8411	8784.89	7307.51	8617.68	13064.8	9634.52	8674.48
[truncated: 4,983 more rows]

## Sheet: WTvsDelpssA_edgeR
locus_tag	logFC	logCPM	PValue	FDR	DelpssA_1 raw counts	DelpssA_2 raw counts	DelpssA_3 raw counts	WT_1 raw counts	WT_2 raw counts	WT_3 raw counts	DelpssA_1 normalized counts	DelpssA_2 normalized counts	DelpssA_3 normalized counts	WT_1 normalized counts	WT_2 normalized counts	WT_3 normalized counts
RLTA1_RS27750	-4.05785	6.89211	9.63055e-129	6.72405e-125	221	225	206	3845	4699	3747	14.2061	13.6338	12.4408	220.305	226.58	224.108
RLTA1_RS27755	-4.31332	6.94893	1.3009e-122	4.54143e-119	182	198	194	3661	4851	4361	11.6992	11.9977	11.716	209.762	233.909	260.832
RLTA1_RS27765	-4.00638	6.00642	1.17521e-118	2.73511e-115	131	108	125	2032	2411	2160	8.42083	6.54421	7.549	116.426	116.255	129.19
RLTA1_RS27745	-4.18599	7.37563	1.10432e-96	1.92759e-93	221	328	293	5179	6280	5747	14.2061	19.875	17.6949	296.738	302.814	343.728
RLTA1_RS27770	-3.32055	6.75071	7.77194e-95	1.08527e-91	276	332	344	3338	3978	3396	17.7416	20.1174	20.7748	191.256	191.814	203.115
RLTA1_RS27740	-3.43349	7.81663	2.51868e-85	2.9309e-82	573	698	585	7728	8485	6436	36.8331	42.295	35.3293	442.787	409.136	384.938
RLTA1_RS27760	-3.35287	6.40386	1.60178e-79	1.59766e-76	192	267	275	2535	3282	2643	12.342	16.1787	16.6078	145.247	158.254	158.078
RLTA1_RS17400	-4.39452	9.19746	1.27591e-74	1.11355e-71	696	888	1014	23777	20621	16800	44.7397	53.8079	61.2375	1362.34	994.319	1004.81
RLTA1_RS34380	1.73705	5.7777	5.25259e-36	4.07484e-33	1355	1456	1286	450	506	430	87.1009	88.2256	77.6641	25.7834	24.3987	25.7183
RLTA1_RS34375	2.27612	9.74962	7.64977e-29	5.34107e-26	21194	22426	25829	5599	6745	3975	1362.37	1358.89	1559.86	320.803	325.235	237.745
RLTA1_RS09750	1.1758	5.73318	1.08514e-19	6.88769e-17	1149	1220	1212	549	703	542	73.859	73.9253	73.1951	31.4558	33.8978	32.4171
RLTA1_RS07400	1.56631	4.13332	1.15353e-17	6.71161e-15	386	479	407	153	147	179	24.8125	29.0248	24.5795	8.76636	7.08816	10.706
RLTA1_RS23195	1.33331	6.61167	1.81217e-17	9.73275e-15	2398	2213	2179	868	1199	987	154.146	134.096	131.594	49.7333	57.8143	59.0325
RLTA1_RS07395	1.69889	4.08015	4.17353e-16	2.0814e-13	400	478	375	118	139	174	25.7125	28.9642	22.647	6.76098	6.70241	10.407
RLTA1_RS23585	1.27692	5.19257	5.23758e-16	2.43792e-13	869	768	872	435	406	326	55.8603	46.5366	52.6618	24.924	19.5768	19.4981
RLTA1_RS07405	1.36366	4.3072	7.89751e-16	3.44628e-13	485	493	401	189	203	210	31.1764	29.8731	24.2172	10.829	9.78841	12.5601
RLTA1_RS14840	1.31801	6.20337	2.08506e-15	8.56347e-13	1505	2048	1564	794	853	666	96.7431	124.098	94.4531	45.4934	41.1306	39.8335
RLTA1_RS34350	1.89957	8.58333	2.29394e-15	8.89796e-13	10143	8970	10254	3298	3860	1860	652.004	543.533	619.26	188.964	186.124	111.247
RLTA1_RS10060	2.04455	6.80883	1.07532e-14	3.95153e-12	2640	2913	3230	830	1171	453	169.702	176.512	195.066	47.5561	56.4642	27.094
RLTA1_RS23580	1.2703	4.9119	1.2442e-14	4.34351e-12	690	702	671	377	323	262	44.354	42.5373	40.523	21.6008	15.5747	15.6702
RLTA1_RS23265	1.28171	6.56687	2.11062e-14	7.01731e-12	1873	2368	2300	822	1282	948	120.399	143.488	138.902	47.0977	61.8164	56.6999
RLTA1_RS34450	1.24737	5.75294	6.00479e-14	1.9057e-11	1143	1269	1276	453	778	539	73.4733	76.8944	77.0602	25.9553	37.5142	32.2376
RLTA1_RS34280	1.14208	5.79435	6.48058e-14	1.96728e-11	1262	1275	1167	609	627	646	81.1228	77.258	70.4775	34.8935	30.2332	38.6373
RLTA1_RS10065	1.31533	5.67812	1.53572e-13	4.46768e-11	1013	1351	1191	451	738	442	65.1168	81.8632	71.9269	25.8407	35.5854	26.4361
RLTA1_RS19740	1.24268	5.16291	2.27436e-13	6.35182e-11	883	858	697	425	398	338	56.7602	51.9901	42.0932	24.351	19.1911	20.2158
RLTA1_RS23165	1.19117	7.66289	3.26165e-13	8.75879e-11	4844	4197	4631	2312	2582	1893	311.378	254.315	279.675	132.469	124.501	113.22
RLTA1_RS26875	1.19893	7.49901	4.0931e-13	1.05845e-10	3960	4104	4182	2156	2320	1568	254.553	248.68	252.559	123.531	111.867	93.7822
RLTA1_RS14845	1.60818	10.093	1.67584e-12	4.17882e-10	26484	25145	28287	12225	9059	8047	1702.42	1523.65	1708.31	700.449	436.814	481.292
RLTA1_RS09995	-1.03052	4.20066	1.93912e-12	4.6686e-10	199	199	184	390	549	411	12.7919	12.0583	11.1121	22.3456	26.4721	24.5819
RLTA1_RS34895	0.889688	5.2933	5.75062e-12	1.33836e-09	744	869	861	472	550	481	47.8252	52.6566	51.9975	27.0439	26.5203	28.7686
RLTA1_RS20855	-1.1986	6.54338	7.03118e-12	1.5836e-09	937	843	964	1861	3039	2272	60.2314	51.0812	58.2179	106.629	146.537	135.888
RLTA1_RS34310	0.982611	4.04853	1.04706e-11	2.28455e-09	363	354	345	212	215	179	23.3341	21.4505	20.8352	12.1468	10.367	10.706
RLTA1_RS29615	1.0662	3.73373	3.17831e-11	6.72454e-09	308	291	270	168	171	130	19.7986	17.633	16.3058	9.62581	8.24541	7.77531
RLTA1_RS32075	1.02429	6.06822	4.14346e-11	8.50872e-09	1537	1502	1322	812	967	658	98.8001	91.0129	79.8382	46.5247	46.6275	39.355
RLTA1_RS23015	1.16441	6.98428	5.16535e-11	1.03041e-08	2267	3412	2857	1441	1611	1237	145.725	206.748	172.54	82.5642	77.6804	73.9851
RLTA1_RS19735	1.22716	7.54506	7.33895e-11	1.42335e-08	4714	3845	4122	2304	2085	1718	303.021	232.986	248.936	132.011	100.536	102.754
RLTA1_RS26880	1.2154	7.60928	8.11256e-11	1.53086e-08	4323	4295	4645	2435	2475	1566	277.887	260.253	280.521	139.517	119.341	93.6626
RLTA1_RS20760	0.901045	6.24044	1.14655e-10	2.10664e-08	1444	1642	1702	954	1016	910	92.822	99.4962	102.787	54.6608	48.9902	54.4272
RLTA1_RS17025	-1.21757	6.26618	2.38542e-10	4.27052e-08	797	671	773	2332	1932	1597	51.2321	40.6589	46.683	133.615	93.1586	95.5167
RLTA1_RS07700	-1.02305	7.38036	3.72923e-10	6.50937e-08	1726	1683	1928	3589	5258	3513	110.949	101.981	116.436	205.637	253.534	210.113
RLTA1_RS13105	1.01799	5.87089	6.5474e-10	1.11497e-07	998	1426	1394	633	855	642	64.1526	86.4078	84.1864	36.2687	41.227	38.3981
RLTA1_RS23180	1.04129	7.17359	7.15256e-10	1.18903e-07	3032	3402	3007	1771	1641	1715	194.9	206.142	181.599	101.472	79.127	102.574
RLTA1_RS29630	1.16391	9.31325	7.53662e-10	1.22374e-07	14236	13601	14896	8081	6939	6356	915.106	824.146	899.599	463.013	334.59	380.153
RLTA1_RS19670	-1.08893	7.85752	1.29886e-09	2.06106e-07	2256	2313	2641	5100	5754	6292	145.018	140.155	159.495	292.212	277.451	376.325
RLTA1_RS29620	1.25927	8.40027	1.41611e-09	2.19717e-07	8912	7545	6616	4116	3864	2927	572.873	457.185	399.553	235.832	186.317	175.064
RLTA1_RS06905	0.931444	5.97777	2.26236e-09	3.43386e-07	1153	1579	1291	730	954	703	74.1162	95.6787	77.9661	41.8264	46.0007	42.0465
RLTA1_RS14995	0.887555	6.7032	2.93973e-09	4.30924e-07	1955	2407	2219	1336	1555	1131	125.67	145.851	134.01	76.5481	74.9802	67.6452
RLTA1_RS24030	-0.880077	6.15777	2.96253e-09	4.30924e-07	847	720	868	1668	1873	1523	54.4461	43.628	52.4203	95.5705	90.3137	91.0907
RLTA1_RS10055	1.81538	6.38574	3.08735e-09	4.39916e-07	1919	1873	2544	746	990	341	123.356	113.493	153.637	42.7432	47.7366	20.3952
RLTA1_RS12540	0.828347	4.80975	3.21029e-09	4.48285e-07	576	587	576	311	466	336	37.0259	35.569	34.7858	17.8192	22.4699	20.0962
RLTA1_RS29850	1.7223	5.47974	3.97057e-09	5.43579e-07	1388	991	928	365	276	469	89.2222	60.0491	56.0438	20.9132	13.3084	28.0509
RLTA1_RS32080	1.17045	8.52538	5.00131e-09	6.71521e-07	8988	7961	7788	4574	4922	3018	577.759	482.393	470.333	262.074	237.333	180.507
RLTA1_RS23070	0.970084	3.82127	5.20056e-09	6.72414e-07	324	294	285	146	191	183	20.8271	17.8148	17.2117	8.36528	9.20978	10.9452
RLTA1_RS32895	0.770139	5.46797	5.17857e-09	6.72414e-07	867	858	983	593	654	543	55.7317	51.9901	59.3653	33.9768	31.5351	32.4769
RLTA1_RS06710	-1.03481	7.62679	5.67189e-09	7.20021e-07	2192	1875	2221	5280	5474	3842	140.904	113.615	134.131	302.525	263.949	229.79
RLTA1_RS28065	0.743261	5.69483	6.56577e-09	8.1861e-07	1026	1067	1054	648	820	658	65.9524	64.6543	63.6532	37.1281	39.5394	39.355
RLTA1_RS14850	1.28035	11.1382	7.12286e-09	8.72488e-07	51417	46955	56773	28862	24101	18857	3305.14	2845.21	3428.63	1653.69	1162.12	1127.84
RLTA1_RS29625	1.12658	8.78038	1.0611e-08	1.27734e-06	10629	9373	9240	5784	5376	3979	683.244	567.952	558.022	331.403	259.224	237.984
RLTA1_RS34290	0.995317	6.44939	1.18987e-08	1.40807e-06	2140	1679	1815	1076	1068	1035	137.562	101.738	109.611	61.651	51.4976	61.9034
RLTA1_RS13985	0.889122	6.58765	1.24411e-08	1.424e-06	1836	2261	1977	1313	1291	1082	118.02	137.004	119.395	75.2303	62.2504	64.7145
RLTA1_RS15450	-0.828554	4.31325	1.23288e-08	1.424e-06	243	228	219	477	520	390	15.6203	13.8155	13.2258	27.3304	25.0737	23.3259
RLTA1_RS04210	-0.833925	5.38979	1.35016e-08	1.49632e-06	464	500	496	795	1204	952	29.8264	30.2972	29.9544	45.5507	58.0554	56.9392
RLTA1_RS34385	0.795413	6.80309	1.34612e-08	1.49632e-06	2217	2350	2316	1439	1626	1403	142.511	142.397	139.868	82.4496	78.4037	83.9135
RLTA1_RS07715	-0.941871	6.23354	1.42584e-08	1.5555e-06	847	738	912	1602	2358	1517	54.4461	44.7187	55.0775	91.7889	113.7	90.7319
RLTA1_RS34410	0.871537	6.32645	1.62206e-08	1.74234e-06	1853	1642	1531	966	1172	972	119.113	99.4962	92.4601	55.3484	56.5124	58.1354
RLTA1_RS21930	-0.987616	5.35241	1.73068e-08	1.83085e-06	380	501	448	819	1034	1097	24.4268	30.3578	27.0556	46.9258	49.8582	65.6117
RLTA1_RS27300	0.92757	6.11441	1.78397e-08	1.85905e-06	1297	1569	1552	813	1156	680	83.3726	95.0728	93.7284	46.582	55.7409	40.6708
RLTA1_RS12985	1.17057	6.09878	2.18501e-08	2.24349e-06	1182	1855	1590	757	694	829	75.9803	112.403	96.0233	43.3734	33.4638	49.5826
RLTA1_RS13980	1.86663	7.71848	2.27153e-08	2.29852e-06	4805	6040	5244	2509	1489	942	308.871	365.991	316.696	143.757	71.7977	56.3411
RLTA1_RS17160	-0.893714	5.76056	2.33647e-08	2.33046e-06	542	616	684	1050	1652	1187	34.8404	37.3262	41.3081	60.1613	79.6574	70.9946
RLTA1_RS16725	0.78802	5.97935	2.54403e-08	2.50175e-06	1108	1367	1413	815	969	756	71.2235	82.8327	85.3339	46.6966	46.724	45.2164
RLTA1_RS07705	-0.996353	8.75115	2.66165e-08	2.57468e-06	5104	4120	4722	9181	12687	9758	328.091	249.649	285.171	526.039	611.751	583.627
RLTA1_RS20755	1.31838	10.1774	2.69194e-08	2.57468e-06	25840	25976	28548	15518	11177	9371	1661.02	1574	1724.07	889.126	538.941	560.48
RLTA1_RS16800	0.796665	6.34602	2.8307e-08	2.67081e-06	1554	1843	1621	1059	1288	925	99.8929	111.676	97.8954	60.677	62.1057	55.3243
RLTA1_RS34270	1.01609	8.83484	2.94524e-08	2.74182e-06	11016	9032	9564	5662	6467	4515	708.121	547.289	577.589	324.413	311.831	270.042
RLTA1_RS06920	-1.20965	4.83388	3.05101e-08	2.80292e-06	267	240	325	510	1028	667	17.1631	14.5427	19.6274	29.2212	49.5689	39.8933
RLTA1_RS33555	-1.28258	5.1974	3.44843e-08	3.12687e-06	459	285	283	781	1128	939	29.505	17.2694	17.0909	44.7485	54.3907	56.1617
RLTA1_RS06355	-0.981464	7.55063	3.57762e-08	3.20242e-06	2226	1714	2168	4062	5607	4062	143.09	103.859	130.93	232.738	270.363	242.949
RLTA1_RS18710	-0.962048	2.9883	4.30043e-08	3.80071e-06	73	87	97	183	191	188	4.69252	5.27172	5.85802	10.4853	9.20978	11.2443
RLTA1_RS32810	-0.77332	5.49434	4.88397e-08	4.20986e-06	525	518	569	884	1182	1044	33.7476	31.3879	34.363	50.6501	56.9946	62.4417
RLTA1_RS33015	0.733777	4.7141	4.84927e-08	4.20986e-06	468	562	561	320	419	341	30.0836	34.0541	33.8799	18.3349	20.2037	20.3952
RLTA1_RS28060	0.756927	5.29182	4.96935e-08	4.23122e-06	723	805	863	483	671	453	46.4753	48.7786	52.1183	27.6742	32.3548	27.094
RLTA1_RS33005	1.15246	8.51925	5.35907e-08	4.50808e-06	5885	9745	9095	3765	5229	3595	378.294	590.493	549.265	215.721	252.136	215.017
RLTA1_RS17135	0.721728	5.75678	5.77342e-08	4.79881e-06	1083	1036	1147	734	852	654	69.6165	62.7759	69.2696	42.0556	41.0824	39.1158
RLTA1_RS01875	-0.79408	5.76054	6.05151e-08	4.97078e-06	631	607	684	1067	1570	1151	40.5614	36.7809	41.3081	61.1353	75.7034	68.8414
RLTA1_RS23810	0.726977	5.37219	8.20709e-08	6.60149e-06	742	875	892	586	639	485	47.6966	53.0202	53.8697	33.5757	30.8118	29.0079
RLTA1_RS23965	-0.735264	5.66135	8.22586e-08	6.60149e-06	562	611	670	1012	1357	1099	36.126	37.0232	40.4626	57.984	65.4328	65.7313
RLTA1_RS26910	0.731343	5.17021	8.63469e-08	6.77386e-06	633	757	794	443	595	450	40.69	45.87	47.9512	25.3823	28.6902	26.9145
RLTA1_RS28970	0.896867	5.39948	8.57055e-08	6.77386e-06	789	874	1006	458	553	593	50.7178	52.9596	60.7543	26.2418	26.665	35.4674
RLTA1_RS34285	0.827416	6.97755	9.41001e-08	7.30008e-06	2681	2765	2375	1541	1807	1621	172.338	167.544	143.431	88.2938	87.1313	96.9521
RLTA1_RS17700	-1.00514	5.59753	9.52644e-08	7.30919e-06	596	452	507	1155	1101	1239	38.3116	27.3887	30.6187	66.1774	53.0888	74.1047
RLTA1_RS20550	-0.834248	6.12296	1.0093e-07	7.65969e-06	812	698	918	1547	1754	1574	52.1963	42.295	55.4399	88.6376	84.5757	94.1411
RLTA1_RS23060	-0.804905	4.01903	1.05013e-07	7.82532e-06	175	171	223	353	435	336	11.2492	10.3617	13.4674	20.2257	20.9752	20.0962
RLTA1_RS25910	-1.15868	5.66048	1.05354e-07	7.82532e-06	646	407	454	1388	1375	1055	41.5256	24.662	27.418	79.5275	66.3008	63.0996
RLTA1_RS05790	1.02587	9.67922	1.0828e-07	7.958e-06	14990	19854	18745	10105	12146	7613	963.574	1203.04	1132.05	578.981	585.665	455.334
RLTA1_RS34355	1.16401	10.7734	1.11233e-07	8.08991e-06	39284	40666	37615	23212	17374	17935	2525.22	2464.14	2271.64	1329.97	837.753	1072.69
RLTA1_RS05060	-0.777719	4.52438	1.15107e-07	8.28532e-06	246	287	287	453	671	473	15.8132	17.3906	17.3325	25.9553	32.3548	28.2902
RLTA1_RS18660	1.63012	1.64048	1.30112e-07	9.26509e-06	59	94	71	27	19	34	3.79259	5.69588	4.28783	1.547	0.916156	2.03354
RLTA1_RS28380	0.835718	8.00756	1.31373e-07	9.26509e-06	4666	5877	5518	3256	4035	2895	299.936	356.114	333.243	186.557	194.563	173.15
RLTA1_RS29930	0.703478	4.81561	1.37973e-07	9.63327e-06	538	562	591	391	398	377	34.5833	34.0541	35.6917	22.4029	19.1911	22.5484
RLTA1_RS09745	0.855767	6.57121	1.4506e-07	1.00278e-05	2115	1935	1888	1116	1600	1032	135.955	117.25	114.02	63.9428	77.15	61.724
RLTA1_RS34390	0.970344	3.78602	1.67615e-07	1.14734e-05	322	299	260	130	206	174	20.6985	18.1178	15.7019	7.44854	9.93306	10.407
RLTA1_RS27350	0.778415	5.98057	1.71782e-07	1.16445e-05	1228	1271	1376	823	1072	676	78.9372	77.0156	83.0994	47.155	51.6905	40.4316
RLTA1_RS12165	0.895046	3.48555	1.77943e-07	1.19462e-05	244	255	203	124	158	144	15.6846	15.4516	12.2596	7.10476	7.61856	8.61265
RLTA1_RS24660	-0.859535	6.81853	1.86318e-07	1.23893e-05	1324	1116	1450	2480	2860	2609	85.1082	67.6235	87.5684	142.095	137.906	156.044
RLTA1_RS34900	0.740822	6.50051	2.18907e-07	1.44189e-05	1853	1927	1717	1228	1373	1114	119.113	116.766	103.693	70.3601	66.2043	66.6284
RLTA1_RS23255	0.902812	7.62168	2.29716e-07	1.49895e-05	4573	3793	4071	2656	2851	2039	293.958	229.835	245.856	152.179	137.472	121.953
RLTA1_RS11935	0.710998	4.3407	2.57145e-07	1.64898e-05	363	447	409	270	303	265	23.3341	27.0857	24.7003	15.47	14.6103	15.8497
RLTA1_RS23590	0.909346	5.20849	2.57432e-07	1.64898e-05	824	673	840	536	464	399	52.9677	40.7801	50.7293	30.7109	22.3735	23.8642
RLTA1_RS12190	1.42634	6.96678	2.7595e-07	1.71067e-05	2714	3743	2409	1552	1445	749	174.459	226.805	145.484	88.9241	69.6761	44.7977
RLTA1_RS17995	0.850769	3.21333	2.76863e-07	1.71067e-05	161	212	203	122	135	103	10.3493	12.846	12.2596	6.99017	6.50953	6.16044
RLTA1_RS23160	0.924208	9.7637	2.75649e-07	1.71067e-05	18167	18121	19036	11442	10633	10560	1167.8	1098.03	1149.62	655.586	512.71	631.594
RLTA1_RS27345	0.802698	6.99027	2.7167e-07	1.71067e-05	2635	2515	2696	1740	2002	1363	169.381	152.395	162.817	99.6958	96.5339	81.5211
RLTA1_RS19195	-1.33719	6.92777	3.36798e-07	2.06274e-05	1287	1241	810	3750	3741	2129	82.7298	75.1978	48.9175	214.862	180.386	127.336
RLTA1_RS18655	1.11086	3.14011	3.40808e-07	2.06915e-05	186	173	222	123	112	69	11.9563	10.4828	13.407	7.04746	5.4005	4.1269
RLTA1_RS00415	-1.1401	8.93774	3.596e-07	2.16442e-05	4805	4890	5180	8816	13460	14532	308.871	296.307	312.831	505.126	649.024	869.16
RLTA1_RS04350	-0.900635	4.57542	3.74312e-07	2.23372e-05	266	233	304	452	746	512	17.0988	14.1185	18.3592	25.898	35.9712	30.6228
RLTA1_RS07710	-0.920388	8.60769	3.77544e-07	2.23391e-05	4842	3697	4530	8793	11023	8284	311.249	224.018	273.576	503.808	531.515	495.467
RLTA1_RS30615	0.692551	4.73284	4.25134e-07	2.49435e-05	459	544	592	362	421	330	29.505	32.9634	35.7521	20.7413	20.3001	19.7373
RLTA1_RS34045	-1.16939	9.00773	4.37567e-07	2.54591e-05	6068	3933	5330	14690	13095	11105	390.058	238.318	321.889	841.685	631.425	664.191
RLTA1_RS17240	0.695452	5.83282	4.7713e-07	2.75316e-05	1069	1140	1214	686	933	770	68.7165	69.0777	73.3159	39.3054	44.9881	46.0538
RLTA1_RS35780	-0.991856	9.88699	4.83124e-07	2.7649e-05	10219	9113	11449	21640	22463	24355	656.889	552.198	691.428	1239.9	1083.14	1456.67
RLTA1_RS06715	-0.681683	5.35297	5.2932e-07	3.00465e-05	482	482	557	810	1054	891	30.9835	29.2065	33.6383	46.4101	50.8226	53.2908
RLTA1_RS20860	-0.920953	6.85465	5.5558e-07	3.12827e-05	1475	1178	1217	2293	3128	2869	94.8147	71.3803	73.4971	131.381	150.828	171.595
RLTA1_RS29840	1.44093	6.20889	6.0059e-07	3.35466e-05	1771	1846	1630	725	476	919	113.842	111.857	98.4389	41.5399	22.9521	54.9655
RLTA1_RS01445	0.635213	4.62392	6.0729e-07	3.36516e-05	489	480	483	329	403	325	31.4335	29.0854	29.1693	18.8505	19.4322	19.4383
RLTA1_RS20865	-0.839342	9.77457	6.15843e-07	3.38568e-05	10178	9871	10455	18151	23872	19720	654.253	598.128	631.398	1039.99	1151.08	1179.45
RLTA1_RS23955	-0.842056	5.11387	6.6267e-07	3.61466e-05	337	435	431	653	896	873	21.6627	26.3586	26.0289	37.4146	43.204	52.2142
RLTA1_RS34705	0.655563	6.18069	7.07421e-07	3.82885e-05	1388	1411	1510	999	1165	926	89.2222	85.4988	91.1919	57.2392	56.1748	55.3841
RLTA1_RS02835	-0.988203	6.79972	7.3406e-07	3.94247e-05	1252	1082	1286	2779	3559	1887	80.48	65.5632	77.6641	159.227	171.611	112.862
RLTA1_RS11215	0.701312	5.15371	7.48461e-07	3.98913e-05	613	741	788	458	529	492	39.4043	44.9005	47.5889	26.2418	25.5077	29.4266
RLTA1_RS18600	-0.697493	5.66348	8.06232e-07	4.21263e-05	575	600	701	1003	1362	1077	36.9617	36.3567	42.3348	57.4683	65.6739	64.4154
RLTA1_RS23140	0.789442	3.04088	8.08496e-07	4.21263e-05	176	161	164	105	127	96	11.3135	9.75571	9.90429	6.01613	6.12378	5.74177
RLTA1_RS26905	0.762132	3.8488	8.03221e-07	4.21263e-05	257	292	328	193	197	190	16.5203	17.6936	19.8086	11.0582	9.49909	11.3639
RLTA1_RS23105	0.819239	6.19343	8.31701e-07	4.30143e-05	1404	1683	1453	892	1286	760	90.2507	101.981	87.7496	51.1084	62.0093	45.4557
RLTA1_RS12310	0.64272	5.92779	8.93742e-07	4.58831e-05	1156	1231	1216	858	998	754	74.309	74.5918	73.4367	49.1604	48.1223	45.0968
RLTA1_RS15390	-0.828807	6.84373	9.81072e-07	4.99989e-05	1445	1233	1330	2485	3460	2191	92.8862	74.713	80.3214	142.382	166.837	131.044
RLTA1_RS28770	-0.949879	3.87962	1.05885e-06	5.35715e-05	133	201	150	298	468	299	8.54939	12.1795	9.0588	17.0743	22.5664	17.8832
RLTA1_RS12990	0.96123	6.79315	1.08108e-06	5.4303e-05	2222	2753	2147	1355	1229	1485	142.833	166.817	129.662	77.6367	59.2608	88.818
RLTA1_RS07630	-0.738565	5.36975	1.18146e-06	5.8921e-05	536	466	496	865	972	973	34.4547	28.237	29.9544	49.5614	46.8686	58.1952
RLTA1_RS28070	0.727844	5.14223	1.20099e-06	5.94703e-05	671	804	662	430	622	416	43.1326	48.718	39.9795	24.6375	29.9921	24.881
RLTA1_RS09635	0.773719	7.98571	1.22761e-06	6.03602e-05	4657	5812	5096	3165	4182	2977	299.357	352.175	307.758	181.343	201.651	178.055
RLTA1_RS21630	-1.05291	3.63191	1.26273e-06	6.16528e-05	125	154	108	233	323	346	8.03514	9.33155	6.52234	13.3501	15.5747	20.6943
RLTA1_RS23960	-0.779846	4.26552	1.42307e-06	6.89993e-05	216	249	218	373	472	473	13.8847	15.088	13.1655	21.3716	22.7592	28.2902
RLTA1_RS34275	0.800249	6.98238	1.60854e-06	7.74538e-05	2787	2586	2414	1505	1775	1752	179.152	156.697	145.786	86.2312	85.5883	104.787
RLTA1_RS13625	0.646701	5.55904	1.75085e-06	8.37289e-05	852	961	982	674	791	556	54.7675	58.2313	59.3049	38.6178	38.141	33.2544
RLTA1_RS10120	1.48171	7.56353	1.81565e-06	8.56546e-05	3900	5246	4420	2524	2004	968	250.696	317.879	266.933	144.616	96.6304	57.8962
RLTA1_RS29845	1.56226	6.23253	1.80973e-06	8.56546e-05	2042	1914	1484	727	420	873	131.262	115.978	89.6217	41.6545	20.2519	52.2142
RLTA1_RS11795	0.705543	6.56898	1.91764e-06	8.926e-05	1834	2068	1815	1356	1497	1111	117.892	125.309	109.611	77.694	72.1835	66.449
RLTA1_RS13405	0.857261	7.23535	1.9104e-06	8.926e-05	2652	3569	3237	1967	2471	1496	170.474	216.262	195.489	112.702	119.149	89.4759
RLTA1_RS34370	0.969132	2.74876	1.96218e-06	9.07283e-05	120	157	151	62	94	90	7.71374	9.51334	9.11919	3.55238	4.53256	5.38291
RLTA1_RS02295	-0.809365	7.05737	2.022e-06	9.28789e-05	1770	1366	1548	3064	3351	2861	113.778	82.7721	93.4868	175.556	161.581	171.117
RLTA1_RS21310	-0.968067	6.39586	2.08322e-06	9.50658e-05	1029	769	958	2343	2256	1516	66.1453	46.5972	57.8555	134.246	108.781	90.6721
RLTA1_RS07325	-0.800612	4.75921	2.13028e-06	9.61364e-05	251	350	357	547	669	654	16.1346	21.2081	21.5599	31.3412	32.2583	39.1158
RLTA1_RS18200	0.80267	8.12733	2.13422e-06	9.61364e-05	5853	5441	5964	3473	4813	3010	376.237	329.695	360.178	198.991	232.077	180.028
RLTA1_RS23235	0.973339	2.01948	2.16704e-06	9.69891e-05	72	93	91	46	57	44	4.62824	5.63529	5.49567	2.63564	2.74847	2.63164
RLTA1_RS12380	-1.23901	7.20372	2.38955e-06	0.000105787	1602	1164	1480	4296	4961	2259	102.978	70.532	89.3802	246.146	239.213	135.111
RLTA1_RS25710	-0.751341	7.31948	2.39391e-06	0.000105787	2107	1802	1858	3394	4094	3491	135.44	109.191	112.208	194.464	197.408	208.797
RLTA1_RS10050	1.30483	6.14498	2.57545e-06	0.000113093	1764	1250	1869	786	1065	431	113.392	75.7431	112.873	45.035	51.353	25.7781
RLTA1_RS22005	0.664016	5.96981	2.67468e-06	0.000116716	1085	1293	1360	839	1063	768	69.745	78.3487	82.1331	48.0717	51.2565	45.9341
RLTA1_RS04700	0.791098	8.10804	2.7235e-06	0.000117628	5090	6590	5337	3749	3843	3445	327.191	399.318	322.312	214.804	185.305	206.046
RLTA1_RS12160	0.841472	8.51256	2.72926e-06	0.000117628	7705	6352	8708	4699	5262	4376	495.286	384.896	525.893	269.236	253.727	261.729
RLTA1_RS01765	-0.764441	5.50762	2.75914e-06	0.000118186	488	504	644	859	1268	1018	31.3692	30.5396	38.8924	49.2177	61.1414	60.8867
RLTA1_RS00420	0.772395	7.2255	2.93033e-06	0.000124753	2730	3031	3426	2079	2418	1599	175.488	183.662	206.903	119.119	116.593	95.6363
RLTA1_RS28975	0.662912	5.36003	2.97533e-06	0.000125902	763	815	866	483	728	541	49.0465	49.3845	52.2995	27.6742	35.1032	32.3572
RLTA1_RS28075	0.68454	6.36471	3.02966e-06	0.000127428	1600	1809	1524	1123	1372	985	102.85	109.615	92.0374	64.3439	66.1561	58.9129
RLTA1_RS02775	0.705071	6.06815	3.11249e-06	0.000130128	1148	1433	1466	907	956	917	73.7947	86.8319	88.5347	51.9679	46.0971	54.8458
RLTA1_RS33010	0.591638	5.08909	3.35734e-06	0.000139529	637	710	637	489	552	445	40.9471	43.0221	38.4697	28.018	26.6167	26.6155
RLTA1_RS12895	0.891884	3.51405	3.51898e-06	0.000145382	216	247	254	147	124	159	13.8847	14.9668	15.3396	8.42258	5.97912	9.5098
RLTA1_RS23090	0.774879	7.2466	3.59003e-06	0.000147444	3480	2878	2926	1830	2384	1941	223.698	174.391	176.707	104.853	114.953	116.091
RLTA1_RS17020	-1.85349	6.9084	3.71805e-06	0.00015181	985	714	817	4136	5137	1317	63.3169	43.2645	49.3403	236.978	247.7	78.7699
RLTA1_RS24115	-0.727061	8.29604	3.77973e-06	0.000153431	3847	3635	4013	6364	8530	6673	247.29	220.261	242.353	364.635	411.306	399.113
RLTA1_RS17370	-0.723198	6.69297	3.83898e-06	0.000154935	1359	1165	1257	2068	2749	2257	87.3581	70.5926	75.9127	118.489	132.553	134.991
RLTA1_RS04705	0.644588	5.37934	4.03385e-06	0.000161864	732	924	810	560	631	581	47.0538	55.9893	48.9175	32.086	30.426	34.7497
RLTA1_RS22260	-0.621085	5.63021	4.06909e-06	0.000162345	590	656	647	1098	1290	910	37.9259	39.75	39.0736	62.9115	62.2022	54.4272
RLTA1_RS28830	-0.708963	5.04797	4.09435e-06	0.000162425	398	409	408	594	877	774	25.5839	24.7831	24.6399	34.0341	42.2878	46.293
RLTA1_RS07580	0.823387	6.46063	4.12021e-06	0.000162527	1960	1785	1709	1295	1330	874	125.991	108.161	103.21	74.1989	64.1309	52.274
RLTA1_RS01685	0.628207	5.54264	4.16104e-06	0.000163215	846	894	1009	678	766	566	54.3818	54.1715	60.9355	38.847	36.9356	33.8525
RLTA1_RS07420	0.647976	5.24235	4.1861e-06	0.000163281	815	699	722	516	601	497	52.3891	42.3556	43.603	29.565	28.9795	29.7256
RLTA1_RS02830	-0.660957	4.39902	4.21469e-06	0.000163483	277	244	267	466	490	447	17.8059	14.7851	16.1247	26.7002	23.6272	26.7351
RLTA1_RS03575	-0.693559	5.87619	4.3099e-06	0.000165339	746	632	796	1322	1419	1222	47.9537	38.2957	48.072	75.7459	68.4224	73.0879
RLTA1_RS23130	0.787313	5.2169	4.29539e-06	0.000165339	864	757	656	468	633	406	55.5389	45.87	39.6171	26.8147	30.5225	24.2829
RLTA1_RS29835	0.947982	7.18551	4.4885e-06	0.000170319	3062	2866	3385	1806	1538	2014	196.829	173.664	204.427	103.477	74.1604	120.457
RLTA1_RS34710	0.664048	6.71072	4.48782e-06	0.000170319	1884	2177	2185	1496	1688	1268	121.106	131.914	131.957	85.7155	81.3932	75.8392
RLTA1_RS01760	-0.713011	5.18594	4.80488e-06	0.000181339	387	469	482	662	992	825	24.8768	28.4188	29.1089	37.9303	47.833	49.3433
RLTA1_RS23340	-0.670402	3.24777	4.90373e-06	0.000184075	114	116	121	203	236	192	7.32805	7.02896	7.30743	11.6312	11.3796	11.4835
RLTA1_RS07135	0.622603	5.62871	5.09241e-06	0.000190135	932	951	1029	691	867	589	59.91	57.6254	62.1434	39.5919	41.8057	35.2281
RLTA1_RS27060	0.573139	4.89461	5.15455e-06	0.000191431	561	591	572	437	496	377	36.0617	35.8113	34.5442	25.0386	23.9165	22.5484
RLTA1_RS17695	-1.05969	8.7223	5.28332e-06	0.000195175	5458	3400	4378	10846	12583	8087	350.846	206.021	264.396	621.437	606.737	483.684
RLTA1_RS01170	-0.77979	4.09124	5.37711e-06	0.000197595	189	170	246	351	431	388	12.1491	10.3011	14.8564	20.1111	20.7823	23.2063
RLTA1_RS27515	-0.862643	6.72994	5.43683e-06	0.000198743	1176	1055	1426	2572	3140	1864	75.5946	63.9272	86.119	147.366	151.407	111.486
RLTA1_RS12530	-0.67728	5.65266	5.58635e-06	0.000203145	628	565	682	1167	1151	1051	40.3686	34.2359	41.1873	66.865	55.4998	62.8604
RLTA1_RS08335	0.901001	3.12674	5.64996e-06	0.000204394	165	201	182	117	94	116	10.6064	12.1795	10.9913	6.70369	4.53256	6.93797
RLTA1_RS15745	0.750248	7.62628	5.95495e-06	0.000214317	3617	4432	4009	2637	3371	2142	232.505	268.555	242.112	151.091	162.545	128.113
RLTA1_RS10705	1.21091	4.92388	5.98651e-06	0.000214348	582	809	670	442	373	192	37.4116	49.0209	40.4626	25.325	17.9856	11.4835
RLTA1_RS23795	0.659044	4.93825	6.46134e-06	0.000230169	519	650	655	435	523	350	33.3619	39.3864	39.5568	24.924	25.2184	20.9335
RLTA1_RS21975	-0.625815	4.32884	6.75452e-06	0.000239391	265	257	240	419	528	387	17.0345	15.5728	14.4941	24.0072	25.4595	23.1465
RLTA1_RS00820	0.809324	10.2212	6.87976e-06	0.000242598	23217	24221	26487	16111	19178	12608	1492.42	1467.66	1599.6	923.103	924.739	754.085
RLTA1_RS27860	0.625885	5.7135	7.02683e-06	0.000246539	927	1110	1057	738	778	733	59.5886	67.2599	63.8343	42.2848	37.5142	43.8408
RLTA1_RS33030	0.630408	6.00493	7.08788e-06	0.000247438	1147	1382	1263	851	995	908	73.7305	83.7416	76.2751	48.7593	47.9777	54.3075
RLTA1_RS12285	0.976211	7.51907	7.20381e-06	0.000250234	4459	3214	4107	2627	2090	1998	286.63	194.751	248.03	150.518	100.777	119.501
RLTA1_RS12640	0.688619	7.15437	7.4166e-06	0.00025635	2586	3076	2890	2057	2288	1653	166.231	186.389	174.533	117.859	110.324	98.8661
RLTA1_RS00860	0.716088	5.85733	8.11801e-06	0.000279211	1132	1232	1134	911	836	651	72.7662	74.6524	68.4845	52.1971	40.3109	38.9364
RLTA1_RS05615	0.771837	7.47539	8.24599e-06	0.000282223	3253	4203	3465	2161	2491	2513	209.107	254.679	209.258	123.818	120.113	150.303
RLTA1_RS25350	0.891461	7.80741	8.42852e-06	0.000287063	4318	4302	5543	2926	3725	2061	277.566	260.678	334.753	167.649	179.615	123.269
RLTA1_RS11620	0.713998	7.75157	8.62391e-06	0.000289481	4159	4354	4501	3223	3297	2439	267.345	263.828	271.824	184.666	158.977	145.877
RLTA1_RS28865	-0.624634	4.63264	8.57595e-06	0.000289481	271	329	345	499	601	539	17.4202	19.9356	20.8352	28.5909	28.9795	32.2376
RLTA1_RS34795	0.589778	5.12719	8.59485e-06	0.000289481	618	739	681	473	550	500	39.7257	44.7793	41.1269	27.1012	26.5203	29.905
RLTA1_RS06080	-0.96872	3.18616	9.21942e-06	0.00030799	102	91	101	170	218	257	6.55668	5.5141	6.09959	9.7404	10.5117	15.3712
RLTA1_RS24110	-0.648649	5.87126	9.56986e-06	0.000318175	716	704	791	1175	1663	1109	46.0253	42.6585	47.7701	67.3233	80.1878	66.3294
RLTA1_RS17960	0.583335	5.16348	9.72782e-06	0.000321894	610	716	762	514	582	474	39.2115	43.3857	46.0187	29.4504	28.0633	28.35
RLTA1_RS12020	-0.803011	4.56064	9.82645e-06	0.000322105	315	253	260	559	682	409	20.2486	15.3304	15.7019	32.0287	32.8852	24.4623
RLTA1_RS28055	0.705591	7.15123	9.79322e-06	0.000322105	2690	3056	2820	1902	2498	1580	172.916	185.177	170.305	108.978	120.45	94.4999
RLTA1_RS01325	-0.785248	3.93202	1.00374e-05	0.000327482	186	178	175	398	391	263	11.9563	10.7858	10.5686	22.804	18.8535	15.73
RLTA1_RS03560	0.738443	7.31258	1.01593e-05	0.000329919	2885	3218	3570	2303	2557	1705	185.451	194.993	215.599	131.954	123.295	101.976
RLTA1_RS25090	0.847968	6.0997	1.03644e-05	0.000335019	1510	1501	1262	1066	912	698	97.0645	90.9523	76.2147	61.078	43.9755	41.7474
RLTA1_RS18280	0.658215	6.1276	1.06115e-05	0.000339867	1237	1443	1482	1068	1056	843	79.5158	87.4379	89.5009	61.1926	50.919	50.4199
RLTA1_RS23145	0.707037	6.8738	1.06117e-05	0.000339867	2619	2158	2268	1514	1860	1516	168.352	130.763	136.969	86.7468	89.6869	90.6721
RLTA1_RS23135	0.716532	7.27558	1.08181e-05	0.000344895	3467	2978	2887	1995	2509	1943	222.863	180.45	174.352	114.306	120.981	116.211
RLTA1_RS33020	0.600633	5.50857	1.11043e-05	0.000352411	929	885	844	632	789	569	59.7172	53.6261	50.9708	36.2114	38.0446	34.0319
RLTA1_RS11380	-1.06734	7.22461	1.17076e-05	0.000369874	1768	1216	1693	4317	4377	2481	113.649	73.6829	102.244	247.349	211.053	148.389
RLTA1_RS01865	-0.726085	5.74292	1.18305e-05	0.000372074	641	557	758	1115	1543	1026	41.2042	33.7511	45.7771	63.8856	74.4015	61.3651
RLTA1_RS25915	-1.00922	5.61758	1.25949e-05	0.00039434	645	403	523	1203	1578	854	41.4613	24.4196	31.585	68.9276	76.0892	51.0778
RLTA1_RS10575	0.624539	5.26441	1.28991e-05	0.000402061	806	777	674	508	648	504	51.8106	47.0819	40.7042	29.1066	31.2457	30.1443
RLTA1_RS17690	-0.872349	5.06944	1.3621e-05	0.000422673	382	434	331	574	1081	746	24.5554	26.298	19.9897	32.8882	52.1245	44.6183
RLTA1_RS25445	0.681647	7.24099	1.36964e-05	0.000423135	3016	2922	3110	1946	2209	2180	193.872	177.057	187.819	111.499	106.515	130.386
RLTA1_RS28385	0.635568	7.13009	1.39203e-05	0.000428158	2537	3009	2742	1866	2249	1899	163.081	182.329	165.595	106.915	108.444	113.579
RLTA1_RS22530	-0.582234	6.38058	1.55033e-05	0.000474754	1068	1058	1111	1780	2061	1636	68.6523	64.109	67.0955	101.988	99.3788	97.8493
RLTA1_RS24650	-0.953961	6.45988	1.64698e-05	0.000502148	1050	773	1079	2417	2509	1475	67.4952	46.8395	65.163	138.486	120.981	88.2199
RLTA1_RS00805	0.8078	9.32157	1.66292e-05	0.000504803	11951	12761	14928	8732	10498	6504	768.224	773.246	901.532	500.313	506.2	389.005
RLTA1_RS05065	-0.624493	5.92472	1.711e-05	0.000517152	787	750	779	1216	1705	1147	50.5893	45.4459	47.0454	69.6725	82.213	68.6022
RLTA1_RS29610	0.576493	5.3471	1.76926e-05	0.000532455	781	815	766	559	626	596	50.2036	49.3845	46.2603	32.0287	30.1849	35.6468
RLTA1_RS04830	0.581593	5.70011	1.78663e-05	0.000535375	963	1040	1022	795	798	681	61.9027	63.0183	61.7206	45.5507	38.4786	40.7307
RLTA1_RS30665	0.621904	6.47521	1.79987e-05	0.000537039	1785	1696	1751	1309	1463	1078	114.742	102.768	105.746	75.0011	70.544	64.4753
RLTA1_RS24965	-0.763669	2.89329	1.87375e-05	0.000556703	76	89	98	161	211	135	4.88537	5.39291	5.91842	9.22473	10.1742	8.07436
RLTA1_RS17375	-0.655603	7.98135	1.92433e-05	0.000569308	3205	3104	3218	4980	6732	5300	206.021	188.085	194.341	285.336	324.609	316.993
RLTA1_RS20280	0.544435	4.76822	2.017e-05	0.000594206	478	565	525	382	470	363	30.7264	34.2359	31.7058	21.8872	22.6628	21.7111
RLTA1_RS03260	0.728562	7.61746	2.08352e-05	0.000608665	3512	4564	3844	2749	2665	2630	225.755	276.553	232.147	157.508	128.503	157.3
RLTA1_RS22345	0.634241	6.48538	2.07672e-05	0.000608665	1596	1817	1886	1325	1301	1201	102.593	110.1	113.899	75.9178	62.7326	71.8319
RLTA1_RS07805	-0.901426	8.74414	2.10266e-05	0.0006117	5648	3772	5053	10827	10841	8895	363.06	228.562	305.161	620.349	522.739	532.011
RLTA1_RS23170	0.684809	5.52901	2.12253e-05	0.000614918	955	913	891	530	867	565	61.3885	55.3228	53.8093	30.3671	41.8057	33.7927
RLTA1_RS24470	-1.00652	8.46956	2.14646e-05	0.000617437	4314	2967	4130	10046	9840	6175	277.309	179.784	249.419	575.6	474.472	369.327
RLTA1_RS25440	0.656328	6.41447	2.14892e-05	0.000617437	1733	1496	1834	1154	1283	1179	111.399	90.6494	110.759	66.1201	61.8647	70.5161
RLTA1_RS34415	0.717013	4.19371	2.21904e-05	0.000634973	409	384	305	242	295	221	26.291	23.2683	18.4196	13.8657	14.2245	13.218
RLTA1_RS06725	-0.55515	5.18624	2.30654e-05	0.000654645	446	462	521	715	946	717	28.6694	27.9947	31.4642	40.967	45.6149	42.8838
RLTA1_RS21800	-0.571376	6.19515	2.30171e-05	0.000654645	873	960	1030	1528	1862	1420	56.1174	58.1707	62.2038	87.549	89.7833	84.9303
RLTA1_RS01870	-0.660359	5.32834	2.40824e-05	0.000680744	513	439	555	757	1115	835	32.9762	26.601	33.5176	43.3734	53.7639	49.9414
RLTA1_RS08845	0.637706	6.81506	2.45379e-05	0.000690822	2102	2156	2404	1695	1768	1367	135.119	130.642	145.182	97.1175	85.2507	81.7604
RLTA1_RS17715	0.687873	5.55743	2.57313e-05	0.000721509	929	976	913	631	614	708	59.7172	59.1402	55.1379	36.1541	29.6063	42.3455
RLTA1_RS17225	0.629427	5.75237	2.61443e-05	0.000730157	1002	995	1183	664	977	695	64.4097	60.2915	71.4437	38.0448	47.1097	41.568
RLTA1_RS17965	0.620481	4.02975	2.65167e-05	0.000737607	283	366	309	221	260	221	18.1916	22.1776	18.6611	12.6625	12.5369	13.218
RLTA1_RS33025	0.581269	5.83778	2.70682e-05	0.00074996	990	1110	1233	803	990	727	63.6383	67.2599	74.4633	46.0091	47.7366	43.4819
RLTA1_RS29165	0.602255	5.05764	2.72521e-05	0.000752071	614	712	621	461	487	490	39.4686	43.1433	37.5034	26.4137	23.4825	29.3069
RLTA1_RS06780	-0.837829	5.63524	2.75392e-05	0.000754299	578	524	625	1214	1543	779	37.1545	31.7515	37.745	69.5579	74.4015	46.592
RLTA1_RS20870	-0.716652	8.4434	2.75489e-05	0.000754299	4281	4018	4490	6652	10119	7170	275.188	243.469	271.16	381.136	487.926	428.838
RLTA1_RS25815	-0.597862	4.4062	2.76697e-05	0.000754648	260	270	285	394	577	429	16.7131	16.3605	17.2117	22.5748	27.8222	25.6585
RLTA1_RS26915	0.539438	4.79832	2.89583e-05	0.000786719	489	532	578	402	483	359	31.4335	32.2363	34.9066	23.0332	23.2897	21.4718
RLTA1_RS21885	-0.602335	6.56886	2.93568e-05	0.000794454	1127	1214	1322	1867	2359	2043	72.4448	73.5617	79.8382	106.972	113.748	122.192
RLTA1_RS02590	-1.01901	7.50297	3.00867e-05	0.000811064	2220	1597	1984	5354	5102	2931	142.704	96.7694	119.818	306.765	246.012	175.303
RLTA1_RS06265	-0.604055	6.61036	3.26903e-05	0.00087559	1233	1173	1357	2126	2305	2009	79.2586	71.0773	81.9519	121.812	111.144	120.158
RLTA1_RS12180	0.713975	3.6885	3.27312e-05	0.00087559	298	238	235	163	206	164	19.1558	14.4215	14.1921	9.33932	9.93306	9.80885
RLTA1_RS28780	-0.675098	3.38483	3.32413e-05	0.000885842	115	136	135	226	230	235	7.39233	8.24085	8.15292	12.949	11.0903	14.0554
RLTA1_RS15655	-0.695349	7.27682	3.4608e-05	0.000916824	1950	1797	1998	2830	4273	3452	125.348	108.888	120.663	162.149	206.039	206.464
RLTA1_RS33695	0.780371	8.65742	3.46665e-05	0.000916824	7140	8995	8724	6067	6120	4156	458.967	545.047	526.86	347.618	295.099	248.571
RLTA1_RS11090	-0.597759	6.79512	3.64371e-05	0.000960014	1441	1360	1486	2422	2796	2125	92.6291	82.4085	89.7425	138.772	134.82	127.096
RLTA1_RS25100	0.781863	6.84878	3.75363e-05	0.000985258	2383	2644	2046	1770	1496	1348	153.182	160.212	123.562	101.415	72.1352	80.624
RLTA1_RS23100	0.747773	4.26503	3.76853e-05	0.000985463	372	404	391	198	369	228	23.9126	24.4802	23.6133	11.3447	17.7927	13.6367
RLTA1_RS35190	0.645609	5.54922	3.80973e-05	0.000992519	821	865	1091	583	836	595	52.7748	52.4142	65.8877	33.4038	40.3109	35.587
RLTA1_RS22160	-0.577512	6.63743	3.91809e-05	0.00101696	1301	1298	1276	2147	2495	1903	83.6298	78.6517	77.0602	123.015	120.306	113.819
RLTA1_RS32815	-0.60909	6.36384	4.12692e-05	0.00106719	1008	1025	1133	1916	1852	1654	64.7954	62.1094	68.4241	109.78	89.3011	98.9259
RLTA1_RS15445	-1.27004	5.01249	4.45167e-05	0.00114692	391	200	318	929	1111	490	25.1339	12.1189	19.2047	53.2284	53.571	29.3069
RLTA1_RS02290	-0.772641	5.21617	4.56866e-05	0.00117273	465	364	498	869	1093	628	29.8907	22.0564	30.0752	49.7906	52.7031	37.5607
RLTA1_RS34305	0.676848	4.83367	4.62063e-05	0.00118173	607	529	561	454	431	315	39.0187	32.0545	33.8799	26.0126	20.7823	18.8402
RLTA1_RS03000	0.727401	6.46108	4.68844e-05	0.0011947	1716	1810	1809	1405	1110	1085	110.306	109.676	109.249	80.5015	53.5228	64.8939
RLTA1_RS04985	0.616581	5.89443	4.73493e-05	0.00120215	1121	1182	1192	918	827	807	72.0592	71.6227	71.9873	52.5981	39.8769	48.2667
RLTA1_RS07730	-0.662314	8.68226	4.84425e-05	0.00122545	5301	4732	5407	8553	10207	8822	340.754	286.733	326.54	490.057	492.169	527.644
RLTA1_RS15945	-0.673829	7.96441	4.94557e-05	0.00124657	3165	2924	3253	4691	6483	5672	203.45	177.178	196.455	268.778	312.602	339.243
RLTA1_RS21315	-0.613238	6.14984	5.02003e-05	0.00125627	923	793	1005	1563	1726	1410	59.3315	48.0514	60.694	89.5544	83.2256	84.3322
RLTA1_RS34360	0.939215	9.16915	5.00592e-05	0.00125627	12239	11398	13123	8454	5774	7040	786.737	690.656	792.524	484.384	278.415	421.063
RLTA1_RS30115	0.630855	6.93795	5.29196e-05	0.00131959	2096	2759	2397	1710	2067	1518	134.733	167.18	144.76	97.9769	99.6682	90.7917
RLTA1_RS02860	-0.685149	8.08336	5.43158e-05	0.00134841	3686	3044	3350	5367	6991	5989	236.94	184.45	202.313	307.51	337.097	358.203
RLTA1_RS18460	0.598495	4.44564	5.44617e-05	0.00134841	370	474	429	315	380	257	23.784	28.7218	25.9082	18.0484	18.3231	15.3712
RLTA1_RS05735	0.594079	7.06082	5.64642e-05	0.00139305	2377	2825	2609	1857	2322	1682	152.796	171.179	157.563	106.4	111.964	100.601
RLTA1_RS15540	0.59992	4.8296	5.74483e-05	0.0014113	499	594	569	360	432	438	32.0763	35.9931	34.363	20.6267	20.8305	26.1968
RLTA1_RS29815	-1.16837	6.84125	5.76082e-05	0.0014113	1533	819	1049	2477	4281	2123	98.543	49.6269	63.3512	141.923	206.424	126.977
RLTA1_RS18255	-0.789929	7.81642	5.84347e-05	0.00142157	2842	2335	2833	5754	6175	3826	182.687	141.488	171.091	329.684	297.751	228.833
RLTA1_RS27355	0.685483	4.50891	5.8358e-05	0.00142157	374	522	467	272	339	339	24.0411	31.6303	28.2031	15.5846	16.3462	20.2756
RLTA1_RS22670	1.27499	10.6768	5.86413e-05	0.00142165	44641	30012	37448	20596	23441	9386	2869.57	1818.56	2261.56	1180.08	1130.3	561.377
RLTA1_RS17380	-0.646295	8.01852	5.97921e-05	0.00144453	3151	3188	3485	4841	7000	5582	202.55	193.175	210.466	277.372	337.531	333.86
RLTA1_RS32795	0.718047	6.75227	6.0156e-05	0.00144831	1691	2575	2272	1386	1831	1281	108.699	156.031	137.211	79.4129	88.2885	76.6167
RLTA1_RS18375	0.648152	3.72759	6.08864e-05	0.00146085	231	301	250	158	225	181	14.8489	18.2389	15.098	9.05284	10.8492	10.8256
RLTA1_RS06965	0.657661	6.18941	6.18234e-05	0.00147826	1295	1514	1535	1038	1319	778	83.2441	91.7401	92.7017	59.4737	63.6005	46.5322
RLTA1_RS07120	-0.717076	6.78209	6.29372e-05	0.00149468	1500	1154	1376	2672	2526	2260	96.4217	69.926	83.0994	153.096	121.801	135.171
RLTA1_RS18205	0.588428	4.62551	6.29385e-05	0.00149468	502	504	428	348	432	303	32.2691	30.5396	25.8478	19.9392	20.8305	18.1225
RLTA1_RS17625	0.711012	6.51528	6.41934e-05	0.00151932	1859	1957	1694	1337	1150	1270	119.499	118.583	102.304	76.6054	55.4516	75.9588
RLTA1_RS02070	-0.639984	7.88182	6.47129e-05	0.00152644	3136	2801	3006	4669	6469	4715	201.586	169.725	181.538	267.517	311.927	282.004
RLTA1_RS29820	-1.24372	8.05455	6.67803e-05	0.0015699	3721	1660	2212	6494	6652	7158	239.19	100.587	133.587	372.083	320.751	428.121
RLTA1_RS22355	-0.51219	5.11201	6.81647e-05	0.00159707	468	444	467	743	817	661	30.0836	26.904	28.2031	42.5713	39.3947	39.5345
RLTA1_RS18275	-0.678718	8.34091	6.89631e-05	0.00161037	4050	3566	4492	6523	9002	6504	260.339	216.08	271.281	373.745	434.065	389.005
RLTA1_RS00975	0.626245	6.67599	7.04677e-05	0.00164002	1732	2231	2077	1459	1494	1428	111.335	135.186	125.434	83.5955	72.0388	85.4088
RLTA1_RS08445	-0.560554	4.14887	7.19408e-05	0.00166874	211	240	241	331	448	374	13.5633	14.5427	14.5545	18.9651	21.602	22.369
RLTA1_RS22810	-0.727611	5.21636	7.31379e-05	0.00168531	446	438	471	608	1121	829	28.6694	26.5404	28.4446	34.8362	54.0532	49.5826
RLTA1_RS27735	-1.15526	0.874362	7.31018e-05	0.00168531	15	17	19	42	41	45	0.964217	1.03011	1.14745	2.40645	1.97697	2.69145
RLTA1_RS13400	0.580982	6.32817	7.53094e-05	0.00172964	1489	1745	1443	1100	1283	1138	95.7146	105.737	87.1456	63.0261	61.8647	68.0639
RLTA1_RS01820	-0.536997	5.54818	7.59848e-05	0.00173943	593	575	683	927	1196	918	38.1187	34.8418	41.2477	53.1138	57.6696	54.9056
RLTA1_RS14990	0.690209	6.81999	7.98431e-05	0.00182178	1920	2480	2393	1442	2101	1257	123.42	150.274	144.518	82.6215	101.308	75.1813
RLTA1_RS10855	0.630644	6.25413	8.31489e-05	0.00189103	1299	1773	1440	1042	1147	1079	83.5012	107.434	86.9645	59.7029	55.3069	64.5351
RLTA1_RS29160	0.672781	4.16145	8.4829e-05	0.00192297	314	396	355	232	240	274	20.1843	23.9954	21.4392	13.2928	11.5725	16.388
RLTA1_RS30765	0.895508	3.79375	8.52405e-05	0.00192605	353	228	287	189	158	176	22.6912	13.8155	17.3325	10.829	7.61856	10.5266
RLTA1_RS06365	-0.701038	6.66914	9.10963e-05	0.00205172	1295	1156	1307	1811	2604	2478	83.2441	70.0472	78.9323	103.764	125.562	148.209
RLTA1_RS17440	0.547221	4.7336	9.25853e-05	0.00207856	474	503	555	349	500	342	30.4693	30.479	33.5176	19.9965	24.1094	20.455
RLTA1_RS23115	0.667662	7.94865	9.29305e-05	0.00207962	5311	4978	4410	3013	4303	3215	341.397	301.639	266.329	172.634	207.485	192.289
RLTA1_RS22735	-0.905182	8.33018	9.49123e-05	0.00211718	4011	2848	3998	8835	8839	5447	257.832	172.573	241.447	506.214	426.206	325.785
RLTA1_RS27425	-0.509936	4.5722	9.53437e-05	0.00212003	316	334	298	490	570	465	20.3128	20.2386	17.9968	28.0753	27.4847	27.8117
RLTA1_RS16510	0.490896	5.144	9.67569e-05	0.00214463	648	692	663	540	602	468	41.6542	41.9314	40.0399	30.9401	29.0277	27.9911
RLTA1_RS01530	-0.823944	4.81753	0.000100462	0.00221971	388	320	272	511	913	571	24.9411	19.3902	16.4266	29.2785	44.0237	34.1516
RLTA1_RS30280	-0.557231	3.57078	0.000101125	0.0022273	151	149	162	254	294	221	9.70645	9.02858	9.7835	14.5533	14.1763	13.218
RLTA1_RS02285	-0.545943	5.01188	0.000102458	0.00224956	437	414	417	612	764	711	28.0909	25.0861	25.1835	35.0654	36.8391	42.525
RLTA1_RS26210	0.547919	6.14637	0.000103768	0.00227118	1202	1489	1400	943	1223	993	77.2659	90.2252	84.5488	54.0306	58.9715	59.3914
RLTA1_RS07720	-0.785551	9.6717	0.000104434	0.00227862	10825	7691	10505	17218	22265	17325	695.843	466.032	634.418	986.53	1073.59	1036.21
RLTA1_RS11240	0.983847	10.2128	0.000105512	0.00228784	26384	22561	27583	18999	14304	10245	1695.99	1367.07	1665.79	1088.58	689.721	612.754
RLTA1_RS15080	0.555643	6.56677	0.000105409	0.00228784	1800	1796	1882	1345	1706	1182	115.706	108.828	113.658	77.0637	82.2612	70.6955
RLTA1_RS18270	-0.704434	8.90039	0.00010598	0.00229087	6434	4979	6205	10292	12750	9558	413.585	301.7	374.732	589.695	614.789	571.665
RLTA1_RS23200	0.61087	6.29242	0.000106646	0.00229109	1604	1354	1635	1179	1279	947	103.107	82.0449	98.7409	67.5525	61.6718	56.6401
RLTA1_RS29935	0.570296	6.03141	0.000106343	0.00229109	1084	1318	1401	907	1023	944	69.6808	79.8635	84.6092	51.9679	49.3278	56.4607
RLTA1_RS22475	-0.662373	8.79537	0.00010717	0.00229528	5475	5355	5885	9941	9798	9883	351.939	324.484	355.407	569.584	472.447	591.103
RLTA1_RS35935	-1.05419	2.24232	0.000108179	0.0023098	44	47	54	77	121	140	2.82837	2.84794	3.26117	4.41183	5.83447	8.37341
RLTA1_RS01285	0.508142	5.17897	0.000108839	0.00231681	641	724	699	566	608	464	41.2042	43.8704	42.214	32.4298	29.317	27.7519
RLTA1_RS03530	0.62637	5.7232	0.000110616	0.00234393	835	1126	1161	724	942	626	53.6747	68.2294	70.1151	41.4826	45.4221	37.4411
RLTA1_RS17245	0.561769	7.71832	0.000110784	0.00234393	3991	4045	4161	3046	3517	2775	256.546	245.105	251.291	174.525	169.585	165.973
RLTA1_RS08830	-0.509111	4.98831	0.00011274	0.00237811	403	445	420	662	702	663	25.9053	26.9646	25.3646	37.9303	33.8496	39.6541
RLTA1_RS24935	-0.764607	3.64412	0.000119003	0.00250265	126	136	184	318	322	216	8.09942	8.24085	11.1121	18.2203	15.5264	12.919
RLTA1_RS35045	0.623975	8.216	0.000120113	0.00251841	5205	6698	5650	3904	4860	4077	334.583	405.862	341.215	223.685	234.343	243.846
RLTA1_RS13975	1.135	7.93737	0.000121009	0.0025296	5541	5312	5502	4052	2611	1705	356.182	321.878	332.277	232.165	125.899	101.976
RLTA1_RS13860	0.936377	6.64247	0.000121973	0.00254213	1821	2595	1972	1579	1367	822	117.056	157.243	119.093	90.4711	65.915	49.1639
RLTA1_RS20185	-0.728682	5.69882	0.000124164	0.00258011	631	569	694	864	1575	1142	40.5614	34.4783	41.912	49.5041	75.9445	68.3031
RLTA1_RS07660	-0.643575	9.10394	0.000127246	0.00262075	6761	6951	7160	10338	14663	11922	434.605	421.192	432.407	592.331	707.032	713.056
RLTA1_RS10125	0.924209	3.73369	0.000127168	0.00262075	230	379	235	184	202	118	14.7847	22.9653	14.1921	10.5425	9.74019	7.05759
RLTA1_RS31180	-1.10129	4.60898	0.000126634	0.00262075	168	277	308	650	845	353	10.7992	16.7847	18.6007	37.2427	40.7448	21.113
RLTA1_RS11095	-1.26054	1.26822	0.000129799	0.00265765	11	34	20	49	70	57	0.707093	2.06021	1.20784	2.80753	3.37531	3.40917
RLTA1_RS24105	-0.585017	6.87505	0.000129425	0.00265765	1397	1446	1721	2287	3009	2440	89.8007	87.6196	103.935	131.037	145.09	145.937
RLTA1_RS00575	0.653168	5.8489	0.000130701	0.00266405	1194	1160	1061	733	1113	643	76.7517	70.2896	64.0759	41.9983	53.6675	38.4579
RLTA1_RS24730	0.564393	6.85824	0.000130875	0.00266405	2080	2357	2292	1614	1794	1700	133.705	142.821	138.418	92.4765	86.5044	101.677
RLTA1_RS00380	0.574758	7.19061	0.000133034	0.00270012	2478	3005	3025	2147	2414	1880	159.289	182.086	182.686	123.015	116.4	112.443
RLTA1_RS02570	0.533387	5.5129	0.000135289	0.00273793	742	976	908	659	771	615	47.6966	59.1402	54.8359	37.7584	37.1767	36.7832
RLTA1_RS23455	0.562981	6.36012	0.000135791	0.00274015	1377	1703	1687	1215	1417	1016	88.5151	103.192	101.881	69.6152	68.326	60.767
RLTA1_RS05730	0.86384	8.78819	0.000137258	0.00275384	8152	10419	9210	6922	6491	3860	524.02	631.334	556.21	396.606	312.988	230.867
RLTA1_RS35855	-0.571964	4.84049	0.000137183	0.00275384	412	338	362	582	761	538	26.4838	20.4809	21.8619	33.3465	36.6945	32.1778
RLTA1_RS20360	0.931435	1.77023	0.000140871	0.00281571	63	76	73	29	47	49	4.04971	4.60518	4.40862	1.6616	2.26628	2.93069
RLTA1_RS22405	-0.57894	7.03943	0.000141148	0.00281571	1675	1568	1879	2874	3099	2645	107.671	95.0122	113.477	164.67	149.43	158.198
RLTA1_RS02865	-0.594868	7.49549	0.000141983	0.00282429	2124	2442	2425	3369	4636	3918	136.533	147.972	146.451	193.032	223.542	234.336
RLTA1_RS34890	0.650189	4.43804	0.000146001	0.00289596	377	383	524	311	312	294	24.234	23.2077	31.6454	17.8192	15.0442	17.5842
RLTA1_RS12375	-0.797079	7.18458	0.000148541	0.002938	1965	1389	1789	3878	3356	2833	126.312	84.1658	108.041	222.196	161.822	169.442
RLTA1_RS09610	0.836676	3.95884	0.00015115	0.00298116	235	435	298	209	224	176	15.1061	26.3586	17.9968	11.975	10.801	10.5266
RLTA1_RS08690	-0.652464	4.01519	0.000153557	0.00301698	172	220	215	283	419	374	11.0564	13.3308	12.9843	16.2149	20.2037	22.369
RLTA1_RS28400	0.541114	4.84542	0.000154263	0.00301698	580	520	549	414	525	350	37.2831	31.5091	33.1552	23.7207	25.3148	20.9335
RLTA1_RS35170	0.522328	5.13955	0.000153857	0.00301698	685	699	629	548	591	446	44.0326	42.3556	37.9866	31.3985	28.4973	26.6753
RLTA1_RS11290	-0.519631	5.86905	0.000156796	0.00304945	724	767	840	1122	1407	1237	46.5395	46.476	50.7293	64.2866	67.8438	73.9851
RLTA1_RS20270	-0.512252	4.64125	0.000156499	0.00304945	328	305	361	509	581	508	21.0842	18.4813	21.8015	29.1639	28.0151	30.3835
RLTA1_RS34315	0.581765	6.38794	0.000159239	0.00308836	1594	1788	1492	1050	1508	1139	102.464	108.343	90.1049	60.1613	72.7139	68.1237
RLTA1_RS22020	0.538875	4.46101	0.000160191	0.00309821	436	402	423	327	333	316	28.0266	24.359	25.5458	18.7359	16.0568	18.9
RLTA1_RS32875	-0.582097	6.23153	0.000162504	0.00313426	962	954	1003	1749	1921	1286	61.8385	57.8071	60.5732	100.212	92.6282	76.9158
RLTA1_RS31175	-0.903601	6.54415	0.000164646	0.00316682	1040	917	1197	2615	2753	1365	66.8524	55.5652	72.2892	149.83	132.746	81.6408
RLTA1_RS23030	-0.692774	8.52119	0.000165142	0.00316765	4523	3898	5220	8258	10114	6695	290.744	236.197	315.246	473.154	487.684	400.428
RLTA1_RS02010	-0.697111	4.00891	0.000172698	0.00329448	187	179	226	300	500	298	12.0206	10.8464	13.6486	17.1889	24.1094	17.8234
RLTA1_RS21455	-0.718562	5.15745	0.000172625	0.00329448	459	402	443	938	935	565	29.505	24.359	26.7537	53.7441	45.0845	33.7927
RLTA1_RS00515	-0.67836	7.96389	0.000174678	0.00331413	3321	2680	3310	6115	5899	4792	213.478	162.393	199.897	350.368	284.442	286.61
RLTA1_RS06145	0.559189	7.45776	0.000174369	0.00331413	3170	3442	3571	2408	2797	2565	203.771	208.566	215.66	137.97	134.868	153.413
RLTA1_RS17720	0.683925	5.60626	0.000175362	0.00331811	995	1064	851	694	614	713	63.9597	64.4725	51.3936	39.7637	29.6063	42.6446
RLTA1_RS24600	-1.16999	5.435	0.000177927	0.00335753	471	371	443	1137	1692	537	30.2764	22.4806	26.7537	65.1461	81.5861	32.118
RLTA1_RS12535	0.645214	7.37412	0.000180997	0.00340625	3719	3059	3021	2298	2485	2283	239.062	185.359	182.444	131.667	119.824	136.546
RLTA1_RS01880	-0.620083	4.19148	0.00018263	0.00342776	182	245	270	369	496	348	11.6992	14.8457	16.3058	21.1424	23.9165	20.8139
RLTA1_RS02850	-0.566972	6.27025	0.000183341	0.00343186	1053	911	1050	1487	1889	1667	67.688	55.2016	63.4116	85.1998	91.0852	99.7034
RLTA1_RS24930	0.957555	8.3382	0.00018714	0.00349362	6084	6948	7772	5175	4480	2463	391.086	421.011	469.367	296.509	216.02	147.312
RLTA1_RS03695	-0.66073	7.33496	0.000190273	0.00354263	1965	2068	2043	3610	3300	3795	126.312	125.309	123.381	206.84	159.122	226.979
RLTA1_RS07695	-0.67708	9.95446	0.000194404	0.00360991	12988	10818	13245	19910	26132	21085	834.883	655.511	799.892	1140.77	1260.05	1261.1
RLTA1_RS11440	0.63997	8.83105	0.000195215	0.00361535	7801	8984	10237	6197	6823	6418	501.457	544.381	618.233	355.066	328.997	383.861
RLTA1_RS25945	0.518497	6.05379	0.000201771	0.00372689	1110	1302	1393	974	1088	926	71.3521	78.894	84.126	55.8068	52.462	55.3841
RLTA1_RS28870	-0.557231	6.85206	0.000202547	0.00373135	1503	1404	1630	2385	3028	2165	96.6145	85.0747	98.4389	136.652	146.006	129.489
RLTA1_RS13340	0.567594	4.20153	0.000205188	0.00377006	312	389	363	247	278	280	20.0557	23.5713	21.9223	14.1522	13.4048	16.7468
RLTA1_RS28910	-0.731157	6.05068	0.000208717	0.00381482	838	711	865	1648	1884	1042	53.8676	43.0827	52.2391	94.4246	90.8441	62.3221
RLTA1_RS29855	0.715228	4.90569	0.000208713	0.00381482	698	574	527	384	391	453	44.8682	34.7812	31.8266	22.0018	18.8535	27.094
RLTA1_RS22330	-0.580375	4.86072	0.000212312	0.0038704	322	398	409	540	832	549	20.6985	24.1166	24.7003	30.9401	40.118	32.8357
RLTA1_RS12170	0.595773	4.22808	0.000233516	0.00424585	371	333	386	228	294	290	23.8483	20.178	23.3113	13.0636	14.1763	17.3449
RLTA1_RS01915	0.520385	6.04123	0.000234157	0.00424645	1204	1223	1341	1039	1085	840	77.3945	74.1071	80.9857	59.531	52.3173	50.2405
RLTA1_RS01945	-0.590777	4.28173	0.000235251	0.00425523	228	249	273	355	563	369	14.6561	15.088	16.487	20.3402	27.1472	22.0699
RLTA1_RS08630	0.780826	8.48772	0.000238935	0.0043107	6424	7229	8447	5263	6090	3293	412.942	438.038	510.131	301.551	293.652	196.955
RLTA1_RS11030	0.639076	6.46383	0.000240866	0.00433434	1703	1698	1819	1374	1522	915	109.471	102.889	109.853	78.7253	73.3889	54.7262
RLTA1_RS09325	0.553687	4.53987	0.000242588	0.00434294	370	514	459	335	370	323	23.784	31.1456	27.7199	19.1943	17.8409	19.3187
RLTA1_RS23970	-0.59753	4.98746	0.000242426	0.00434294	355	407	462	550	838	705	22.8198	24.662	27.9011	31.5131	40.4073	42.1661
RLTA1_RS11500	-0.648459	8.51261	0.000245333	0.00438085	4896	4059	4843	7037	9195	8205	314.72	245.953	292.478	403.195	443.371	490.742
RLTA1_RS08110	0.669595	2.74332	0.000249055	0.00442903	129	139	126	77	102	100	8.29227	8.42263	7.60939	4.41183	4.91831	5.98101
RLTA1_RS25105	0.658505	5.8973	0.000249299	0.00442903	1156	1276	1109	1003	846	673	74.309	77.3186	66.9747	57.4683	40.7931	40.2522
RLTA1_RS24460	-0.565574	5.41983	0.000250488	0.00443884	534	513	626	934	908	929	34.3261	31.085	37.8054	53.5149	43.7826	55.5636
RLTA1_RS32085	0.916414	6.86622	0.00026071	0.00460829	2639	2337	2418	1611	2048	855	169.638	141.609	146.028	92.3046	98.752	51.1376
RLTA1_RS01005	-0.557732	5.57404	0.000261384	0.00460854	659	549	657	1060	1200	854	42.3613	33.2664	39.6775	60.7342	57.8625	51.0778
RLTA1_RS31325	0.485926	5.39889	0.000267292	0.00470084	711	855	825	587	705	629	45.7039	51.8083	49.8234	33.633	33.9942	37.6205
RLTA1_RS23120	0.653876	5.92883	0.000269341	0.00472497	1340	1084	1182	703	1157	764	86.1367	65.6844	71.3833	40.2794	55.7891	45.6949
RLTA1_RS17605	0.537431	5.24927	0.000270976	0.00474175	603	829	758	509	672	523	38.7615	50.2328	45.7771	29.1639	32.403	31.2807
RLTA1_RS06720	-0.571999	4.80266	0.000280636	0.00485216	364	332	389	493	700	629	23.3983	20.1174	23.4925	28.2472	33.7531	37.6205
RLTA1_RS09670	-0.773879	4.761	0.000279876	0.00485216	370	272	322	631	836	427	23.784	16.4817	19.4462	36.1541	40.3109	25.5389
RLTA1_RS10370	0.504656	5.78587	0.000279248	0.00485216	989	1163	990	779	911	804	63.574	70.4714	59.7881	44.6339	43.9273	48.0873
RLTA1_RS14570	0.536015	4.522	0.000280761	0.00485216	365	495	460	331	400	297	23.4626	29.9943	27.7803	18.9651	19.2875	17.7636
RLTA1_RS23020	0.874234	11.1336	0.000279935	0.00485216	49808	42649	48607	32208	23191	30001	3201.71	2584.29	2935.47	1845.4	1118.24	1794.36
RLTA1_RS09630	0.650782	9.26955	0.00029551	0.00509445	12805	11399	12387	8772	10829	6953	823.12	690.717	748.076	502.605	522.161	415.859
RLTA1_RS21195	-0.528602	3.38328	0.000302394	0.00520029	133	140	137	203	267	200	8.54939	8.48323	8.2737	11.6312	12.8744	11.962
RLTA1_RS30125	0.609002	6.43782	0.000305733	0.00524479	1458	1706	1933	1351	1446	980	93.7219	103.374	116.738	77.4075	69.7243	58.6139
RLTA1_RS04165	-0.928455	4.84895	0.000309025	0.00528826	331	309	319	475	645	912	21.2771	18.7237	19.265	27.2158	31.1011	54.5468
RLTA1_RS06520	0.600692	5.4261	0.000316006	0.0053945	728	1021	769	596	639	625	46.7967	61.867	46.4414	34.1487	30.8118	37.3813
RLTA1_RS01770	-0.532559	5.8114	0.000320794	0.00546289	672	696	861	1083	1381	1172	43.1969	42.1738	51.9975	62.0521	66.5901	70.0974
RLTA1_RS06500	-0.70363	5.9606	0.000323634	0.00549784	862	635	794	1253	1380	1550	55.4103	38.4775	47.9512	71.7925	66.5419	92.7056
RLTA1_RS17035	0.703955	5	0.000330849	0.00560677	471	812	648	474	476	380	30.2764	49.2027	39.134	27.1585	22.9521	22.7278
RLTA1_RS33900	0.573818	4.98494	0.000331742	0.00560828	554	644	640	482	425	470	35.6118	39.0229	38.6509	27.6169	20.493	28.1107
RLTA1_RS32410	0.502617	4.22033	0.000332936	0.00561487	305	379	375	274	325	245	19.6057	22.9653	22.647	15.6992	15.6711	14.6535
RLTA1_RS00870	0.518309	4.67796	0.000334379	0.00562562	525	495	437	360	428	362	33.7476	29.9943	26.3913	20.6267	20.6376	21.6512
RLTA1_RS01535	-0.731473	5.3411	0.000339643	0.00569349	576	497	397	762	967	1020	37.0259	30.1155	23.9756	43.6599	46.6275	61.0063
RLTA1_RS34010	-0.57529	3.45973	0.000340044	0.00569349	138	133	153	251	239	220	8.8708	8.05907	9.23998	14.3814	11.5243	13.1582
RLTA1_RS35915	-0.657603	2.56667	0.00034107	0.005697	76	66	76	136	137	115	4.88537	3.99924	4.58979	7.79232	6.60597	6.87816
RLTA1_RS09355	0.45303	5.46955	0.000341939	0.0056979	788	848	849	619	811	625	50.6535	51.3841	51.2728	35.4665	39.1054	37.3813
RLTA1_RS35785	-0.794818	9.11549	0.000344081	0.00571993	7279	4961	7419	13181	15614	10072	467.902	300.609	448.048	755.225	752.888	602.407
RLTA1_RS11725	-0.692992	7.87813	0.000355102	0.00587616	3150	2532	3034	6094	5548	4262	202.486	153.425	183.229	349.165	267.518	254.911
RLTA1_RS23950	-0.56075	4.77408	0.000355162	0.00587616	316	361	394	477	754	562	20.3128	21.8746	23.7944	27.3304	36.3569	33.6133
RLTA1_RS11060	-0.58397	4.7954	0.000356423	0.00588308	362	356	356	688	669	464	23.2698	21.5716	21.4995	39.42	32.2583	27.7519
RLTA1_RS33820	0.557983	3.94814	0.000358664	0.00590612	268	291	330	201	239	238	17.2273	17.633	19.9294	11.5166	11.5243	14.2348
RLTA1_RS04375	0.50235	4.11027	0.000362002	0.00593869	314	303	362	242	293	245	20.1843	18.3601	21.8619	13.8657	14.1281	14.6535
RLTA1_RS28020	0.523539	7.10678	0.000362344	0.00593869	2516	2754	2629	2119	2191	1873	161.731	166.877	158.771	121.411	105.647	112.024
RLTA1_RS00855	0.524153	4.15559	0.000370502	0.00605818	358	343	314	274	295	229	23.0126	20.7839	18.9631	15.6992	14.2245	13.6965
RLTA1_RS27960	0.761914	6.81566	0.000373552	0.00609378	2230	2199	2455	1578	2096	986	143.347	133.247	148.262	90.4138	101.066	58.9727
RLTA1_RS24455	-0.796801	6.56148	0.00038285	0.00621856	1092	1171	1085	2225	3099	1372	70.195	70.9562	65.5253	127.485	149.43	82.0594
RLTA1_RS30875	-0.756187	3.14706	0.000382982	0.00621856	101	135	79	173	235	194	6.49239	8.18026	4.77097	9.91229	11.3314	11.6032
RLTA1_RS30120	0.53566	6.30752	0.000390323	0.00632305	1432	1525	1597	1272	1331	948	92.0506	92.4066	96.446	72.8811	64.1792	56.6999
RLTA1_RS21440	-0.977081	8.55988	0.000392362	0.00632765	4728	3126	4456	10861	11235	5631	303.921	189.418	269.107	622.297	541.738	336.791
RLTA1_RS22515	-0.734177	7.34346	0.000392419	0.00632765	2064	1649	2201	4130	4402	2660	132.676	99.9203	132.923	236.634	212.259	159.095
RLTA1_RS23175	0.591271	6.03964	0.000400211	0.00643842	1288	1261	1287	733	1195	963	82.7941	76.4097	77.7245	41.9983	57.6214	57.5971
RLTA1_RS07745	-0.64763	7.43016	0.000422344	0.00677886	2557	1837	2106	3595	4378	3578	164.367	111.312	127.186	205.981	211.102	214
RLTA1_RS03790	0.538117	5.03828	0.000425165	0.00679944	545	748	597	433	564	471	35.0332	45.3247	36.054	24.8094	27.1954	28.1705
RLTA1_RS17195	-0.606005	3.66336	0.000425573	0.00679944	155	145	183	296	267	261	9.96358	8.7862	11.0517	16.9598	12.8744	15.6104
RLTA1_RS26390	0.487276	5.49959	0.000427382	0.00681275	910	821	826	689	777	599	58.4958	49.7481	49.8838	39.4773	37.466	35.8262
RLTA1_RS01385	-0.535236	4.82796	0.000432451	0.00686222	345	358	420	654	702	485	22.177	21.6928	25.3646	37.4719	33.8496	29.0079
RLTA1_RS27560	-0.97394	7.93136	0.000431862	0.00686222	2575	2358	3069	6851	7944	3247	165.524	142.882	185.343	392.538	383.05	194.203
RLTA1_RS11535	-0.512895	3.40558	0.000434406	0.00687761	134	143	142	208	246	220	8.61367	8.66501	8.57566	11.9177	11.8618	13.1582
RLTA1_RS35185	0.593241	4.61861	0.000442934	0.00699676	380	492	564	318	453	308	24.4268	29.8125	34.0611	18.2203	21.8431	18.4215
RLTA1_RS01825	-0.569592	5.80205	0.000456216	0.0071903	727	648	802	1143	1572	972	46.7324	39.2652	48.4344	65.4899	75.7999	58.1354
RLTA1_RS23065	-0.920805	1.95002	0.000458107	0.00720384	42	50	33	70	92	104	2.69981	3.02972	1.99294	4.01075	4.43612	6.22025
RLTA1_RS25835	0.581504	3.63774	0.000462325	0.00725382	226	224	270	177	176	186	14.5275	13.5732	16.3058	10.1415	8.4865	11.1247
RLTA1_RS20750	0.872324	10.3822	0.000464593	0.00727307	26919	25713	31293	22059	14381	14570	1730.38	1558.07	1889.85	1263.9	693.434	871.433
RLTA1_RS17235	0.43357	4.96224	0.000467915	0.00730868	563	597	576	442	571	442	36.1903	36.1749	34.7858	25.325	27.5329	26.4361
RLTA1_RS06860	0.550367	6.82652	0.000473775	0.00733458	1890	2466	2209	1740	1887	1428	121.491	149.426	133.406	99.6958	90.9888	85.4088
RLTA1_RS18550	-0.705295	4.88913	0.000473537	0.00733458	329	351	411	683	910	444	21.1485	21.2687	24.8211	39.1335	43.8791	26.5557
RLTA1_RS26900	0.58493	4.80485	0.000471751	0.00733458	459	599	571	451	467	309	29.505	36.2961	34.4838	25.8407	22.5182	18.4813
RLTA1_RS31170	-0.78936	6.61178	0.000470769	0.00733458	1090	1083	1309	2878	2344	1559	70.0664	65.6238	79.0531	164.899	113.025	93.2439
RLTA1_RS30180	-0.702222	5.62491	0.00047728	0.0073725	651	556	610	1226	1407	747	41.847	33.6905	36.8391	70.2455	67.8438	44.6781
RLTA1_RS11320	0.57491	5.45126	0.000478794	0.00737955	752	930	862	645	825	475	48.3394	56.3529	52.0579	36.9562	39.7805	28.4098
RLTA1_RS01885	-0.600495	5.21984	0.000489878	0.00752875	368	485	587	746	1000	723	23.6555	29.3883	35.4501	42.7432	48.2187	43.2427
RLTA1_RS19655	-0.536026	7.65908	0.00049063	0.00752875	2712	2442	2854	4061	4950	4111	174.33	147.972	172.359	232.681	238.683	245.879
RLTA1_RS22705	-0.552386	3.24286	0.000492061	0.00753414	117	126	125	179	257	177	7.52089	7.63491	7.549	10.2561	12.3922	10.5864
RLTA1_RS03005	0.601277	3.33771	0.000496689	0.00758837	181	206	200	136	139	158	11.6349	12.4825	12.0784	7.79232	6.70241	9.44999
RLTA1_RS08720	0.433002	5.19831	0.000505549	0.00770687	631	709	707	526	666	522	40.5614	42.9615	42.6971	30.1379	32.1137	31.2209
RLTA1_RS28570	0.507364	6.32114	0.000509417	0.00774892	1481	1681	1395	1140	1440	1055	95.2004	101.859	84.2468	65.318	69.435	63.0996
RLTA1_RS24605	-0.577888	4.75279	0.000519115	0.00787926	356	358	331	661	662	444	22.8841	21.6928	19.9897	37.873	31.9208	26.5557
RLTA1_RS23930	0.494194	5.66675	0.000524859	0.00794917	834	963	1092	742	910	667	53.6105	58.3525	65.9481	42.514	43.8791	39.8933
RLTA1_RS21765	-0.547501	4.8959	0.000540996	0.00817082	349	386	437	517	748	667	22.4341	23.3895	26.3913	29.6223	36.0676	39.8933
RLTA1_RS34125	-0.535909	3.23766	0.000541835	0.00817082	119	135	115	193	239	174	7.64946	8.18026	6.94508	11.0582	11.5243	10.407
RLTA1_RS02415	-0.753167	3.06466	0.000548537	0.00825407	89	116	93	140	210	215	5.72102	7.02896	5.61646	8.0215	10.1259	12.8592
RLTA1_RS10275	0.565901	7.30605	0.000549746	0.00825446	2656	3444	3095	2427	2366	2165	170.731	208.687	186.913	139.059	114.086	129.489
RLTA1_RS14205	0.551763	4.49735	0.000565087	0.00846661	393	459	449	322	315	354	25.2625	27.8129	27.116	18.4495	15.1889	21.1728
RLTA1_RS25475	-0.544599	6.883	0.000566986	0.00847686	1470	1513	1681	2115	3076	2510	94.4933	91.6795	101.519	121.182	148.321	150.123
RLTA1_RS04650	-0.677205	2.4121	0.000577261	0.00861204	62	71	61	105	152	96	3.98543	4.30221	3.68391	6.01613	7.32925	5.74177
RLTA1_RS02365	-0.474002	5.24922	0.000581539	0.00865737	502	497	543	699	902	814	32.2691	30.1155	32.7929	40.0502	43.4933	48.6854
RLTA1_RS20295	-0.505512	5.22981	0.000588566	0.00874334	493	438	571	719	941	753	31.6906	26.5404	34.4838	41.1962	45.3738	45.037
RLTA1_RS16795	0.525415	6.68916	0.000599979	0.00885635	1838	2000	2081	1531	1908	1234	118.149	121.189	125.676	87.7209	92.0014	73.8056
RLTA1_RS22730	-0.939652	9.13176	0.000598365	0.00885635	7307	4747	6553	15491	17001	8432	469.702	287.642	395.749	887.579	819.767	504.319
RLTA1_RS33035	0.46578	6.10841	0.000599497	0.00885635	1296	1293	1294	1029	1257	903	83.3084	78.3487	78.1472	58.9581	60.611	54.0085
RLTA1_RS21400	-0.684763	7.36883	0.000602758	0.0088786	2116	1784	2250	3871	4781	2649	136.019	108.101	135.882	221.795	230.534	158.437
RLTA1_RS29235	0.558207	4.15758	0.000606365	0.00891292	291	378	361	291	274	221	18.7058	22.9047	21.8015	16.6733	13.2119	13.218
RLTA1_RS05600	-0.661028	3.24926	0.000611145	0.00896432	110	132	111	192	287	159	7.07093	7.99847	6.70351	11.0009	13.8388	9.5098
RLTA1_RS15245	0.552843	8.05503	0.000614604	0.00899615	5052	5495	4816	4148	4082	3547	324.748	332.967	290.848	237.666	196.829	212.146
RLTA1_RS33560	-0.902594	2.63445	0.000627276	0.00914583	67	79	59	106	222	114	4.30684	4.78697	3.56313	6.07342	10.7046	6.81835
RLTA1_RS34050	-1.13456	8.09057	0.000627449	0.00914583	3330	2269	2648	7293	10416	3390	214.056	137.489	159.918	417.863	502.246	202.756
RLTA1_RS19385	0.578452	7.34566	0.000639192	0.00929758	3305	2838	3308	2558	2672	1936	212.449	171.967	199.777	146.564	128.84	115.792
RLTA1_RS18030	-0.700764	5.51857	0.00065367	0.00948841	567	469	655	756	1400	984	36.4474	28.4188	39.5568	43.3161	67.5062	58.8531
RLTA1_RS31320	0.719292	5.1921	0.000661558	0.00958299	495	817	907	513	590	415	31.8192	49.5057	54.7755	29.3931	28.4491	24.8212
RLTA1_RS13850	0.61457	2.78048	0.0006728	0.00972564	138	144	116	100	103	90	8.8708	8.72561	7.00547	5.72965	4.96653	5.38291
RLTA1_RS15285	-0.512629	4.19216	0.000686654	0.00990542	227	264	236	356	402	406	14.5918	15.9969	14.2525	20.3975	19.3839	24.2829
RLTA1_RS25610	0.524455	4.53125	0.000694133	0.00999265	412	474	435	336	331	360	26.4838	28.7218	26.2705	19.2516	15.9604	21.5316
RLTA1_RS17450	0.655913	6.86846	0.000695664	0.00999409	2445	2111	2376	1975	1630	1342	157.167	127.915	143.491	113.161	78.5966	80.2651
RLTA1_RS07740	-0.57732	9.13308	0.000704532	0.0101007	7717	6814	7328	11226	13407	12153	496.058	412.891	442.553	643.21	646.469	726.872
RLTA1_RS06525	0.548291	5.50481	0.000717418	0.0102644	708	1023	893	636	699	674	45.511	61.9882	53.9301	36.4405	33.7049	40.312
RLTA1_RS13940	0.590945	3.73975	0.00072626	0.0103662	255	302	218	189	236	159	16.3917	18.2995	13.1655	10.829	11.3796	9.5098
RLTA1_RS28375	0.549739	8.3663	0.000727504	0.0103662	6136	6375	6546	5012	5849	3915	394.429	386.29	395.326	287.17	282.031	234.156
RLTA1_RS12100	-0.76691	2.24333	0.000736881	0.0104571	62	48	55	117	124	78	3.98543	2.90854	3.32156	6.70369	5.97912	4.66519
RLTA1_RS25395	0.46416	5.05107	0.000736084	0.0104571	576	645	644	520	605	407	37.0259	39.0834	38.8924	29.7942	29.1723	24.3427
RLTA1_RS23825	-0.491641	6.46184	0.000746933	0.0105783	1173	1099	1283	1826	2236	1607	75.4018	66.5934	77.4829	104.623	107.817	96.1148
RLTA1_RS26290	-0.517461	4.77313	0.000752952	0.0106419	348	364	376	464	701	597	22.3698	22.0564	22.7074	26.5856	33.8013	35.7066
RLTA1_RS34790	0.480351	5.64661	0.000756634	0.0106724	870	991	973	646	869	775	55.9246	60.0491	58.7614	37.0135	41.9021	46.3528
RLTA1_RS25340	0.762863	8.46518	0.000758327	0.0106747	6426	6493	8732	4685	6654	3289	413.071	393.44	527.343	268.434	320.848	196.715
RLTA1_RS11790	0.44715	4.67488	0.000772717	0.0108553	479	483	464	407	426	347	30.7907	29.2671	28.0219	23.3197	20.5412	20.7541
RLTA1_RS24450	-0.671502	6.11313	0.00078585	0.0110177	937	785	862	1693	1951	1061	60.2314	47.5667	52.0579	97.0029	94.0748	63.4585
RLTA1_RS14485	-0.56066	3.96267	0.000789949	0.0110529	179	210	219	314	445	263	11.5063	12.7248	13.2258	17.9911	21.4573	15.73
RLTA1_RS10045	1.01896	6.82258	0.000802399	0.0112002	2856	1870	2609	1622	1812	734	183.587	113.312	157.563	92.9349	87.3724	43.9006
RLTA1_RS28135	0.600027	5.48846	0.000803678	0.0112002	813	823	991	690	823	461	52.2606	49.8693	59.8485	39.5346	39.684	27.5724
RLTA1_RS10925	0.496252	5.75415	0.000810793	0.0112768	931	1126	1011	799	816	820	59.8457	68.2294	61.0563	45.7799	39.3465	49.0443
RLTA1_RS02090	0.524628	8.1121	0.000815079	0.0113139	4690	5514	5686	4143	4344	3908	301.479	334.118	343.389	237.379	209.462	233.738
RLTA1_RS22185	-0.795169	2.03042	0.000818241	0.0113352	50	57	33	86	111	79	3.21406	3.45389	1.99294	4.9275	5.35228	4.725
RLTA1_RS18650	0.787445	6.10316	0.000836317	0.0115627	1366	1295	1566	1206	942	612	87.808	78.4699	94.5739	69.0995	45.4221	36.6038
RLTA1_RS33885	0.625367	7.70652	0.000858847	0.0118507	3528	5027	3786	2507	3759	2805	226.784	304.609	228.644	143.642	181.254	167.767
RLTA1_RS33750	-0.407702	5.07189	0.000865377	0.0119173	449	467	484	676	774	645	28.8622	28.2976	29.2297	38.7324	37.3213	38.5775
RLTA1_RS20425	0.601788	7.60141	0.00086922	0.0119466	4094	3516	3740	3186	2921	2328	263.167	213.05	225.866	182.547	140.847	139.238
RLTA1_RS17075	-0.563088	3.14745	0.000873005	0.0119751	119	97	126	191	211	169	7.64946	5.87767	7.60939	10.9436	10.1742	10.1079
RLTA1_RS17230	0.428631	5.63592	0.000893618	0.0122338	903	892	973	720	908	700	58.0459	54.0503	58.7614	41.2535	43.7826	41.8671
RLTA1_RS02015	-0.510348	4.72591	0.000904463	0.0123492	321	349	387	512	744	460	20.6342	21.1475	23.3717	29.3358	35.8747	27.5126
RLTA1_RS16370	-0.444184	4.70346	0.000905583	0.0123492	358	362	347	528	660	460	23.0126	21.9352	20.956	30.2525	31.8244	27.5126
RLTA1_RS04050	0.632134	5.7388	0.000911161	0.0123687	807	1231	1125	763	978	577	51.8749	74.5918	67.941	43.7172	47.1579	34.5104
RLTA1_RS10280	0.563067	6.68619	0.000912329	0.0123687	1554	2188	2246	1385	1790	1396	99.8929	132.581	135.64	79.3556	86.3116	83.4949
RLTA1_RS23900	-0.740523	7.1772	0.000909871	0.0123687	2036	1317	1890	3742	3546	2630	130.876	79.803	114.141	214.403	170.984	157.3
RLTA1_RS13875	0.524952	6.10873	0.00093093	0.0125964	1432	1139	1373	1042	1175	889	92.0506	69.0171	82.9182	59.7029	56.657	53.1712
RLTA1_RS16580	0.540323	6.81974	0.000941119	0.0127097	1808	2389	2323	1504	1820	1706	116.22	144.76	140.291	86.1739	87.7581	102.036
RLTA1_RS33785	0.4542	5.12065	0.000951944	0.012831	662	689	597	539	615	456	42.5541	41.7496	36.054	30.8828	29.6545	27.2734
RLTA1_RS01585	-0.632318	3.36474	0.000960934	0.0128807	132	134	121	232	201	237	8.48511	8.11966	7.30743	13.2928	9.69197	14.175
RLTA1_RS06370	-0.716893	7.68596	0.000958099	0.0128807	2820	2081	2644	3604	5121	5254	181.273	126.097	159.676	206.496	246.928	314.242
RLTA1_RS30770	0.88444	3.1051	0.000961163	0.0128807	223	125	187	123	97	105	14.3347	7.57431	11.2933	7.04746	4.67722	6.28006
RLTA1_RS19720	-0.74597	7.463	0.000967243	0.0129373	2543	1708	2122	4517	4741	2929	163.467	103.495	128.152	258.808	228.605	175.184
RLTA1_RS02625	-0.482926	3.34169	0.000971681	0.0129719	123	136	147	202	245	194	7.90658	8.24085	8.87762	11.5739	11.8136	11.6032
RLTA1_RS15490	-0.529054	4.8053	0.000986311	0.013142	324	362	423	515	639	641	20.8271	21.9352	25.5458	29.5077	30.8118	38.3383
RLTA1_RS14575	0.429151	5.57056	0.000996744	0.0132557	881	923	840	725	814	677	56.6317	55.9287	50.7293	41.5399	39.2501	40.4914
RLTA1_RS16070	0.487489	4.98891	0.00100775	0.0133766	579	622	596	497	593	367	37.2188	37.6898	35.9936	28.4763	28.5937	21.9503
RLTA1_RS24925	0.472002	5.43209	0.00101124	0.0133858	778	916	740	588	797	604	50.0107	55.5046	44.6901	33.6903	38.4303	36.1253
RLTA1_RS25930	-0.858917	6.64978	0.00101228	0.0133858	1351	884	1215	2653	3063	1471	86.8438	53.5655	73.3763	152.008	147.694	87.9806
RLTA1_RS27215	0.731644	3.64904	0.00101471	0.0133927	204	310	244	120	209	186	13.1134	18.7843	14.7356	6.87558	10.0777	11.1247
RLTA1_RS20895	0.498402	5.31935	0.00102344	0.0134824	778	706	781	663	660	489	50.0107	42.7797	47.1661	37.9876	31.8244	29.2471
RLTA1_RS27470	0.667203	6.3213	0.00102979	0.0135405	1342	2074	1360	1120	1395	898	86.2653	125.673	82.1331	64.172	67.2652	53.7094
RLTA1_RS04170	0.526246	6.72768	0.00104596	0.0136531	1859	2206	2017	1631	1925	1238	119.499	133.671	121.811	93.4505	92.8211	74.0449
RLTA1_RS08435	-0.464772	6.02038	0.0010473	0.0136531	917	859	866	1258	1490	1362	58.9458	52.0507	52.2995	72.0789	71.8459	81.4613
RLTA1_RS11715	0.539203	5.56036	0.00104771	0.0136531	957	914	836	664	676	746	61.517	55.3834	50.4877	38.0448	32.5959	44.6183
RLTA1_RS18560	-0.529894	4.71568	0.00104641	0.0136531	334	300	406	486	635	572	21.4699	18.1783	24.5191	27.8461	30.6189	34.2114
RLTA1_RS25900	-0.572274	2.83552	0.00104813	0.0136531	84	86	104	146	188	128	5.39962	5.21113	6.28077	8.36528	9.06512	7.65569
RLTA1_RS10230	-0.586913	3.23753	0.0010537	0.0137001	122	115	124	173	275	171	7.8423	6.96837	7.48861	9.91229	13.2602	10.2275
RLTA1_RS32190	0.47511	6.5668	0.00106437	0.013813	1603	1986	1773	1392	1574	1373	103.043	120.341	107.075	79.7567	75.8963	82.1192
RLTA1_RS23850	0.440091	4.86325	0.00108004	0.0139905	464	588	575	421	519	413	29.8264	35.6296	34.7254	24.1218	25.0255	24.7016
RLTA1_RS06135	-0.555288	4.8504	0.00109276	0.0141034	389	343	397	620	813	463	25.0054	20.7839	23.9756	35.5238	39.2018	27.6921
RLTA1_RS24465	0.535278	5.34309	0.0010928	0.0141034	708	781	843	623	550	620	45.511	47.3243	50.9105	35.6957	26.5203	37.0822
RLTA1_RS35920	-0.642836	3.1631	0.00109523	0.0141087	101	108	126	163	200	223	6.49239	6.54421	7.60939	9.33932	9.64375	13.3376
RLTA1_RS07750	-0.527645	7.95179	0.00109942	0.0141366	3093	3182	3584	4526	6641	4966	198.822	192.812	216.445	259.324	320.221	297.017
RLTA1_RS26855	0.552919	3.5943	0.00110843	0.0142262	205	269	220	173	224	140	13.1776	16.2999	13.2862	9.91229	10.801	8.37341
RLTA1_RS20110	-0.62123	7.68545	0.0011171	0.0143112	2823	2165	2875	4941	5096	3664	181.466	131.187	173.627	283.102	245.723	219.144
RLTA1_RS01710	-0.452867	4.11848	0.00112216	0.0143497	218	226	264	337	428	331	14.0133	13.6944	15.9435	19.3089	20.6376	19.7971
RLTA1_RS07725	-0.59875	7.22198	0.0011272	0.0143878	2146	1588	2016	2926	4129	2879	137.947	96.2241	121.75	167.649	199.095	172.193
RLTA1_RS26215	0.469525	5.99731	0.00113123	0.0144129	1025	1323	1261	968	1126	848	65.8882	80.1665	76.1543	55.463	54.2943	50.7189
RLTA1_RS34235	0.605926	4.90512	0.00114305	0.014537	459	686	614	358	588	370	29.505	41.5678	37.0807	20.5121	28.3526	22.1297
RLTA1_RS19890	0.461655	7.14359	0.00116189	0.0147497	2460	2749	2756	2118	2472	1941	158.132	166.574	166.44	121.354	119.197	116.091
RLTA1_RS16240	-0.427921	5.06891	0.00116511	0.0147637	423	458	506	684	741	672	27.1909	27.7523	30.5583	39.1908	35.7301	40.1924
RLTA1_RS00375	0.551961	4.66306	0.00116806	0.0147743	479	467	513	363	503	272	30.7907	28.2976	30.9811	20.7986	24.254	16.2683
RLTA1_RS22925	-0.602351	3.23791	0.00117246	0.0148031	111	130	118	182	200	228	7.13521	7.87728	7.12626	10.428	9.64375	13.6367
RLTA1_RS30270	0.715544	5.49346	0.00118732	0.0149636	686	1157	885	636	816	439	44.0969	70.1078	53.4469	36.4405	39.3465	26.2566
RLTA1_RS11975	-0.442544	5.14942	0.00119999	0.0150689	512	455	488	670	893	681	32.9119	27.5705	29.4713	38.3886	43.0593	40.7307
RLTA1_RS28330	-0.625149	5.77425	0.00119814	0.0150689	576	817	700	939	1335	1347	37.0259	49.5057	42.2744	53.8014	64.372	80.5642
RLTA1_RS21590	-0.716103	8.13791	0.00120449	0.0150983	3992	2746	3580	7446	6355	5300	256.61	166.392	216.203	426.629	306.43	316.993
RLTA1_RS19245	-0.581581	4.37405	0.00122903	0.0153783	205	280	320	411	578	378	13.1776	16.9665	19.3254	23.5488	27.8704	22.6082
RLTA1_RS04810	0.534152	6.83445	0.00123382	0.0154106	2078	2260	2222	1909	1858	1346	133.576	136.944	134.191	109.379	89.5904	80.5044
RLTA1_RS12025	-0.929778	3.30279	0.0012372	0.0154252	95	115	115	202	381	136	6.10671	6.96837	6.94508	11.5739	18.3713	8.13417
RLTA1_RS01840	-0.51933	5.33931	0.00125231	0.0155857	522	543	547	679	1148	807	33.5548	32.9028	33.0344	38.9043	55.3551	48.2667
RLTA1_RS14940	-0.75399	7.14226	0.00125537	0.0155961	1975	1433	1679	3926	3572	2246	126.955	86.8319	101.398	224.946	172.237	134.333
RLTA1_RS15600	-0.445052	5.09893	0.00125996	0.0156253	439	503	464	638	780	735	28.2194	30.479	28.0219	36.5551	37.6106	43.9604
RLTA1_RS28365	0.499142	7.86708	0.00126292	0.0156343	4300	4738	4248	3665	3907	3040	276.409	287.097	256.545	209.992	188.391	181.823
RLTA1_RS17015	-1.22314	5.66884	0.00126929	0.0156853	544	422	507	1248	2261	539	34.9689	25.5709	30.6187	71.506	109.023	32.2376
RLTA1_RS28775	-0.536323	3.44266	0.0012729	0.0157021	139	128	159	194	282	224	8.93508	7.7561	9.60233	11.1155	13.5977	13.3975
RLTA1_RS02965	-0.553914	4.75955	0.0012983	0.0159872	315	363	385	493	593	659	20.2486	21.9958	23.2509	28.2472	28.5937	39.4148
RLTA1_RS23260	0.515916	7.20861	0.00130997	0.0161025	3064	2764	2608	2277	2412	1977	196.957	167.483	157.502	130.464	116.304	118.245
RLTA1_RS15240	0.552474	8.96965	0.00132409	0.0162475	10304	9179	9433	7539	7629	7014	662.353	556.197	569.678	431.958	367.861	419.508
RLTA1_RS29155	0.484046	4.13363	0.00133788	0.0163879	293	342	356	289	287	222	18.8344	20.7233	21.4995	16.5587	13.8388	13.2778
RLTA1_RS04360	-0.615452	5.0718	0.00135802	0.0165764	324	489	478	641	1009	604	20.8271	29.6307	28.8674	36.727	48.6527	36.1253
RLTA1_RS21810	0.602654	7.21151	0.00135777	0.0165764	2303	2995	3416	2114	2086	2194	148.039	181.481	206.299	121.125	100.584	131.223
RLTA1_RS22035	-0.508863	3.48484	0.00136174	0.0165928	135	167	142	212	257	242	8.67795	10.1193	8.57566	12.1468	12.3922	14.474
RLTA1_RS07415	0.533853	5.53747	0.001386	0.016859	1017	836	803	730	713	626	65.3739	50.657	48.4948	41.8264	34.38	37.4411
RLTA1_RS16425	-0.542855	3.4482	0.00139354	0.0169212	128	136	163	248	272	184	8.22799	8.24085	9.84389	14.2095	13.1155	11.0051
RLTA1_RS21415	-0.741439	8.15523	0.00142382	0.0172589	3749	2855	3740	7462	7944	4332	240.99	172.997	225.866	427.546	383.05	259.097
RLTA1_RS02635	-0.644457	2.13943	0.00144192	0.0174479	50	59	53	80	109	97	3.21406	3.57508	3.20078	4.58372	5.25584	5.80158
RLTA1_RS10025	0.98766	8.01807	0.0014789	0.0178645	6141	4270	6295	3657	4401	1663	394.75	258.738	380.168	209.533	212.211	99.4642
RLTA1_RS01900	-0.491834	6.72764	0.00148798	0.0179256	1343	1369	1567	1944	2832	2059	86.3296	82.9539	94.6343	111.384	136.555	123.149
RLTA1_RS12230	0.499294	5.46337	0.00149021	0.0179256	725	863	924	723	764	521	46.6038	52.293	55.8022	41.4253	36.8391	31.161
RLTA1_RS23035	-0.506719	6.06635	0.00149166	0.0179256	850	784	1053	1335	1542	1416	54.639	47.5061	63.5928	76.4908	74.3533	84.6911
RLTA1_RS17985	-0.625827	4.06819	0.0014947	0.0179312	221	200	214	429	428	256	14.2061	12.1189	12.9239	24.5802	20.6376	15.3114
RLTA1_RS00130	-0.504269	6.19641	0.00151152	0.018071	1012	862	1065	1419	1672	1600	65.0525	52.2325	64.3175	81.3037	80.6217	95.6961
RLTA1_RS25485	-0.568974	3.80847	0.00150933	0.018071	158	177	209	245	405	269	10.1564	10.7252	12.6219	14.0376	19.5286	16.0889
RLTA1_RS19165	-0.677662	8.13693	0.00153254	0.018291	3770	2899	3831	6988	7650	4504	242.34	175.663	231.362	400.388	368.873	269.385
RLTA1_RS30175	-0.649666	4.93909	0.00155916	0.0185769	398	380	376	786	837	442	25.5839	23.0259	22.7074	45.035	40.3591	26.4361
RLTA1_RS22725	-0.507372	5.3318	0.00156378	0.0186002	527	507	577	833	814	911	33.8762	30.7214	34.8462	47.728	39.2501	54.487
RLTA1_RS13175	0.497099	6.00942	0.00157065	0.0186338	1284	1238	1132	1061	1065	801	82.537	75.016	68.3637	60.7915	51.353	47.9079
RLTA1_RS36140	0.88949	8.15636	0.00157194	0.0186338	7728	4299	5865	2640	5247	3271	496.765	260.496	354.199	151.263	253.004	195.639
RLTA1_RS06955	0.411802	4.45944	0.00157586	0.0186486	367	436	414	328	395	310	23.5912	26.4192	25.0023	18.7932	19.0464	18.5411
RLTA1_RS32155	0.738449	10.8375	0.00157888	0.0186527	33576	39245	38544	26694	33556	16162	2158.3	2378.03	2327.75	1529.47	1618.03	966.65
RLTA1_RS15765	-0.47282	6.5179	0.00159027	0.0187268	1248	1168	1307	2034	2180	1629	80.2229	70.7744	78.9323	116.541	105.117	97.4306
RLTA1_RS16085	-0.577259	5.82997	0.00159052	0.0187268	658	776	783	1297	1608	868	42.297	47.0213	47.2869	74.3135	77.5357	51.9151
RLTA1_RS29435	0.448294	5.71255	0.00161494	0.0189823	1003	1005	925	719	891	814	64.474	60.8975	55.8626	41.1962	42.9629	48.6854
RLTA1_RS01175	-0.702023	7.45058	0.0016462	0.0193172	2423	1878	2147	3992	5410	2671	155.753	113.796	129.662	228.727	260.863	159.753
RLTA1_RS13710	0.42181	4.47358	0.00168203	0.0195852	396	436	399	329	367	338	25.4553	26.4192	24.0964	18.8505	17.6963	20.2158
RLTA1_RS15780	0.627946	6.70198	0.00168587	0.0195852	2161	1968	2000	1614	1259	1540	138.912	119.25	120.784	92.4765	60.7074	92.1075
RLTA1_RS17250	-0.6358	9.08212	0.00167548	0.0195852	6870	5956	7791	12833	14708	8920	441.611	360.901	470.514	735.285	709.201	533.506
RLTA1_RS18230	-0.689217	3.62304	0.00168483	0.0195852	148	153	152	325	330	176	9.51361	9.27096	9.17958	18.6213	15.9122	10.5266
RLTA1_RS30860	0.666045	3.54476	0.0016826	0.0195852	273	182	233	169	155	163	17.5488	11.0282	14.0713	9.6831	7.47391	9.74904
RLTA1_RS33735	-0.452844	5.31868	0.00168015	0.0195852	498	528	608	782	869	857	32.012	31.9939	36.7183	44.8058	41.9021	51.2572
RLTA1_RS04340	-0.525454	3.99853	0.00169576	0.0196674	232	199	199	320	343	356	14.9132	12.0583	12.018	18.3349	16.539	21.2924
RLTA1_RS22610	-0.842793	10.4881	0.00169965	0.0196798	19035	12161	18611	36230	43753	22511	1223.59	736.89	1123.96	2075.85	2109.71	1346.38
RLTA1_RS07830	-0.508733	8.06836	0.00171249	0.019763	3492	3438	3835	5194	7372	4885	224.47	208.324	231.603	297.598	355.469	292.172
RLTA1_RS11730	-0.569398	5.36937	0.00171153	0.019763	509	567	537	979	1130	619	32.7191	34.3571	32.4305	56.0932	54.4872	37.0224
RLTA1_RS06095	0.516419	7.24873	0.00176358	0.0202521	2585	2969	3157	2268	2864	1791	166.167	179.905	190.658	129.948	138.098	107.12
RLTA1_RS06235	-0.615558	5.04023	0.00176227	0.0202521	403	388	467	664	1039	513	25.9053	23.5107	28.2031	38.0448	50.0993	30.6826
RLTA1_RS10445	0.456913	5.27115	0.00176297	0.0202521	668	828	672	618	629	530	42.9398	50.1722	40.5834	35.4092	30.3296	31.6993
RLTA1_RS08230	0.463369	7.54721	0.00176877	0.0202784	3519	3546	3462	2901	3242	2491	226.205	214.868	209.077	166.217	156.325	148.987
RLTA1_RS15910	-0.463784	6.07447	0.00177708	0.0203403	993	830	919	1388	1550	1332	63.8312	50.2934	55.5002	79.5275	74.7391	79.667
RLTA1_RS18225	-0.600769	3.55045	0.00179354	0.0204616	130	134	184	235	337	202	8.35655	8.11966	11.1121	13.4647	16.2497	12.0816
RLTA1_RS20475	0.42366	4.19874	0.0017914	0.0204616	322	344	352	279	343	238	20.6985	20.8445	21.258	15.9857	16.539	14.2348
RLTA1_RS09985	-0.667754	5.93538	0.0018125	0.0206442	828	696	764	1303	1148	1587	53.2248	42.1738	46.1395	74.6573	55.3551	94.9186
RLTA1_RS05605	-0.590357	4.0529	0.00182439	0.0207457	195	265	179	299	459	335	12.5348	16.0575	10.8102	17.1316	22.1324	20.0364
RLTA1_RS01355	-0.471183	4.03271	0.00182739	0.0207461	221	213	227	368	391	278	14.2061	12.9066	13.709	21.0851	18.8535	16.6272
RLTA1_RS30660	0.491634	4.72262	0.00183866	0.0208401	528	505	459	442	431	326	33.9404	30.6002	27.7199	25.325	20.7823	19.4981
RLTA1_RS29765	0.597181	5.4468	0.00185633	0.0209385	990	658	890	669	665	561	63.6383	39.8712	53.7489	38.3313	32.0655	33.5535
RLTA1_RS32665	-0.7397	8.28021	0.00185108	0.0209385	4414	3204	3650	7568	9345	4711	283.737	194.145	220.431	433.62	450.604	281.765
RLTA1_RS36625	-0.633659	4.56809	0.00185629	0.0209385	277	290	332	511	738	352	17.8059	17.5724	20.0501	29.2785	35.5854	21.0531
RLTA1_RS20415	-0.633088	5.93366	0.00187378	0.0211011	886	658	772	1502	1627	968	56.9531	39.8712	46.6226	86.0593	78.4519	57.8962
RLTA1_RS25345	0.768973	8.00817	0.00188029	0.0211404	4790	4551	6449	3539	4904	2203	307.907	275.766	389.468	202.772	236.465	131.762
RLTA1_RS11900	-0.545388	5.83182	0.00189473	0.0212685	677	725	847	1349	1474	901	43.5183	43.931	51.152	77.2929	71.0744	53.8889
RLTA1_RS18390	0.514873	7.32815	0.00190906	0.0213949	2844	3148	3201	2404	3065	1858	182.816	190.751	193.315	137.741	147.79	111.127
RLTA1_RS23125	0.518843	7.25742	0.00191316	0.0214066	3173	2825	2736	1936	2785	2205	203.964	171.179	165.232	110.926	134.289	131.881
RLTA1_RS10465	0.382716	5.38682	0.00192868	0.0215434	737	782	778	643	762	587	47.3752	47.3849	46.985	36.8416	36.7427	35.1085
RLTA1_RS23820	-0.42314	5.59458	0.00193156	0.0215434	673	627	700	973	1212	859	43.2612	37.9927	42.2744	55.7495	58.4411	51.3769
RLTA1_RS32780	-0.47691	7.4419	0.00193582	0.0215564	2177	2220	2672	3543	4060	3475	139.94	134.52	161.367	203.001	195.768	207.84
RLTA1_RS06180	-0.488414	4.42498	0.00195495	0.0217348	270	267	327	402	480	479	17.3559	16.1787	19.7482	23.0332	23.145	28.649
RLTA1_RS28575	0.449706	7.29409	0.0019675	0.0218396	2715	2963	3133	2351	2626	2282	174.523	179.541	189.208	134.704	126.622	136.487
RLTA1_RS00865	0.57008	4.76153	0.00197339	0.0218396	406	581	589	382	379	421	26.0981	35.2054	35.5709	21.8872	18.2749	25.18
RLTA1_RS01860	-0.700125	3.76334	0.00197688	0.0218396	131	165	203	241	445	243	8.42083	9.99809	12.2596	13.8084	21.4573	14.5338
RLTA1_RS10115	1.13676	5.9432	0.0019757	0.0218396	1183	1422	1511	1016	823	290	76.0446	86.1654	91.2523	58.2132	39.684	17.3449
RLTA1_RS02620	-0.464188	5.23026	0.00199308	0.0219837	530	496	500	652	920	809	34.069	30.0549	30.196	37.3573	44.3612	48.3863
RLTA1_RS23150	0.575294	7.59153	0.00203893	0.0224539	4107	3625	3453	2346	3033	3075	264.003	219.655	208.534	134.417	146.247	183.916
RLTA1_RS25720	0.520171	5.19919	0.00206604	0.0227167	617	864	621	527	573	544	39.6615	52.3536	37.5034	30.1952	27.6293	32.5367
RLTA1_RS22635	0.573671	9.18684	0.00207229	0.0227496	9914	11586	12449	9011	10356	6510	637.283	702.048	751.82	516.298	499.353	389.364
RLTA1_RS20530	-0.795426	7.25675	0.00210124	0.0230312	2087	1292	2031	4135	4147	2419	134.155	78.2881	122.656	236.921	199.963	144.681
RLTA1_RS18090	-0.482214	6.41071	0.00211341	0.023092	1187	1052	1202	1907	2070	1470	76.3017	63.7454	72.5912	109.264	99.8128	87.9208
RLTA1_RS30285	0.491787	7.3261	0.002111	0.023092	2751	3528	2843	2392	2627	2277	176.837	213.777	171.694	137.053	126.671	136.188
RLTA1_RS01390	-0.43315	5.01098	0.00212462	0.0231782	399	427	504	593	770	662	25.6482	25.8738	30.4376	33.9768	37.1284	39.5943
RLTA1_RS17175	0.499634	6.46061	0.00212975	0.023198	1390	1731	1903	1399	1502	1105	89.3508	104.889	114.926	80.1577	72.4246	66.0901
RLTA1_RS19550	-0.648496	9.49618	0.002139	0.0232625	9687	7746	9856	18602	15431	13961	622.691	469.365	595.223	1065.83	744.063	835.008
RLTA1_RS01215	0.44789	5.32616	0.00215509	0.0233647	769	809	664	603	649	598	49.4322	49.0209	40.1003	34.5498	31.294	35.7664
RLTA1_RS12355	-0.886161	5.79698	0.00215319	0.0233647	661	549	679	1509	1843	676	42.4898	33.2664	41.0062	86.4604	88.8672	40.4316
RLTA1_RS05905	0.459962	6.98799	0.00217376	0.0235114	2385	2293	2458	2020	2207	1642	153.311	138.943	148.444	115.739	106.419	98.2081
RLTA1_RS33550	-1.18412	2.96856	0.00217536	0.0235114	88	69	71	147	124	297	5.65674	4.18102	4.28783	8.42258	5.97912	17.7636
RLTA1_RS11765	-0.43259	4.43872	0.0021917	0.0236514	286	325	281	413	560	394	18.3844	19.6932	16.9702	23.6634	27.0025	23.5652
RLTA1_RS19185	-0.435073	5.62277	0.00219586	0.0236597	707	679	642	965	1089	1032	45.4468	41.1437	38.7717	55.2911	52.5102	61.724
RLTA1_RS02780	0.524196	6.35201	0.0022033	0.0236668	1439	1426	1819	1343	1360	974	92.5006	86.4078	109.853	76.9491	65.5775	58.255
RLTA1_RS23110	0.583132	2.91442	0.00220271	0.0236668	140	164	130	87	126	114	8.99936	9.9375	7.85096	4.98479	6.07556	6.81835
RLTA1_RS02885	0.589835	6.25013	0.00221038	0.0237064	1565	1709	1158	1116	1353	884	100.6	103.556	69.9339	63.9428	65.24	52.8721
RLTA1_RS24100	-0.486348	6.75191	0.00222578	0.0238349	1372	1411	1578	1943	2550	2384	88.1937	85.4988	95.2986	111.327	122.958	142.587
RLTA1_RS06380	-0.476657	5.33685	0.00223425	0.023889	552	516	568	766	864	922	35.4832	31.2668	34.3027	43.8891	41.661	55.1449
RLTA1_RS07100	-0.602269	9.7319	0.00223918	0.0239051	12090	9274	11371	15708	22635	18123	777.159	561.953	686.717	900.013	1091.43	1083.94
RLTA1_RS25920	-1.05395	6.32415	0.00224909	0.0239743	748	815	967	1593	3577	1000	48.0823	49.3845	58.3991	91.2733	172.478	59.8101
RLTA1_RS34905	0.456603	3.35517	0.00226123	0.024067	181	183	206	156	168	144	11.6349	11.0888	12.4408	8.93825	8.10075	8.61265
RLTA1_RS00685	-0.63589	4.3151	0.00229201	0.0243204	266	214	271	477	561	296	17.0988	12.9672	16.3662	27.3304	27.0507	17.7038
RLTA1_RS02265	0.535047	4.08987	0.00228948	0.0243204	301	306	368	288	281	191	19.3486	18.5419	22.2243	16.5014	13.5495	11.4237
RLTA1_RS03510	-0.484639	6.9246	0.00230569	0.0244284	1542	1577	1801	2407	2639	2667	99.1215	95.5575	108.766	137.913	127.249	159.513
RLTA1_RS01000	-0.503454	5.78075	0.00231872	0.0245293	853	643	701	1165	1328	1039	54.8318	38.9623	42.3348	66.7504	64.0345	62.1427
RLTA1_RS05350	0.477882	6.29474	0.00236429	0.0249358	1324	1756	1363	1170	1295	1123	85.1082	106.404	82.3143	67.0369	62.4433	67.1667
RLTA1_RS12235	0.452794	4.25595	0.00236235	0.0249358	305	404	361	299	333	250	19.6057	24.4802	21.8015	17.1316	16.0568	14.9525
RLTA1_RS18125	-0.506841	5.84516	0.0023801	0.0250269	881	662	752	1240	1411	1051	56.6317	40.1136	45.4148	71.0476	68.0367	62.8604
RLTA1_RS25085	0.587173	5.40989	0.0023796	0.0250269	819	848	808	771	622	461	52.6463	51.3841	48.7967	44.1756	29.9921	27.5724
RLTA1_RS04015	-0.647108	2.18472	0.00246409	0.0257549	57	60	50	92	129	77	3.66402	3.63567	3.0196	5.27127	6.22022	4.60538
RLTA1_RS08400	-0.908397	1.5725	0.00245896	0.0257549	26	44	26	52	69	81	1.67131	2.66616	1.57019	2.97942	3.32709	4.84462
RLTA1_RS10000	-0.550188	3.07016	0.00245458	0.0257549	102	128	96	160	191	186	6.55668	7.7561	5.79763	9.16743	9.20978	11.1247
RLTA1_RS34770	0.508491	3.38844	0.00246364	0.0257549	213	190	188	155	155	157	13.6919	11.513	11.3537	8.88095	7.47391	9.39018
RLTA1_RS24725	-0.520379	6.74268	0.00249829	0.0260733	1617	1251	1389	2036	2609	2268	103.943	75.8037	83.8845	116.656	125.803	135.649
RLTA1_RS02110	0.402353	5.5573	0.00254125	0.0263788	848	877	875	773	788	655	54.5104	53.1414	52.843	44.2902	37.9964	39.1756
RLTA1_RS09990	-0.54516	6.72761	0.00253275	0.0263788	1297	1527	1363	1993	3189	1818	83.3726	92.5278	82.3143	114.192	153.77	108.735
RLTA1_RS12195	1.07206	12.1486	0.00254123	0.0263788	85258	120432	94100	77365	57630	26235	5480.48	7297.52	5682.89	4432.74	2778.85	1569.12
RLTA1_RS18210	0.427192	5.32797	0.00254267	0.0263788	789	724	717	650	654	565	50.7178	43.8704	43.3011	37.2427	31.5351	33.7927
RLTA1_RS26785	0.373489	5.0465	0.00256311	0.0265514	576	618	614	517	567	488	37.0259	37.4474	37.0807	29.6223	27.34	29.1873
RLTA1_RS02385	-0.454506	6.14888	0.00258815	0.0267315	1022	855	1023	1359	1695	1439	65.6953	51.8083	61.781	77.8659	81.7308	86.0667
RLTA1_RS17435	0.489751	7.85815	0.0025881	0.0267315	3973	4280	4935	3736	3715	3104	255.389	259.344	298.034	214.06	179.133	185.65
RLTA1_RS17445	0.439848	5.84941	0.00260362	0.0268515	1021	1002	1200	866	1089	742	65.631	60.7157	72.4704	49.6187	52.5102	44.3791
RLTA1_RS24005	0.397772	5.15447	0.00261296	0.0269081	579	724	663	527	625	529	37.2188	43.8704	40.0399	30.1952	30.1367	31.6395
RLTA1_RS26515	0.478839	4.51539	0.00262502	0.0269925	474	423	389	363	401	283	30.4693	25.6315	23.4925	20.7986	19.3357	16.9263
RLTA1_RS24045	-0.46098	3.46156	0.00263588	0.0270643	145	151	149	204	250	236	9.32076	9.14977	8.99841	11.6885	12.0547	14.1152
RLTA1_RS15460	0.881071	9.51665	0.00268976	0.0275769	15338	16091	14689	13416	8937	5798	985.944	975.026	887.098	768.689	430.931	346.779
RLTA1_RS24520	-0.530281	6.91465	0.00271108	0.0277548	1676	1360	1750	2799	2624	2347	107.735	82.4085	105.686	160.373	126.526	140.374
RLTA1_RS34640	0.426896	5.8336	0.00272277	0.0278336	1047	1075	1051	842	1118	727	67.3024	65.1391	63.472	48.2436	53.9086	43.4819
RLTA1_RS34150	0.781841	6.27525	0.00273011	0.0278679	1374	1889	1502	1219	1360	589	88.3223	114.463	90.7088	69.8444	65.5775	35.2281
RLTA1_RS34395	0.470812	5.67913	0.00273641	0.0278914	1029	952	901	757	773	803	66.1453	57.686	54.4132	43.3734	37.2731	48.0275
RLTA1_RS06530	0.468048	7.15574	0.00275306	0.0280202	2541	2441	3063	2168	2450	1946	163.338	147.911	184.981	124.219	118.136	116.39
RLTA1_RS13135	0.437711	5.86252	0.00276247	0.028041	1089	1060	1097	951	899	840	70.0022	64.2302	66.25	54.4889	43.3487	50.2405
RLTA1_RS15235	0.502466	8.8811	0.00276715	0.028041	9388	8350	9084	7350	7955	6114	603.471	505.964	548.601	421.129	383.58	365.679
RLTA1_RS19895	0.57999	11.4404	0.0027658	0.028041	55055	48783	57879	42882	39993	38420	3539	2955.98	3495.43	2456.99	1928.41	2297.9
RLTA1_RS01790	-0.491376	6.29352	0.00279615	0.0282938	979	1036	1152	1315	2059	1670	62.9312	62.7759	69.5716	75.3448	99.2824	99.8828
RLTA1_RS00980	0.424468	6.6173	0.00280391	0.0283312	1679	1877	1913	1539	1619	1422	107.928	113.736	115.53	88.1793	78.0662	85.0499
RLTA1_RS26675	0.474367	7.44013	0.00281274	0.0283794	3440	3147	3208	2791	2786	2368	221.127	190.691	193.738	159.914	134.337	141.63
RLTA1_RS21465	0.460256	7.79487	0.002827	0.0284821	3899	4411	4195	3541	3883	2850	250.632	267.282	253.344	202.887	187.233	170.459
RLTA1_RS22015	0.578186	3.83782	0.00286046	0.0287777	231	356	242	190	258	181	14.8489	21.5716	14.6149	10.8863	12.4404	10.8256
RLTA1_RS01690	0.514238	7.80068	0.00288523	0.028902	4014	4344	4393	3523	4119	2511	258.024	263.222	265.302	201.855	198.613	150.183
RLTA1_RS11635	-0.500676	5.21055	0.00288402	0.028902	434	471	583	683	1054	663	27.898	28.54	35.2085	39.1335	50.8226	39.6541
RLTA1_RS29875	0.441537	4.80848	0.00288167	0.028902	424	591	553	414	482	403	27.2552	35.8113	33.3968	23.7207	23.2414	24.1035
RLTA1_RS00880	0.501171	5.35537	0.00291906	0.029199	668	858	806	620	799	457	42.9398	51.9901	48.6759	35.5238	38.5268	27.3332
RLTA1_RS03700	-0.577388	6.88779	0.00292715	0.029238	1499	1463	1652	2502	2273	2877	96.3574	88.6497	99.7676	143.356	109.601	172.074
RLTA1_RS18885	0.650604	10.9253	0.00294728	0.0293971	42335	34588	38252	29230	34951	19730	2721.34	2095.84	2310.11	1674.78	1685.29	1180.05
RLTA1_RS00825	0.471323	6.93824	0.00296673	0.0295256	2013	2429	2493	1934	2208	1518	129.398	147.184	150.557	110.811	106.467	90.7917
RLTA1_RS01950	0.578935	8.60492	0.00297613	0.0295256	6908	7509	8278	6746	5827	4499	444.054	455.004	499.925	386.522	280.971	269.086
RLTA1_RS05475	0.574606	5.24749	0.00297708	0.0295256	577	881	754	448	601	614	37.0902	53.3838	45.5356	25.6688	28.9795	36.7234
RLTA1_RS29825	-0.975121	6.75995	0.00297445	0.0295256	1564	816	1143	2359	1976	3346	100.536	49.4451	69.028	135.162	95.2802	200.125
RLTA1_RS33790	0.469863	3.16073	0.00298948	0.0296064	146	186	168	135	151	121	9.38505	11.2706	10.1459	7.73502	7.28103	7.23702
RLTA1_RS19830	-0.757346	6.15913	0.00301253	0.0297925	897	786	890	2107	1873	966	57.6602	47.6273	53.7489	120.724	90.3137	57.7765
RLTA1_RS28875	-0.440594	7.71116	0.00301947	0.0298189	2781	2791	3066	4121	4844	4243	178.766	169.119	185.162	236.119	233.572	253.774
RLTA1_RS12175	0.56149	3.77224	0.00302951	0.0298758	280	214	291	186	199	212	17.9987	12.9672	17.5741	10.6571	9.59553	12.6797
RLTA1_RS13735	0.490707	2.95143	0.00304957	0.0300311	140	157	137	101	144	105	8.99936	9.51334	8.2737	5.78694	6.9435	6.28006
RLTA1_RS09455	-0.774868	8.20803	0.00306875	0.0301775	3790	2927	3860	7644	9119	4037	243.626	177.36	233.113	437.974	439.707	241.453
RLTA1_RS08440	-0.391806	5.0221	0.0030793	0.0301961	454	439	467	588	774	655	29.1836	26.601	28.2031	33.6903	37.3213	39.1756
RLTA1_RS17800	0.55781	4.51533	0.00307821	0.0301961	380	550	391	369	379	265	24.4268	33.327	23.6133	21.1424	18.2749	15.8497
RLTA1_RS05355	0.470466	7.4623	0.00308447	0.0302045	2810	3677	3490	2436	3058	2613	180.63	222.806	210.768	139.574	147.453	156.284
RLTA1_RS03065	0.624251	6.82367	0.00314182	0.030723	2085	2406	2187	1968	1847	1093	134.026	145.79	132.077	112.759	89.06	65.3724
RLTA1_RS25925	-0.760417	6.28751	0.00319145	0.0311646	940	898	973	1732	2754	1036	60.4243	54.4139	58.7614	99.2375	132.794	61.9632
RLTA1_RS25995	-0.654323	2.694	0.00320009	0.0312053	81	61	97	127	186	116	5.20677	3.69626	5.85802	7.27665	8.96869	6.93797
RLTA1_RS14095	0.456749	5.1556	0.00321624	0.0313191	576	798	629	492	614	537	37.0259	48.3544	37.9866	28.1899	29.6063	32.118
RLTA1_RS01845	-0.397737	4.9588	0.00323445	0.0314525	383	482	436	575	747	613	24.6197	29.2065	26.3309	32.9455	36.0194	36.6636
RLTA1_RS32930	0.424372	5.75701	0.00324527	0.0315138	854	1126	1034	774	944	810	54.8961	68.2294	62.4453	44.3475	45.5185	48.4462
RLTA1_RS05505	0.474312	5.98863	0.00325063	0.0315221	1080	1245	1264	1042	1155	732	69.4236	75.4401	76.3355	59.7029	55.6927	43.781
RLTA1_RS31310	0.842859	6.90158	0.00326446	0.0316123	1882	2607	3002	2164	1489	1017	120.977	157.97	181.297	123.99	71.7977	60.8268
RLTA1_RS20915	-0.70113	6.57603	0.00327768	0.0316964	1116	1130	1282	1894	3344	1404	71.7377	68.4718	77.4225	108.519	161.243	83.9733
RLTA1_RS33660	-0.41607	5.6111	0.00330688	0.0319345	636	722	673	887	1120	1043	40.8828	43.7492	40.6438	50.822	54.005	62.3819
RLTA1_RS05510	0.575898	5.71293	0.00340611	0.0328474	948	1291	809	755	772	764	60.9385	78.2275	48.8571	43.2588	37.2249	45.6949
RLTA1_RS07880	0.454814	3.17128	0.00342265	0.0329452	159	175	167	118	161	134	10.2207	10.604	10.0855	6.76098	7.76322	8.01455
RLTA1_RS18825	-0.501421	6.5918	0.0034257	0.0329452	1251	1140	1486	2215	2341	1653	80.4157	69.0777	89.7425	126.912	112.88	98.8661
RLTA1_RS31490	-0.415607	6.56671	0.00343223	0.0329626	1244	1325	1376	1744	2389	1830	79.9657	80.2877	83.0994	99.925	115.195	109.452
RLTA1_RS15815	0.445237	4.03718	0.00343935	0.0329856	287	352	276	241	275	241	18.4487	21.3293	16.6682	13.8084	13.2602	14.4142
RLTA1_RS27565	-0.628682	6.26553	0.00344805	0.0330237	901	896	1138	1955	2089	1120	57.9173	54.2927	68.7261	112.015	100.729	66.9873
RLTA1_RS20125	0.555289	6.6849	0.00345809	0.0330745	2066	1869	2003	1815	1451	1268	132.805	113.251	120.965	103.993	69.9654	75.8392
RLTA1_RS34880	-0.627828	6.16831	0.00346802	0.0331241	1012	771	951	1752	2007	1074	65.0525	46.7184	57.4328	100.383	96.775	64.236
RLTA1_RS29535	0.393742	6.37036	0.00347404	0.0331363	1448	1522	1593	1231	1436	1246	93.0791	92.2248	96.2044	70.5319	69.2421	74.5234
RLTA1_RS19615	-0.40495	5.17804	0.00349202	0.0332624	467	490	553	655	844	754	30.0193	29.6913	33.3968	37.5292	40.6966	45.0968
RLTA1_RS21435	-0.586439	6.16856	0.00351787	0.0334629	919	882	988	1846	1848	1064	59.0744	53.4443	59.6673	105.769	89.1082	63.6379
RLTA1_RS08330	0.489755	3.69955	0.00356528	0.0338217	200	292	242	197	214	177	12.8562	17.6936	14.6149	11.2874	10.3188	10.5864
RLTA1_RS12525	-0.457708	6.40299	0.00356086	0.0338217	988	1118	1363	1618	2114	1650	63.5098	67.7446	82.3143	92.7057	101.934	98.6866
RLTA1_RS00810	0.554716	7.25227	0.00357999	0.0339152	2991	2722	3092	2251	3001	1614	192.265	164.938	186.732	128.974	144.704	96.5335
RLTA1_RS05835	0.425192	5.88925	0.00360299	0.0340407	1100	1097	1098	1002	963	798	70.7093	66.4722	66.3104	57.4111	46.4347	47.7284
RLTA1_RS29670	-0.464211	4.20024	0.00360109	0.0340407	251	221	273	327	437	396	16.1346	13.3914	16.487	18.7359	21.0716	23.6848
RLTA1_RS19115	-0.492729	6.25036	0.00361417	0.0340881	1001	882	1186	1752	1759	1360	64.3454	53.4443	71.6249	100.383	84.8168	81.3417
RLTA1_RS23240	0.407236	5.30852	0.00362265	0.0340881	759	741	688	541	709	615	48.7894	44.9005	41.5497	30.9974	34.1871	36.7832
RLTA1_RS25150	-0.40437	3.76501	0.00361987	0.0340881	189	178	196	271	316	255	12.1491	10.7858	11.8368	15.5273	15.2371	15.2516
RLTA1_RS04735	-0.411245	3.7492	0.00367992	0.0345804	189	181	185	269	298	265	12.1491	10.9676	11.1725	15.4127	14.3692	15.8497
RLTA1_RS11735	-0.391459	4.29217	0.00372016	0.0349115	256	269	294	386	483	348	16.456	16.2999	17.7552	22.1164	23.2897	20.8139
RLTA1_RS00040	-0.589523	9.21842	0.00379101	0.0355287	8142	6656	8278	14955	14079	10215	523.377	403.317	499.925	856.869	678.872	610.96
RLTA1_RS33585	0.403733	5.07506	0.00380491	0.0356111	633	603	623	567	559	458	40.69	36.5385	37.6242	32.4871	26.9543	27.393
RLTA1_RS34810	-0.463461	3.23888	0.00382001	0.0357045	135	118	127	185	241	169	8.67795	7.15015	7.66978	10.5998	11.6207	10.1079
RLTA1_RS11460	-0.603187	4.74467	0.00384722	0.0359108	356	276	396	693	643	431	22.8841	16.7241	23.9152	39.7064	31.0047	25.7781
RLTA1_RS16200	0.394926	5.5348	0.00387843	0.0361538	761	913	884	711	761	711	48.9179	55.3228	53.3865	40.7378	36.6945	42.525
RLTA1_RS00510	0.395003	5.80622	0.00389651	0.0361774	904	1107	1079	806	998	844	58.1101	67.0781	65.163	46.1809	48.1223	50.4797
RLTA1_RS20430	0.501373	7.60319	0.00389529	0.0361774	3994	3425	3628	3130	3409	2324	256.739	207.536	219.102	179.338	164.378	138.999
RLTA1_RS35965	-0.458687	3.54068	0.00389368	0.0361774	151	149	171	211	266	252	9.70645	9.02858	10.327	12.0896	12.8262	15.0721
RLTA1_RS20150	0.376419	5.80582	0.00391444	0.0362254	934	1076	1060	859	1030	784	60.0386	65.1997	64.0155	49.2177	49.6653	46.8911
RLTA1_RS31700	-0.953257	5.55066	0.00391725	0.0362254	478	560	509	1274	1701	496	30.7264	33.9329	30.7395	72.9957	82.0201	29.6658
RLTA1_RS34030	0.627736	1.81438	0.00391626	0.0362254	58	68	76	50	51	46	3.72831	4.12043	4.58979	2.86482	2.45916	2.75126
RLTA1_RS06000	-0.601077	2.02286	0.00395191	0.0364977	43	55	54	72	106	83	2.76409	3.3327	3.26117	4.12535	5.11119	4.96424
RLTA1_RS26665	0.387901	5.12176	0.00401378	0.0370201	643	666	603	484	669	505	41.3328	40.3559	36.4164	27.7315	32.2583	30.2041
RLTA1_RS04560	0.93836	0.590809	0.00405107	0.0371949	27	40	23	18	22	13	1.73559	2.42378	1.38902	1.03134	1.06081	0.777531
RLTA1_RS07680	-0.599253	7.0132	0.00404147	0.0371949	1600	1313	2077	2444	3014	3027	102.85	79.5606	125.434	140.033	145.331	181.045
RLTA1_RS20670	-0.753877	3.56668	0.00405404	0.0371949	105	159	161	320	332	162	6.74952	9.63452	9.72311	18.3349	16.0086	9.68923
RLTA1_RS29480	-0.518852	3.18997	0.00405333	0.0371949	102	131	127	168	257	162	6.55668	7.93788	7.66978	9.62581	12.3922	9.68923
RLTA1_RS13620	0.537177	2.8462	0.00406422	0.0372393	120	147	142	81	133	105	7.71374	8.90739	8.57566	4.64101	6.41309	6.28006
RLTA1_RS00475	-0.560598	4.60349	0.0040699	0.0372425	315	278	356	449	753	406	20.2486	16.8453	21.4995	25.7261	36.3087	24.2829
RLTA1_RS02445	-0.536087	7.85043	0.0041058	0.0374437	3177	2530	3433	5092	6019	3963	204.221	153.304	207.326	291.754	290.229	237.027
RLTA1_RS13935	0.421438	7.0576	0.00410798	0.0374437	2465	2369	2571	2086	2215	1925	158.453	143.548	155.268	119.52	106.805	115.134
RLTA1_RS19280	0.53366	6.38806	0.00410153	0.0374437	1208	1939	1684	1111	1384	1249	77.6516	117.493	101.7	63.6564	66.7347	74.7028
RLTA1_RS07140	-0.819037	2.01764	0.00416709	0.0377362	49	56	32	75	133	70	3.14978	3.39329	1.93254	4.29723	6.41309	4.18671
RLTA1_RS07155	-0.534869	6.27756	0.00416659	0.0377362	1119	854	1094	1635	2164	1284	71.9306	51.7477	66.0688	93.6797	104.345	76.7961
RLTA1_RS13335	0.391758	5.9016	0.00416419	0.0377362	1068	1184	1040	948	1023	857	68.6523	71.7439	62.8077	54.317	49.3278	51.2572
RLTA1_RS18865	0.46153	4.92	0.00415244	0.0377362	440	631	635	449	552	398	28.2837	38.2351	38.3489	25.7261	26.6167	23.8044
RLTA1_RS19900	-0.630699	10.7468	0.0041531	0.0377362	24792	17952	22586	41184	44737	29205	1593.66	1087.79	1364.01	2359.7	2157.16	1746.75
RLTA1_RS16960	0.582362	5.99275	0.00420013	0.0379688	960	1370	1391	684	1152	970	61.7099	83.0145	84.0053	39.1908	55.548	58.0158
RLTA1_RS19705	0.44931	4.42445	0.00420365	0.0379688	329	431	443	281	403	312	21.1485	26.1162	26.7537	16.1003	19.4322	18.6607
RLTA1_RS18695	-0.397645	3.86307	0.0042298	0.0381556	191	202	212	275	328	295	12.2777	12.2401	12.8031	15.7565	15.8157	17.644
RLTA1_RS14310	-0.571955	3.56161	0.00426613	0.0384337	172	134	149	281	304	185	11.0564	8.11966	8.99841	16.1003	14.6585	11.0649
RLTA1_RS01755	-0.459501	7.95248	0.00430105	0.0386486	3252	3151	3733	4938	6494	4412	209.042	190.933	225.443	282.93	313.133	263.882
RLTA1_RS30620	0.55942	5.59992	0.00429937	0.0386486	919	942	942	859	811	486	59.0744	57.08	56.8893	49.2177	39.1054	29.0677
RLTA1_RS20945	0.44414	7.13642	0.00433522	0.0388556	2493	2452	2937	2033	2321	2157	160.253	148.578	177.371	116.484	111.916	129.01
RLTA1_RS22520	-0.846309	7.37232	0.00433282	0.0388556	2244	1577	1907	4845	4853	2116	144.247	95.5575	115.168	277.601	234.006	126.558
RLTA1_RS20970	-0.543422	5.45608	0.00435691	0.03895	680	535	509	1075	948	810	43.7112	32.4181	30.7395	61.5937	45.7114	48.4462
RLTA1_RS22300	-0.592517	3.94142	0.00435411	0.03895	213	199	177	269	331	395	13.6919	12.0583	10.6894	15.4127	15.9604	23.625
RLTA1_RS15290	-0.533825	3.40315	0.00437553	0.0390165	129	122	164	196	233	245	8.29227	7.39253	9.90429	11.2301	11.235	14.6535
RLTA1_RS18380	-0.465826	6.50645	0.00437516	0.0390165	1243	1127	1334	2039	2253	1512	79.9015	68.29	80.5629	116.827	108.637	90.4328
RLTA1_RS29970	-0.615897	8.35156	0.00438288	0.0390322	4360	3517	4639	8207	8526	5084	280.266	213.111	280.158	470.232	411.113	304.074
RLTA1_RS00815	0.634078	8.24071	0.00439664	0.0390648	5994	5560	6312	4434	5995	2805	385.301	336.905	381.194	254.053	289.071	167.767
RLTA1_RS17145	-0.514743	6.39131	0.00439773	0.0390648	1098	990	1266	1497	2451	1534	70.5807	59.9886	76.4563	85.7728	118.184	91.7487
RLTA1_RS07585	1.15962	10.8286	0.00441625	0.0391795	31170	51514	39943	29504	24599	8315	2003.64	3121.46	2412.24	1690.47	1186.13	497.321
RLTA1_RS28880	-0.460738	8.75457	0.00444485	0.0393832	6224	5545	5864	8795	10187	8448	400.086	335.996	354.139	503.922	491.204	505.276
RLTA1_RS00060	-0.440818	7.32274	0.00447631	0.0395813	2045	2230	2327	3301	4147	2733	131.455	135.126	140.532	189.136	199.963	163.461
RLTA1_RS06325	-0.748555	7.21457	0.00447854	0.0395813	2142	1325	1891	4055	3968	2247	137.69	80.2877	114.201	232.337	191.332	134.393
RLTA1_RS15560	0.673692	3.11042	0.00448479	0.0395864	117	227	169	105	136	120	7.52089	13.755	10.2062	6.01613	6.55775	7.17721
RLTA1_RS29145	-0.468162	5.53689	0.00452112	0.0398567	631	637	619	1075	1167	724	40.5614	38.5987	37.3826	61.5937	56.2713	43.3025
RLTA1_RS12265	0.389415	4.33871	0.0045857	0.040375	378	375	356	326	356	275	24.2983	22.7229	21.4995	18.6786	17.1659	16.4478
RLTA1_RS00800	0.540182	7.86959	0.00459499	0.0404058	4067	4632	4786	3455	4659	2489	261.431	280.674	289.036	197.959	224.651	148.867
RLTA1_RS09640	0.465798	9.41107	0.00460936	0.0404073	12499	12541	13339	10339	12355	8813	803.45	759.916	805.569	592.388	595.743	527.106
RLTA1_RS11610	-0.633976	9.36034	0.00461252	0.0404073	8882	6852	9255	16715	16793	10537	570.945	415.193	558.928	957.71	809.737	630.219
RLTA1_RS21410	-0.429484	6.31719	0.00460544	0.0404073	964	1111	1229	1666	2006	1369	61.967	67.3205	74.2218	95.4559	96.7268	81.88
RLTA1_RS18245	0.370423	4.84677	0.00463202	0.0405273	490	542	541	471	520	384	31.4978	32.8422	32.6721	26.9866	25.0737	22.9671
RLTA1_RS28750	0.618954	3.54012	0.00464943	0.0406286	267	207	203	181	143	169	17.1631	12.5431	12.2596	10.3707	6.89528	10.1079
RLTA1_RS27900	0.409999	7.20529	0.0046632	0.040698	2578	2942	2664	2267	2567	2112	165.717	178.269	160.884	129.891	123.778	126.319
RLTA1_RS13800	0.371934	5.63765	0.00467085	0.0407139	843	994	890	742	926	715	54.189	60.2309	53.7489	42.514	44.6506	42.7642
RLTA1_RS07130	0.482958	6.71327	0.00470099	0.0409178	2027	1830	2078	1711	1901	1214	130.298	110.888	125.495	98.0342	91.6638	72.6094
RLTA1_RS25490	0.426955	5.91447	0.00470596	0.0409178	973	1206	1185	785	1133	911	62.5455	73.077	71.5645	44.9777	54.6318	54.487
RLTA1_RS22690	-0.657756	6.54083	0.00473538	0.0411225	1212	1130	1159	2267	2825	1257	77.9087	68.4718	69.9943	129.891	136.218	75.1813
RLTA1_RS02270	0.409527	4.38014	0.00476975	0.0413181	339	428	384	291	358	326	21.7913	25.9344	23.1905	16.6733	17.2623	19.4981
RLTA1_RS23510	1.0347	9.65178	0.00476796	0.0413181	14070	21219	17433	13317	11730	4252	904.436	1285.75	1052.81	763.017	565.606	254.312
RLTA1_RS33300	0.391812	6.06497	0.00477756	0.0413345	1114	1285	1294	1040	1261	887	71.6092	77.8639	78.1472	59.5883	60.8038	53.0515
RLTA1_RS05805	-0.475806	5.24232	0.00480107	0.0414352	439	565	533	703	1094	644	28.2194	34.2359	32.1889	40.2794	52.7513	38.5177
RLTA1_RS31425	-0.825608	3.90884	0.00479837	0.0414352	161	181	179	287	589	201	10.3493	10.9676	10.8102	16.4441	28.4008	12.0218
RLTA1_RS05410	-0.732294	8.62347	0.00483938	0.0417143	5441	3678	5236	10864	10370	5920	349.754	222.867	316.212	622.469	500.028	354.076
RLTA1_RS33610	0.46942	7.30234	0.00486594	0.0418915	2860	2677	3370	2334	3005	1977	183.844	162.211	203.521	133.73	144.897	118.245
RLTA1_RS00875	0.454888	4.19741	0.00492791	0.0421335	276	388	365	254	350	246	17.7416	23.5107	22.0431	14.5533	16.8766	14.7133
RLTA1_RS01165	-0.429802	5.09597	0.0049044	0.0421335	510	418	480	735	727	672	32.7834	25.3285	28.9882	42.1129	35.055	40.1924
RLTA1_RS01205	0.383917	4.54906	0.00493405	0.0421335	383	440	462	368	436	310	24.6197	26.6616	27.9011	21.0851	21.0234	18.5411
RLTA1_RS07785	-0.478373	8.98108	0.00492949	0.0421335	7313	6270	6898	9937	12972	9525	470.088	379.927	416.584	569.355	625.494	569.691
RLTA1_RS19255	-0.923303	9.72599	0.00493629	0.0421335	10090	7650	10627	25780	25905	10032	648.597	463.548	641.786	1477.1	1249.11	600.015
RLTA1_RS28690	0.662213	3.52627	0.00490734	0.0421335	242	184	254	194	133	152	15.556	11.1494	15.3396	11.1155	6.41309	9.09113
RLTA1_RS29475	-1.01203	11.0774	0.00492766	0.0421335	26308	17975	25121	60258	78199	24135	1691.11	1089.19	1517.11	3452.57	3770.66	1443.52
RLTA1_RS09780	-0.407345	5.72671	0.00496128	0.0422435	675	753	782	960	1412	962	43.3898	45.6277	47.2265	55.0046	68.0849	57.5373
RLTA1_RS20640	-0.758516	8.08987	0.00495907	0.0422435	3582	2603	3626	7451	7829	3718	230.255	157.727	218.981	426.916	377.505	222.374
RLTA1_RS32595	0.464662	3.69052	0.00497034	0.0422691	224	280	219	176	250	169	14.399	16.9665	13.2258	10.0842	12.0547	10.1079
RLTA1_RS31315	0.775252	5.49601	0.00500314	0.0424963	618	1029	1134	771	668	389	39.7257	62.3517	68.4845	44.1756	32.2101	23.2661
RLTA1_RS05800	0.363091	5.29401	0.00500933	0.0424972	678	695	768	618	667	588	43.5826	42.1132	46.3811	35.4092	32.1619	35.1683
RLTA1_RS08170	-0.696736	6.79125	0.00502066	0.0425416	1463	1068	1564	2779	3246	1582	94.0433	64.7149	94.4531	159.227	156.518	94.6195
RLTA1_RS21370	-0.413394	5.17427	0.00507471	0.0428547	499	449	551	739	762	740	32.0763	27.2069	33.276	42.3421	36.7427	44.2595
RLTA1_RS23315	-0.48954	5.18547	0.00507603	0.0428547	404	546	520	610	882	829	25.9696	33.0846	31.4038	34.9508	42.5289	49.5826
RLTA1_RS24620	0.38827	6.45798	0.00506748	0.0428547	1574	1605	1660	1413	1565	1200	101.179	97.2542	100.251	80.9599	75.4623	71.7721
RLTA1_RS00155	-0.477042	3.05694	0.00508945	0.0429161	104	108	121	144	206	174	6.68524	6.54421	7.30743	8.25069	9.93306	10.407
RLTA1_RS00105	0.463466	6.50909	0.00510172	0.042966	1645	1752	1731	1521	1650	1049	105.742	106.162	104.539	87.1479	79.5609	62.7408
RLTA1_RS05235	-0.484115	6.94045	0.00511383	0.042966	1648	1605	1717	2414	3521	2024	105.935	97.2542	103.693	138.314	169.778	121.056
RLTA1_RS18775	0.411942	5.80531	0.00511334	0.042966	882	1174	1049	844	934	842	56.696	71.1379	63.3512	48.3582	45.0363	50.3601
RLTA1_RS31955	0.361349	5.5442	0.00512001	0.0429663	815	880	851	737	872	635	52.3891	53.3232	51.3936	42.2275	42.0467	37.9794
RLTA1_RS07410	0.398786	4.4249	0.00516836	0.043268	407	388	386	338	405	274	26.1624	23.5107	23.3113	19.3662	19.5286	16.388
RLTA1_RS13750	0.481166	4.49247	0.0051651	0.043268	366	525	381	315	423	295	23.5269	31.8121	23.0093	18.0484	20.3965	17.644
RLTA1_RS14775	-0.702722	3.19617	0.00517892	0.0433044	117	108	108	197	304	125	7.52089	6.54421	6.52234	11.2874	14.6585	7.47626
RLTA1_RS27335	0.48068	6.50317	0.00523556	0.0437257	1631	1654	1849	1388	1791	1020	104.843	100.223	111.665	79.5275	86.3598	61.0063
RLTA1_RS34875	0.590707	5.41228	0.00529282	0.0441511	662	958	871	561	898	438	42.5541	58.0495	52.6014	32.1433	43.3004	26.1968
RLTA1_RS20130	0.383563	3.85034	0.00532167	0.0442859	257	266	265	232	245	204	16.5203	16.1181	16.0039	13.2928	11.8136	12.2013
RLTA1_RS33690	0.571999	8.87937	0.0053194	0.0442859	8614	9335	9431	7543	8734	4727	553.718	565.65	569.557	432.187	421.143	282.722
RLTA1_RS10935	-0.530872	4.95041	0.00537519	0.0446781	466	345	409	741	766	497	29.955	20.9051	24.7003	42.4567	36.9356	29.7256
[truncated: 6,142 more rows]

## Sheet: WTvsDelpssA_limma
locus_tag	logFC	AveExpr	P.Value	adj.P.Val	DelpssA_1 raw counts	DelpssA_2 raw counts	DelpssA_3 raw counts	WT_1 raw counts	WT_2 raw counts	WT_3 raw counts	DelpssA_1 normalized counts	DelpssA_2 normalized counts	DelpssA_3 normalized counts	WT_1 normalized counts	WT_2 normalized counts	WT_3 normalized counts
[truncated: 6,982 more rows]

[truncated: 1 more sheets: WTvsDelpssA_NOISeq]
