# Supplementary material for: A New Face of the Old Gene: Deletion of the PssA, Encoding Monotopic Inner Membrane Phosphoglycosyl Transferase in Rhizobium leguminosarum, Leads to Diverse Phenotypes That Could Be Attributable to Downstream Effects of the Lack of Exopolysaccharide
Source: Int J Mol Sci. 2023 Jan 5;24(2):1035. doi: 10.3390/ijms24021035 (PMC9860679; doi:10.3390/ijms24021035)
Supplement: Supplementary file 1 [file ijms-24-01035-s001.zip › Supplementary Table S5. All DEGs log2fold change values.xlsx]

## Sheet: Arkusz1
locus_tag	edgeR log2fold	limma log2fold	NOISeq log2fold	DESeq2 log2fold	Replicon name	Accession	Strand	Locus name	Protein product	Length	Protein Name	COG_category	Description
RLTA1_RS27755	-4.31332	-4.30539	-4.32212	-4.31993	plasmid pRltTA1D	NZ_CP053206.2	+		WP_027688284.1	454	MULTISPECIES: glycoside hydrolase family 28 protein	M	Belongs to the glycosyl hydrolase 28 family
RLTA1_RS27745	-4.18599	-4.194	-4.19434	-4.19206	plasmid pRltTA1D	NZ_CP053206.2	+		WP_027688286.1	840	hypothetical protein	-	-
RLTA1_RS27750	-4.05785	-4.05799	-4.0658	-4.06466	plasmid pRltTA1D	NZ_CP053206.2	+		WP_027688285.1	364	MULTISPECIES: glycoside hydrolase family 88 protein	S	Glycosyl Hydrolase Family 88
RLTA1_RS27765	-4.00638	-4.01004	-4.0151	-4.01379	plasmid pRltTA1D	NZ_CP053206.2	+		WP_027688282.1	331	MULTISPECIES: sugar ABC transporter permease	P	ABC-type sugar transport systems, permease components
RLTA1_RS27740	-3.43349	-3.43435	-3.44075	-3.43957	plasmid pRltTA1D	NZ_CP053206.2	-		WP_027688287.1	427	carbohydrate ABC transporter substrate-binding protein	G	Bacterial extracellular solute-binding protein
RLTA1_RS27760	-3.35287	-3.35953	-3.36157	-3.35903	plasmid pRltTA1D	NZ_CP053206.2	+	ugpC	WP_027688283.1	368	MULTISPECIES: sn-glycerol-3-phosphate ABC transporter ATP-binding protein UgpC	P	Belongs to the ABC transporter superfamily
RLTA1_RS27770	-3.32055	-3.32153	-3.32901	-3.32664	plasmid pRltTA1D	NZ_CP053206.2	+		WP_027688281.1	348	MULTISPECIES: carbohydrate ABC transporter permease	P	ABC-type sugar transport system, permease component
RLTA1_RS17020	-1.85349	-1.68852	-1.86038	-1.85985	chromosome	NZ_CP053205.2	+	hlyD	WP_027689252.1	337	secretion protein HlyD	M	secretion protein
RLTA1_RS19195	-1.33719	-1.33699	-1.34393	-1.34347	chromosome	NZ_CP053205.2	+		WP_032995934.1	349	bile acid:sodium symporter	S	Bile acid
RLTA1_RS33555	-1.28258	-1.3269	-1.29119	-1.28905	plasmid pRltTA1B	NZ_CP053208.2	-		WP_027690146.1	563	ABC transporter substrate-binding protein	E	Bacterial extracellular solute-binding proteins, family 5 Middle
RLTA1_RS15445	-1.27004	-1.28241	-1.278	-1.27683	chromosome	NZ_CP053205.2	+		WP_003561157.1	48	MULTISPECIES: hypothetical protein	-	-
RLTA1_RS29820	-1.24372	-1.33121	-1.254	-1.2505	plasmid pRltTA1C	NZ_CP053207.2	+		WP_018069359.1	317	MULTISPECIES: substrate-binding domain-containing protein	G	Periplasmic binding proteins and sugar binding domain of LacI family
RLTA1_RS12380	-1.23901	-1.19963	-1.24654	-1.24533	chromosome	NZ_CP053205.2	-		WP_018074632.1	308	ABC transporter ATP-binding protein	V	ABC transporter, ATP-binding protein
RLTA1_RS17025	-1.21757	-1.20498	-1.22564	-1.22406	chromosome	NZ_CP053205.2	+		WP_027689253.1	581	ABC transporter ATP-binding protein	V	ABC transporter, ATP-binding protein
RLTA1_RS06920	-1.20965	-1.18626	-1.21737	-1.21555	chromosome	NZ_CP053205.2	-		WP_018069425.1	393	MULTISPECIES: ROK family transcriptional regulator	K	ROK family
RLTA1_RS20855	-1.1986	-1.18683	-1.20666	-1.20452	chromosome	NZ_CP053205.2	-		WP_018069038.1	135	MULTISPECIES: F0F1 ATP synthase subunit epsilon	C	Produces ATP from ADP in the presence of a proton gradient across the membrane
RLTA1_RS34045	-1.16939	-1.18699	-1.17814	-1.17593	plasmid pRltTA1B	NZ_CP053208.2	-		WP_027690086.1	513	L-aspartate oxidase	H	Catalyzes the oxidation of L-aspartate to iminoaspartate
RLTA1_RS29815	-1.16837	-1.18895	-1.17694	-1.17464	plasmid pRltTA1C	NZ_CP053207.2	+		WP_018069358.1	340	MULTISPECIES: LacI family DNA-binding transcriptional regulator	K	helix_turn _helix lactose operon repressor
RLTA1_RS25910	-1.15868	-1.18997	-1.16704	-1.16532	plasmid pRltTA1D	NZ_CP053206.2	-		WP_027688086.1	321	alpha/beta hydrolase	I	Serine aminopeptidase, S33
RLTA1_RS00415	-1.1401	-1.10656	-1.14874	-1.14588	chromosome	NZ_CP053205.2	-	rpmH	WP_003545006.1	44	MULTISPECIES: 50S ribosomal protein L34	J	structural constituent of ribosome
RLTA1_RS19670	-1.08893	-1.08157	-1.09744	-1.0949	chromosome	NZ_CP053205.2	-		WP_027689364.1	532	MULTISPECIES: DHA2 family efflux MFS transporter permease subunit	EGP	Major facilitator superfamily
RLTA1_RS11380	-1.06734	-1.05619	-1.0753	-1.07378	chromosome	NZ_CP053205.2	+		WP_020397554.1	184	MULTISPECIES: serine hydrolase family protein	S	Alpha beta hydrolase
RLTA1_RS17695	-1.05969	-1.08074	-1.06823	-1.06608	chromosome	NZ_CP053205.2	+		WP_018073659.1	412	MULTISPECIES: extracellular solute-binding protein	G	Bacterial extracellular solute-binding protein
RLTA1_RS21630	-1.05291	-1.0392	-1.06225	-1.05938	chromosome	NZ_CP053205.2	-		WP_007632398.1	112	MULTISPECIES: P-II family nitrogen regulator	K	Belongs to the P(II) protein family
RLTA1_RS06710	-1.03481	-1.03043	-1.04262	-1.04105	chromosome	NZ_CP053205.2	+		WP_026170782.1	203	riboflavin synthase	H	riboflavin synthase, alpha
RLTA1_RS09995	-1.03052	-1.02905	-1.037	-1.03659	chromosome	NZ_CP053205.2	+		WP_027689090.1	434	extracellular solute-binding protein	G	ABC transporter
RLTA1_RS07700	-1.02305	-1.01559	-1.03066	-1.02895	chromosome	NZ_CP053205.2	+	rpsJ	WP_003547547.1	102	MULTISPECIES: 30S ribosomal protein S10	J	Involved in the binding of tRNA to the ribosomes
RLTA1_RS25915	-1.00922	-1.02201	-1.01697	-1.0156	plasmid pRltTA1D	NZ_CP053206.2	-		WP_027688085.1	228	glutathione S-transferase	O	Glutathione S-transferase, C-terminal domain
RLTA1_RS24470	-1.00652	-1.00393	-1.01467	-1.01295	chromosome	NZ_CP053205.2	+	gshB	WP_018070007.1	315	glutathione synthase	H	Belongs to the prokaryotic GSH synthase family
RLTA1_RS17700	-1.00514	-1.00714	-1.01442	-1.01162	chromosome	NZ_CP053205.2	+		WP_018073658.1	294	MULTISPECIES: sugar ABC transporter permease	G	ABC transporter permease
RLTA1_RS34270	1.01609	1.01384	1.0082	1.00993	plasmid pRltTA1A	NZ_CP053209.2	-		WP_027689833.1	277	universal stress protein	T	Belongs to the universal stress protein A family
RLTA1_RS13105	1.01799	1.00661	1.01141	1.01255	chromosome	NZ_CP053205.2	-		WP_020397677.1	606	MULTISPECIES: methyl-accepting chemotaxis protein	T	chemotaxis protein
RLTA1_RS32075	1.02429	1.02352	1.01761	1.01838	plasmid pRltTA1B	NZ_CP053208.2	-		WP_027689968.1	191	HutD family protein	S	protein conserved in bacteria
RLTA1_RS05790	1.02587	1.03081	1.01932	1.02014	chromosome	NZ_CP053205.2	-		WP_018070978.1	769	PAS domain-containing sensor histidine kinase	T	Histidine kinase
RLTA1_RS23180	1.04129	1.04706	1.03328	1.03541	chromosome	NZ_CP053205.2	+		WP_026170774.1	99	hypothetical protein	-	-
RLTA1_RS29615	1.0662	1.06559	1.05958	1.06085	plasmid pRltTA1C	NZ_CP053207.2	-	cydX	WP_018069319.1	40	MULTISPECIES: cytochrome bd-I oxidase subunit CydX	S	Membrane bound YbgT-like protein
RLTA1_RS18655	1.11086	1.132	1.10548	1.10585	chromosome	NZ_CP053205.2	-		WP_017968162.1	122	MULTISPECIES: response regulator	T	response regulator
RLTA1_RS29625	1.12658	1.13541	1.11895	1.12033	plasmid pRltTA1C	NZ_CP053207.2	-		WP_027688809.1	526	cytochrome ubiquinol oxidase subunit I	C	oxidase, subunit
RLTA1_RS13975	1.135	1.22467	1.12811	1.12852	chromosome	NZ_CP053205.2	+		WP_018074329.1	351	MULTISPECIES: ornithine cyclodeaminase	E	ornithine cyclodeaminase
RLTA1_RS34280	1.14208	1.14679	1.13313	1.13627	plasmid pRltTA1A	NZ_CP053209.2	+		WP_027689835.1	107	MULTISPECIES: TraR/DksA family transcriptional regulator	T	DnaK suppressor protein
RLTA1_RS33005	1.15246	1.13058	1.14614	1.14704	plasmid pRltTA1B	NZ_CP053208.2	+		WP_027690215.1	401	ABC transporter substrate-binding protein	E	ABC-type branched-chain amino acid transport systems, periplasmic component
RLTA1_RS29630	1.16391	1.17263	1.15604	1.15772	plasmid pRltTA1C	NZ_CP053207.2	-		WP_027688808.1	563	ATP-binding cassette domain-containing protein	CO	ABC-type transport system involved in cytochrome bd biosynthesis, fused ATPase and permease components
RLTA1_RS34355	1.16401	1.18367	1.15639	1.15774	plasmid pRltTA1A	NZ_CP053209.2	-		WP_027689847.1	639	PAS domain-containing hybrid sensor histidine kinase/response regulator	T	Histidine kinase
RLTA1_RS23015	1.16441	1.14998	1.15794	1.15882	chromosome	NZ_CP053205.2	+		WP_011649924.1	69	MULTISPECIES: SlyX family protein	S	Belongs to the SlyX family
RLTA1_RS32080	1.17045	1.18471	1.16312	1.16431	plasmid pRltTA1B	NZ_CP053208.2	-		WP_027689967.1	557	urocanate hydratase	E	Catalyzes the conversion of urocanate to 4-imidazolone- 5-propionate
RLTA1_RS12985	1.17057	1.17015	1.16264	1.16494	chromosome	NZ_CP053205.2	+		WP_018074520.1	228	GntR family transcriptional regulator	K	FCD
RLTA1_RS09750	1.1758	1.1761	1.16885	1.17002	chromosome	NZ_CP053205.2	-		WP_018073497.1	135	EF-hand domain-containing protein	S	EF hand
RLTA1_RS23165	1.19117	1.19034	1.18339	1.18507	chromosome	NZ_CP053205.2	+		WP_024323148.1	152	pseudoazurin	C	pseudoazurin
RLTA1_RS26875	1.19893	1.20891	1.19185	1.19294	plasmid pRltTA1D	NZ_CP053206.2	-		WP_024322987.1	399	MULTISPECIES: mandelate racemase/muconate lactonizing enzyme family protein	M	mandelate racemase muconate lactonizing
RLTA1_RS26880	1.2154	1.23483	1.20833	1.20934	plasmid pRltTA1D	NZ_CP053206.2	-		WP_027687942.1	453	MULTISPECIES: mandelate racemase/muconate lactonizing enzyme family protein	M	Mandelate racemase / muconate lactonizing enzyme, C-terminal domain
RLTA1_RS19735	1.22716	1.22901	1.21907	1.22089	chromosome	NZ_CP053205.2	+		WP_018072709.1	475	gamma-aminobutyraldehyde dehydrogenase	C	Belongs to the aldehyde dehydrogenase family
RLTA1_RS19740	1.24268	1.23995	1.23482	1.23677	chromosome	NZ_CP053205.2	-		WP_026170948.1	204	YjbE family putative metal transport protein	P	Integral membrane protein TerC family
RLTA1_RS34450	1.24737	1.2622	1.24117	1.24196	plasmid pRltTA1A	NZ_CP053209.2	-		WP_051320259.1	138	EF-hand domain-containing protein	S	EF hand
RLTA1_RS29620	1.25927	1.25616	1.25155	1.25299	plasmid pRltTA1C	NZ_CP053207.2	-	cydB	WP_027688810.1	384	cytochrome d ubiquinol oxidase subunit II	C	oxidase, subunit
RLTA1_RS23580	1.2703	1.28747	1.26231	1.26439	chromosome	NZ_CP053205.2	-		WP_018070357.1	205	acetyltransferase	S	-acetyltransferase
RLTA1_RS22670	1.27499	1.3342	1.26739	1.26867	chromosome	NZ_CP053205.2	+		WP_018068899.1	536	MULTISPECIES: phosphoenolpyruvate carboxykinase	C	Involved in the gluconeogenesis. Catalyzes the conversion of oxaloacetate (OAA) to phosphoenolpyruvate (PEP) through direct phosphoryl transfer between the nucleoside triphosphate and OAA
RLTA1_RS23585	1.27692	1.28262	1.26882	1.27098	chromosome	NZ_CP053205.2	-	phnL	WP_018070356.1	235	MULTISPECIES: phosphonate C-P lyase system protein PhnL	P	ABC transporter
RLTA1_RS14850	1.28035	1.2971	1.27267	1.27405	chromosome	NZ_CP053205.2	-		WP_018074173.1	424	MULTISPECIES: YeaH/YhbH family protein	S	Belongs to the UPF0229 family
RLTA1_RS23265	1.28171	1.28648	1.27494	1.27621	chromosome	NZ_CP053205.2	-		WP_024323161.1	105	MULTISPECIES: hypothetical protein	-	-
RLTA1_RS10050	1.30483	1.33878	1.29804	1.29886	chromosome	NZ_CP053205.2	+		WP_003539529.1	300	ABC transporter permease	EP	ABC-type dipeptide oligopeptide nickel transport systems, permease components
RLTA1_RS10065	1.31533	1.32251	1.31032	1.3101	chromosome	NZ_CP053205.2	-		WP_018069614.1	350	LacI family DNA-binding transcriptional regulator	K	transcriptional regulator
RLTA1_RS20755	1.31838	1.35348	1.31101	1.31204	chromosome	NZ_CP053205.2	+		WP_018069019.1	399	MULTISPECIES: ornithine--oxo-acid transaminase	E	Belongs to the class-III pyridoxal-phosphate-dependent aminotransferase family
RLTA1_RS14840	1.31801	1.3084	1.31142	1.31239	chromosome	NZ_CP053205.2	-		WP_018074175.1	308	MULTISPECIES: adenylate cyclase	T	Adenylate cyclase
RLTA1_RS23195	1.33331	1.33427	1.32548	1.32747	chromosome	NZ_CP053205.2	+	adhP	WP_026170773.1	357	alcohol dehydrogenase AdhP	S	Zn-dependent alcohol dehydrogenases
RLTA1_RS07405	1.36366	1.36639	1.35379	1.35802	chromosome	NZ_CP053205.2	+		WP_018069505.1	328	substrate-binding domain-containing protein	G	Periplasmic binding proteins and sugar binding domain of LacI family
RLTA1_RS12190	1.42634	1.45812	1.42096	1.42051	chromosome	NZ_CP053205.2	+	ugpC	WP_018068624.1	362	MULTISPECIES: sn-glycerol-3-phosphate ABC transporter ATP-binding protein UgpC	P	Belongs to the ABC transporter superfamily
RLTA1_RS29840	1.44093	1.52975	1.43143	1.43489	plasmid pRltTA1C	NZ_CP053207.2	+		WP_024320147.1	257	MULTISPECIES: hypothetical protein	S	Putative glutamine amidotransferase
RLTA1_RS10120	1.48171	1.57245	1.47614	1.47568	chromosome	NZ_CP053205.2	+		WP_018069604.1	400	ABC transporter permease	V	ABC-type antimicrobial peptide transport system, permease component
RLTA1_RS29845	1.56226	1.65578	1.55273	1.55608	plasmid pRltTA1C	NZ_CP053207.2	+		WP_024320148.1	280	MULTISPECIES: BtpA/SgcQ family protein	S	BtpA family
RLTA1_RS07400	1.56631	1.5913	1.55416	1.56062	chromosome	NZ_CP053205.2	+		WP_018069504.1	334	sugar ABC transporter permease	G	Ribose xylose arabinose galactoside ABC-type transport systems, permease components
RLTA1_RS14845	1.60818	1.63395	1.60052	1.60184	chromosome	NZ_CP053205.2	-		WP_018074174.1	516	MULTISPECIES: SpoVR family protein	S	SpoVR family
RLTA1_RS07395	1.69889	1.73026	1.68765	1.69364	chromosome	NZ_CP053205.2	+		WP_026170697.1	492	sugar ABC transporter ATP-binding protein	G	COG1129 ABC-type sugar transport system, ATPase component
RLTA1_RS29850	1.7223	1.76808	1.71155	1.71618	plasmid pRltTA1C	NZ_CP053207.2	+		WP_024320149.1	215	MULTISPECIES: TenA family protein	K	Catalyzes an amino-pyrimidine hydrolysis reaction at the C5' of the pyrimidine moiety of thiamine compounds, a reaction that is part of a thiamine salvage pathway. Thus, catalyzes the conversion of 4-amino-5-aminomethyl-2-methylpyrimidine to 4-amino- 5-hydroxymethyl-2-methylpyrimidine (HMP)
RLTA1_RS34380	1.73705	1.73478	1.72936	1.7315	plasmid pRltTA1A	NZ_CP053209.2	-		WP_027689851.1	215	BON domain-containing protein	S	bacterial OsmY and nodulation domain
RLTA1_RS10055	1.81538	1.89224	1.80964	1.80967	chromosome	NZ_CP053205.2	+		WP_017994035.1	281	ABC transporter ATP-binding protein	EP	ABC transporter
RLTA1_RS13980	1.86663	1.97998	1.86066	1.86034	chromosome	NZ_CP053205.2	+		WP_027689180.1	310	amidinotransferase	S	Amidinotransferase
RLTA1_RS34350	1.89957	1.94111	1.89257	1.89353	plasmid pRltTA1A	NZ_CP053209.2	+		WP_027689846.1	215	BON domain-containing protein	S	BON domain
RLTA1_RS10060	2.04455	2.10658	2.03907	2.03895	chromosome	NZ_CP053205.2	+		WP_012757399.1	247	ABC transporter ATP-binding protein	EP	ABC transporter
RLTA1_RS34375	2.27612	2.2906	2.26907	2.27022	plasmid pRltTA1A	NZ_CP053209.2	+		WP_085065922.1	191	Hsp20/alpha crystallin family protein	O	Belongs to the small heat shock protein (HSP20) family
