# Supplementary material for: A New Face of the Old Gene: Deletion of the PssA, Encoding Monotopic Inner Membrane Phosphoglycosyl Transferase in Rhizobium leguminosarum, Leads to Diverse Phenotypes That Could Be Attributable to Downstream Effects of the Lack of Exopolysaccharide
Source: Int J Mol Sci. 2023 Jan 5;24(2):1035. doi: 10.3390/ijms24021035 (PMC9860679; doi:10.3390/ijms24021035)
Supplement: Supplementary file 1 [file ijms-24-01035-s001.zip › Supplementary Table S6. DEGs rate on individual RtTA1 replicons.xlsx]

## Sheet: DEG_replikony
all genes	mean	median		upregulated DEGs	mean	median		downregulated DEGs	mean	median
Replicon	log2fold	log2fold		Replicon	log2fold	log2fold		Replicon	log2fold	log2fold
chromosome	0.335822	1.167490		chromosome	1.34495	1.28103		chromosome	-1.34606	-1.11452
pRltTA1A	1.497469	1.247367		plasmid pRltTA1A	1.49747	1.24737		plasmid pRltTA1B	-1.22599	-1.22599
pRltTA1B	0.179046	1.024291		plasmid pRltTA1B	1.11573	1.15246		plasmid pRltTA1C	-1.20605	-1.20605
pRltTA1C	0.769930	1.163914		plasmid pRltTA1C	1.33449	1.25927		plasmid pRltTA1D	-3.20426	-3.43349
pRltTA1D	-2.402184	-3.352872		plasmid pRltTA1D	1.20716	1.20716
