# Supplementary material for: A New Face of the Old Gene: Deletion of the PssA, Encoding Monotopic Inner Membrane Phosphoglycosyl Transferase in Rhizobium leguminosarum, Leads to Diverse Phenotypes That Could Be Attributable to Downstream Effects of the Lack of Exopolysaccharide
Source: Int J Mol Sci. 2023 Jan 5;24(2):1035. doi: 10.3390/ijms24021035 (PMC9860679; doi:10.3390/ijms24021035)
Supplement: Supplementary file 1 [file ijms-24-01035-s001.zip › Supplementary Table S7. Comparison of set of data of proteomic and transcriptomic of delpssA.xlsx]

## Sheet: Guerreiro 2000
peptide name (Guerreiro et al. 2000)	RefSeq ID (on the basis of best Blast hit)	RefSeq annotation	log2Fold change in delpssA mutant
n2	WP_027688673.1	ABC transporter substrate-binding protein	0.7
n4	WP_027688099.1	FMN reductase	0.2
n5	WP_027688823.1	MULTISPECIES: FMN reductase	0.3
n6	WP_027688099.1	FMN reductase	0.2
n7	WP_027688823.1	MULTISPECIES: FMN reductase	0.3
n8	WP_017969274.1	MULTISPECIES: TauD/TfdA family dioxygenase	0.5
n15	WP_027688924.1	taurine ABC transporter substrate-binding protein	0.3
n16	WP_018073415.1	thioredoxin domain-containing protein	0.2
n17	WP_027688822.1	MetQ/NlpA family lipoprotein	0.1
n18	WP_027688786.1	MULTISPECIES: substrate-binding domain-containing protein	0.3
n19	WP_024320298.1	MULTISPECIES: ABC transporter substrate-binding protein	0.4
n21	WP_027688924.1	taurine ABC transporter substrate-binding protein	0.3
n22	WP_027688822.1	MetQ/NlpA family lipoprotein	0.1
